# Supplementary material
Source: publisher figshare collection journal article supplement (https://gsajournals.figshare.com/articles/dataset/_/6007715)
Supplement: Supplementary file 1 [file 1]

## Sheet: Sheet1
Included in GWAS	iStraw35 Probeset ID	iStraw35 Affymetrix SNP ID	iStraw90 Probeset ID	iStraw90 Affymetrix SNP ID	Reference Allele	Alternate Allele	Polymorphism Type (Bassil et al. 2015)	iStraw90 Chromosome	iStraw90 Chromosome Position (bp)	F.vesca 4.0 Chromosome	F.vesca 4.0 Chromosome Position (bp)	Flanking Sequence
N	AX-166520440	Affx-88809174	AX-89876109	Affx-88809174	T	C	SNP	1	8158	4	2933450	CATATGATTCTTAATCACTACTATCCCCCATGCCC[C/T]GAGCCTGATCTGACTATGGGCACTAATCAACACTC
N	AX-123614522	Affx-88809184	AX-89806523	Affx-88809184	G	GTAC	Indel	1	67882	1	NA	GGAATCTATGTCAGAGACAAGGAAAAATTCACCGG[-/TAC]TGTAATGGTAACCGGCTTTGATCCATGTCTGAGTG
N	AX-166511079	Affx-88809189	AX-89819122	Affx-88809189	A	G	SNP	1	86807	NA	NA	TGAGGCGAGTTTGCGGAGGAAATGGCGACTTGGTA[A/G]GTGGTGGGGTTGAGATCTGCGAAAGCACAGAAGAG
N	AX-89780898	Affx-88809193	AX-89780898	Affx-88809193	A	C	SNP	1	96673	1	656606	CATTGGCAGCTACGATTATTCAGGATATGGAGCAT[A/C]CAGCGGTAAGGTAAGAATTAGTAATATGTGGAAAT
Y	AX-123366853	Affx-88809195	AX-89904335	Affx-88809195	T	C	SNP-SNP	1	97787	1	655492	CATTTTTCTCTAGAAGGTTGGTAATTTATTAGGTT[C/T]TCCGTTGTTCAACAAATAGTGGTTCCGATTATACT
N	AX-123359903	Affx-88809197	AX-89815812	Affx-88809197	A	C	SNP	1	100160	1	653118	ATGGTTTCGAAGGAGCCAAACCTAGACATGGAGTC[A/C]ATGACCGAGGGAGTGGTTTGCATATGAGTTGTTGG
N	AX-166519489	Affx-88809198	AX-89815852	Affx-88809198	T	C	SNP	1	103078	1	650200	GATGTGGAACTTGTAATGAAGGGAATAGATCATGG[C/T]GCTTGTGATTATATGTTGAAACCTGTTAGACTTGA
N	AX-166509093	Affx-88809199	AX-89803020	Affx-88809199	C	CTGG	Indel	1	103942	1	649333	ACAGGAGGAATGACTTCTGCTGGTCTGGGCCAACC[-/TGG]TCACTCCCAAAACTTGAGCAGCTATATTAATCCTT
Y	AX-123359911	Affx-88809200	AX-89815880	Affx-88809200	A	G	SNP	1	104915	1	648363	AACAGTTATGAATCTTTTGATGATATAATGAGCAC[A/G]ATAATGAGAAGGGTATGATTAGCTGCTTATCTCAA
N	AX-166510324	Affx-88809201	AX-89815909	Affx-88809201	A	G	SNP	1	106444	1	646834	CTACGACTTGATGCCAATTATCATATGCTCTCTTC[A/G]TCAAAGTATCCACTGAAACCTGCATAACAAAATCT
N	AX-166502485	Affx-88809203	AX-89778378	Affx-88809203	A	G	SNP	1	106736	1	646542	TCCACAGTGTTTTCCCACATCCTATTGGACATACC[A/G]CTCCCCAGGACCTGCATTCAGGAATTTTGAAACAA
Y	AX-123524128	Affx-88809205	AX-89815916	Affx-88809205	A	G	SNP	1	107382	1	645896	TCAAAATGCTCTTTTGTCCAACCATCCTCAACTTC[A/G]TCATTGAAGTCACCTTCCAGTACAACAATATTAAG
N	AX-166510332	Affx-88809207	AX-89815931	Affx-88809207	A	C	SNP	1	108025	1	645253	CTCCAAAGTTGAGGCAAGCCTTTGCAAGCTATCCA[A/C]CTTCAGGGATTCCACAATGACACTGCAAATGAATG
N	AX-166509097	Affx-88809212	AX-89803055	Affx-88809212	A	AAGT	Indel	1	122246	1	631026	GATTAAATAAGTTCCGCAAATTTTCAACAATTCAA[-/AGT]ATATTCAACCCTCAATGTCCCATTGGGTGTGGTCA
N	AX-166527516	Affx-88809220	AX-89904117	Affx-88809220	A	G	SNP-SNP	1	140806	1	612469	TCAATACGCTATCTGTATATCTATTGCTGCCATGT[A/G]TTAGGAACAAACATACAAACTCAGAGAATTCTACC
N	AX-89873697	Affx-88809226	AX-89816594	Affx-88809226	A	G	SNP	1	154401	1	598896	TGATATCAGCAATTTCAATTTCTTTATTCCTTCTT[A/G]AATTCTCTTTATGTTTTCTATCATGGACCTTTTGA
N	AX-166510509	Affx-88809227	AX-89816602	Affx-88809227	T	C	SNP	1	154775	1	598522	TCTTCATGTGATTGCTTAAGCCTATGCCACTCCTC[C/T]CTTTCTCTTTGTCTGTCACCTCTCTCCCTCTGCAA
N	AX-89778925	Affx-88809229	AX-89778925	Affx-88809229	A	G	SNP	1	155150	1	598147	TCTAACTGCTTTCTTGACTGCATATACTCATCTTT[A/G]TCACTCCTCTCACTTTCACGAATCTTACTCCTGTG
N	AX-166510516	Affx-88809231	AX-89816622	Affx-88809231	T	G	SNP	1	155899	1	597398	ATTGTCAGGAAATTTCATGTCTCTTGTACTCCTAG[G/T]AGATCTGTCACGTGCTCTTCTCTGTGTACCCCTAT
N	AX-166519944	Affx-88809234	AX-89816679	Affx-88809234	A	G	SNP	1	159431	1	593866	CCCATTGCGTTGTTATCATTCAACACAATCTGCAA[A/G]TCATCCTCACTATCATCACTGTCCCAATCATCGCC
Y	AX-166510557	Affx-88809236	AX-89816775	Affx-88809236	A	G	SNP	1	166288	1	587606	GTAAAACTGGTGAGTAAACTATCAGAACCAGCTTG[A/G]TGAGAAATGCCAACTCTCTCCACATCCAACAGCTC
N	AX-89816776	Affx-88809237	AX-89816776	Affx-88809237	A	C	SNP	1	166526	1	587368	TATGGAAGGTCACCCAAACCACATTTTCATTCAGC[A/C]CAATACCAGAGGTCATCAACAGCTCACTGAACCTA
N	AX-166502666	Affx-88809238	AX-89779024	Affx-88809238	T	C	SNP	1	166569	1	587325	AGAGGTCATCAACAGCTCACTGAACCTACGAGCAT[C/T]GATACCCTTCTCATTGTTCTTCTTGAAATCCATTC
N	AX-123602801	Affx-88809239	AX-89865033	Affx-88809239	T	C	F.innumae-derived	1	166732	1	587162	TCAGTTCCACAGGTGGGCAGGTTCCCATTCTCGTC[C/T]GAAAACGTGAGACCCAGCTGAATCAACTTCAACAG
Y	AX-166510640	Affx-88809248	AX-89817116	Affx-88809248	A	G	SNP	1	185979	1	567859	TGTGGGTTTTTGGAATGACAGACAGATAAGGCTTC[A/G]ATGCTGGATGAGATCATCGACTATGTAAAGTTCCT
Y	AX-166519452	Affx-88809250	AX-89867463	Affx-88809250	T	C	SNP-in-Insertion	1	191574	1	562268	ATGGTAATGGAAGAGGATATATTCAGTTTTTCACT[C/T]TCGCTCCCATCCAATTCCATTATTCTATCTCGTTC
Y	AX-123365016	Affx-88809251	AX-89817280	Affx-88809251	A	G	SNP	1	195507	1	558332	TTGAGTTTGATTGATGCAGTGAAAGTTGGTCCTTC[A/G]CTGAAAGTTGATAGCAATCAGACATGGGTGAGTCT
N	AX-166520114	Affx-88809259	AX-89874536	Affx-88809259	A	G	SNP	1	203884	1	549954	CACCTTCTCTTTCCCCACCACCTTCATCGCCATGG[A/G]CTTTCCCGTCTTCAAGTTCCGGGCATGGTACACCT
N	AX-166519454	Affx-88809264	AX-89867480	Affx-88809264	A	T	SNP-in-Insertion	1	218886	1	534944	GCTCTTTCTTCTCCTTGCCAAGTTTCTTCAGCTCC[A/T]TCTTCTTCTGCTGCTACATCATCTTCCACCCACTC
N	AX-89779559	Affx-88809268	AX-89779559	Affx-88809268	T	C	SNP	1	221232	1	532597	CAATTCCAAATATAAAAACTGATCTTGATACATCT[C/T]TCCACATTACTAAATCCACTGCAACAACAACAACA
N	AX-166502817	Affx-88809269	AX-89779562	Affx-88809269	A	G	SNP	1	221518	1	532311	GAGAAGAAGAACTTACATGATGTATGTTTAGGGAC[A/G]TATGAGTAGACTGCTGCACGTCTCATAACAGGAGA
Y	AX-166520142	Affx-88809270	AX-89817487	Affx-88809270	A	C	SNP	1	221865	1	531964	GCTTATCTTTTCAACTTCAACCTCAATTTCCTCAT[A/C]CACCTCTTCCTCCAATTCATCTTCTTCATCTTCAT
N	AX-166502819	Affx-88809271	AX-89779564	Affx-88809271	A	G	SNP	1	222302	1	531527	CAATCTTTGTCTTCCTACTCCCAACAGGGCTTGAA[A/G]CAACACCATTTTGACTCTCCTTGCTTCCCTCAGAT
N	AX-123364703	Affx-88809272	AX-89867026	Affx-88809272	A	G	SNP-in-Insertion	1	235160	1	516472	TTAGAGAAGATAATGTTTGTAGAAGTATCATTATT[A/G]AGCTTACCATTAACTCATGCAATGGAACCTTCACC
N	AX-166510732	Affx-88809275	AX-89817521	Affx-88809275	T	C	SNP	1	235825	1	515806	ACTCATGGTACGTGATAGACGGCTTTTTGCATTAC[C/T]TGTGGAGCTAAGTGGTGGTGGTGGAGGAGTTCCCA
Y	AX-166510734	Affx-88809278	AX-89817530	Affx-88809278	T	C	SNP	1	238225	1	513406	TCCAGAGGAGGCCATTCTAAGGCTACATTCCTCCT[C/T]GATACATACTGTAGATACCTAAGTTGAGAAGGAAT
N	AX-166520152	Affx-88809278	AX-89817530	Affx-88809278	T	C	SNP	1	238225	1	513406	TCCAGAGGAGGCCATTCTAAGGCTACATTCCTCCT[C/T]GATACATACTGTAGATACCTAAGTTGAGAAGGAAT
N	AX-166510735	Affx-88809280	AX-89817531	Affx-88809280	A	G	SNP	1	238354	1	513277	TCCAACGTCCTATGCTCACCAGTATAATGCTTCCT[A/G]TAAATCAAGAGTGCAGCCAGCATGAAGGCTAAAAC
N	AX-166510745	Affx-88809289	AX-89817572	Affx-88809289	A	G	SNP	1	249975	1	501667	ACTTGTTATCTTAATTCGGTGTTGCAATGCCTGAC[A/G]TATACTGAGCCTTTAGCTGCTTACTTGCAAAGTGG
Y	AX-166510224	Affx-88809290	AX-89812663	Affx-88809290	T	C	SNP	1	250908	1	500734	CATGTTATTTCTTCAGGTCAAATGTTTGCAGTGCT[C/T]GTATTGCTCTGACAAGTTAGATCCATTCCTAGATT
N	AX-166510228	Affx-88809296	AX-89812849	Affx-88809296	T	C	SNP	1	253159	1	498483	TTCGAAGAGAAAGAGAAACAAATCTGGCTTGAAAA[C/T]GGATGAAGATGGAACTTCTGATAAGTACTTAGTGA
N	AX-166502826	Affx-88809300	AX-89779586	Affx-88809300	A	G	SNP	1	257710	1	493932	TTATCAGTCTGAGAGTTCTTAGGCTCAGTCAAAAT[A/G]GGTTTGAAATGGGCATTCCTTCAGGGATTGTGGGC
N	AX-166520166	Affx-88809311	AX-89874754	Affx-88809311	T	G	SNP	1	270595	1	481045	TAGTTCATTTTAACAAGTCTCCCCAAGGCATAACG[G/T]CCCAAGAACCCATTAGCAAATTTCAAAAGGTCCAC
Y	AX-123357024	Affx-88809313	AX-89779626	Affx-88809313	T	G	SNP	1	273500	1	478141	GAAAAGCTCAAGAATCGAGAAAACTAACCGGAATC[G/T]GCGGCTTAGTATATCGATGAGGCCATCTCCGGCGA
N	AX-166502454	Affx-88809314	AX-89779627	Affx-88809314	A	C	SNP	1	273658	1	477983	CTCTCTTTCACGTACTTCCTCGACTTCGGCTTAAT[A/C]TCCACCGCCATTGAAGCAATCTCACTACACTCCGA
N	AX-166517598	Affx-88809315	AX-89847038	Affx-88809315	A	G	SNP-SNP	1	275920	1	475721	GAGAAGAACATCATTCCAAAACAATACAAAGATGA[A/G]CATCATTTTAAAACCGCCCTCAAAACCATAATATG
Y	AX-166520167	Affx-88809316	AX-89817635	Affx-88809316	T	C	SNP	1	282339	1	469301	ACAGTCGATTTCTTGTCCAACTTCTTTGTCAGAAC[C/T]GTCACCAACTTCTGTTACTCAATCCATTTCACCTG
N	AX-166510756	Affx-88809317	AX-89817651	Affx-88809317	A	G	SNP	1	286516	1	465120	GAGAGGCCATGAAAGTTCAGCCAAAGCACCGGATA[A/G]GACAAGAAGCTCGAACAGTTTCCTGCATGTGGTCA
N	AX-166510758	Affx-88809319	AX-89817657	Affx-88809319	A	C	SNP	1	287687	1	463949	CTTCTTGGTTTAGAAACATACTGCTTCCTCCTACT[A/C]CCTACACTATTTGATCGAATAAGTCTACCAGTCGA
N	AX-166502835	Affx-88809320	AX-89779640	Affx-88809320	T	C	SNP	1	287785	1	463851	GGCGTCAGATGAACATGAAGCATTTAGTGAAAAAT[C/T]AGACTGCAATAACTGCTCATGCCGACGAAGTACTG
N	AX-166510760	Affx-88809321	AX-89817665	Affx-88809321	T	G	SNP	1	291303	1	460324	CGATGCATCAGCTATCTCATCAACCAATGCAAAGG[G/T]TACACTCACATCCACATCCATGGCATTTGAATTAA
N	AX-166520173	Affx-88809321	AX-89817665	Affx-88809321	T	G	SNP	1	291303	1	460324	CGATGCATCAGCTATCTCATCAACCAATGCAAAGG[G/T]TACACTCACATCCACATCCATGGCATTTGAATTAA
Y	AX-123365035	Affx-88809322	AX-89874785	Affx-88809322	T	G	SNP	1	291548	1	460079	AGCAAGTTTTGCTGAATGCAAAACTTGTATATTCC[G/T]GTCCAATTTCTCCGTAATCTCTTTGTAATCATTTT
N	AX-123364860	Affx-88809326	AX-89872282	Affx-88809326	T	C	Indel-SNP	1	296539	1	455082	TGGTGGCATCCTTCCTTTCTTTCTTACCTGTATTT[C/T]GTGTTCAATATTTGAACTTGCTGATTATTTAAAAC
N	AX-123360101	Affx-88809329	AX-89817687	Affx-88809329	A	G	SNP	1	299625	1	451995	GCTCTTGAATTCTTCAAGTTGGTTTTCAGAGCCTT[A/G]TGCCTTTGCTGGGATCGCCAAACACAGGATCTACA
N	AX-166502837	Affx-88809330	AX-89779655	Affx-88809330	T	C	SNP	1	299679	1	451941	CAAACACAGGATCTACACATAGATTGGATTCTTTT[C/T]AGAGGGAGATCTCTTGTTCCTGTTTTGTCTGAAGT
Y	AX-123524214	Affx-88809334	AX-89817689	Affx-88809334	T	C	SNP	1	302250	1	449370	TATCCTTTGTGTTTTTCAGTCTCGGATGAGGAGAA[C/T]AAGCTTTTACCATTAAACTCCGAGTCCACTATAGT
Y	AX-123365039	Affx-88809339	AX-89874808	Affx-88809339	T	C	SNP	1	305088	1	446682	CTCATCAAAAACCAAGCTCCTCCACATGATTCTGG[C/T]GTTCTAGGAAGAAAGTTTCTAGCTTGTCAATTAGG
Y	AX-166509626	Affx-88809340	AX-89806443	Affx-88809340	A	AAATT	Indel	1	305880	1	445890	AGGGACAGATGGAACATCTCAAGGCTTTGCATCCA[-/AATT]AATTGATTCCAAAACAAAACCGATAATAAATATAG
Y	AX-166502844	Affx-88809341	AX-89779673	Affx-88809341	A	G	SNP	1	306886	NA	444881	TTGCCCTCAAGGCCCTGTAAACAAAGGGATGTCAA[A/G]GACTTAGAATCAAGAAGGGGAGAAACAACTTCAGA
N	AX-89862670	Affx-88809342	AX-89862670	Affx-88809342	A	AAATT	Indel	1	306925	1	444842	TAGAATCAAGAAGGGGAGAAACAACTTCAGAGACA[-/AATT]AACCCCGAGCCAGAGTCGCTATCGGAACCGGGTTT
Y	AX-166520188	Affx-88809347	AX-89874832	Affx-88809347	A	C	SNP	1	313927	1	438753	TCTTCCCATGGAAGTCGCTTCTCACTCCCCGCATT[A/C]TATACTCTGTATGTCTCTTTCTCGTCTTTCTAAGC
N	AX-166502850	Affx-88809350	AX-89779695	Affx-88809350	A	C	SNP	1	315046	1	437634	ATTTGCTGTTACTCCATTTCTCAATATCAAGTTTG[A/C]GGGACTGGAGAATTTGCCTCCTCCAGATGTTCCTG
N	AX-123360107	Affx-88809351	AX-89817717	Affx-88809351	T	C	SNP	1	315111	1	437569	TTCCTGCTGTATATGTTTCCAACCACCAGAGCTTT[C/T]TAGACATATATGTTCTTCTCACTATTGGGAGACCC
Y	AX-89817729	Affx-88809354	AX-89817729	Affx-88809354	A	G	SNP	1	319529	1	433195	CTGTCATAGCAACCACATTACGAATGATTGTTGAT[A/G]CTTTCTTCCTTCTTCACATGGCTCTCCAGTTTCGG
N	AX-89779702	Affx-88809358	AX-89779702	Affx-88809358	T	C	SNP	1	320690	1	432034	TGCTCATCGGCTGATGATAATAAGTATTTTGATTT[C/T]GGAATCTACCAACAGGCTTTATCATCTAGAATTGT
N	AX-123357039	Affx-88809365	AX-89779720	Affx-88809365	A	C	SNP	1	327919	1	424799	TCATGCATATGGAACATCTTCTTCTAGGTCGAGCA[A/C]AACTCGATGAAAGTACAAGTCACGCTTCTTTGCCA
N	AX-89817775	Affx-88809371	AX-89817775	Affx-88809371	A	G	SNP	1	334011	1	418704	TGAATATAAAAATCAAACCTGATTAAACTTGGAAA[A/G]CTGATCAACAGCATCATTCCCAACCAGGGCCTCTC
N	AX-166520203	Affx-88809376	AX-89817786	Affx-88809376	T	C	SNP	1	341892	1	410823	ATATTAGTGTTCATGTTGTCTCTAACAACCACCAC[C/T]ATCAATGTGGCAGCGACGGCGAAAGAGCAAGAGCT
Y	AX-166502858	Affx-88809378	AX-89779732	Affx-88809378	T	C	SNP	1	344487	1	NA	GCTGTAACAGACAATTATTATGATAGCATTGGAAC[C/T]GTGGCATATTGGTGGACACATTCTATGATATCTGA
N	AX-166510783	Affx-88809383	AX-89817788	Affx-88809383	A	G	SNP	1	346981	1	406121	TCATCATGATCATCAATAATTCTTGAAACGCGAAT[A/G]ATCTTGTGAATGCCAGTTATCTTATTAAATCCCAT
Y	AX-166520205	Affx-88809383	AX-89817788	Affx-88809383	A	G	SNP	1	346981	1	406121	TCATCATGATCATCAATAATTCTTGAAACGCGAAT[A/G]ATCTTGTGAATGCCAGTTATCTTATTAAATCCCAT
Y	AX-166502859	Affx-88809384	AX-89779737	Affx-88809384	T	C	SNP	1	347021	1	406081	TGTGAATGCCAGTTATCTTATTAAATCCCATGCCA[C/T]AGACTACTTTGGAAATCTTTCCACCTTTTATACCT
N	AX-166510791	Affx-88809394	AX-89817851	Affx-88809394	A	G	SNP	1	374713	1	378466	AACCTTCATCCTTTGACCATACTGATAAGTAATCA[A/G]ACACCAAAAACTCAATAAGCTGGATCCTGTAAGTT
Y	AX-166520217	Affx-88809401	AX-89874986	Affx-88809401	T	G	SNP	1	379163	1	374016	GGTCAAAGTACCCCTTGTTTACATGACGTGCTTTT[G/T]GATTCTCATCAAGCTGTTTACCAATAGTGGTAAAA
N	AX-166502872	Affx-88809405	AX-89779809	Affx-88809405	T	C	SNP	1	385118	1	368059	ATCCCGACTAAGAAAGAGCAGATCTTCTCTACTTA[C/T]TCGGATAACCAGCCTGGAGTTTTGATTCAAGTTTA
Y	AX-89847058	Affx-88809410	AX-89847058	Affx-88809410	A	G	SNP-SNP	1	391303	1	361875	TGCTCGAAATTGAAATTTGAATTTGGTTACGGTTG[A/G]TTTCGGATAGGTCAGCTACGGTGAGGCTTATTGAT
N	AX-166510792	Affx-88809413	AX-89817899	Affx-88809413	A	C	SNP	1	392808	1	360370	CTCTGCTTTGATATTCATAACTATTTGCTGTAGGT[A/C]AAGGTTATTGTCAACTTGAAGGGTCGGGAGAATGA
N	AX-166509134	Affx-88809415	AX-89803248	Affx-88809415	T	TGCA	Indel	1	393138	1	360037	AAGCTCAAGAGCCATCAAAGAAAAAGGAGAACCCT[-/GCA]GTGAATGAAGTATCTTCAAGTGTCTGAATGGGCTC
N	AX-166520222	Affx-88809418	AX-89817910	Affx-88809418	A	C	SNP	1	396181	1	357023	TGCAAGGAAATGGGTACCCTTTTGCAAGAAATTTT[A/C]TATTGAGCCTCGAGCCCCTGAGATGTACTTCTGTG
N	AX-123360127	Affx-88809419	AX-89817914	Affx-88809419	T	C	SNP	1	397325	1	355879	GACTTATGTTCATGTTGAGTAGGAATGGATGATGA[C/T]AAAGAGGTATTGATGTCCCAAATGAATTTCGAAAA
Y	AX-166502877	Affx-88809420	AX-89779823	Affx-88809420	T	C	SNP	1	397505	1	355699	AGTTGTGGTTATGAAGACAAAACTGAATGGGGAAT[C/T]GAGGTAAAAATCTAAACAATATCATTATCACAGTT
N	AX-166510796	Affx-88809421	AX-89817915	Affx-88809421	T	C	SNP	1	398284	1	354920	ACGGGCATTCTTGAGCTGAGATGGAGTGGAGTGAG[C/T]ATTGAAGAATGGTGGAGAAATGAGCAATTCTGGGT
N	AX-166509629	Affx-88809425	AX-89806458	Affx-88809425	A	AAGT	Indel	1	401809	1	351395	CCACACCACTGGTGCTGCTCTATTTGATAGGTTCA[-/AGT]AGTGTTTAACTTATGGTAACCAAAACTTCGAGGGG
N	AX-166502883	Affx-88809437	AX-89779845	Affx-88809437	A	C	SNP	1	414932	1	338272	CCCGAAACTGAACTCTGATCTACTTCTTTCAAGTC[A/C]TGTATAATACTCGTCAAATCTCTAGATTTCCTGGC
N	AX-89779846	Affx-88809438	AX-89779846	Affx-88809438	T	C	SNP	1	415275	1	337929	AGTTAACACACACCTTCCTTGCATCAAAAGATTTC[C/T]GAACCACCGTGAACGCCTCCGACGGCAGCATTGAA
N	AX-89779866	Affx-88809439	AX-89779866	Affx-88809439	T	C	SNP	1	420742	1	332460	TAATCCCTCATTGTTTTACAGATTCTTGGCAACTC[C/T]GCTTTGAAGATGGAGGTTGAGGTTCCTGTGGATTA
N	AX-166502889	Affx-88809441	AX-89779875	Affx-88809441	A	G	SNP	1	423082	1	330120	TCTGCTGTGAAGATGGAGGCCAATCAATACAAGAG[A/G]CTGGCTGAGGAAAAGATCTGTCATGCTGAGGAAGC
N	AX-166502890	Affx-88809444	AX-89779877	Affx-88809444	T	C	SNP	1	423790	1	329412	GAAAGGGAGGCAATTACTAGTACTTCATGCTCAAC[C/T]GGCGTCCATGATGTTTTTGAAGTTCCACAGAGCTA
Y	AX-123360132	Affx-88809446	AX-89817965	Affx-88809446	A	G	SNP	1	424180	1	329022	ACTGAAATAAGTCATACAGGAGAAGAGGAGTTGAG[A/G]TTGTTCAGGGATATACGCGAGCAACTTACCTTAAT
N	AX-166502891	Affx-88809448	AX-89779880	Affx-88809448	A	G	SNP	1	426081	1	327121	CATTCCTGTAAGCTTGAACCTTTGTGAAAATCAAC[A/G]TCTGTTGGCCGCCTTCCTGTAACAATTTCTAAGAG
Y	AX-166502892	Affx-88809451	AX-89779882	Affx-88809451	A	C	SNP	1	426664	1	326538	CTAATCAAATTTCTGTGTCTGGTTCTCTTCAGGAC[A/C]TGGCATTCCCTTTTAAAGCTTCCAGAAATCTCTTC
N	AX-123524227	Affx-88809455	AX-89817981	Affx-88809455	T	C	SNP	1	427720	1	325482	ATGCCACCAAGTTCAGATGGAATCTCACCAGAGAG[C/T]GAATTATTCGACAGATATACCCGTTCCAGCTTTCT
N	AX-166510811	Affx-88809457	AX-89817983	Affx-88809457	A	G	SNP	1	427843	1	325359	TTCAAGAGGGTGAGGTTGACAAGGTTTGAAATGTG[A/G]GGAGGGATTGAACCATAAAGGAGATTATCATCTAA
N	AX-123457537	Affx-88809458	AX-89875109	Affx-88809458	T	C	SNP	1	427868	1	325334	TTGAAATGTGAGGAGGGATTGAACCATAAAGGAGA[C/T]TATCATCTAAATGAACTTGAACAAGATTGGTCGAA
N	AX-166510814	Affx-88809462	AX-89817992	Affx-88809462	T	C	SNP	1	434099	1	319367	AATCTCTGCAACTGCAACTCACAGCTGGAGAAGAC[C/T]TCCCAAACTCAACCCCACCAAGTCCCTCAAAACCC
Y	AX-166510815	Affx-88809465	AX-89817995	Affx-88809465	T	C	SNP	1	435094	1	318372	GGAAACGTGTAAATGGTTTGATTAGAAGGAAAAGA[C/T]TGGTGGAGGTGCAAAAACTGCTGAAAAAAGAAGAT
N	AX-166520239	Affx-88809465	AX-89817995	Affx-88809465	T	C	SNP	1	435094	1	318372	GGAAACGTGTAAATGGTTTGATTAGAAGGAAAAGA[C/T]TGGTGGAGGTGCAAAAACTGCTGAAAAAAGAAGAT
N	AX-166510817	Affx-88809467	AX-89817998	Affx-88809467	A	G	SNP	1	435301	1	318165	ATATTTCAGCTGGGAAGTCGTTTGATAGAACTATT[A/G]ACAGAAACAGCTCATGTGCAACCTCCACTTGACCA
Y	AX-166520240	Affx-88809468	AX-89818001	Affx-88809468	A	C	SNP	1	436042	1	317424	TTGTTCATCACAGGCTAAACATATGTTGATTCCTT[A/C]TGTGCCAATGTTGGTGCCTCCCAAAAGATGGAAAG
N	AX-166520243	Affx-88809470	AX-89875135	Affx-88809470	A	C	SNP	1	437122	1	316344	TGAAGGACGAGGATGGCTTTTATTATCCCCACAAT[A/C]TTGATTTTCGTGGCCGAGCATACCCAATGCATCCC
N	AX-166510820	Affx-88809472	AX-89818009	Affx-88809472	A	C	SNP	1	437759	1	315707	TTTGAAGAGTGCATTAACAGCAGTTTCTAAATCTT[A/C]TAGGATGGTTCATGCAATGGCTTACAGCATTATGC
N	AX-166520244	Affx-88809472	AX-89818009	Affx-88809472	A	C	SNP	1	437759	1	315707	TTTGAAGAGTGCATTAACAGCAGTTTCTAAATCTT[A/C]TAGGATGGTTCATGCAATGGCTTACAGCATTATGC
N	AX-166502900	Affx-88809473	AX-89779905	Affx-88809473	T	C	SNP	1	438404	1	315062	GCCAGGGTACATGACATAATGAAAAGAGACAGCAA[C/T]AAGGACCCAACTACCAACCCAAATGCTTTATTGGC
N	AX-166518628	Affx-88809475	AX-89860602	Affx-88809475	T	TGAA	Indel	1	440540	1	312923	GTTCAACTATGGCTGCTTTAATGCAACTAAGGAGT[-/GAA]GAAGATTTTAGAAAGAATAAAAGTGTTCAGTGAGA
N	AX-166510823	Affx-88809477	AX-89818017	Affx-88809477	T	C	SNP	1	442093	1	311373	ACCATTTTCTCTCATTTCCTTGAGCAAATAGACAG[C/T]ATCTTCAACCATTCCTGCAATTCCATATGCCTTGA
N	AX-166510825	Affx-88809479	AX-89818023	Affx-88809479	A	G	SNP	1	443000	1	310466	TCAATCATTGTGCACATGATGTGCATGTTTGGCTT[A/G]CCATCATGTTTGGGCATTTGATTGTATATTGTCAC
Y	AX-166520248	Affx-88809479	AX-89818023	Affx-88809479	A	G	SNP	1	443000	1	310466	TCAATCATTGTGCACATGATGTGCATGTTTGGCTT[A/G]CCATCATGTTTGGGCATTTGATTGTATATTGTCAC
N	AX-166502903	Affx-88809481	AX-89779915	Affx-88809481	A	G	SNP	1	443189	1	310277	AAGCCGTGCTTCACATAAGACATGACAAGACTCGA[A/G]CAAGAAGTCCGGCTGACAAGAACATGTTGATATAA
N	AX-166502906	Affx-88809486	AX-89779933	Affx-88809486	T	G	SNP	1	445972	1	307493	GAAATAACATTACGTTGCTACAAGAATGTATGTGC[G/T]CATGGAGATATGCATTGGCTCTTGTATCCTTATAC
N	AX-166510830	Affx-88809488	AX-89818046	Affx-88809488	T	G	SNP	1	449584	1	303726	ATGGAGATGCAGAGGATCCAGATGTGGAGAATGTG[G/T]CCCTGAAAGAACAAGAAAAACTGAAAAAGTTGAAT
N	AX-166520257	Affx-88809493	AX-89818067	Affx-88809493	A	G	SNP	1	454113	1	299185	AAGAGTAAGGATTCAAATACAGTGTCTTCCCATCA[A/G]CCTGAATATGAAATGGGCCAACTTCCTCTGCCATC
N	AX-166520258	Affx-88809495	AX-89875199	Affx-88809495	A	G	SNP	1	454308	1	298990	AGCCAAAGAACAAGGGGCTTAGAAGTAGGGTCCTC[A/G]GCAGCCTCAACAAACCAGTAGAAGAGAGCCCTCCC
Y	AX-123357063	Affx-88809497	AX-89779960	Affx-88809497	A	G	SNP	1	456611	1	296687	GGTGAAGGACTGATTTCCTCCAGAATAGCCTCAGC[A/G]TCCTGAAATGAAAATCTAAAAAAATGTAATGTACC
Y	AX-123614511	Affx-88809498	AX-89806477	Affx-88809498	A	AACT	Indel	1	456913	1	296385	GAAATTAGAAGAACAAGCAGCATCCAAAAGTGATA[-/ACT]ACTACCTCATTGAGTATGGTAAGTGTTGTCTCAGG
N	AX-166510840	Affx-88809499	AX-89818075	Affx-88809499	A	G	SNP	1	456970	1	296328	AGTGTTGTCTCAGGTTTGAGTTCTTTAATTCGAAG[A/G]CCATCTTTCACCCAAGATCGAAAGCCACCTTGAAC
N	AX-123389588	Affx-88809504	AX-89779979	Affx-88809504	A	G	SNP	1	462149	1	291142	AAGCATTACTTTTGTGAGGCAAGGGACATCACTAG[A/G]CCATTTCCCAGCCGAATGTGCTTGCGTGAACCTGA
N	AX-89875223	Affx-88809507	AX-89818085	Affx-88809507	A	G	SNP	1	463155	1	290136	TGTATCAACTTGCTTAGGAATGGAGAAGGAAAGTC[A/G]GAATCCATTTTAGTACAGCATTTTGAGGAATCTTT
N	AX-123357067	Affx-88809508	AX-89779982	Affx-88809508	T	C	SNP	1	463200	1	290091	TTAGTACAGCATTTTGAGGAATCTTTAAACTACAT[C/T]AGATCAACAGGAAAACTTCCTTATACTCGAATTCA
N	AX-166510843	Affx-88809509	AX-89818086	Affx-88809509	T	C	SNP	1	463278	1	290013	AATTATGACTGGCATGCAAGTACAAAGTTAAAAGG[C/T]GAACAGCAAACTATTGAAGGATTATGGAAACATCT
N	AX-166510844	Affx-88809512	AX-89818089	Affx-88809512	A	G	SNP	1	463511	1	289780	TTCTTTGGATAGAACAAATGCTGCAAGTTATTTTG[A/G]CTCTCTCCAGGTTTTTGTGGAGCAATGTAGGAGGC
Y	AX-166502918	Affx-88809517	AX-89779990	Affx-88809517	T	C	SNP	1	466621	1	286670	AATGAGATTGTGCTTGATGCTTTGATATTGGACTA[C/T]GTTAGGGTTTTGGTAAGCATGAGGAGAAGTTCCCG
N	AX-166502919	Affx-88809518	AX-89779991	Affx-88809518	A	G	SNP	1	466746	1	286545	CGATGGTCTTTCTGAGAGTAATCAGTCTTCTGAAA[A/G]GAGATCCATTAAATCTCTGCGACAAGTACTTGATG
N	AX-166510849	Affx-88809521	AX-89818103	Affx-88809521	A	G	SNP	1	467896	1	285395	AAGGAAGAAAGGTCATGCATGGGAAAATGGGATGT[A/G]CAGTCCATGATCACGTCTTCCTCAGAATATTTCGG
Y	AX-166520265	Affx-88809521	AX-89818103	Affx-88809521	A	G	SNP	1	467896	1	285395	AAGGAAGAAAGGTCATGCATGGGAAAATGGGATGT[A/G]CAGTCCATGATCACGTCTTCCTCAGAATATTTCGG
N	AX-166510851	Affx-88809522	AX-89818105	Affx-88809522	T	C	SNP	1	468475	1	284816	TCTCCTGCTTCACCTTTGCTTGCTGGGTTTCGTCT[C/T]GATGCTTTTGGTGCAATAAAACCTTTGGTTACCCA
N	AX-166510853	Affx-88809524	AX-89818107	Affx-88809524	T	C	SNP	1	470554	1	282737	GGAAAGGCTTCTGATAAGTGTTCTGGAGCTTGATC[C/T]CTTTGGGAAAATCAAACAAGTCGTCCAAGCTACCA
Y	AX-166520266	Affx-88809524	AX-89818107	Affx-88809524	T	C	SNP	1	470554	1	282737	GGAAAGGCTTCTGATAAGTGTTCTGGAGCTTGATC[C/T]CTTTGGGAAAATCAAACAAGTCGTCCAAGCTACCA
Y	AX-166502920	Affx-88809525	AX-89779994	Affx-88809525	A	G	SNP	1	470630	1	282661	GCTGTTGTGAAGCTCTAGACAGTCTGCATCTGACA[A/G]TGTTGCCACAAAGCAACCGTAGTCTTCGAGTGCGT
N	AX-166509631	Affx-88809526	AX-89806482	Affx-88809526	T	TAGC	Indel	1	471086	1	282205	CTCCATAGTCCATACAACATACGTTTGAGTTAACT[-/AGC]AGTTGACACAATGAAATTTGTATTAGCTCCCGCAC
Y	AX-166518997	Affx-88809526	AX-89806482	Affx-88809526	T	TAGC	Indel	1	471086	1	282205	CTCCATAGTCCATACAACATACGTTTGAGTTAACT[-/AGC]AGTTGACACAATGAAATTTGTATTAGCTCCCGCAC
N	AX-166502924	Affx-88809531	AX-89780005	Affx-88809531	A	C	SNP	1	473730	1	279561	TTACCTACGAGGAAAGGAAGAACAAATTGATTGAG[A/C]GATTGAATGCCTTCAACTCAGCTGCCCATGCTGAT
N	AX-123357080	Affx-88809540	AX-89780060	Affx-88809540	T	C	SNP	1	496712	1	256076	TCGGCATCCAGTTGAGCCCTGTATTCTCTCATCAT[C/T]CTATCGGTATCTTTTTCCAGTTCCCCCTTTCTCAG
Y	AX-166520269	Affx-88809544	AX-89875289	Affx-88809544	T	C	SNP	1	502367	1	250075	GAGAGAGTTGTTCCCGCGAATGTGCAGAGTTCCCC[C/T]GACTTTTTGACACAGATGAAGCAGTCTCTGTTGAG
Y	AX-166510859	Affx-88809546	AX-89818157	Affx-88809546	T	G	SNP	1	503460	1	248982	CTTTTAAGCTTGGCCCAGCTGAGAAATTTCTGAAG[G/T]CAGTGCTTGATGTACCTTATGCATTTAAGAGGGTG
Y	AX-166510860	Affx-88809550	AX-89818158	Affx-88809550	T	C	SNP	1	504695	1	247747	AGATTGTGATGATTCAAGCTAGAGAGAAACTTGCA[C/T]TCTGCATGGTAAAGGAAATAACAGAATATTTCCAT
N	AX-166510863	Affx-88809552	AX-89818176	Affx-88809552	A	G	SNP	1	510505	1	241935	CTGCCACATGCGTTTGCAGTGAACACAGCCACCAG[A/G]TACCCGGGTTTTACAGCTGGAAAAATGACGAACTA
N	AX-166520273	Affx-88809552	AX-89818176	Affx-88809552	A	G	SNP	1	510505	1	241935	CTGCCACATGCGTTTGCAGTGAACACAGCCACCAG[A/G]TACCCGGGTTTTACAGCTGGAAAAATGACGAACTA
N	AX-166510864	Affx-88809556	AX-89818178	Affx-88809556	T	C	SNP	1	511206	1	241234	TGCTCAAGAAAGTATATACAAACTCTCTTCAGTGA[C/T]GGAACTGAGTAGGAGTGCGACAAAACCAACAAATG
N	AX-123614964	Affx-88809557	AX-89862703	Affx-88809557	C	CATTA	Indel	1	516851	1	229037	AACACTTAGGTTTTGAGTATCTTATTCTAGCAACC[-/ATTA]ATTACCACAAATAACAAGATCGAAAAGAATATTTG
N	AX-166502942	Affx-88809559	AX-89780091	Affx-88809559	T	C	SNP	1	520939	1	NA	GGGCCAACGATTCCATCTGCATACTTGGACAATAG[C/T]ATCAGAGACGACAAGGATTATGGGGTTCATCTGTT
Y	AX-123614514	Affx-88809561	AX-89806486	Affx-88809561	A	AACGT	Indel	1	522205	1	223646	GCAACCCAAAAATATCAGACCAAATAATCCAGGCA[-/ACGT]ACAACGAGTTCGAATAAAGTCATAAACACGTTTCT
N	AX-89860616	Affx-88809562	AX-89803281	Affx-88809562	T	TTCGA	Indel	1	522410	1	234623	ATAGCTTCACATGCAGTAGTGATCATCGATCACTT[-/TCGA]TCTGCTGAGTGCTGACAGTAACAGCTTGATGATAA
Y	AX-166520285	Affx-88809564	AX-89875351	Affx-88809564	A	G	SNP	1	524987	1	NA	TACGTAGCCATCTACCAACACTTTCTTCAAGGAGC[A/G]CTAAAGATTCCCTCAGAAAATGATCGGTCCACTAC
N	AX-166517603	Affx-88809571	AX-89847085	Affx-88809571	A	T	SNP-SNP	1	531359	1	215639	GAAGCTAGGCCGGAAAATTGATGCAACAATATGAT[A/T]GAGATGTTTTGTTATTTAGTTTTCTGAAAGAACAT
N	AX-166520299	Affx-88809572	AX-89818250	Affx-88809572	A	G	SNP	1	535710	1	211288	TTTGCATCTTCACTCCGACTTCCTAACTTGACAAT[A/G]TCTTCCACAAGAATTTTACCATCTGCACCACAGGT
N	AX-166502951	Affx-88809575	AX-89780124	Affx-88809575	T	C	SNP	1	540154	1	206844	GGCAGCAAGAACTCCATGAAAGGAACAATGATAAA[C/T]ACAGCGAATGGAACTAGCCGAAAGATATCAGCTGT
N	AX-166502952	Affx-88809576	AX-89780125	Affx-88809576	T	G	SNP	1	540826	1	206172	TTGTCGTCATCGTTGGAGCTCCGATTGTGAAAATG[G/T]GCGAGGCACTGGGTTGTGCGGGAGGAGGAAGTGAC
N	AX-166510890	Affx-88809582	AX-89818285	Affx-88809582	A	G	SNP	1	550492	1	196498	CCCTCTTCACCATTGTCGTTTCTGGCACCGATACC[A/G]TCTTACGCCAAGTCATTGAGCAGCTTCACAAGCTC
N	AX-166518635	Affx-88809587	AX-89803290	Affx-88809587	C	CCGG	Indel	1	555115	1	191871	AATGATAATAACTAAAAGCAACAAAACCTTGCATC[-/CGG]ACCTCTTTGGCGATCAGTGACGTTAAGTTGTGCAC
N	AX-123365070	Affx-88809588	AX-89875440	Affx-88809588	T	C	SNP	1	557130	1	189859	TGCAAAGAGTCCAACCAGAGCCGATGGTGCGCTCT[C/T]GAGGCCTTCAACTACATCTTCTACGTATGTAACCT
Y	AX-123365073	Affx-88809596	AX-89875483	Affx-88809596	A	G	SNP	1	573382	1	173600	GCTGGACAATAAATTTCTCATTTTTGTCACGTTTG[A/G]TTTCTTCAATGCGAATAATGACAGTAGCAAGGGCC
N	AX-166502969	Affx-88809599	AX-89780202	Affx-88809599	T	G	SNP	1	577559	1	169422	CATCTAAATCATTTTCCTCCTTGTAATTGAAAGCC[G/T]CGTCAAACCCCAACTTGTTCTTTAGTAGATCGACC
N	AX-123360181	Affx-88809601	AX-89818356	Affx-88809601	T	C	SNP	1	578020	1	168961	GGTGTATTTTAACGAGTGAGGTTTCAGAGACGACG[C/T]CTGTGATGAGGCTGTACTCTTCCCATGTGGTTAAC
N	AX-166520320	Affx-88809603	AX-89875500	Affx-88809603	T	C	SNP	1	579847	1	167134	CAAATGCATCAAGTTGGTGACCCCTTCATGCTGCT[C/T]GTTATTGTACTGCGAAATCATGCCGCACACGGCAA
N	AX-166510905	Affx-88809604	AX-89818364	Affx-88809604	A	G	SNP	1	579878	1	167103	TGCTCGTTATTGTACTGCGAAATCATGCCGCACAC[A/G]GCAATGCGACCGTGAAGTCTCATGTTGAGAAGCAC
N	AX-166510906	Affx-88809605	AX-89818366	Affx-88809605	A	G	SNP	1	579973	1	167008	GTTCTCAAAGTAAATGTCTATGCCCTCTGGGAAGT[A/G]CCTCTTCAAAGCGGCATCCAAGTCGGGCTCTTCCT
N	AX-166518999	Affx-88809608	AX-89862714	Affx-88809608	G	GTATA	Indel	1	581062	1	165919	ATCACCGCCTGCAACCTTATAGTCAGTACTACTAG[-/TATA]TATTGACAGCAGCTGCCATTGATCCTAGGCTTTCG
N	AX-166520332	Affx-88809611	AX-89818397	Affx-88809611	T	C	SNP	1	592501	1	154057	TGAGGAGGGTGTTGTTTGGTGGACTGGTGAAGGTG[C/T]GACTTGATGAATTTGTGGTCGGAGATGAGATTAAG
N	AX-123357104	Affx-88809614	AX-89780243	Affx-88809614	T	G	SNP	1	592650	1	153908	AGGAAGATCTTTGCTAGCAATGGAAAATGAGCTGC[G/T]GCTGTTGCTTGTTTCCATTTTAATTGTGAGTTTGG
N	AX-123494758	Affx-88809615	AX-89780250	Affx-88809615	A	G	SNP	1	599482	1	147007	GGGCAGCCTTTGTTGTCGGGACAATATTTTTGATC[A/G]ACGACGACCGGATTTTGAACGTTGTTCATGACACA
N	AX-123365075	Affx-88809616	AX-89818413	Affx-88809616	T	C	SNP	1	599641	1	146848	ACTGTTTTCACCGTTACATTTTGCACACCAGCTTC[C/T]TTTAGGTCTTTGCCAAGACTCCCGATGCTGTACCA
Y	AX-166519000	Affx-88809621	AX-89862717	Affx-88809621	C	CTGCA	Indel	1	602677	1	143812	AATTCGGTTACAGAATTAGTTTGTTTTCCCCGCGC[-/TGCA]TGCAGTTATATATAGGCCGGCCGGCATTCCTACCC
Y	AX-89806503	Affx-88809624	AX-89806503	Affx-88809624	G	GGCAT	Indel	1	603492	1	142999	ACGATTGAAAGTGCTTGAATAGGCGAAAATTAAAG[-/GCAT]GCATTGCGGCAAGAACATGCAATTATTTCATTATA
N	AX-166520340	Affx-88809629	AX-89818440	Affx-88809629	T	G	SNP	1	611523	1	134967	TCTGCTTCTTCATGTTCGGGTTATCGGATGCAGCA[G/T]CAACTTATAATGTGATGAAATACGGTGCAAAAGCG
N	AX-166502989	Affx-88809630	AX-89780280	Affx-88809630	A	C	SNP	1	612018	1	134472	TATGTGCAGTCGATAACGTTCAATTGGGCAAATGA[A/C]GTTGTGATAAGTGGTTTAGTGTCGATCAACAGTCA
N	AX-166510925	Affx-88809631	AX-89818442	Affx-88809631	T	C	SNP	1	612122	1	134368	TGTGGTGGTCAGAAACGTTAAGTTGGTTGCTCCGG[C/T]TGACAGCCCCAATACTGATGGCATTCATGTGCAGA
Y	AX-89818444	Affx-88809633	AX-89818444	Affx-88809633	T	C	SNP	1	612791	1	133699	CAGACTTCTGGTGTAAAGATTAGTCAAGTGACATA[C/T]AAGAACATACAAGGGACGTCGGCAACGGCGGAGGC
Y	AX-166502990	Affx-88809636	AX-89780282	Affx-88809636	A	C	SNP	1	615790	1	130700	CAGATTAACTGCTGGAATTGATAATATGGAGAGAC[A/C]AAGCAGTTTTCGAACAGCAAGGATAGAAAAACAAG
N	AX-166520341	Affx-88809638	AX-89818446	Affx-88809638	T	C	SNP	1	616750	1	129740	GAAGTTGTCAAATCCCTACTAAGCAAGGATCCGAC[C/T]GCTGCTTTTAGAACAGACCTCAAAGGCCAAACTGC
N	AX-166510926	Affx-88809640	AX-89818448	Affx-88809640	T	C	SNP	1	618051	1	128439	ACAATCATGCTCACTACTATTGGTTCCATGTGCTA[C/T]TGTGTCATCTTACACAGGATGGAGGAGTCCAAATA
Y	AX-123365080	Affx-88809642	AX-89875594	Affx-88809642	T	C	SNP	1	620936	1	124878	GGCGTAGTACCGGTACTCCGGTAGAGTCGCGGTGC[C/T]AAGTGTTGCTGAAGCTCACTAACAGCTTCCCCTTG
Y	AX-166510927	Affx-88809643	AX-89818458	Affx-88809643	T	C	SNP	1	621596	1	124218	TTTCTCCTTAAAATATCCAAATCCAAGTCCGAAAC[C/T]GATCAAGTAGACCTCTGCGCTGATATTGTTGCTCA
Y	AX-166510928	Affx-88809645	AX-89818460	Affx-88809645	A	G	SNP	1	622141	1	123673	GAGTGTGAAAAAGAATCAAGAAGAGCCTGTGCAGC[A/G]CCAATTGGAGGTGAGTATATTTGATGGCCATCTCA
N	AX-166502996	Affx-88809650	AX-89780302	Affx-88809650	T	G	SNP	1	627079	1	118735	CATAAGTGCATTGTCTTTCATCTTTCAAGGGTAGA[G/T]CCTCACAACCAGGTCTACAAAGGGGAGAAGACAAA
Y	AX-123357113	Affx-88809651	AX-89780303	Affx-88809651	A	G	SNP	1	627200	1	118614	TCCACCTGGAGAAATGGAAGTGTTCCTCCTGCTAC[A/G]GCAAGTACTACTTTCCAAGTGGTTATTGGGGGACA
N	AX-166520345	Affx-88809653	AX-89875609	Affx-88809653	T	C	SNP	1	627608	1	118206	CTCTGGAGACACAGAGGCCTGAACAGGAGGAGTTG[C/T]ACTATCACTTTTGTTAGAATTTTCTTCCACATTCC
N	AX-166502997	Affx-88809655	AX-89780305	Affx-88809655	A	G	SNP	1	627645	1	118169	CTATCACTTTTGTTAGAATTTTCTTCCACATTCCT[A/G]TCGACTTTGCATCCCAAACCTAACCCAGTAGGTTT
Y	AX-166502998	Affx-88809656	AX-89780306	Affx-88809656	A	G	SNP	1	627729	1	118085	GTAAGAGTTCCATCACCAGCACCTGATTTAAGCTC[A/G]TTGGACTGACCTTTGAGTTCAAAGGAACAACCTTT
Y	AX-166502999	Affx-88809657	AX-89780309	Affx-88809657	A	G	SNP	1	629626	1	116188	AGGCTATACAACTAGATCCTGCATTTGCAAAGAAC[A/G]TTGGGCAGATTGTTCTTCTTGGTGGCGCTTTTGCA
N	AX-166510934	Affx-88809663	AX-89818494	Affx-88809663	T	G	SNP	1	634489	1	111325	TGACCCACTTAACTCTATTTATCCTGTATTGGATC[G/T]ATTGAAAATCCAACAGATTCTACTTGCATTGGAGG
N	AX-166520349	Affx-88809663	AX-89818494	Affx-88809663	T	G	SNP	1	634489	1	111325	TGACCCACTTAACTCTATTTATCCTGTATTGGATC[G/T]ATTGAAAATCCAACAGATTCTACTTGCATTGGAGG
N	AX-166503001	Affx-88809664	AX-89780315	Affx-88809664	T	G	SNP	1	634543	1	111271	TCTACTTGCATTGGAGGATCTCAAAACTGGAAGTC[G/T]CCGTGCAATTAGGGGGCCCCATTATCTCAAGGTTC
Y	AX-123360198	Affx-88809665	AX-89818495	Affx-88809665	T	C	SNP	1	635050	1	110764	GTTTATATCGAAATGTGCAGGTTGATGATTTTAAC[C/T]AGTCTGGTTTAACTCAAATGCTATCTGAAGCTAAA
N	AX-123524259	Affx-88809665	AX-89818495	Affx-88809665	T	C	SNP	1	635050	1	110764	GTTTATATCGAAATGTGCAGGTTGATGATTTTAAC[C/T]AGTCTGGTTTAACTCAAATGCTATCTGAAGCTAAA
N	AX-123357115	Affx-88809668	AX-89780319	Affx-88809668	A	G	SNP	1	638793	1	107021	CAAACCTCAAATAATAATTCTTCCTCAGCATCCAG[A/G]TCAGCAAAAGCAGATGGCATGCATTTCAGTAACAA
N	AX-166503007	Affx-88809671	AX-89780338	Affx-88809671	A	G	SNP	1	649298	1	96509	TGCTACAAAGATGGAAAAAGGGTTGAAGGGGAAAA[A/G]AGAAGAAGATTTGAAGAATTCAAAGATGATGGATG
N	AX-166520353	Affx-88809673	AX-89818528	Affx-88809673	T	C	SNP	1	652288	1	91526	GGGCTCTGTTTTTCTGTACTGGTATAGTGGCTTTG[C/T]GGACATATGGGAAGAGATCAAGATATAGACAATCG
N	AX-166503009	Affx-88809674	AX-89780346	Affx-88809674	A	G	SNP	1	652315	1	91499	TGGCTTTGCGGACATATGGGAAGAGATCAAGATAT[A/G]GACAATCGATCAACTGAAGACAAGAGTGGCATGCA
N	AX-166520373	Affx-88809692	AX-89818612	Affx-88809692	T	C	SNP	1	668903	1	74904	TGATCTAATTATTCTTTTTCTTCCCTCTCAGGTGG[C/T]CTGGGTTCCTGGTAGCTTTGAAATTGGTGTAGTTG
Y	AX-166510957	Affx-88809695	AX-89818628	Affx-88809695	A	G	SNP	1	673633	1	70517	TTAATTTATTCATACCAGAGTGTGGCAGCTATTGT[A/G]TTTGGGGATGGGCCAGAATCACAACTTCATCCATT
Y	AX-166503022	Affx-88809699	AX-89780413	Affx-88809699	T	C	SNP	1	674485	1	69665	TTTCCTGAGGCAAATGACATTAGGAGTGAAGTGAT[C/T]CCAGGTGCCGTATCTCTTGGAATGAAGGTCTTGCC
N	AX-166503023	Affx-88809703	AX-89780415	Affx-88809703	A	G	SNP	1	677123	1	67027	AACCAACCTACATCCAAGCTGCTTCAAGAAACTGA[A/G]GGCATGGATTGGTGTTTGAGGGCAAGAAAGACTGC
N	AX-166510960	Affx-88809709	AX-89818643	Affx-88809709	T	C	SNP	1	683060	1	61090	TTATCTGAGTCGGCCACTGCCGTTGTTGTTCTTGT[C/T]CACTGGCGGCCCTTGGGCATTCGGGTAAGAAGATT
N	AX-166510963	Affx-88809711	AX-89818653	Affx-88809711	T	C	SNP	1	687201	1	56414	AAGAAGGCTATGGCATTACCCTCTTCCACAAGACA[C/T]TCCATGGTACCAATCTTGCAGTAGTGGGATGCAAA
N	AX-166503028	Affx-88809715	AX-89780447	Affx-88809715	A	G	SNP	1	694233	1	49398	TGCCCGCAAGTTCTTCATATATGTTCAAGATTATA[A/G]TGAAAGTGATCCCAGAACACACGAGGGAATGGACT
N	AX-166510967	Affx-88809717	AX-89818674	Affx-88809717	A	G	SNP	1	695019	1	48611	TGGGGCTTTATGCAGGCATTTGCAAGACTTAGTGC[A/G]GTGTATGGTGGCACTTATATGCTTAATAAACCTGA
Y	AX-166520380	Affx-88809717	AX-89818674	Affx-88809717	A	G	SNP	1	695019	1	48611	TGGGGCTTTATGCAGGCATTTGCAAGACTTAGTGC[A/G]GTGTATGGTGGCACTTATATGCTTAATAAACCTGA
N	AX-166520381	Affx-88809718	AX-89818675	Affx-88809718	T	C	SNP	1	695218	1	48412	GAGTTTTCTCCTGCCTGATCCCAGGTGGAGTTCAA[C/T]GAGGAAGGGAAAGTTATTGGTGTTACATCTGAAGG
N	AX-89862740	Affx-88809721	AX-89862740	Affx-88809721	T	TGCGC	Indel	1	698772	1	44842	CAAGTTTCCCCGATGTTGTGTTGGACACAGAAGTT[-/GCGC]GCCTCTTCTTTGTGCAATTTGTATTTGCTGCTATG
Y	AX-123614523	Affx-88809724	AX-89806531	Affx-88809724	A	AATAT	Indel	1	702554	1	41060	TCAATAATGGAGCAAGTTAATTAATTGGTTGAACA[-/ATAT]ATACTGATAATTTCACAATACAGAAATTTAATATC
Y	AX-166510976	Affx-88809730	AX-89818730	Affx-88809730	A	C	SNP	1	717523	1	26100	AGATCATAAATGAGAAGCTGGGGAAAATTAACACA[A/C]AGGGTTTCCTTACCATCAACAGCCAACCAGCAATA
N	AX-166520390	Affx-88809730	AX-89818730	Affx-88809730	A	C	SNP	1	717523	1	26100	AGATCATAAATGAGAAGCTGGGGAAAATTAACACA[A/C]AGGGTTTCCTTACCATCAACAGCCAACCAGCAATA
N	AX-123365097	Affx-88809732	AX-89875861	Affx-88809732	A	G	SNP	1	718644	1	24979	GATGTGAATGCGGTAACATGGGGAGTCTTCCCAGC[A/G]AAGGAGATAATCCAACCGACTGTTGTGGATCCTGC
Y	AX-166503041	Affx-88809733	AX-89780503	Affx-88809733	T	C	SNP	1	719840	1	23783	GAGATATTTGCATGTTTTAGAGATCTGCAGATAAT[C/T]ACACCTGCAGAAGTCCGCATTATCTGCACCCCAAG
N	AX-89780504	Affx-88809735	AX-89780504	Affx-88809735	A	G	SNP	1	721221	1	22402	AGAAGCTCAACTTTTTCATGGGAGGCATCAGAAGC[A/G]GCCATTAGCATTCCACAAGACTTGACACCCCGCAT
Y	AX-166510979	Affx-88809737	AX-89818746	Affx-88809737	A	G	SNP	1	724744	1	18877	ATTGAGATTACAACAGGTCCTACTCCTCCTGGAAC[A/G]GGAGTTATGGCTGACACCACCTTGATTGCCTCTGT
N	AX-166520394	Affx-88809737	AX-89818746	Affx-88809737	A	G	SNP	1	724744	1	18877	ATTGAGATTACAACAGGTCCTACTCCTCCTGGAAC[A/G]GGAGTTATGGCTGACACCACCTTGATTGCCTCTGT
N	AX-89875872	Affx-88809741	AX-89875872	Affx-88809741	A	G	SNP	1	727006	1	16613	AGAAGACAGCGGGCGACCGAGACCGAGAGGGATCG[A/G]CCATGACGATGAGAACGTCGTCGTCGAATACAAGC
N	AX-166520481	Affx-88809748	AX-89819144	Affx-88809748	T	G	SNP	1	876409	1	22737832	CTTATGTTAACATGTCAGGCTACTAATGAAAATTT[G/T]CCACCAAATGTGATCAAGCAACTTGCGAAGGAATT
Y	AX-123365128	Affx-88809749	AX-89819145	Affx-88809749	T	C	SNP	1	876457	1	22737880	ATCAAGCAACTTGCGAAGGAATTGAAGAGTCTTGA[C/T]GAATCCCCTCCTGAAGGCATTAAAGTTTGTGTGAA
N	AX-166520482	Affx-88809750	AX-89819148	Affx-88809750	A	G	SNP	1	879738	1	22741168	TATAATTATAGGAGTTTCCAGATGGGAAGTTCCCT[A/G]CTGGTGGAAAATCTGACATAGAAGGCATCTTCCCA
N	AX-166520483	Affx-88809751	AX-89876270	Affx-88809751	T	C	SNP	1	880044	1	22741474	TACATAACAGGCAAAGGCCCCTTTGATGGTTTGCT[C/T]GGGTTCTCTCAGGTAATGATATACACGACATTAAA
Y	AX-166517619	Affx-88809755	AX-89847172	Affx-88809755	A	G	SNP-SNP	1	884254	1	22745684	CCATACATATAACAGGGAACATAAGCAACAGAAAC[A/G]GCAATTTTAGTCACTACTAACTGATCCCCACAAAG
N	AX-166526667	Affx-88809756	AX-89904317	Affx-88809756	A	G	SNP-SNP	1	909536	1	22770721	TTCGGACACGGTTTTGATTTTTTTCGGCCCGGACC[A/G]ACCTGAACGCAACCCTATCTCTAACCACATAAATT
Y	AX-166503153	Affx-88809760	AX-89780912	Affx-88809760	T	C	SNP	1	981345	1	22849410	ACTGTCTTGGCACCCTATAAAGTATGCCGTCCGTA[C/T]CGGATCTATGTTTATTATAGCATGGGCAGTTCCGC
Y	AX-166517631	Affx-88809761	AX-89847197	Affx-88809761	T	G	SNP-SNP	1	981384	1	22849449	ATCTATGTTTATTATAGCATGGGCAGTTCCGCTTC[G/T]ACTAGCTGCAACAGCAACCTCATCTGCACCAATTG
N	AX-166511123	Affx-88809763	AX-89819266	Affx-88809763	T	G	SNP	1	982702	1	22850767	TCCAATGAAAAATTACAAACAAGAGATACCAGAAA[G/T]GCCATAGTGTTGGGCAAGGGAAATGGGGTCGAGCA
N	AX-166503154	Affx-88809764	AX-89780913	Affx-88809764	T	C	SNP	1	982832	1	22850897	TTGGCTTTGCCGTCGTCCTTGATATTCTTTTCTAA[C/T]GGTTTACTGAGATTAGGAGAATGAAGAGAGGACGA
N	AX-89876385	Affx-88809767	AX-89876385	Affx-88809767	A	C	SNP	1	985663	1	22853754	GTAATCGCAATTTCTCCCAACTCAACCAATGAATC[A/C]TTTCACCCACATCAGATTGCCCCCACAAAAAATTT
Y	AX-166519747	Affx-88809771	AX-89872952	Affx-88809771	A	G	SNP	1	1021631	1	22889786	AAGCTTGGTGACAGGCTTCTGCGCCCAGCAATGGT[A/G]AAGGTATCAGCTGGTCCAGGGCCTGCTAAGCCAGA
Y	AX-166519748	Affx-88809772	AX-89872953	Affx-88809772	A	G	SNP	1	1021674	1	22889829	CAGCTGGTCCAGGGCCTGCTAAGCCAGAGCAGCAA[A/G]TCGCCCCATCTGTGGAAGATGATGCAATTGAAACA
N	AX-166509092	Affx-88809776	AX-89803012	Affx-88809776	T	TTTAC	Indel	1	1025273	1	22893429	GGATGGCTACATGTGTAAGGATGGCCGATGTTGGT[-/TTAC]TAGTTGCATCTCATGGTAGCGGTGGCAGAACTGAA
Y	AX-166517510	Affx-88809777	AX-89846760	Affx-88809777	T	C	SNP-SNP	1	1026542	1	22894696	AAAATATGCTGGAGGAAGAACCTTGGAAAAACCTC[C/T]GAGAGATATGCAGGCAAGATAATTATAAAGCAACA
Y	AX-166519437	Affx-88809778	AX-89815844	Affx-88809778	A	C	SNP	1	1027024	1	22895178	TATTCTCAAAGTCCACCTTATGATTATCAGTATGA[A/C]GATCGACGATATGGAAAGCAAGCTGCTGCACTTAC
N	AX-166510307	Affx-88809780	AX-89815850	Affx-88809780	T	C	SNP	1	1029373	1	22897529	CAGTGACCTAACATTACTTTGTTTATTCAGAGAAC[C/T]GTATCCTTGGGAAGTTATGGCTCACTGGATAGCTA
Y	AX-166519472	Affx-88809780	AX-89815850	Affx-88809780	T	C	SNP	1	1029373	1	22897529	CAGTGACCTAACATTACTTTGTTTATTCAGAGAAC[C/T]GTATCCTTGGGAAGTTATGGCTCACTGGATAGCTA
N	AX-89872994	Affx-88809784	AX-89815879	Affx-88809784	A	C	SNP	1	1048929	1	22917300	AAATTGCCTGAATGGACCACTTGGGTTCTGCTTGT[A/C]GCTCTTGCTCTCTATGATTTGGTCGCTGTTCTCGC
N	AX-166519753	Affx-88809785	AX-89815881	Affx-88809785	A	G	SNP	1	1049423	1	22917794	GCAGTTGAGAAGGGATGCTACTGAAATGTTCAGTC[A/G]AGGTATTAAACTTGGTCTTGGTGATTTCATTTTCT
N	AX-89904067	Affx-88809786	AX-89904067	Affx-88809786	T	C	SNP-SNP	1	1099636	1	22969237	TACATGACTACGTTTGGAGAAGATCAATCATTTCC[C/T]TGGAGCCAACTTTAAGTAACGTAAAACACAACATA
N	AX-166510350	Affx-88809789	AX-89815970	Affx-88809789	T	C	SNP	1	1121315	1	22991418	TACCTCTGTCTACAAACAAAGTTAGGCCTTCCATT[C/T]AGCAAGCACCAAAGTTAGAGTTCAAACCGTTGCCC
Y	AX-166519782	Affx-88809789	AX-89815970	Affx-88809789	T	C	SNP	1	1121315	1	22991418	TACCTCTGTCTACAAACAAAGTTAGGCCTTCCATT[C/T]AGCAAGCACCAAAGTTAGAGTTCAAACCGTTGCCC
Y	AX-166502498	Affx-88809790	AX-89778419	Affx-88809790	T	G	SNP	1	1121663	1	22991766	TTTACAAGGAGCGCACCAAAAAGTTTCATGACAAG[G/T]TCATTCGTCAAAAGACTTTTGAGCCAAATCAGAAG
Y	AX-166510352	Affx-88809792	AX-89815972	Affx-88809792	T	G	SNP	1	1122022	1	22992125	AAGAAGATAGATGAGTATTCAGCAAGGAAGAAGGC[G/T]TCTCAACGTGCTCCTATCTATTGCCTTCATACCAG
N	AX-166519783	Affx-88809792	AX-89815972	Affx-88809792	T	G	SNP	1	1122022	1	22992125	AAGAAGATAGATGAGTATTCAGCAAGGAAGAAGGC[G/T]TCTCAACGTGCTCCTATCTATTGCCTTCATACCAG
Y	AX-166519784	Affx-88809793	AX-89873080	Affx-88809793	T	C	SNP	1	1122058	1	22992161	TCTCAACGTGCTCCTATCTATTGCCTTCATACCAG[C/T]ACTACATCTTTTTTAGCTTCAGACGACTTGGATCA
Y	AX-166526681	Affx-88809794	AX-89904072	Affx-88809794	A	G	SNP-SNP	1	1132778	1	23002888	CAGCTCGAATCACCACCAAAGTCATCGGAAACACA[A/G]TGGTACCGCTCGATTCTTGCAGCATCAAGACACTA
Y	AX-166517521	Affx-88809797	AX-89846786	Affx-88809797	A	G	SNP-SNP	1	1154037	1	23025143	CCGGGAAGAGAAACCACCGTCGTCAGGGCCAAACG[A/G]TGGAGAACGGAGAGACGTCAACACTTTAAGGGCGG
N	AX-166517522	Affx-88809798	AX-89846788	Affx-88809798	T	G	SNP-SNP	1	1161001	1	23032109	AGGAATGTCGTTAAGGACGATAAAATGAATTGGCA[G/T]ACATGAGTTACGGGTATTTTGAGTTGTAGGTAAAA
N	AX-166510386	Affx-88809802	AX-89816052	Affx-88809802	A	G	SNP	1	1205118	1	23074797	CAAACGGTTGTTCGAAGGACCTCAAAATCCATCCC[A/G]AACAGTATGGGCTCTAAGAAAACACGCTTATGTTT
N	AX-166510391	Affx-88809805	AX-89816061	Affx-88809805	A	G	SNP	1	1209306	1	23079238	TCCAGATGCCCTGCATCCACAACCCTTAATTTAGC[A/G]CATCCCTATTAGTCAACCTCAGGTCATATATCGAG
N	AX-123364964	Affx-88809806	AX-89816062	Affx-88809806	A	G	SNP	1	1209928	1	23079862	TCATCAAGCAGATTAACATCCAAAATGCTTGGCAC[A/G]TAACCTGCATAAAGGACTTGCATGAGTTACACAAC
Y	AX-166510392	Affx-88809806	AX-89816062	Affx-88809806	A	G	SNP	1	1209928	1	23079862	TCATCAAGCAGATTAACATCCAAAATGCTTGGCAC[A/G]TAACCTGCATAAAGGACTTGCATGAGTTACACAAC
N	AX-166519819	Affx-88809808	AX-89873180	Affx-88809808	A	C	SNP	1	1211543	1	23081480	CTTTCAGGTAACGCCCAGTGCCTGTGACAGTACCA[A/C]CTGTTCCAATAGCAGCAACTAAAATGTCAACACTT
Y	AX-123359920	Affx-88809811	AX-89816067	Affx-88809811	A	G	SNP	1	1211922	1	23081859	ATCGTCACTATGAGTTTGTACCCTTTAGTAGCAGC[A/G]ACAAAAGCAATTCCCAGTCCTGTATTTCCACTAGT
N	AX-166519820	Affx-88809811	AX-89816067	Affx-88809811	A	G	SNP	1	1211922	1	23081859	ATCGTCACTATGAGTTTGTACCCTTTAGTAGCAGC[A/G]ACAAAAGCAATTCCCAGTCCTGTATTTCCACTAGT
Y	AX-166526670	Affx-88809812	AX-89904096	Affx-88809812	T	C	SNP-SNP	1	1265474	1	23136200	GAACGGGAAGGAGCTGCTAGTGGAGTCACCAAAAG[C/T]TGTTACACCACTTCATGAAAATGGCTCAGGCAAAG
N	AX-166502584	Affx-88809816	AX-89778735	Affx-88809816	T	C	SNP	1	1390576	1	23264664	TGATGAGTCTGTCAATGCCACTGATGAAGCTAGAC[C/T]TGTTGCTGATAATGTTGACACTGCTCCAGGGCCTG
N	AX-166526699	Affx-88809831	AX-89904122	Affx-88809831	T	C	SNP-SNP	1	1436011	1	23314371	AGATTGGACAACCAGGCAGTAGTAGCAAGATTGGA[C/T]GACCAAGGAATTTGAGGATAAGACAGTAGCAAAAT
Y	AX-123359965	Affx-88809834	AX-89816447	Affx-88809834	A	G	SNP	1	1438613	1	23316978	ATCCCAAAAGCTCTAACTTGGCCAGGTTCATACTT[A/G]AAACGGCCCTGGTTGCAGAAATATTTTATAGATCA
Y	AX-166517544	Affx-88809836	AX-89846851	Affx-88809836	A	G	SNP-SNP	1	1442985	1	23321554	GGCCATTGATCCTAAATTTGCGATGGCAAAACGAC[A/G]GCAAACATACTGTGGCTAAATAAAAACCAATTTGC
Y	AX-123356937	Affx-88809842	AX-89778856	Affx-88809842	A	G	SNP	1	1500076	1	2560889	TTTGTTCTGGTTCACTTTTGTTTCAAACAGTGAGG[A/G]AAAGTACTTCTCTTATTATCTGAAGAACAATCTCA
Y	AX-166502618	Affx-88809843	AX-89778857	Affx-88809843	T	C	SNP	1	1500365	1	2560600	TTTCTGAATGGAACTGAATTCACATACAGTGATAA[C/T]AGTACTAACTTGGCTCTGAGTGATTGTCATTCTAC
N	AX-166517547	Affx-88809844	AX-89846863	Affx-88809844	C	G	SNP-SNP	1	1500919	1	2560046	AAGGTGGAAATAAGTCAAGAGCACAGATTAATTGA[C/G]TTGAGGTCTCAACCGTCCGAGATTGAGGAAATATA
N	AX-89816551	Affx-88809846	AX-89816551	Affx-88809846	A	C	SNP	1	1501721	1	2559244	GAATCTAGAGCAAATACTAACAGAGTTGTTGGAAC[A/C]TAGTAAGTTCAAAGCAGTTTTCACATTAATTTGGC
N	AX-166502620	Affx-88809848	AX-89778865	Affx-88809848	A	G	SNP	1	1504673	1	2556292	TGCACTTATTAGGATTATCTTTCAGCAACTTTTCT[A/G]ATCCTTCAACTTCCATCTGGTCTTTAGGCACTTCC
Y	AX-123356940	Affx-88809849	AX-89778866	Affx-88809849	A	C	SNP	1	1504797	1	2556168	ACTCATCCCAATTAACTTCTTGTGACTTGTAACAG[A/C]CAAATTTGCATCATGTTTTAAGCCGTGGCTAGATG
Y	AX-123356941	Affx-88809851	AX-89778874	Affx-88809851	A	G	SNP	1	1510424	1	2550538	CGAGGTTTGCCTGAGAATAATCTTCTCAAGAGTGT[A/G]TCAGTAGATAAAGAGAGGGCCAATAATGTTGCCAA
Y	AX-166510501	Affx-88809854	AX-89816564	Affx-88809854	T	C	SNP	1	1511854	1	2549108	GTAGTGGGAAGACTTATACCATGCAACCACTGCCC[C/T]TTAAAGCATCCCAAGATATCTTAAGGCTAATGCTT
N	AX-166519924	Affx-88809854	AX-89816564	Affx-88809854	T	C	SNP	1	1511854	1	2549108	GTAGTGGGAAGACTTATACCATGCAACCACTGCCC[C/T]TTAAAGCATCCCAAGATATCTTAAGGCTAATGCTT
N	AX-123356942	Affx-88809857	AX-89778879	Affx-88809857	T	G	SNP	1	1512121	1	2548841	CAAGTATGTATTGTTGGCTTGCAAGAGTACAGGGT[G/T]TCAGATGTTGAGACAGTCAAGGTGTTGATTGAGAA
N	AX-166502623	Affx-88809858	AX-89778880	Affx-88809858	T	C	SNP	1	1512316	1	2548646	GTAGGAAAGCTATCTTTCATAGACCTTGCTGGAAG[C/T]GAACGCGGTGCAGATACTACAGATAATGATAAACA
N	AX-166510502	Affx-88809859	AX-89816566	Affx-88809859	T	C	SNP	1	1512665	1	2548297	CAAGGCCACATTCCTTTCAGAGGGAGTAAACTGAC[C/T]GAAGTTCTTAGAGATTCATTTGTTGGCGACTCGCG
N	AX-166502624	Affx-88809860	AX-89778881	Affx-88809860	T	C	SNP	1	1512755	1	2548207	ATTTCACCAAGCTCAGGATCATGTGAACACACTCT[C/T]AACACACTAAGATATGCTGACAGGTATTCTCTTTT
N	AX-166502625	Affx-88809861	AX-89778882	Affx-88809861	A	G	SNP	1	1512884	1	2548078	CATCATGAACTTGCCACTTTCAGGGTGAAGAGTTT[A/G]TCGAAAGGGAACAGCTCCAGAAAGCAACAACTACC
Y	AX-166502627	Affx-88809863	AX-89778893	Affx-88809863	T	C	SNP	1	1527426	1	2533529	GGAAACGAGCATGTTTAGTGAGAAAAATGGATTGC[C/T]GAGGAAGGCATTTCCGAACGGGTGGAAAGGGGAGA
N	AX-166502630	Affx-88809865	AX-89778907	Affx-88809865	A	G	SNP	1	1533897	1	2527056	TAGGCAGGGCAAGTGAGGCGAGAGTAGTAATGAAA[A/G]ACTTCTTGTACATCCAGAACATGATCCACATTGCT
N	AX-166502631	Affx-88809871	AX-89778913	Affx-88809871	A	G	SNP	1	1545612	1	2515342	AGACAATGCAAAGTTAACTATGTACCCAACTAACA[A/G]ACCAAAAGTGATGAACACCTCAGGGAGAGAGGTCA
Y	AX-123359978	Affx-88809874	AX-89816608	Affx-88809874	T	C	SNP	1	1550039	1	2510910	AAAGTTACTGCAGCCAGGACTATAGTGTAACGCCT[C/T]CCAATCCAATCCGAAGTCTTGCCTGAGGCAATGGA
N	AX-123524159	Affx-88809874	AX-89816608	Affx-88809874	T	C	SNP	1	1550039	1	2510910	AAAGTTACTGCAGCCAGGACTATAGTGTAACGCCT[C/T]CCAATCCAATCCGAAGTCTTGCCTGAGGCAATGGA
N	AX-123524160	Affx-88809877	AX-89816615	Affx-88809877	A	G	SNP	1	1556714	1	2504230	AAGGCTTCAGTAAAGCTATTCCTCTGATGTCGAAC[A/G]TCCGACGGATCCACATTAAGAAAAACCGGGAGAAC
N	AX-166510517	Affx-88809878	AX-89816627	Affx-88809878	A	G	SNP	1	1561917	1	2498782	CTGTGCCCGAGAAGGGATCAGATCCAACTCTTGTA[A/G]TCTCCTTCCTAGATCAGGCATGTGACCACCTCCGT
N	AX-166519935	Affx-88809878	AX-89816627	Affx-88809878	A	G	SNP	1	1561917	1	2498782	CTGTGCCCGAGAAGGGATCAGATCCAACTCTTGTA[A/G]TCTCCTTCCTAGATCAGGCATGTGACCACCTCCGT
N	AX-89816628	Affx-88809879	AX-89816628	Affx-88809879	A	C	SNP	1	1562035	1	2498664	GCTTCCATGCAAGCTCTGTTTCTTTCACCAATGAT[A/C]ACAGAACTCTCTTCTACATCAGCTGTCGCCAGCGT
Y	AX-123364992	Affx-88809882	AX-89873736	Affx-88809882	A	C	SNP	1	1563753	1	2496946	TTGTTCTGCAGAAACTGCTCAGCTGAGCCATCCTC[A/C]ATTGGGCCAGCAGAGCTGAAGACCCTGAAAGGAAC
Y	AX-123363466	Affx-88809883	AX-89846876	Affx-88809883	A	G	SNP-SNP	1	1567959	1	2492085	AAGCTTTTCCGGCGACGTCGACACAGATATCGAAC[A/G]GATTCTGCTTCTGCTTCTTCGGCTTCTTCCTCTTC
Y	AX-166502643	Affx-88809884	AX-89778953	Affx-88809884	T	C	SNP	1	1569853	1	2489706	TTATTCATCTTGAGATGAAGAATCTTTGCTAGATC[C/T]TCAGGACTGAAGTCACTAAAGTTGAAAAACTTGGT
N	AX-166519937	Affx-88809885	AX-89873745	Affx-88809885	T	C	SNP	1	1570223	1	2489336	GTTTTTGGTCCCGTATGACCAACAAATTCCCCAAC[C/T]AAATCTGTCCGCTGTACTTCAGTTACTTTATCAGT
N	AX-166510519	Affx-88809887	AX-89816638	Affx-88809887	A	G	SNP	1	1570563	1	2488996	TTGAGATCTTGCAAACCAACTATATTTGACAATTC[A/G]TTTTCTAGTTCATCCATCTTAGCTTTAGTTTCAGT
N	AX-166519938	Affx-88809887	AX-89816638	Affx-88809887	A	G	SNP	1	1570563	1	2488996	TTGAGATCTTGCAAACCAACTATATTTGACAATTC[A/G]TTTTCTAGTTCATCCATCTTAGCTTTAGTTTCAGT
Y	AX-123364993	Affx-88809890	AX-89816649	Affx-88809890	A	G	SNP	1	1575457	1	2484100	CTTGAGTCTGTACAAGCAACTGTCAGAGAGCTTGA[A/G]GAAAACCTAAAGGATGGTATAGCCAATGCAGGTGG
N	AX-166502646	Affx-88809891	AX-89778961	Affx-88809891	A	G	SNP	1	1575754	1	2483803	CTTGTACACGATTTTGACAGATAAACAATGCTGGT[A/G]CAAATAAAGGATTTAGACCCTTGCTTCAGTTTAGT
N	AX-123366805	Affx-88809893	AX-89904137	Affx-88809893	A	G	SNP-SNP	1	1577411	1	2482146	TACCATTTTTTTACCCTGCATCCATTCGGACCCTA[A/G]TCTTATGTAAATCATTCATTCGTCTTGGATCATAT
N	AX-166510527	Affx-88809896	AX-89816659	Affx-88809896	T	C	SNP	1	1583570	1	2475986	TTTCTCCTACGGGGTTATGCTTCTGGAGTTGGTTA[C/T]TGGACGCCGCCCTGTTGATGCATCTCAAACTTACA
N	AX-166510528	Affx-88809897	AX-89816660	Affx-88809897	T	C	SNP	1	1583838	1	2475718	TGGCTCGTATGGTTGCTTGTGCTGCAGCTTGTGTA[C/T]GGCATTCTGCAAGGCGTCGACCACGGATGAGTCAG
N	AX-166502651	Affx-88809902	AX-89778974	Affx-88809902	A	G	SNP	1	1587163	1	2472393	GAGTAGGGGCAGTCTGTATAATCAAGAATATTAGG[A/G]AAGATGCTGGCACGAGGTTGATAATTCTTCAGGAT
N	AX-166510530	Affx-88809903	AX-89816666	Affx-88809903	A	G	SNP	1	1587910	1	2471646	CGCGAGGAAAAAGAAGCAATGTGATCACTGTAGTC[A/G]ATGCCACCAACACCAATGACATCACTTTGGTCTGC
N	AX-166519941	Affx-88809903	AX-89816666	Affx-88809903	A	G	SNP	1	1587910	1	2471646	CGCGAGGAAAAAGAAGCAATGTGATCACTGTAGTC[A/G]ATGCCACCAACACCAATGACATCACTTTGGTCTGC
Y	AX-123364994	Affx-88809905	AX-89873775	Affx-88809905	T	G	SNP	1	1591165	1	2468391	GGCTTTCCTAAGGCGTATGTTGGATGGACGAGATC[G/T]TGGCATTTTTGTGCTATTGCTATTGCTTAGTTGTA
Y	AX-166510546	Affx-88809915	AX-89816723	Affx-88809915	T	C	SNP	1	1622528	1	2415161	CAAATCTTCCTTCACTTGTTCAGCATTCTTGCCAG[C/T]AGAAAATCCCATGTAGGTGAAAAATACCAACAAAT
N	AX-166519958	Affx-88809915	AX-89816723	Affx-88809915	T	C	SNP	1	1622528	1	2415161	CAAATCTTCCTTCACTTGTTCAGCATTCTTGCCAG[C/T]AGAAAATCCCATGTAGGTGAAAAATACCAACAAAT
Y	AX-166510547	Affx-88809917	AX-89816725	Affx-88809917	T	C	SNP	1	1625269	1	2412411	GATGCCTGTTTGGCCATTTTGGGTTCAAACAATGC[C/T]ATCATCCTCACAGTACTAAACTCAGATGGTGAACC
N	AX-166510548	Affx-88809922	AX-89816729	Affx-88809922	A	C	SNP	1	1631008	1	2406671	GATGAACAATTTAATTTCAAGAGGGAAGCCTCATG[A/C]AGCGCATTCTATCTTCAATAATTTAGTAGAAGAAG
Y	AX-123364998	Affx-88809923	AX-89816731	Affx-88809923	A	C	SNP	1	1631049	1	2406630	ATTCTATCTTCAATAATTTAGTAGAAGAAGGACAT[A/C]GGCCAACTCTTATAACATACACAACTCTTGTAGCT
N	AX-166510549	Affx-88809923	AX-89816731	Affx-88809923	A	C	SNP	1	1631049	1	2406630	ATTCTATCTTCAATAATTTAGTAGAAGAAGGACAT[A/C]GGCCAACTCTTATAACATACACAACTCTTGTAGCT
Y	AX-123359989	Affx-88809926	AX-89816733	Affx-88809926	A	G	SNP	1	1631552	1	2406127	GAGAATGGAGAGACCAGTAAAGCTGAAAGGTTGAT[A/G]TTGGAGATGCAACACAACAAAGTGAATCCCAATGA
N	AX-166519960	Affx-88809926	AX-89816733	Affx-88809926	A	G	SNP	1	1631552	1	2406127	GAGAATGGAGAGACCAGTAAAGCTGAAAGGTTGAT[A/G]TTGGAGATGCAACACAACAAAGTGAATCCCAATGA
Y	AX-166502662	Affx-88809928	AX-89779006	Affx-88809928	T	C	SNP	1	1631642	1	2406037	GTAAATGGATATTGTAAAGAAGGTAACATGACAGA[C/T]GCTTTGAAGTTTGTATATAGAATGAAGGATATTGG
N	AX-166510550	Affx-88809929	AX-89816734	Affx-88809929	T	C	SNP	1	1631916	1	2405763	TTGACAGGTACTGACATTGATGGAAGAATTTGGGA[C/T]GAAACCAGATGTAATAACATTTAGCACCATAATGA
N	AX-166519961	Affx-88809929	AX-89816734	Affx-88809929	T	C	SNP	1	1631916	1	2405763	TTGACAGGTACTGACATTGATGGAAGAATTTGGGA[C/T]GAAACCAGATGTAATAACATTTAGCACCATAATGA
N	AX-166502663	Affx-88809934	AX-89779008	Affx-88809934	A	C	SNP	1	1632445	1	2405234	AGACTCCTCAATGAGTCAGAAGATGATTCAGAAGT[A/C]ACACTAAACAAGGTACCTGAACAGAGTTTGGAGAC
N	AX-89812294	Affx-88809935	AX-89812294	Affx-88809935	T	G	Codon-based	1	1637510	1	2400165	CTTTGTAGCGTTGGTATCTATGTGGTGAGCTTACC[G/T]TTCACTCACCGATCAAGAACAGCTCAGAGGAGTAA
Y	AX-166510551	Affx-88809938	AX-89816740	Affx-88809938	T	G	SNP	1	1639729	1	2397939	GCCATCTATTGGAGAACAAGAATCAATTGCATCAA[G/T]TGGCTTATGACTATGGTAGTCACCTCCCCGCTTTT
N	AX-123359992	Affx-88809939	AX-89816741	Affx-88809939	T	C	SNP	1	1639929	1	2397739	TCACCAAGATGGACACTTCCTTCAGACAAGGAAAG[C/T]ATAGGCCCTTGCTGGTGCAGCTCGGCGGAAAGCGT
N	AX-166510552	Affx-88809940	AX-89816742	Affx-88809940	T	C	SNP	1	1639997	1	2397671	CGTTACGCTCTGTCTGGTAAGCCCATTTTTGAACC[C/T]GCACCAGCTAATCCTGCATTTGAGGTATTTGACCC
N	AX-89816744	Affx-88809941	AX-89816744	Affx-88809941	A	G	SNP	1	1640028	1	2397640	AACCCGCACCAGCTAATCCTGCATTTGAGGTATTT[A/G]ACCCCTGGCTGAAGAATTGGACTCCACTGGCAGAA
Y	AX-123524164	Affx-88809943	AX-89816747	Affx-88809943	T	G	SNP	1	1641485	1	2396183	CGCCTTTGCATCATCACAATTACCTTCTTCTTCGA[G/T]CCACAGTTGTCCGGGTGAACTACTTCCTCTATTAA
N	AX-123356959	Affx-88809944	AX-89779016	Affx-88809944	A	G	SNP	1	1642752	1	2394916	ATCCAAGTCCATATAGTTGCAAAGAGAAAGGCTTC[A/G]TTGGTCGTCTCCATATTGGTATCTTTGGTAGTTTC
N	AX-166519965	Affx-88809946	AX-89873855	Affx-88809946	T	C	SNP	1	1643944	1	2393715	CCCCAAAACCCACAATTCCAAGCTCTCAATCAAAA[C/T]CCACTTCAGAAAACTCGTCTGCAAAGCTTTAAAGG
N	AX-166502665	Affx-88809948	AX-89779017	Affx-88809948	T	G	SNP	1	1644248	1	2393411	TACCCTACTTTGGATGTTGGAGATAGAATTGTAGC[G/T]GAGAAGGTTCGATTTTTGTTTCGTTTTTTGGTTTT
N	AX-166510553	Affx-88809949	AX-89816758	Affx-88809949	A	C	SNP	1	1645651	1	2392008	TAGTTAATGGGGTCGAGAGAAATGAAAAGTTCATC[A/C]TGGAACCACCTTCTTATACTATGACACCTATAGTA
N	AX-166510556	Affx-88809951	AX-89816769	Affx-88809951	A	G	SNP	1	1653869	1	2383790	CCCGGGGATATGGCAGAACTGATCTGCTTGGAGGC[A/G]TTGTAGATATGGCGAACGAATGGCATTCTTTTGAT
N	AX-166519966	Affx-88809951	AX-89816769	Affx-88809951	A	G	SNP	1	1653869	1	2383790	CCCGGGGATATGGCAGAACTGATCTGCTTGGAGGC[A/G]TTGTAGATATGGCGAACGAATGGCATTCTTTTGAT
N	AX-123538669	Affx-88809956	AX-89816773	Affx-88809956	A	C	SNP	1	1661665	1	2376448	ACACTTGGAGAAGGGTGGCACAATAATCACCACGC[A/C]TTTGATTACTCAGCTCGACAAGGCCTCGAATGGTG
Y	AX-123614495	Affx-88809958	AX-89806369	Affx-88809958	C	CCAG	Indel	1	1662606	1	2375507	TCTTGGATGATTGGAGTGGCACAGTCTCCAGGAAC[-/CAG]CTGTGGTTTTTCTTGGATGATCTGAGTAGAATCTT
N	AX-123364999	Affx-88809963	AX-89873886	Affx-88809963	A	G	SNP	1	1677379	1	2360725	CGGCCGGTCGCTTTTCATCGCCTGGTCGGAGGCTC[A/G]TCGGTCAGGTATGATACTCAGAAACCGGAAAAGTT
N	AX-123356962	Affx-88809964	AX-89779036	Affx-88809964	T	G	SNP	1	1678567	1	2359537	GGGCAGTATTATTGGAATTTTCATATTTCTGTAAT[G/T]GAAGTGTCCATGATCCTGGTAAGAATGATCGAGTT
N	AX-166519971	Affx-88809965	AX-89816790	Affx-88809965	A	C	SNP	1	1679863	1	2358241	ATCCCATGTTCCTTTCCCTACTCCTTTGCACATTA[A/C]ATCTCTCTCCAACATTGAGTACAGACTATCTGCAA
Y	AX-166502672	Affx-88809971	AX-89779044	Affx-88809971	A	G	SNP	1	1688023	1	2350076	GTACTAAAAGCAGCAATGGCAATCAATGCTCAAGT[A/G]CTATCAGAAATGGAGGTACCTGAGAACTACATTGA
N	AX-166510562	Affx-88809972	AX-89816797	Affx-88809972	A	G	SNP	1	1688436	1	2349663	ACTGTCTTACTCATAATCAAACAGAAGTTCCCAGG[A/G]ATTCCCCAATCTGCACTTGACATAAGTAAAATCCA
Y	AX-166519973	Affx-88809972	AX-89816797	Affx-88809972	A	G	SNP	1	1688436	1	2349663	ACTGTCTTACTCATAATCAAACAGAAGTTCCCAGG[A/G]ATTCCCCAATCTGCACTTGACATAAGTAAAATCCA
N	AX-166519974	Affx-88809973	AX-89816798	Affx-88809973	T	G	SNP	1	1688928	1	2349171	CCACCACCTGCTGTAAGCACCAAGAGGTTTTCATA[G/T]TTAGAAAAGCTCGAGAAGTTGAGTGGTCTAAGAAG
Y	AX-123524168	Affx-88809975	AX-89816800	Affx-88809975	A	C	SNP	1	1690296	1	2347803	ATCCGACGCAGTCTGGGACAAGTTCATCCCACCTG[A/C]TACACACGCGATCCTTTCCCAGTCCAACTCCCTTC
N	AX-166510564	Affx-88809978	AX-89816802	Affx-88809978	A	C	SNP	1	1692083	1	2346016	GAATTACGTGCAAATAGAAAACGTGCGCTATGCCT[A/C]GGCAAAGTCTCATGCCATCTTGTTCTTGTGAGAGC
Y	AX-166519976	Affx-88809978	AX-89816802	Affx-88809978	A	C	SNP	1	1692083	1	2346016	GAATTACGTGCAAATAGAAAACGTGCGCTATGCCT[A/C]GGCAAAGTCTCATGCCATCTTGTTCTTGTGAGAGC
Y	AX-166502675	Affx-88809979	AX-89779051	Affx-88809979	T	C	SNP	1	1692152	1	2345947	GCAAGCTTGTGGGTAAATTGTTCACACAGGAGAAT[C/T]CTCTATCAAACACAAAAGCAAGTTCATTCTTTAGT
N	AX-166519977	Affx-88809980	AX-89816803	Affx-88809980	A	G	SNP	1	1692350	1	2345749	GGTTAGCAGAAACGCATCCGAGATGATCAACAACA[A/G]TAATCACAGCTCTGCATACATACTCTTTTGTGTTT
Y	AX-123367790	Affx-88809983	AX-89904155	Affx-88809983	A	G	SNP-SNP	1	1695556	1	2342541	TGAAAGCTTGAATTTTTCTCTCTCTTTATAGCTAT[A/G]GATGCGACTGATTCAGCAAAGTTTTCTGTTTCTAC
N	AX-89816813	Affx-88809986	AX-89816813	Affx-88809986	T	C	SNP	1	1696054	1	2342043	GGACCATAGGAACGCAGTCTAGGATTTATTCCCAT[C/T]GACTTCATTTGCTTCACCATGTCGAATGCCATATC
N	AX-89873918	Affx-88809986	AX-89816813	Affx-88809986	T	C	SNP	1	1696054	1	2342043	GGACCATAGGAACGCAGTCTAGGATTTATTCCCAT[C/T]GACTTCATTTGCTTCACCATGTCGAATGCCATATC
N	AX-123364701	Affx-88809989	AX-89867012	Affx-88809989	A	G	SNP-in-Insertion	1	1699509	1	2338588	TTGGCAGCATCAAGTTCTGCTTGCATGGTAGCTGC[A/G]ACAGCTAGACATGATTTGTGTGGGAAGCTAAGGGA
Y	AX-89816830	Affx-88809990	AX-89816830	Affx-88809990	A	G	SNP	1	1703299	1	2334797	ATCAGCGCATATGTCCAACCCTAAAATCTTTGTCA[A/G]AAATATGTTGGTACTAGGAAAGAGAATCAAAGAAG
N	AX-89779082	Affx-88809992	AX-89779082	Affx-88809992	T	C	SNP	1	1706760	1	2331336	AGTATTATCTCCAGAATTTCTTGGTCTGTAACAGA[C/T]AGAGGCTGCAAACCATATCCCAGAAAATCCAATGA
N	AX-166519995	Affx-88809994	AX-89816858	Affx-88809994	A	G	SNP	1	1709581	1	2328514	GCTTTCAGCAACTCTTGAGAAGGCACAATAGCATC[A/G]ATAAGACCAAGCTTTGCCCCTTCTTCAGACATGAT
Y	AX-166520000	Affx-88809997	AX-89873977	Affx-88809997	T	G	SNP	1	1713906	1	2324189	TGAGCTGACGGATCCTTGACTGTCTGTCCAAAAAA[G/T]AGTTCCTGACCTTTTCTTTTCTTGGATACCATTGG
N	AX-123520249	Affx-88810000	AX-89779102	Affx-88810000	T	C	SNP	1	1715052	NA	2323043	CTTGCAATTTTTGGCCTGAATGCATTTGGATTACG[C/T]TCCAAAGTAGCTTCGACTGCATCTCGTCTAGCACC
Y	AX-123360005	Affx-88810002	AX-89816868	Affx-88810002	T	C	SNP	1	1715413	1	2322682	TACAGCTTTAAACAGCGAGAGTGTTTACAATTACA[C/T]TGTTTTTGCTTCTTAGGAGTGCCATCTTTACCATC
N	AX-89816903	Affx-88810011	AX-89816903	Affx-88810011	A	G	SNP	1	1737339	1	2300398	AGCAAAAGAAGCAGTTGGAGCAGCTGAAACTCCAT[A/G]TGGTGGTTGGTCTGTGACAAGATTGCGCTCTGCTG
N	AX-166502694	Affx-88810016	AX-89779125	Affx-88810016	A	G	SNP	1	1739353	1	2298382	TTTGTTGAACTATTACGCCAAGTAGCTGGTTTGAA[A/G]CGTCGTCTGTTTGCGTTGTTTGGACATCCTGCTGA
Y	AX-166502695	Affx-88810019	AX-89779127	Affx-88810019	T	C	SNP	1	1739917	1	2297818	CAGGCTTCGACCATTCAATCTTCTGGTGCTAAGAC[C/T]GGTGAAAACTTGACCAGTGAAGTATCTTCTACTGG
N	AX-166520009	Affx-88810020	AX-89816908	Affx-88810020	A	G	SNP	1	1740370	1	2297365	GATAGTGTGCCACAGATATCTTGGAACTACTCTGA[A/G]TTCTCTGTCAGATATCCTAGTTTGTCTAAAGAAGT
N	AX-166520011	Affx-88810023	AX-89874025	Affx-88810023	T	C	SNP	1	1742083	1	2295652	CAGGTCGGGGAGGCGGCATTGTCCATATTGCACAG[C/T]ATGGTATCTGCACATTCTGATTTAGACGATGCTGG
N	AX-123576692	Affx-88810024	AX-89816911	Affx-88810024	T	C	SNP	1	1742110	1	2295625	TTGCACAGCATGGTATCTGCACATTCTGATTTAGA[C/T]GATGCTGGAGAAATAGTTACCCCAACTCCTAGAGT
N	AX-166510591	Affx-88810025	AX-89816914	Affx-88810025	A	G	SNP	1	1742541	1	2295194	CAGTTTCCTCTTCCTTACCTCTGGCAAAACGCAGT[A/G]TATTGGGTGGGCTTCTCCCTGAATCTTTGCTGTAT
Y	AX-166510592	Affx-88810026	AX-89816915	Affx-88810026	T	C	SNP	1	1742586	1	2295149	GGCTTCTCCCTGAATCTTTGCTGTATGTATTAGAG[C/T]GTAGTGGTCCAGGTGCATTTGCAGCTGCAATGGTA
N	AX-89874033	Affx-88810032	AX-89816920	Affx-88810032	A	C	SNP	1	1743564	1	2294171	TGGTTATCCAATGTTGCTCAATGCAGTTACTGTGG[A/C]CAAGGATGATAACAATTTTCTCTCCTTGGAGAGAG
N	AX-166510594	Affx-88810035	AX-89816924	Affx-88810035	A	C	SNP	1	1745358	1	2292377	CGATCAGCCGGATTTTGAAATCAGTGAACAAGAGG[A/C]TTTCTGTGTTGCCTTAATTGATTTTATATCATATC
Y	AX-123360014	Affx-88810037	AX-89816925	Affx-88810037	A	G	SNP	1	1745962	1	2291772	CAAGTTGTCGTGAGGGGGTTCTTCATGTTCTATAC[A/G]CTCTGGCAAGCACACCAGAGTTGGCTTGGGCAGCT
N	AX-166520014	Affx-88810038	AX-89816929	Affx-88810038	T	C	SNP	1	1746655	1	2291079	GGAAGGACTGCTAGACCAGTATTTGACATCCATTG[C/T]CGCCACACATTATGAATCACAAGCAGTCGACCCTG
N	AX-166502700	Affx-88810039	AX-89779141	Affx-88810039	T	G	SNP	1	1746779	1	2290955	GCCCTTGCAGATCATGTTGGATATCTTGGTTATGT[G/T]CCCAAACTTGTGGCTGCTGTGGCTTATGAAGGAAG
N	AX-166510599	Affx-88810041	AX-89816933	Affx-88810041	T	G	SNP	1	1747270	1	2290464	TTTATGTTACGCAGGTCGTTCCTCTTCTAATGAAA[G/T]CTATAGGATGGCAAGGTGGAAGCATACTAGCTCTG
N	AX-166518983	Affx-88810046	AX-89862620	Affx-88810046	T	TTGA	Indel	1	1764140	1	2274669	TCTGTTGATCATACGTATGTTATGAAAATAAAAGT[-/TGA]TGACCTCATGCATACGCTGAAAAGTATTCGGGAGA
Y	AX-89817001	Affx-88810051	AX-89817001	Affx-88810051	T	C	SNP	1	1789783	1	2249176	TCTTCAATGACTCTGGAGTATAGGAGGGAGTGTGG[C/T]AGGGACAGTGTGCTTCAGTCCCTGTCTGCAGTTTC
N	AX-123572232	Affx-88810052	AX-89817002	Affx-88810052	T	C	SNP	1	1789942	1	2249017	AGGACTGGTTGGAGGCCCAAAAAACCCAACAATCT[C/T]GGGATTATGGGTGGGTTTCCAGCTGAAAGCGCATA
N	AX-166520037	Affx-88810054	AX-89874120	Affx-88810054	A	C	SNP	1	1792279	1	2246679	AGTTGGGTGGCCGCCGGTGAGATCGACGAGAAATA[A/C]GGCTTTGGACTCCAAGAACTTAAAGAACATCAGCA
N	AX-166502714	Affx-88810063	AX-89779193	Affx-88810063	T	C	SNP	1	1797822	1	2241135	TCAGTGGGTATTTATCACCAGCAATTGACATATTG[C/T]GTTGTACAGTTTATAGAGAAGGACCCAAAGTTGGC
N	AX-166502715	Affx-88810064	AX-89779194	Affx-88810064	T	C	SNP	1	1797966	1	2240991	GAGTTAGAAGAGGTTTTGGAAATGACTAGCATGGA[C/T]GAGTTCCAAAAGATCATGGTCCCTCTGTTCCGAAG
N	AX-123360022	Affx-88810065	AX-89817014	Affx-88810065	A	G	SNP	1	1797998	1	2240959	GGACGAGTTCCAAAAGATCATGGTCCCTCTGTTCC[A/G]AAGAATCAGATGCTGCCTCAATAGTTCCCATTACC
Y	AX-166520045	Affx-88810075	AX-89817043	Affx-88810075	T	G	SNP	1	1813148	1	2225806	AAGCAGAGAGGAATGGTGCTCCCATTTCAACCACT[G/T]TCCATGTCTTTCAGCAATATCAATTACTATGTCGA
Y	AX-166510625	Affx-88810080	AX-89817046	Affx-88810080	T	C	SNP	1	1813565	1	2225389	CCCTGCTTGACTGTCGTTGAATCACTTATGTTCTC[C/T]AGTTGGCTTCGCTTGCCATCAGAAGTTGACTTGGA
N	AX-166510626	Affx-88810081	AX-89817047	Affx-88810081	T	C	SNP	1	1813740	1	2225214	TTGTAGAGGAGGTGATGGAACTTGTGGAGCTCACT[C/T]CATTAAGAGGGGCACTGGTTGGTTTACCGGGGGTG
Y	AX-123365005	Affx-88810083	AX-89817049	Affx-88810083	T	C	SNP	1	1813907	1	2225047	CTAGATGCAAGGTCTGCAGCCATTGTGATGAGGAC[C/T]GTGAGGAATATAGTCAATACTGGACGTACTATAGT
N	AX-89817049	Affx-88810083	AX-89817049	Affx-88810083	T	C	SNP	1	1813907	1	2225047	CTAGATGCAAGGTCTGCAGCCATTGTGATGAGGAC[C/T]GTGAGGAATATAGTCAATACTGGACGTACTATAGT
N	AX-166502725	Affx-88810086	AX-89779224	Affx-88810086	A	C	SNP	1	1820926	1	2218235	ACAGCCTCCACAGTCTTCATGTTCAGGTTTTGATC[A/C]CCAAAAAATGGTCGGCATATCATAGGCACACCACC
N	AX-166520050	Affx-88810089	AX-89817070	Affx-88810089	A	G	SNP	1	1827532	1	2211623	CCAACCGTCCACACTCTAACCAAGTCATCACTCAC[A/G]GAAGCTAGGTACTCACCAGAAGAATCCCAGCACAC
N	AX-166510629	Affx-88810090	AX-89817071	Affx-88810090	A	G	SNP	1	1828136	1	2211019	CTCCAGTATCTTATCTCACTATTGTTATCACAAGA[A/G]CACAGAAGATCCTCTTTAGTAGGGTGGAAGTCAAG
Y	AX-123365006	Affx-88810092	AX-89874197	Affx-88810092	T	C	SNP	1	1831129	1	2208026	CCGATTGTGAGCTTGTTGAAGATTCCCCAACATAC[C/T]TCCAGGTGTACCATGCAGCATTTGACTGTAAGGAA
N	AX-166502729	Affx-88810096	AX-89779239	Affx-88810096	T	C	SNP	1	1832364	1	2206791	TTTCCTTCAGCTTGAAAAGCCTTTGCAGAAGCATG[C/T]AAGTTTCTCTTCAGAAGGTAATCATAAATATAAAC
N	AX-166510633	Affx-88810097	AX-89817082	Affx-88810097	A	G	SNP	1	1834914	1	2204241	TCATCAACCGGAAGGCCTTTGTTTCTCCAGAACAC[A/G]GCGAGACCACTGCCGCCAAGCTGTAAGTGGGACAG
N	AX-166502730	Affx-88810100	AX-89779241	Affx-88810100	A	G	SNP	1	1836382	1	2202925	CAGCAAGCAGCTTGGTAAGAAGCGGTGTCATAATA[A/G]TAGCTCCTATTGTTGAACACCTACATAAAGTCCAC
N	AX-166510634	Affx-88810101	AX-89817084	Affx-88810101	T	C	SNP	1	1836540	1	2202767	TACGTTGTCATGAGAACAGATAGTGCAACATTTCC[C/T]TTTGAGATATATGTTGCAACATTTGATGCCTGACC
Y	AX-166502735	Affx-88810103	AX-89779248	Affx-88810103	T	G	SNP	1	1843647	1	2195659	GGTATAGAGAGATGAGTGTAAGATTTAGATGCGTG[G/T]TTGGGTTTCTGGCTACGTTTTTGCTACTGGGTTAT
N	AX-166520055	Affx-88810108	AX-89817107	Affx-88810108	T	G	SNP	1	1851078	1	2188217	TAGCAATGCCTCTTTGTAAAAACCTAATCTACAAT[G/T]TAGTCCAATAACTGCAGCCCAAGAAAACACATTTT
N	AX-89869349	Affx-88810113	AX-89869349	Affx-88810113	A	C	Codon-based	1	1872370	1	2166993	GCGACGAAGACTCGGCGAACACTGTCCTCGGTGGA[A/C]GGAGCTCTCGTCATCTCTCTCTCCCGCCTGTCGGC
N	AX-123524185	Affx-88810114	AX-89817147	Affx-88810114	T	C	SNP	1	1875117	1	2164244	CGATATCGGATCAGCTGAAATTGTAGCTTTGAAGA[C/T]GTAATTCTCCAAGGTATAACTGGAGGTAAGCCAGT
Y	AX-123524186	Affx-88810117	AX-89817161	Affx-88810117	A	G	SNP	1	1887157	1	2152209	ATCCGAGGCTATACGAACAAGGGTTTATATCGGGA[A/G]GCCATTTCTTTTTACCATGAAATGATTGTACAGGG
Y	AX-123524187	Affx-88810119	AX-89817162	Affx-88810119	T	G	SNP	1	1887290	1	2152076	GGAAACAGCTGCATTGTCAATCTACCAAGCTAGGC[G/T]TCGCTTCCGATTCGTACATTCAGAACACTCTGATG
Y	AX-123360038	Affx-88810120	AX-89817163	Affx-88810120	T	G	SNP	1	1887529	1	2151837	CCTAATGAGGTTACTTTGCTTAATGTTTTGACTGC[G/T]TGTGGGATGGCGAGGGATTTAGAAACTGCAAAAAG
N	AX-166502743	Affx-88810121	AX-89779292	Affx-88810121	A	G	SNP	1	1889420	1	2149946	CCCAGATGTTCATCCTTGGACTACACCAATGCAAA[A/G]CCACCCTGAACAAGCTCATGGTCTTCTGCACAGAC
N	AX-166509125	Affx-88810126	AX-89803168	Affx-88810126	G	GTTAC	Indel	1	1891980	1	2147382	GTTGGAAATAGGACACATTTTGTAACTTGGGTGAG[-/TTAC]TTGGGTTTTCTTAACTTGGAGTGGAAGAAAAAGTA
N	AX-166520075	Affx-88810132	AX-89817183	Affx-88810132	A	G	SNP	1	1901277	1	2138087	TGGCCAGTTTACCAGATCCTAATGCAGAAACAATT[A/G]GCTTGAAAAAAATGGAAGAAGGCATTGCTGCTGTT
Y	AX-166502747	Affx-88810133	AX-89779305	Affx-88810133	A	G	SNP	1	1901318	1	2138046	AAAAAAATGGAAGAAGGCATTGCTGCTGTTATCAA[A/G]TTTAGTGGGAAGCCTACCGAAGATGTTGTTCGTGA
N	AX-166510662	Affx-88810134	AX-89817184	Affx-88810134	T	C	SNP	1	1905044	1	2134077	CTATTTGCCAAGACATCTGTAAAACCCAAGGACAT[C/T]GGAATCTTGATTGTCAACTGCAGCTTGTTCAATCC
N	AX-166510663	Affx-88810135	AX-89817185	Affx-88810135	A	G	SNP	1	1905170	1	2133951	GTCAGCTACAATCTTGGTGGAATGGGATGTAGCGC[A/G]GGGCTCATCTCAATTGATCTTGCTCAAAAGCTTCT
Y	AX-89872270	Affx-88810142	AX-89872270	Affx-88810142	T	G	Indel-SNP	1	1909091	1	2130024	TTTTGAACTCGAGTTTGATTAGGATGTAAGAATCC[G/T]TTTTGACTTGAATTGTGGAGTTATTCTTCTATGTG
N	AX-166520076	Affx-88810144	AX-89817193	Affx-88810144	A	G	SNP	1	1913532	NA	2125586	TCGTACAAGCTTTGGAGTCCTGCTACATCGTGGTG[A/G]AGCGATTCGTCGAATTTCCCATCACAATCTTTGAA
Y	AX-166510665	Affx-88810147	AX-89817205	Affx-88810147	A	G	SNP	1	1916712	1	2122406	GTTTACTTACCGATCTCATCACCAGTATGGAAATC[A/G]AAAACATGAACCCACATGTCTTCTCCACCAGCAAT
N	AX-166520077	Affx-88810147	AX-89817205	Affx-88810147	A	G	SNP	1	1916712	1	2122406	GTTTACTTACCGATCTCATCACCAGTATGGAAATC[A/G]AAAACATGAACCCACATGTCTTCTCCACCAGCAAT
Y	AX-123614271	Affx-88810152	AX-89803174	Affx-88810152	T	TGAA	Indel	1	1923487	1	2115626	CAAGAAGACTTTGAGATGGCAGTTGCCAAGGTTAT[-/GAA]GAAGGAGACTGAGAAGAACATGTCCCTGCGCAAGC
N	AX-166520080	Affx-88810153	AX-89874342	Affx-88810153	T	G	SNP	1	1924716	1	2114400	GTACTTGGTGAGATGCATTAGCGCAGCTCAAACGG[G/T]GACGTGTGTTCCGGACAAGACCATTCAGATCAGGA
N	AX-166510669	Affx-88810160	AX-89817236	Affx-88810160	A	C	SNP	1	1930226	1	2108888	TTCATCTTGGCCACTGACAAAAATAAGATGATCAC[A/C]GTCTCTAATCACCTCTATATCGTCGATTTCAGCTC
N	AX-166510675	Affx-88810163	AX-89817251	Affx-88810163	T	C	SNP	1	1934402	1	2104712	AATCTGCTTTTGATCGTCAACAAGTAGATATGTAG[C/T]CTTATCCAGGTAAGCCACAAAGAATGTAAGAACAA
N	AX-123364859	Affx-88810165	AX-89872272	Affx-88810165	T	C	Indel-SNP	1	1935034	1	2104080	TAGAATTTTACAGTGAAATGCTTTTTATTAAGCAC[C/T]ACGTACGTTTATCACAGAGCATTAACACGTACACC
N	AX-89874403	Affx-88810169	AX-89817275	Affx-88810169	T	C	SNP	1	1951587	1	2087518	TTTTACTGCTGGGATACTGCTGGGCAAGAGAAATT[C/T]GGTGGCCTTCGAGATGGTTACTAGTAAGTGGTCTC
Y	AX-166510679	Affx-88810173	AX-89817304	Affx-88810173	T	G	SNP	1	1967219	1	2071915	AGCCAAACCACATCCAATTTGCTGACGTGGACGAC[G/T]GTTCTCTTGGCAATGCACCCACAGTGGCAGCTGCA
N	AX-166520097	Affx-88810173	AX-89817304	Affx-88810173	T	G	SNP	1	1967219	1	2071915	AGCCAAACCACATCCAATTTGCTGACGTGGACGAC[G/T]GTTCTCTTGGCAATGCACCCACAGTGGCAGCTGCA
N	AX-166518619	Affx-88810174	AX-89860556	Affx-88810174	G	GTTT	Indel	1	1974628	1	2064499	AAAGATGTCTTTGATAAGATGCGTACTTAAAAAGG[-/TTT]GTACTACATAGAGTTTAAACTTTGATCTGAACCAC
N	AX-123363496	Affx-88810176	AX-89847000	Affx-88810176	A	G	SNP-SNP	1	1976147	1	2062983	GCAACCTCTACTCCATATCTAACAGTATACTTGTG[A/G]CCGTCACGGCAGATGATCTTGGCACACCACCAAGA
N	AX-166520099	Affx-88810177	AX-89817331	Affx-88810177	T	C	SNP	1	1981086	1	2058043	AACCTCCATCAAACGATGATTTTCCTTGTTGCGCT[C/T]CATTGAGAAAGAACCATTCAGATTGTCCCCTTCAG
Y	AX-123357009	Affx-88810178	AX-89779422	Affx-88810178	A	G	SNP	1	1982344	1	2056785	TCAGAGAATGGTTTCGTTAGAGCACCCATATCAAC[A/G]CCATAATAAGATTGTGTTTCATCTGTGAACCGATA
N	AX-166502779	Affx-88810183	AX-89779445	Affx-88810183	A	C	SNP	1	1989131	1	2049994	CCAAATGACCATTGTAGATTTCTTGACACTTGATG[A/C]AGAAGAATCACAGTCACAAATCAATGGTCATCACA
Y	AX-166510687	Affx-88810184	AX-89817352	Affx-88810184	A	G	SNP	1	1991678	1	2047447	GTGGTAGAACTGTTAGAAGGGCATTTGAGTTTGGA[A/G]GAACCTATGTAGTCCGACCTAAAGGCAAACACCAG
N	AX-89874481	Affx-88810184	AX-89817352	Affx-88810184	A	G	SNP	1	1991678	1	2047447	GTGGTAGAACTGTTAGAAGGGCATTTGAGTTTGGA[A/G]GAACCTATGTAGTCCGACCTAAAGGCAAACACCAG
Y	AX-166502781	Affx-88810185	AX-89779454	Affx-88810185	A	C	SNP	1	1992340	1	2046785	TGATATGAAACAGGGTTTGATGTTGGAGAACTTTC[A/C]GAAGATGCTCCAGATGATATAGAGGGCTTGGATGC
Y	AX-123360061	Affx-88810186	AX-89817353	Affx-88810186	T	G	SNP	1	1992726	1	2046399	ATACTCAGCCACATGCTTTGCTATAAAGAAATACG[G/T]GGATGGTACTCCATACCCGTCCAATCTGAGTGCAG
N	AX-166520102	Affx-88810186	AX-89817353	Affx-88810186	T	G	SNP	1	1992726	1	2046399	ATACTCAGCCACATGCTTTGCTATAAAGAAATACG[G/T]GGATGGTACTCCATACCCGTCCAATCTGAGTGCAG
Y	AX-123360062	Affx-88810189	AX-89817365	Affx-88810189	T	C	SNP	1	2003963	1	2035166	TTCAAAAGTTCTGGAGCCATCCATGGTACAGTGCC[C/T]CGTACTCCACCAGAGACGAGTGTCCTCTGCTTGAT
N	AX-166502785	Affx-88810190	AX-89779469	Affx-88810190	T	C	SNP	1	2004226	1	2034903	AATCAAAATGGACAATGCTCTTCTCGTGAAGATAT[C/T]CCATTCCAAAGGCTGCATCCATTGCTAATATCATC
Y	AX-166510690	Affx-88810194	AX-89817366	Affx-88810194	T	C	SNP	1	2005981	1	2033148	TTAGCTAAATTCTGGAATGAAGGATTAGATTTGAC[C/T]TCATTTGATTCCTTGACTTGAGGACTCGTGATAAA
N	AX-123357011	Affx-88810195	AX-89779473	Affx-88810195	T	G	SNP	1	2006061	1	2033068	ATCCATGATATCCATCGGTTTTGATTGAGGTTTTA[G/T]CAAGGCGTCAGAAGTCACCACACAGCTAGCATGAG
N	AX-166502786	Affx-88810197	AX-89779475	Affx-88810197	T	G	SNP	1	2006590	1	2032539	AGATGCTGTAAAAGTCCAGGACCGTTCTGTTTACT[G/T]CCCTTCTGGGCACTATGTTGGACACCACTCAAGGA
Y	AX-89847009	Affx-88810200	AX-89847009	Affx-88810200	T	C	SNP-SNP	1	2008444	1	2030685	AGAGAAGCAGTAACTGGTCGGGATTCTATTGTACG[C/T]TAAAGTTCGCTTAACATCGTACTATGGTAAATCAA
Y	AX-123360064	Affx-88810204	AX-89817376	Affx-88810204	T	G	SNP	1	2013612	1	2025519	GTGGAAGCGAGATTGAGGGTCAGAAATCCGGCAAA[G/T]ATTACGGCGGCGGCTTTTCCCACCGTCTGCAGTGG
Y	AX-166502788	Affx-88810208	AX-89779481	Affx-88810208	T	C	SNP	1	2015921	1	2023210	AGACGAAGGATCATGTTTTGCCAATGCTTAGCTTT[C/T]CCTGCATTGTGGCGTCCACAAATAATTTCTCAGCT
N	AX-166510230	Affx-88810209	AX-89813032	Affx-88810209	A	C	SNP	1	2015955	1	2023176	TTCCTGCATTGTGGCGTCCACAAATAATTTCTCAG[A/C]TGCTAACAAGCTTGGAGAAGGAGGTTATGGGCCTG
Y	AX-166502792	Affx-88810213	AX-89779494	Affx-88810213	A	G	SNP	1	2021672	1	2017459	TTTTCTCAAAACACTTCTACAATGGCAGCCATAAC[A/G]AGCACTGAATCATCCGACTATGACAGTAGCTCTTC
Y	AX-166510694	Affx-88810214	AX-89817396	Affx-88810214	T	C	SNP	1	2023310	1	2015821	GTGAATTGGGCTTTGATTAGATCAGTTAGGCCTCC[C/T]CAAGTTCCTGCTAGCCATGATCATTTGCATAAGAT
N	AX-89874528	Affx-88810214	AX-89817396	Affx-88810214	T	C	SNP	1	2023310	1	2015821	GTGAATTGGGCTTTGATTAGATCAGTTAGGCCTCC[C/T]CAAGTTCCTGCTAGCCATGATCATTTGCATAAGAT
N	AX-166502795	Affx-88810215	AX-89779500	Affx-88810215	T	C	SNP	1	2023361	1	2015770	CATGATCATTTGCATAAGATTAGGACTAGTAGTAA[C/T]AGTAGAGGTCATAATTTACCTAAGTTGAGCAAGAA
N	AX-123360068	Affx-88810216	AX-89817397	Affx-88810216	T	C	SNP	1	2023415	1	2015716	CCTAAGTTGAGCAAGAAAGAGAGGGATGAACCATA[C/T]CAGATCCCTCATCATCATATTGACTATTTCTAATT
Y	AX-123360069	Affx-88810220	AX-89817405	Affx-88810220	T	C	SNP	1	2044053	1	1995065	CCCTCATGCGTAGAACCACCAATCATCACATTCCA[C/T]GAAATCACATCCCTCATTTGCATACCATCAAATAA
N	AX-123524203	Affx-88810220	AX-89817405	Affx-88810220	T	C	SNP	1	2044053	1	1995065	CCCTCATGCGTAGAACCACCAATCATCACATTCCA[C/T]GAAATCACATCCCTCATTTGCATACCATCAAATAA
N	AX-89779509	Affx-88810221	AX-89779509	Affx-88810221	A	G	SNP	1	2056596	NA	NA	AGATTGGTGGTGTGTTAAACGAAAATGGATCTTGC[A/G]GAGGTAGTAATATTGGAGATGGTTCATCAACAGTT
N	AX-89862655	Affx-88810222	AX-89862655	Affx-88810222	G	GGCTA	Indel	1	2056662	NA	NA	AGTTATTGGTGGTGGAAATGTAAAGATGGGAGAAG[-/GCTA]GCTGATCAGGTATAGGTATTGGTGGTGGTAATGTA
N	AX-166510711	Affx-88810230	AX-89817440	Affx-88810230	T	G	SNP	1	2071480	1	1967266	ATTGTAAGGGATTGTTGGGTAATTGTGGGGTTGAG[G/T]TGAGTGGTGATTCACTTGTGTATCTGGGTTCAAGG
N	AX-123524205	Affx-88810233	AX-89817442	Affx-88810233	T	C	SNP	1	2073879	1	1964867	ATCATCATGAGGCAGAACACCCTGCAATTCATCAG[C/T]AGCGATGATGACAATGTTCACTCCCCTCACCAACA
N	AX-166520128	Affx-88810234	AX-89874574	Affx-88810234	T	C	SNP	1	2073967	1	1964779	CTTAACAGATTGCGTGCCCCTTCCATGTCCCTTCT[C/T]TTCAATGCCTCGATTGCAGGAATCATGACATGTTC
N	AX-166502802	Affx-88810236	AX-89779521	Affx-88810236	A	G	SNP	1	2074454	1	1964292	TTAGCTTCTGCTGGTAAAAACCAGCTGTTAAAGTT[A/G]CATCAGCAGCAAGCACCCCAATCCTCACATTACTC
Y	AX-166502803	Affx-88810238	AX-89779523	Affx-88810238	A	C	SNP	1	2080389	1	1958357	TTTATTCTCCAAAATTTGCAGATTTACATTTGACC[A/C]AACCGCCAAGTTAGGTTTAGATGTGGCTTCATGCC
N	AX-89874582	Affx-88810241	AX-89817447	Affx-88810241	A	C	SNP	1	2081942	1	1956804	GGTCCTCCTGGGATGATGGAACACATATCTGGAGG[A/C]AAGGCTAAAGACTGGTCACAAGGAGAGGTAAGAAA
N	AX-166502804	Affx-88810243	AX-89779527	Affx-88810243	T	C	SNP	1	2083921	1	1954824	AGCCCTGAGTACTTTCCCACACTAGATGGAGAGCA[C/T]TGGGAACTAAATAAGGAGTGGCATGATTATGACAA
Y	AX-166502805	Affx-88810244	AX-89779528	Affx-88810244	A	G	SNP	1	2084526	1	1954219	GAGATCATCTAAAGAGGATTTAACTGTCTTTACAG[A/G]ACCCAAGTCCCTTGCTCAGATTAAAGAAGAGAAGA
N	AX-166502809	Affx-88810248	AX-89779537	Affx-88810248	T	C	SNP	1	2091503	1	1947240	TGGGTTTGTACGAGGACATGAAACCCTTCTTCTGC[C/T]TCTTGTCATGGTCATGAAAGGGGGTGTTCATTTCT
N	AX-166502810	Affx-88810249	AX-89779538	Affx-88810249	T	C	SNP	1	2097032	1	1941711	ATAACATTTTCAACTCTGGAAGCTTCCAACCATCA[C/T]TTTCCTGTAGTTCCTTAATAGATGAATATGAACCC
Y	AX-123360073	Affx-88810250	AX-89817463	Affx-88810250	A	G	SNP	1	2097974	1	1940769	AATAACAGGTTTTCTTACAGGCAAAAGGAAATGGC[A/G]CCAAGTAGAGTCACATATGGCAGAGCAGATATACT
N	AX-166520140	Affx-88810250	AX-89817463	Affx-88810250	A	G	SNP	1	2097974	1	1940769	AATAACAGGTTTTCTTACAGGCAAAAGGAAATGGC[A/G]CCAAGTAGAGTCACATATGGCAGAGCAGATATACT
N	AX-166510720	Affx-88810251	AX-89817464	Affx-88810251	A	C	SNP	1	2098001	1	1940742	GAAATGGCACCAAGTAGAGTCACATATGGCAGAGC[A/C]GATATACTTGCTAACTCCCATTTTTCATCAAATCG
Y	AX-166510721	Affx-88810254	AX-89817465	Affx-88810254	T	C	SNP	1	2105228	1	1933514	CGAGATGGGAAAATATCTTGGCATGCCTTTGACCC[C/T]GTATACCAGCTTTGGCAGTCCCTTCCTCCTGTCCC
Y	AX-123614273	Affx-88810256	AX-89803201	Affx-88810256	C	CAAG	Indel	1	2107928	1	1930811	TCGTTGTCATCAAATTCAAGAGCAGAGGCTGCAAC[-/AAG]GAGGCAACTCAACAATGAGAAAATTGCACATATGA
N	AX-123524206	Affx-88810257	AX-89817467	Affx-88810257	A	G	SNP	1	2111456	1	1927283	GCAAACAGAGAAACACCATGTCCGACGAATATGGT[A/G]ATAACAAGTCTCTAATCATTTGTAGCTTTGAAACT
N	AX-166510722	Affx-88810258	AX-89817468	Affx-88810258	A	G	SNP	1	2116692	1	1922046	ATGATCAAGTACTTGGCACTAGATGAGGCTGATAG[A/G]ATGTTGGACATGGGATTTGAACCTCAAATAAGGAA
Y	AX-123524207	Affx-88810262	AX-89817470	Affx-88810262	A	G	SNP	1	2119062	1	1919676	GTTGCGCTGCTTGAAAATGCAGCAGATGCTGATCC[A/G]ATCAACAGCGTCATTACATTTCCGATTTCCTCCTT
N	AX-166502811	Affx-88810272	AX-89779547	Affx-88810272	T	C	SNP	1	2140992	1	1897738	TAGTACGGAAAGAAATGTGATCGAGTCAGGTTTCA[C/T]CCCTTCTTTATCCATCTGGTAGAACAATTCGACCA
N	AX-166502812	Affx-88810273	AX-89779548	Affx-88810273	A	G	SNP	1	2142309	1	1896421	AACTATATCAGTGTAACACATACCATCAAAGATAC[A/G]CATTGCACTATCAAACCTCCCAGCCTTATTGTACA
N	AX-166517596	Affx-88810279	AX-89847024	Affx-88810279	T	G	SNP-SNP	1	2176211	1	1862400	CTATTGCTCAGGACAAGCATTATGCAACATGTATC[G/T]AAAAATGTCGGAGAAGAAACTTACCGCTTTGTACT
Y	AX-123363498	Affx-88810284	AX-89847025	Affx-88810284	A	G	SNP-SNP	1	2182854	1	1855757	TCGCCAGGAAATTTGGCAGGAATGAGTCCATTCTC[A/G]GCAAGATCGACTCTGAGCTTTTAGGCTGCAATGCT
N	AX-89874612	Affx-88810288	AX-89817478	Affx-88810288	T	G	SNP	1	2197638	1	1840971	ATTTGGGTTATCTACAGTCGTGCTTGGAAGTGGTT[G/T]TTTCAAAGAACGTTTTCCAGTTTATATTAGATGAA
N	AX-166502813	Affx-88810293	AX-89779555	Affx-88810293	T	C	SNP	1	2203760	1	1834847	AATTGAACTTCATGTTGGTGATGTCAATAAATCCA[C/T]TCACCTAGAAACATCTCGCAGCATCCTTGCGCATC
N	AX-166510723	Affx-88810294	AX-89817479	Affx-88810294	T	C	SNP	1	2204773	1	1833834	TATGATCCTTGTGCATATCTTTTTCCTCAGAAATT[C/T]AATGCTGTTTATCCCCACTTGAGTAACATTGGCAG
Y	AX-166520141	Affx-88810294	AX-89817479	Affx-88810294	T	C	SNP	1	2204773	1	1833834	TATGATCCTTGTGCATATCTTTTTCCTCAGAAATT[C/T]AATGCTGTTTATCCCCACTTGAGTAACATTGGCAG
Y	AX-123366817	Affx-88810295	AX-89904219	Affx-88810295	T	C	SNP-SNP	1	2204959	1	1833648	TCGCAACTTGTTGAGGTCTGTTTGTTTCTATTGTA[C/T]GTAGTAGTTCATTTGACAAGTTTCCCTTTGGGTTT
N	AX-166502814	Affx-88810297	AX-89779556	Affx-88810297	T	G	SNP	1	2205545	1	1833061	TCTTAGACAAGAATCATCAGAAGCTTTAAGGAGAC[G/T]GTATGATGCTTGTCTGAGATTGGTGTTGTTCATGT
Y	AX-166502815	Affx-88810299	AX-89779557	Affx-88810299	A	G	SNP	1	2206525	1	1832081	AAGATCTTGTCTTACAAACATCAGCAGCTTATCTT[A/G]TCAGGTGCTTGTTCAATCATCTAAGTCCACTTGTC
Y	AX-123363499	Affx-88810303	AX-89847026	Affx-88810303	T	C	SNP-SNP	1	2213551	1	1825051	CTCGCAGGCACCCCTAACTTTGCAGTAGTTTTGAT[C/T]GATAATGATGGGGTTCTTAACAGAGTCCAGGAAGA
Y	AX-166502816	Affx-88810304	AX-89779560	Affx-88810304	T	G	SNP	1	2213970	1	1824632	CCATGACCAGGGCCACATTTAATATATGAGATGGC[G/T]ATATTGGATATATGGTCTCCAATTGATATGCAATC
Y	AX-123360076	Affx-88810306	AX-89817483	Affx-88810306	T	C	SNP	1	2214618	1	1823984	ATTCCACCAGCCGCTTCCTCTTCCATTAATAGTAC[C/T]AGGGCCAGCAATTTCGAGTCCATTAACACCACGAA
N	AX-89874617	Affx-88810306	AX-89817483	Affx-88810306	T	C	SNP	1	2214618	1	1823984	ATTCCACCAGCCGCTTCCTCTTCCATTAATAGTAC[C/T]AGGGCCAGCAATTTCGAGTCCATTAACACCACGAA
N	AX-166502818	Affx-88810311	AX-89779563	Affx-88810311	T	C	SNP	1	2222020	1	1816581	GAAATTGTATGGCCAACTTTTAACTTCTTCAAGCA[C/T]TTGATCTTTGGCATTGTTCCATAATGTACTGATCA
N	AX-89817488	Affx-88810314	AX-89817488	Affx-88810314	T	G	SNP	1	2224848	1	1813753	TCAGCCACTGGTGCAAAGTTGGCTTTTAAGTCTAA[G/T]GAGGAGATAGCAGTTCAAGTAAGGACCGTCCCTCT
N	AX-89874621	Affx-88810314	AX-89817488	Affx-88810314	T	G	SNP	1	2224848	1	1813753	TCAGCCACTGGTGCAAAGTTGGCTTTTAAGTCTAA[G/T]GAGGAGATAGCAGTTCAAGTAAGGACCGTCCCTCT
N	AX-123415575	Affx-88810315	AX-89779566	Affx-88810315	T	C	SNP	1	2224875	1	1813726	AAGTCTAATGAGGAGATAGCAGTTCAAGTAAGGAC[C/T]GTCCCTCTCGATGATGTAATTCCAGAATCTGAACC
N	AX-123360077	Affx-88810316	AX-89817489	Affx-88810316	T	C	SNP	1	2226108	1	1812493	GCAATGCTCCAGCCATGAAGATTATTTTGGCCCAC[C/T]GGTTTGGGAAGGGCCAGCTCTCTCCACCATGATAT
N	AX-89874622	Affx-88810317	AX-89874622	Affx-88810317	T	C	SNP	1	2226144	1	1812457	GGTTTGGGAAGGGCCAGCTCTCTCCACCATGATAT[C/T]ATACAGTTGCTTCCCATTCTGCTCGTCACATAACA
Y	AX-166510724	Affx-88810321	AX-89817490	Affx-88810321	A	G	SNP	1	2231000	1	1807598	CAGGGCAAAGAGACTTCAAGTGATACCTCTGGAAC[A/G]GTTTTCCAAAACTGCACATTTCGGGCAACCTCAGA
N	AX-166520143	Affx-88810324	AX-89874624	Affx-88810324	A	C	SNP	1	2233770	1	1804825	CATGGGCATAGTGGGGTTCATCTTGGAAAACGAGA[A/C]CGTGAAACTTTTGGGCAAGAAATCTGACGACGGTA
N	AX-166502820	Affx-88810327	AX-89779568	Affx-88810327	T	C	SNP	1	2239310	1	1799282	AACAGAATCACGAGCAGCCAATGCAACTATATCAG[C/T]ACATGAAACAATTCCAGGGCACGAGGCCTCTAGTT
N	AX-166502821	Affx-88810329	AX-89779570	Affx-88810329	A	G	SNP	1	2242015	1	1796573	AACGCTGATATAGTGCTTTTCATGTACAAGCTCTC[A/G]ATGTACTCTATCTCTGCAAGTTCCTTGTTCACTCT
N	AX-166510725	Affx-88810333	AX-89817492	Affx-88810333	T	C	SNP	1	2251371	1	1787195	GTTTATAGCATACAGAGATTGCCGAGCAGATAGAC[C/T]GTGATTTACCACGCACACACCCAGATTTGAAATTC
N	AX-166520144	Affx-88810333	AX-89817492	Affx-88810333	T	C	SNP	1	2251371	1	1787195	GTTTATAGCATACAGAGATTGCCGAGCAGATAGAC[C/T]GTGATTTACCACGCACACACCCAGATTTGAAATTC
N	AX-123360078	Affx-88810336	AX-89817494	Affx-88810336	T	G	SNP	1	2252712	1	1785854	TTAACATGGTCTGTAATGATGAGCAAAGTGCTGTT[G/T]CCAGAGCTAATTTGAACCCAGAATTTTCAATTGCA
Y	AX-166510726	Affx-88810339	AX-89817496	Affx-88810339	T	C	SNP	1	2254862	1	1783703	GTGAAGGTACTAAAGAGAGATGGCTTGATGGGTAC[C/T]CATGATGAAGATACCGAAAGTTACTTCCAAGATAC
N	AX-89874629	Affx-88810339	AX-89817496	Affx-88810339	T	C	SNP	1	2254862	1	1783703	GTGAAGGTACTAAAGAGAGATGGCTTGATGGGTAC[C/T]CATGATGAAGATACCGAAAGTTACTTCCAAGATAC
Y	AX-166510727	Affx-88810340	AX-89817497	Affx-88810340	A	C	SNP	1	2254981	1	1783584	CATTGTTCAAGATATAGAGGTTGGAACAATGTTCA[A/C]TCATCACCAGAAGATTGTTGTGGTGGACAGTGAAT
N	AX-166502822	Affx-88810345	AX-89779573	Affx-88810345	T	G	SNP	1	2255816	1	1782749	GAGATGATGTACAAGGACATAACACAAGCTCTCAA[G/T]AACAAGAGCCTTGATGCAAATCCGAAGGAGTATTT
N	AX-123365024	Affx-88810346	AX-89874633	Affx-88810346	A	C	SNP	1	2255894	1	1782671	TTCTGCCTTGGAAATCGTGAGAAGAAGCGAAGCGG[A/C]GAATATGAACCTCTTGAGAAACCAGGAAATGGAAC
Y	AX-166520145	Affx-88810347	AX-89817500	Affx-88810347	A	G	SNP	1	2256131	1	1782434	AATGCCTGCATTTTGCAGTTGATGATGAATACATA[A/G]TCATTGGATCCGCCAACATAAATCAGAGATCAATG
N	AX-166502823	Affx-88810348	AX-89779574	Affx-88810348	T	C	SNP	1	2256362	1	1782203	AATGTGTGACAAAGGTGAACCAGATTGCCGAAAAG[C/T]TATGGAAACTATATACAAGTGAAACCTTAGAGGGT
N	AX-123360079	Affx-88810349	AX-89817501	Affx-88810349	A	G	SNP	1	2266500	1	1772060	TTAACCCGGTTTTTAACAGAGCAGTGGTTGTTTTG[A/G]ATGCTGCACTAAACCCACACCGATTATTGCTGTCG
N	AX-166520146	Affx-88810349	AX-89817501	Affx-88810349	A	G	SNP	1	2266500	1	1772060	TTAACCCGGTTTTTAACAGAGCAGTGGTTGTTTTG[A/G]ATGCTGCACTAAACCCACACCGATTATTGCTGTCG
N	AX-166510728	Affx-88810351	AX-89817502	Affx-88810351	A	G	SNP	1	2276091	1	1762469	ACAAGATCTTTGGAAGGGAAGAAAGCAACAGATGT[A/G]AGACTTGCTGCTATTGCTGTTGGAACCAGTAGCCG
N	AX-166502824	Affx-88810354	AX-89779575	Affx-88810354	A	G	SNP	1	2276850	1	1761710	AATGGACTGCTTGCTTTTTCCAAAGCAGTAGGATC[A/G]CTTGAGAGCCTGCAACTGGAGGAGTGTAACAGGGT
N	AX-166510234	Affx-88810360	AX-89813144	Affx-88810360	A	G	SNP	1	2289049	1	1750091	GTATCACCAGCTGCCTTTCGAACATCTACCATGAA[A/G]AGGGATGGTGCAACTTCGAAAATCTACATGAGGTA
N	AX-166510093	Affx-88810362	AX-89809122	Affx-88810362	A	G	F.innumae-derived	1	2290052	1	1749088	GTAATCATCTCAAATGCATTCATTAATAAAGGACC[A/G]CTGTCTTTATTATCTGTTCTTTCTTCTGCATATTG
N	AX-166510729	Affx-88810363	AX-89817506	Affx-88810363	T	G	SNP	1	2291071	1	1748069	ACGACCAAACATCAGCAGCTGCACCATCATAACCT[G/T]TACTGCCCAGCACCTGTTTGCCAATGATACATAAT
Y	AX-166520147	Affx-88810363	AX-89817506	Affx-88810363	T	G	SNP	1	2291071	1	1748069	ACGACCAAACATCAGCAGCTGCACCATCATAACCT[G/T]TACTGCCCAGCACCTGTTTGCCAATGATACATAAT
Y	AX-166510438	Affx-88810368	AX-89816245	Affx-88810368	A	G	SNP	1	2303025	1	1736110	CAGACCAAGAAAATGTGGTCTCAAATGCTTGAATG[A/G]AGGAAGGAATTCGGAGCTGACACAATCAGAGATGA
N	AX-166510480	Affx-88810369	AX-89816429	Affx-88810369	T	C	SNP	1	2304174	1	1734961	GCAGATTTCCAGTCCATCATTACACGCATTGCAGA[C/T]TTGGAAGAGAGAGCCATTGTTTTGAGCACGAAACC
N	AX-166510730	Affx-88810371	AX-89817507	Affx-88810371	T	G	SNP	1	2305086	1	1734049	CCAAGGAACACAACCATTACAATTGCAGATAGTTC[G/T]GCTTCTGGAACTGGTACTAGTTTTGGAACTGTCAT
N	AX-166520148	Affx-88810372	AX-89817508	Affx-88810372	A	G	SNP	1	2305202	1	1733933	TGTGAGAAAGATCATAGGGACTTCAGTTTTCAACC[A/G]TGTTGGTCCATGGAGGCAAGCAGTGAAGATTGGAT
Y	AX-166510731	Affx-88810373	AX-89817509	Affx-88810373	T	C	SNP	1	2305804	1	1733331	TATAATTTGCATGGTACCTGAAGAAGCAGTGCCAG[C/T]AAAAACAGCCTGCATATACTTTTTGGGAAGCTTTC
N	AX-166520149	Affx-88810375	AX-89817510	Affx-88810375	A	G	SNP	1	2305856	1	1733279	TACTTTTTGGGAAGCTTTCCTGCTGATCCCATTAA[A/G]CTTCCACCTACCAAGCCATCAGCTAAGCCACATAT
Y	AX-166517489	Affx-88810381	AX-89846681	Affx-88810381	T	C	SNP	1	2321895	1	1717790	TTAAAGTCGAGTAGAAACAATCCTCTAAGCATAAC[C/T]GGTGACAGGTACTGAAAACATATGAAGAAGAAAAA
N	AX-123365025	Affx-88810385	AX-89817511	Affx-88810385	A	G	SNP	1	2326202	1	1713517	GTTGGGGTGGGGATCATACTCCAAAACCATGACTT[A/G]AGTTACGGATCTAGCATCTTTAACAGATTCCTCTA
Y	AX-123365026	Affx-88810391	AX-89874647	Affx-88810391	T	G	SNP	1	2339358	1	1700318	ACCAGGCGAATGTGAAGCCAGAGCTCTATCATTGT[G/T]CTCTTGGATGTGCATATAAATCTTCTGCTGAAACA
N	AX-166517795	Affx-88810392	AX-89847854	Affx-88810392	T	C	SNP	1	2340344	1	1699329	CAAGTAATCATCTGTCTGTTTAAAGTCCCTTAAGC[C/T]GGCCACCTAGCCCGGTTAGTGCTGTCCATTTCTCG
Y	AX-166518001	Affx-88810401	AX-89848891	Affx-88810401	T	C	SNP	1	2357331	1	1681751	ATGTTAAGCAGCAGTACATGAAGCCACTTTTGCAG[C/T]TCTTCTCAGAAATTGGTTCTCCCTTCTGTCTGAAT
N	AX-166520150	Affx-88810403	AX-89817519	Affx-88810403	A	G	SNP	1	2357703	1	1681379	CCCCTCTCCGGCCACATTTTGTAGTGAAGGCATAC[A/G]TATTTGCCATATTTAATGAGAACTTGAAACCCGGC
N	AX-166520151	Affx-88810404	AX-89817520	Affx-88810404	A	G	SNP	1	2357789	1	1681293	AATTTTGGACTGTTCAAGCCTGATGGAACCATTTC[A/G]TATGATATTGGGTTTCATGGACTTGTATCATCATC
Y	AX-89849330	Affx-88810406	AX-89849330	Affx-88810406	A	G	SNP	1	2359980	1	1679102	CTGAGCACTGTGACCAAGGAGGACAGAAGTTAACA[A/G]TCGCTGTCACTGGCGATTCCGGCTCTGCACCTAGG
N	AX-166509130	Affx-88810407	AX-89803204	Affx-88810407	G	GGCT	Indel	1	2362961	1	1676114	ATCCAAACGGTCTGAATCTTCAAGCATGTATACGG[-/GCT]GCTGGTAGTAGTTTTCCACGTCAATCTTCCTTTTC
N	AX-123360083	Affx-88810418	AX-89817527	Affx-88810418	A	G	SNP	1	2372918	1	1666411	TATCTCCACTCTCAAGGTTCAATCGTATTCGCGGT[A/G]CAGCTTTGCAAATGCAACGAGAACTACATTGGTTC
N	AX-89815275	Affx-88810421	AX-89815275	Affx-88810421	T	C	Indel-SNP	1	2376773	1	1662553	CAAAATTACATGAACGTAGGTTCACTGCTCGTAAC[C/T]TTGTCTGAGTTTGTGCAGTTTTGAAGCCCTAAACA
N	AX-166510733	Affx-88810422	AX-89817529	Affx-88810422	A	G	SNP	1	2377908	1	1661418	GATTTTGACAGTTGTACCACCACAAACCCGATATG[A/G]AAAAATTCATATGCAATAAACTATGCGCCTGGTTA
N	AX-166518178	Affx-88810425	AX-89849794	Affx-88810425	A	C	SNP	1	2382750	1	1656571	ATTGCTGCAGATGCTATAACAGCAACTATAACATT[A/C]ATGATCTTCACCATGATCTCTTGATGCTCTTATTT
N	AX-166519455	Affx-88810440	AX-89811594	Affx-88810440	C	G	SNP-in-Insertion	1	2401293	1	1638034	ATCACAGCTGCGAGCTTATTCAACGTTCATGATTT[C/G]CAAGGGCACGCAACATGTTTTCATAACTGTTCAAA
N	AX-89811594	Affx-88810440	AX-89811594	Affx-88810440	C	G	SNP-in-Insertion	1	2401293	1	1638034	ATCACAGCTGCGAGCTTATTCAACGTTCATGATTT[C/G]CAAGGGCACGCAACATGTTTTCATAACTGTTCAAA
N	AX-123365027	Affx-88810441	AX-89817536	Affx-88810441	T	C	SNP	1	2404010	1	1635315	TCATAAGCAGTCTTAGTAGGAAAGAAACAGAACTC[C/T]TTACTTATAGATGGTGAATAATTGTGGAGCTTTCC
N	AX-123365028	Affx-88810442	AX-89874669	Affx-88810442	T	G	SNP	1	2404338	1	1634987	CATTCTCTGGGACCTGTAACTGTGGTGCTTCAGTT[G/T]GATAGCTAAATCCATGATACAATGGATATACTGAA
N	AX-166510736	Affx-88810443	AX-89817537	Affx-88810443	T	C	SNP	1	2404367	1	1634958	TCAGTTGGATAGCTAAATCCATGATACAATGGATA[C/T]ACTGAACCTAAGTTCAATTGGTTGTTGGTTGATAT
Y	AX-166510737	Affx-88810444	AX-89817538	Affx-88810444	A	G	SNP	1	2404497	1	1634828	GGCTACTCAGGTTACTACTCTGGTTGGCATGACTA[A/G]GGGATTCTGGGACCAAATGTGCAGAATTCACAGTT
N	AX-89874671	Affx-88810444	AX-89817538	Affx-88810444	A	G	SNP	1	2404497	1	1634828	GGCTACTCAGGTTACTACTCTGGTTGGCATGACTA[A/G]GGGATTCTGGGACCAAATGTGCAGAATTCACAGTT
Y	AX-123365029	Affx-88810445	AX-89817539	Affx-88810445	A	G	SNP	1	2404712	1	1634613	CTGTGTCGTTGGCTTCTTGAAGCTCTTACAGCAAC[A/G]CAGCCCAAATTAAGCGCAGCTGGCACAAAGAGTCA
N	AX-89817540	Affx-88810446	AX-89817540	Affx-88810446	T	C	SNP	1	2410413	1	1628904	GGAACCTTCTGCTAACGAGATGCCTGAATGTCAAT[C/T]TGAAAGAGATAGAGTGAGAAGACTCCTTCTCCCCA
N	AX-89874673	Affx-88810446	AX-89817540	Affx-88810446	T	C	SNP	1	2410413	1	1628904	GGAACCTTCTGCTAACGAGATGCCTGAATGTCAAT[C/T]TGAAAGAGATAGAGTGAGAAGACTCCTTCTCCCCA
N	AX-89803620	Affx-88810460	AX-89803620	Affx-88810460	A	G	SNP	1	2431988	1	1607294	TTGCAAAACATCGGCAAGCTATATTCTGATGCGCC[A/G]GATTCTCCTTTCTCCGCTGTGGAATTTGATAATCC
N	AX-89874676	Affx-88810461	AX-89817544	Affx-88810461	T	C	SNP	1	2432117	1	1607165	GATGATGGGAAAGTTTGGAACTGGCTCTTGACTGC[C/T]GAAGGTGAATACAATCACAAGGATGATAAAGACTT
N	AX-89874677	Affx-88810463	AX-89817546	Affx-88810463	A	G	SNP	1	2432961	1	1606321	CTTTCTTCAGCAGTGACTATGCTAGCTGTACCTTC[A/G]CCTTCTTCAACAGCTACTTTGGGCCGTGAGTTCAA
Y	AX-166510738	Affx-88810465	AX-89817548	Affx-88810465	A	G	SNP	1	2435103	1	1604179	CAGAATTAAGTTCTCACCTGTTGTTCCTGGAGACC[A/G]TAGTAGGGGGCGTGTTGCTGTACTATTTTATGACA
N	AX-166510739	Affx-88810466	AX-89817549	Affx-88810466	T	C	SNP	1	2435929	1	1603355	GCTAATTCTCTCTTACACCCTCAATTTCCTGGAAC[C/T]CTTGTTTTGGAACTTGATTGGTTGCCTTTGCGAAC
N	AX-166502453	Affx-88810467	AX-89805693	Affx-88810467	T	C	SNP	1	2436854	1	1602429	TGTGGTACCAGAGTTGCTGCTTAAAGTATTAGAAC[C/T]TTATCGAAAAGAGGGTAGGTCTTGTCTCTAGTGAA
Y	AX-123365030	Affx-88810470	AX-89817551	Affx-88810470	A	G	SNP	1	2439249	1	1600034	AGTTGGTGCATCTTTGCATGGACTCTCAGCCATAT[A/G]CTGAATGAACACCATTGTCTCGTCACTCGGTTGGA
N	AX-166519456	Affx-88810474	AX-89867484	Affx-88810474	A	T	SNP-in-Insertion	1	2445224	1	1594040	CAAATACAAAAGACCATCGTTAGAAAAATTAGAGA[A/T]CACTGTCCAAAGCAGAAGAAAAAGAAAAGAGTTTG
Y	AX-166510740	Affx-88810478	AX-89817553	Affx-88810478	T	C	SNP	1	2447339	1	1591924	GAAGGCTGCTTAGATGGTACAGGTAGGAGTGTTCC[C/T]CCTTTGATGTCATCGGAGTTTGTCATGCCATTCAG
N	AX-166510212	Affx-88810479	AX-89812124	Affx-88810479	T	C	SNP	1	2447518	1	1591745	AGTGTATACCTGTTCTTCCAGATCAAGTATCTTCT[C/T]GTCTCTTAACCTCATTGTCATAGCTTCCCTAAAAG
Y	AX-166510741	Affx-88810481	AX-89817554	Affx-88810481	A	G	SNP	1	2449081	1	1590182	ACACAAACCCAAGGATTCTCCATTATTCCACAGAC[A/G]GAGCAAGCTGGATTGTTATCCTGCTGTTGACACAA
N	AX-166520153	Affx-88810481	AX-89817554	Affx-88810481	A	G	SNP	1	2449081	1	1590182	ACACAAACCCAAGGATTCTCCATTATTCCACAGAC[A/G]GAGCAAGCTGGATTGTTATCCTGCTGTTGACACAA
Y	AX-166510742	Affx-88810484	AX-89817555	Affx-88810484	T	G	SNP	1	2459237	1	1580022	CAAAGTTAACAATGCCCGGGTATGTCGTAGGGCAC[G/T]TTGTGTTCGGCCAAGTTCACAATTTAAAAAGGTCA
Y	AX-123360087	Affx-88810488	AX-89817557	Affx-88810488	T	C	SNP	1	2463139	1	1576119	AGTCTTCCAGTTGAAGTGACTCCAAGTTTGCACAA[C/T]AGTTTACATCCAGCACATTGAGAGGATCTCTCAAA
Y	AX-166510743	Affx-88810490	AX-89817559	Affx-88810490	T	G	SNP	1	2463577	1	1575681	CCTCTGGTTCGCTGCTTTTCTCATCCTCCAGTTGA[G/T]ACACCTGATCAGACGTTATTGAGGCAACGGCCAAT
N	AX-166520154	Affx-88810490	AX-89817559	Affx-88810490	T	G	SNP	1	2463577	1	1575681	CCTCTGGTTCGCTGCTTTTCTCATCCTCCAGTTGA[G/T]ACACCTGATCAGACGTTATTGAGGCAACGGCCAAT
Y	AX-123360089	Affx-88810491	AX-89817560	Affx-88810491	T	C	SNP	1	2463608	1	1575650	TTGAGACACCTGATCAGACGTTATTGAGGCAACGG[C/T]CAATCTGTTGAGTCTCTTCCACATGTCGACTTCTT
Y	AX-123360090	Affx-88810492	AX-89817561	Affx-88810492	A	C	SNP	1	2463787	1	1575469	AACTCGATATAACACCGGGTGAGATTTCTTTAAGC[A/C]TGCTACATCCCTTCAAATTCAAGAGTCTCAGATTG
Y	AX-123360092	Affx-88810494	AX-89817563	Affx-88810494	A	C	SNP	1	2465756	1	1573500	GAGATTCAGTGGTGCAAGGGGATTAGTAGGGTTGG[A/C]TGTTCCTAAGGAGGAGCTAGCCGCTTCATGGGGCT
N	AX-166520155	Affx-88810497	AX-89874692	Affx-88810497	A	G	SNP	1	2468906	1	1570358	TGGTGCTAGGCCCAGCACCATTTTCAGTTGGAGGG[A/G]AGGTGCCCCATTTTCCTTCTGATTCTAATGGCTCA
Y	AX-89817564	Affx-88810499	AX-89817564	Affx-88810499	T	C	SNP	1	2472043	1	1567221	TTAACATTGTCCATGTCCCAGAATTTAACCATGAA[C/T]TCATCACCAGTAGCCAGGAATCGATTCTTGGTGGT
Y	AX-166510219	Affx-88810500	AX-89812277	Affx-88810500	T	C	SNP	1	2472355	1	1566909	CTAGTTCCATCAGCACTGTATGCCATAGTGGTAGA[C/T]GAATGTCCTGGTGCATCATAGTCAACTCTTGAGCC
N	AX-89817565	Affx-88810503	AX-89817565	Affx-88810503	A	C	SNP	1	2474019	1	1565243	AACACCCGGCAGAATAGTTACTGGCAGATTGTTTG[A/C]CTGTTGCAACAAATAAAGTTAATAGAAGACCAATC
Y	AX-89874694	Affx-88810504	AX-89874694	Affx-88810504	T	C	SNP	1	2474512	1	1564750	CCATAGCTGGGTTATTGGTAGGAGGAGTTCTAGGG[C/T]GCTTTAAAAGGGCTCCTATCATTTTAAACGTAATT
N	AX-166510744	Affx-88810506	AX-89817566	Affx-88810506	A	G	SNP	1	2476090	1	1563169	GCGTGATTTCCTTAAAAAGCTCTTCATTGAATGCC[A/G]CAAACACCTTCAAGTCCTTCACTAAAATATCCACA
Y	AX-166510221	Affx-88810508	AX-89812459	Affx-88810508	A	G	SNP	1	2484321	NA	NA	CATTGAGGAGTTTGTGTTCAAGATGAGTGCTTATA[A/G]CCACGCAGACCGTGTGTGGCGGAGAGATTTTCTGG
Y	AX-123524211	Affx-88810511	AX-89817569	Affx-88810511	A	G	SNP	1	2491887	1	1546582	TTCGCCTCGATGATCAAAAACTTTGTGACATATGG[A/G]TCAAGTTCATGCCACCTGATATCAAGCAAGTCTAA
N	AX-123363501	Affx-88810513	AX-89847031	Affx-88810513	T	C	SNP-SNP	1	2492598	1	1545871	CAAGTCTCACTTTAACAAGCTTTATGGAACAGTTC[C/T]AAAACATAGTCCAAATTCATAATAATAGTAATAAT
Y	AX-166510222	Affx-88810515	AX-89812505	Affx-88810515	T	G	SNP	1	2504982	1	1533148	AACCTGTGGAAGCCAGAGGAGGATTTGATTCTCAA[G/T]AAGTACGTGGAGACTCATGGTGAAGGAAACTGGGC
N	AX-166520156	Affx-88810516	AX-89874700	Affx-88810516	A	C	SNP	1	2505210	1	1532920	TCAAACGTGGAGATATGTCCGAGGAGGAGGAAGAC[A/C]TCATTATCCGAATGCATAAGCTCCTTGGCAACCGG
N	AX-166510225	Affx-88810518	AX-89812597	Affx-88810518	T	G	SNP	1	2505952	1	1532178	CCACATGGATTCTTTTCTCTTGCTCGAAGCAGCAT[G/T]TGGATGCACTACCGCTGCTGCTGCTGCTACTGAGG
N	AX-166510226	Affx-88810519	AX-89812640	Affx-88810519	A	G	SNP	1	2507319	1	1530811	TTCAAGCAGTCACGCTGTGTAAAGTAATTATGCAA[A/G]GGGCTATCTAACATCTCCACCAACTGCAAAAGCAA
N	AX-166510227	Affx-88810520	AX-89812714	Affx-88810520	A	G	SNP	1	2509807	1	1528322	CTCTCATTATATTGAGAAATTGTATAATCATTTTG[A/G]ACATCCTCACTTTTTCTCTCCTGCATTTCATCTAG
N	AX-166510746	Affx-88810522	AX-89817574	Affx-88810522	A	G	SNP	1	2511269	1	1526860	ACGATGATAATGTACTGCCATCCAAGTGCAGGAGT[A/G]TGGCGCCGAATGGACCGAACCTCTGTCAACGGCAC
N	AX-166520157	Affx-88810523	AX-89817575	Affx-88810523	T	C	SNP	1	2511454	1	1526675	GAACCTTTCTCAGAAACCCTAGCATTGGTGTTTTG[C/T]CCCTTGTACGGAATCCACGTCTACAATTCACACCA
N	AX-123366819	Affx-88810525	AX-89904222	Affx-88810525	T	C	SNP-SNP	1	2514738	1	1523387	AATGGTTTAGCTGAGCGTAAGCATCGTCATATCGC[C/T]AACATGGTTCGTACTCTTCTTGTTACCTCTCATGT
N	AX-166510747	Affx-88810535	AX-89817580	Affx-88810535	T	C	SNP	1	2544512	1	1493562	ATTGGGTTTTCTTTATAGGAATACACTGCAAAGCT[C/T]TCAGATTTTGGTTTGGCTAAAGCTGGGCCGCAAGG
Y	AX-89812891	Affx-88810539	AX-89812891	Affx-88810539	A	G	SNP	1	2558697	1	1479374	ATCATAATCCAAACCCAAACTCATTATGAAGATCC[A/G]GAGACACCTTTCCCGGAATTTGAAAACAATAAGGC
Y	AX-166510748	Affx-88810545	AX-89817584	Affx-88810545	A	G	SNP	1	2560521	1	1477550	ATGGCTCGTGACATGTTATCATTTCCGGTATCTAC[A/G]GTTCCTTGTGACTCAGTTTTTGATACCAATGCAAA
N	AX-123360094	Affx-88810546	AX-89817585	Affx-88810546	A	C	SNP	1	2560568	1	1477503	CTCAGTTTTTGATACCAATGCAAAAGAGATGGATC[A/C]GTACAGGAGTTCCTTGCAAGCGGAGACAGTGGAAG
N	AX-123482020	Affx-88810551	AX-89779581	Affx-88810551	T	C	SNP	1	2569063	1	1469404	TTTAACATGGTGAGCTTCAATACTGTCCAAGGTGA[C/T]TGTGTTGCAACTTACCTAACGGAAAAGCAAAACCT
N	AX-123360095	Affx-88810556	AX-89817590	Affx-88810556	A	G	SNP	1	2570079	1	1468388	TCCAACGTTTATCAAGATTGTTGATGATGGAATTC[A/G]TGAGCTCTTTCATGAATATTTGACACTGCCTTTGC
N	AX-166502825	Affx-88810559	AX-89779585	Affx-88810559	A	C	SNP	1	2571808	1	1466659	CTGTGTACTTATTCATGTTCCATATCTTCAACAGA[A/C]TCAACCCATCCCGGGCCGGGTCAGTGAACAAGCAG
Y	AX-123357016	Affx-88810561	AX-89779587	Affx-88810561	A	C	SNP	1	2583728	1	1454737	CTGAAAATTCCTGAGAAAACATTTTCAGATCACGA[A/C]TCACAAGTTCAGATTGCTTCCCAGGTACTTATAAA
Y	AX-166520158	Affx-88810564	AX-89817593	Affx-88810564	T	C	SNP	1	2590827	1	1447635	TGTGTTAAAGTGCTTGTTTATTTGCAGAAAACTGC[C/T]CTCAATATTTGTCTTCTGTTGCTGGATGTGGGGCT
N	AX-166502827	Affx-88810565	AX-89779589	Affx-88810565	A	G	SNP	1	2591591	1	1446871	GTGTGAGTTGTATGAATCAGGGAGACAATGGAAGC[A/G]GTGTGTCGCAGCAACCTCCAAACACAGTGGCCAAG
N	AX-166520159	Affx-88810567	AX-89874721	Affx-88810567	T	C	SNP	1	2592332	1	1446130	GACCTCTGTTGTGGCTTCGGCTTGCTGAATGCTGT[C/T]TGATGGCTGTAGAGAAGGGACTAGTCAAAAACAGT
N	AX-123360096	Affx-88810575	AX-89817602	Affx-88810575	A	G	SNP	1	2610053	1	1428436	AAGCTTACAAAAAGAGTATTTTTATACCTCCTTGC[A/G]AACTGTTGAGACACGGGGAGCTTCTCTGACGTACT
N	AX-166502828	Affx-88810577	AX-89779591	Affx-88810577	A	G	SNP	1	2611410	1	1427079	CAAAAACAACGCATAAGTACGGATCCAGGTTGAAT[A/G]ATCCCATGCTGCAAAGTGAAATGGTCAGCCTTTGA
N	AX-89817605	Affx-88810580	AX-89817605	Affx-88810580	T	C	SNP	1	2616917	1	1421571	ACCGTTGCAAGTCCTTCTGCAAGACATATTTGACA[C/T]TGAAGAAACAAGATTGCAGGTGGAATCCTAATATC
Y	AX-123357017	Affx-88810582	AX-89779594	Affx-88810582	T	C	SNP	1	2619414	NA	1419073	ACCTCTCCCTTGAGGACGTCTCATGCAAGTAAGAA[C/T]GTGATAGAAATGCTGCAAAATAAAGACGCCAGCTC
N	AX-123357018	Affx-88810583	AX-89779595	Affx-88810583	T	C	SNP	1	2620388	1	1418099	GCTGTTGGAGTACTTTACTTCATGAGTGCGTGCAT[C/T]TGAGACAACTGAAATGACTGTCTTGCAGGTTACTC
N	AX-89817606	Affx-88810584	AX-89817606	Affx-88810584	T	C	SNP	1	2620466	1	1418021	TTTGCAATACGAATGCAGTAATGCATGTGAAGATG[C/T]CCTATCAGGCCTCATAAGATAGATGCAAGAGAAGA
N	AX-89874728	Affx-88810584	AX-89817606	Affx-88810584	T	C	SNP	1	2620466	1	1418021	TTTGCAATACGAATGCAGTAATGCATGTGAAGATG[C/T]CCTATCAGGCCTCATAAGATAGATGCAAGAGAAGA
N	AX-166510749	Affx-88810586	AX-89817608	Affx-88810586	T	C	SNP	1	2620995	1	1417492	AATAGGAACTGGTGCCGCACCATCCTCAATTGCTT[C/T]GTCAACAGAGTAGTATTTACAAACGATACCCGAAT
Y	AX-166520160	Affx-88810586	AX-89817608	Affx-88810586	T	C	SNP	1	2620995	1	1417492	AATAGGAACTGGTGCCGCACCATCCTCAATTGCTT[C/T]GTCAACAGAGTAGTATTTACAAACGATACCCGAAT
Y	AX-123357019	Affx-88810588	AX-89779597	Affx-88810588	A	G	SNP	1	2622328	1	1416160	AACCAGTGTCGTATTTGCCCTAACATGGATTTGCA[A/G]GCAGATCATAAAAGAAAGAGAAAGAAAGAAAAGAA
N	AX-166518989	Affx-88810589	AX-89862664	Affx-88810589	C	CCATG	Indel	1	2622926	1	1415562	AGCATGTAGCTCATACGTGCCTTTGCCTCGTACTC[-/CATG]CATGTCTCTTGCTTCATGGAATAACACAAAATTCC
N	AX-166509131	Affx-88810595	AX-89803209	Affx-88810595	T	TCTTC	Indel	1	2628329	1	1410154	TTTGTATATAGCTGCTCGTGCTTCAGCCAGACCTT[-/CTTC]TTTTTTCTCTAACACACTTTTTTCTTTCTAAACAA
N	AX-166518990	Affx-88810598	AX-89862666	Affx-88810598	T	TCATG	Indel	1	2629886	1	1408601	CATGTATTGCGTGCCATATGTCTTAATTTGTGCAT[-/CATG]CAATCCACTTTTAATATGTAAACGCAGCATTTTTA
N	AX-166520161	Affx-88810600	AX-89817611	Affx-88810600	A	G	SNP	1	2630269	1	1408218	ACTTGTATCGAAAATTGGCTCCAATCAAGTACATC[A/G]CTGAAGGGTAATGAGTAGTTGTCAGAAATTAACAC
N	AX-166502829	Affx-88810603	AX-89779599	Affx-88810603	A	G	SNP	1	2631695	1	1406792	ACACTAGAGAAATACTGAGATAGTTTCCAGACGAT[A/G]AAGGTGTGAAGATTAGGAGGAAGAACAGAAGACAA
Y	AX-123357020	Affx-88810604	AX-89779600	Affx-88810604	T	C	SNP	1	2633750	1	1404737	GTACCACTAGGGCACAAGCAAAACTTGCTATGTTC[C/T]ATTAGTGCGGTGTAGTTCATGCTTTCGGGAACAGT
N	AX-166518991	Affx-88810605	AX-89862667	Affx-88810605	C	CTTAA	Indel	1	2633800	1	1404687	TTCATGCTTTCGGGAACAGTCTCGTAGACTTGAAC[-/TTAA]TTTGTTATCTTTGCCCTTCCAATGATGGAGCAAGA
N	AX-166520162	Affx-88810606	AX-89817614	Affx-88810606	A	G	SNP	1	2634250	1	1404237	CGTACCCAGTCATGACATGAAACCATAAAATGGTC[A/G]GCACCATTGGTTCTATTCCAGTACGGGTACTTATG
N	AX-166510750	Affx-88810608	AX-89817616	Affx-88810608	A	G	SNP	1	2637154	1	1401332	AGCTAGACAGCTTCGGGGAGAACAGTGTGATGATG[A/G]TGCAGAGTCCCATTAGTGTGATGCCGCCGAGGTAG
Y	AX-166510751	Affx-88810610	AX-89817617	Affx-88810610	A	G	SNP	1	2637623	1	1400863	AATTATGGGAAACATTTGTAGCTGCACTAAATGTG[A/G]ACCTGCATAGTATATCAAACACATACGAATCAGAC
Y	AX-166510752	Affx-88810616	AX-89817619	Affx-88810616	T	C	SNP	1	2642022	1	1396463	TGGGGAATCCGATTCTGAAGATTCTGCTCCATCAT[C/T]ACTTCTTTGCCACTGTGGATGCCTTGCTTTGCAGC
N	AX-166520163	Affx-88810616	AX-89817619	Affx-88810616	T	C	SNP	1	2642022	1	1396463	TGGGGAATCCGATTCTGAAGATTCTGCTCCATCAT[C/T]ACTTCTTTGCCACTGTGGATGCCTTGCTTTGCAGC
Y	AX-123357021	Affx-88810617	AX-89779603	Affx-88810617	A	G	SNP	1	2642125	1	1396360	GCAGGCCATGAGTATAGGTGAATGTTCTTCAACCC[A/G]TTCTGACGACATCTTGCCCAGAGATGTTTATCTGC
N	AX-89874739	Affx-88810619	AX-89817620	Affx-88810619	T	G	SNP	1	2644762	1	1393723	TTGTTCACCCAAAACTTTGGACATTTGTATTACAT[G/T]GTTCAATGCACCATCAACAAATTCGGGAATGTGTG
Y	AX-166510753	Affx-88810621	AX-89817621	Affx-88810621	T	C	SNP	1	2644976	1	1393509	CAATCTACGTCAGGTGATGACACTTGTCTAGTTAG[C/T]AGATCAACTCGATACACTCCTGGCATGCTACCCAA
N	AX-166520164	Affx-88810621	AX-89817621	Affx-88810621	T	C	SNP	1	2644976	1	1393509	CAATCTACGTCAGGTGATGACACTTGTCTAGTTAG[C/T]AGATCAACTCGATACACTCCTGGCATGCTACCCAA
Y	AX-166518624	Affx-88810623	AX-89860579	Affx-88810623	T	TTATG	Indel	1	2645437	1	1393044	CTAGGTGTACTATGCTACACAAACCACGCTGAAGT[-/TATG]TTCACCTTATTAAGACGATATATAACTTCTTCCCC
N	AX-166520165	Affx-88810629	AX-89817623	Affx-88810629	A	G	SNP	1	2659417	1	1379062	CAATTGCTAGCAATCCCTGCCTCCGGATTAGTCTT[A/G]CAGTCAAAGGTTTGTAAGGATCAGTTTGCCCATGC
Y	AX-123404894	Affx-88810631	AX-89779608	Affx-88810631	T	G	SNP	1	2659919	1	1378560	TTTGCCCCTGCTTTTATAAGAAAAGGAGAGAAGCT[G/T]CTCACAATGTTCTTGATGAGGACGTGAATTCAAGT
N	AX-166519457	Affx-88810636	AX-89867487	Affx-88810636	T	G	SNP-in-Insertion	1	2662342	1	1376138	TTCCCCTAGTTAACAATAATGTTGTTTGCTAGCAT[G/T]ATATAAACTACTGGTCTTTAGCAGCTCTTGACCTC
N	AX-89779612	Affx-88810641	AX-89779612	Affx-88810641	T	G	SNP	1	2664301	1	1374178	TGTAAATTCGGAGAACTTTTGTTAATAGATAATTG[G/T]AGAAGCTCCCCAATATACCACCTACAAATGCAAGG
Y	AX-166517597	Affx-88810647	AX-89847037	Affx-88810647	A	G	SNP-SNP	1	2679644	1	1357427	GCAGCTTCTGAGCTGATCAAGGCTTCAGTAGAGCC[A/G]ATTCTGGAGCAGTATACGCCGGTCATATTGTCCTC
N	AX-166510754	Affx-88810655	AX-89817632	Affx-88810655	T	C	SNP	1	2685694	1	1351377	ATGTGCGTCATTACTATTGTAGATTGGAACATGCA[C/T]AAGGACTATCAGCCAAGGTGTCTTTTCCCTGTCAA
N	AX-166502830	Affx-88810656	AX-89779617	Affx-88810656	A	G	SNP	1	2685886	1	1351185	TATAGGTGTTGGAAGTAATTACCAAATGGAGAATA[A/G]CTGGAAAGTACTATTATATGAGCTGAGGCACGTCT
Y	AX-123357022	Affx-88810661	AX-89779620	Affx-88810661	T	C	SNP	1	2693116	1	1343953	CTTCTTGTTGCTGTGAAAAGTATAGATGGTATCTT[C/T]ACCGGCAGATTGAACATCAAGACCTACAGAATGTA
N	AX-89817634	Affx-88810663	AX-89817634	Affx-88810663	A	C	SNP	1	2693868	NA	NA	CATCACCTAGAACTTTTGTACAAATGCATAGTAAC[A/C]AAAACTGAGATTTCCAAACCTGACCATTTGGAAGT
N	AX-89874752	Affx-88810663	AX-89817634	Affx-88810663	A	C	SNP	1	2693868	NA	NA	CATCACCTAGAACTTTTGTACAAATGCATAGTAAC[A/C]AAAACTGAGATTTCCAAACCTGACCATTTGGAAGT
N	AX-89874753	Affx-88810668	AX-89874753	Affx-88810668	A	C	SNP	1	2700372	1	NA	GAATTAATTGTAGCACTCTTCCCCACTCCTGTTTT[A/C]CCAAGGACAAGGATTCTCAAAGAAAAATCCAAATC
N	AX-166502831	Affx-88810669	AX-89779624	Affx-88810669	T	C	SNP	1	2700402	1	NA	GTTTTCCCAAGGACAAGGATTCTCAAAGAAAAATC[C/T]AAATCAGGAGGGCCAGCTGCTTCTTGTTCTGCTGT
N	AX-166520168	Affx-88810679	AX-89874757	Affx-88810679	T	C	SNP	1	2825654	1	1209649	TGCAGAGACCGGCCGATCTACGTAAGGGTATCGTG[C/T]TGCAGGGACAACAATTCATATTGCTGGTACGTGAT
Y	AX-166510755	Affx-88810681	AX-89817638	Affx-88810681	T	G	SNP	1	2825976	NA	NA	CCGATTCAAATTTGCGCTACAACAGCCTTGCCGTC[G/T]TAGACTCTCATATATATCTGATTGGTGGAGATATC
N	AX-166520169	Affx-88810684	AX-89817641	Affx-88810684	A	G	SNP	1	2833852	1	1201441	CATGCGCATCCTGCTGCTCATAGCTCGCCAAATTC[A/G]CGGCGTATTGCCACCAACTACAGTAAAACCAAACG
Y	AX-166502832	Affx-88810689	AX-89779629	Affx-88810689	T	C	SNP	1	2840970	1	1194330	CATGTAGGATGGCAAGTGTTGAGATCAGTAATCAC[C/T]GTCACAAATATCACTTTCTTCTGAAGCCCTTGCCA
N	AX-89779631	Affx-88810692	AX-89779631	Affx-88810692	A	G	SNP	1	2842646	1	1192654	CGTTGGAATGTTCGGAGAGGAAGATACGAATCTTT[A/G]ACAAGGTTTGTGACCTTGGAGCAGTGTTTGTGAAT
Y	AX-166502833	Affx-88810696	AX-89779632	Affx-88810696	A	G	SNP	1	2845908	1	1189391	TAGCAGAAGGCAAATGGGAAAATTTGCAGAGTTTA[A/G]GCTATCAATGTTTATTCTTGTCTTATGAACAAGTA
N	AX-89779635	Affx-88810700	AX-89779635	Affx-88810700	A	G	SNP	1	2852569	1	1182715	AAAGACAGATTAACTGATAATCCACATCTGAAGCC[A/G]AAAGAAATTGTCAGTAGCATTCTTCAGGATTTTGG
Y	AX-166520170	Affx-88810701	AX-89817646	Affx-88810701	T	C	SNP	1	2853271	1	1182013	ATTAAACAGGTTTCATCACAAGGTTATGACTGGGT[C/T]GTCCAGATTGAACAAGAATGTTGGACAAATGTATT
N	AX-89817646	Affx-88810701	AX-89817646	Affx-88810701	T	C	SNP	1	2853271	1	1182013	ATTAAACAGGTTTCATCACAAGGTTATGACTGGGT[C/T]GTCCAGATTGAACAAGAATGTTGGACAAATGTATT
N	AX-166502834	Affx-88810707	AX-89779636	Affx-88810707	A	G	SNP	1	2855267	1	1180017	CCGAGAGTATTGATGGGCATAGTAATGACGTGAAC[A/G]TTTAAAAAACGTTGATCGGCCAAGGCTCTGATGAT
N	AX-89779637	Affx-88810714	AX-89779637	Affx-88810714	A	G	SNP	1	2865201	1	1170085	GGGCTGAGAGGTGTGAGAAGTTCTTGAGCATTTTC[A/G]AGAGGGAAGGGTGTAAGATGGTGGAAATGAGCTGT
Y	AX-123357025	Affx-88810717	AX-89779638	Affx-88810717	T	C	SNP	1	2866222	1	1169064	AGGATTGGAAATGAAGAATCAAGGGTGTCAAGGTG[C/T]GATCAATTTCTTGATATTTTTGCTCAAGAAGGGTG
N	AX-123359749	Affx-88810721	AX-89811595	Affx-88810721	A	G	SNP-in-Insertion	1	2866648	1	1168641	AATCTGCATCTACATCTTCTTTGGAGGCTCTCAAC[A/G]TATATTCAGAACAACTAAAACCACCTTTGCACCTA
N	AX-166510757	Affx-88810722	AX-89817656	Affx-88810722	T	G	SNP	1	2868426	NA	NA	CACCAACATTAATGAGAAGCGCCTCAGGAACAATG[G/T]GAGCCCTAAACCATTGATCATCTTTCAGAAATTGA
N	AX-166520171	Affx-88810723	AX-89874775	Affx-88810723	T	G	SNP	1	2879865	NA	NA	AAATTGAAGACCTTCCACTTCTTTATCTTGCAACA[G/T]AAGGGTTATTAATGTTCCATCTGCATGTGGCTTGG
N	AX-166510759	Affx-88810733	AX-89817662	Affx-88810733	T	G	SNP	1	2893562	1	1142050	TTTCGTGATTTCACGGACTTGGTCAAGGAATTCAG[G/T]AGTCATTCCATGGTTAACTACCTGGAAAACACAAT
Y	AX-166520172	Affx-88810733	AX-89817662	Affx-88810733	T	G	SNP	1	2893562	1	1142050	TTTCGTGATTTCACGGACTTGGTCAAGGAATTCAG[G/T]AGTCATTCCATGGTTAACTACCTGGAAAACACAAT
N	AX-166520174	Affx-88810742	AX-89817666	Affx-88810742	A	G	SNP	1	2914704	1	1121290	AGAAAAGTGCTTGAGATTGGAGTATTAACTTGGTC[A/G]TTGGCTACAGCACTTGTCCCTTTCGTTGCTGGATT
N	AX-166510761	Affx-88810743	AX-89817667	Affx-88810743	T	C	SNP	1	2918143	1	1117849	CCCTTGGCATCAATATTTGTGAATACCATTGCATC[C/T]CAAATTGCTGATAACTTGATTTCTAATGGAGTTCA
Y	AX-166520175	Affx-88810743	AX-89817667	Affx-88810743	T	C	SNP	1	2918143	1	1117849	CCCTTGGCATCAATATTTGTGAATACCATTGCATC[C/T]CAAATTGCTGATAACTTGATTTCTAATGGAGTTCA
N	AX-89904228	Affx-88810746	AX-89904228	Affx-88810746	A	G	SNP-SNP	1	2924677	1	1111315	TTATTTAGGTTTTGTTTCGGCCGGATAAGATCCAT[A/G]TGATAAGGTTGGTCATGATCAGCATAATCTTCCAT
N	AX-89847041	Affx-88810755	AX-89847041	Affx-88810755	A	G	SNP-SNP	1	2955022	NA	1080654	TTTCTCAAAAGGTTCAGTGTTTAGACGTCGTACAC[A/G]TTACTCTTGTAGGCAACTATGAAAATTGAAGTGCG
N	AX-166520176	Affx-88810756	AX-89874790	Affx-88810756	A	G	SNP	1	2963933	1	1071769	CATGTGGCAGCCCAATACGGTCAGACTGCTTTCCT[A/G]TATCATATTGTTTCGAAATGGAATGCTGACCCTGA
N	AX-166509132	Affx-88810763	AX-89803213	Affx-88810763	G	GCAA	Indel	1	2969493	1	1066144	GAAGAGAGAGCAATCGGTGATTGAGGAAGAAGTAG[-/CAA]CTCGTAGACTAGTGTCCGGGAGGTATTGTAAAAGT
Y	AX-166502836	Affx-88810764	AX-89779647	Affx-88810764	A	G	SNP	1	2970396	1	1065244	ATGCGCACTTTCTCCAGCCTTTATAACTTAGAAAA[A/G]TTGGATTTGGAGAGGTGTCCAGAGATTCGTGGTGG
N	AX-89817677	Affx-88810765	AX-89817677	Affx-88810765	T	C	SNP	1	2970687	1	1064953	AATGTTAGATGTTGTAAATGCATCACAGATTCAGA[C/T]TTAAAGTCCATCTCAGGTACATTTTATTATAAGTC
N	AX-123357026	Affx-88810766	AX-89779648	Affx-88810766	A	C	SNP	1	2971722	NA	NA	ACAAATTTGAAGGTTCTGAGCCTGGGATTCAACAG[A/C]ATCACAGATGCGTGTTTGGTGCATCTAAAAGGTAT
Y	AX-123357027	Affx-88810767	AX-89779649	Affx-88810767	T	G	SNP	1	2973135	1	1062505	TTCACTGCTGCAGGTCTTACAAAATTGACGCATCT[G/T]GATCTCTTTGGTGCTCGGATATCAGACTCTGGAGC
N	AX-89779650	Affx-88810768	AX-89779650	Affx-88810768	T	G	SNP	1	2976088	1	1059547	GTTTGTGACTTATTTCGTGCACCTTCTTTCCAACG[G/T]GATCAAAGAGGGAGTAAGTTTGTTCGTGAAGCAAG
Y	AX-166517599	Affx-88810769	AX-89847042	Affx-88810769	A	G	SNP-SNP	1	2978042	1	1057593	TTCTCTAATGAGATTGGTGAGTGGAGAGAGTCACT[A/G]GTATCATGTCCACGCGGCTTTATTTTCTCCGAACT
N	AX-123360100	Affx-88810772	AX-89817679	Affx-88810772	T	C	SNP	1	2980393	1	1055242	CCCATCCAAACCCATTTTCTGCAACTGGATTTTAC[C/T]ACTAGTTGGACTGGAGAGTTCACTCAACCGTTGCT
N	AX-166510762	Affx-88810774	AX-89817680	Affx-88810774	T	C	SNP	1	2981509	1	1054126	TTCTTCAGTTATTTCTACAGCCTTCTTCTCCTCAA[C/T]CTTGTCTTCAGTATTCCCACTAGTATTGTCCTCAT
Y	AX-166520177	Affx-88810774	AX-89817680	Affx-88810774	T	C	SNP	1	2981509	1	1054126	TTCTTCAGTTATTTCTACAGCCTTCTTCTCCTCAA[C/T]CTTGTCTTCAGTATTCCCACTAGTATTGTCCTCAT
Y	AX-123366823	Affx-88810783	AX-89904231	Affx-88810783	T	C	SNP-SNP	1	2987355	1	1048238	CATCCGTAAGCCCCTATCTCTTCCCCCTTCTTTCC[C/T]TCTCACTCTTTCTATATAGTGAATCTAATAGCTAC
N	AX-166510763	Affx-88810787	AX-89817686	Affx-88810787	A	C	SNP	1	2989550	1	1046041	GAACTTCTCTTGTGCAGAGGTCAACACCTTCATTG[A/C]CTTATCAACCTGTCCACTGTGATATGCCACCACAC
N	AX-166520178	Affx-88810787	AX-89817686	Affx-88810787	A	C	SNP	1	2989550	1	1046041	GAACTTCTCTTGTGCAGAGGTCAACACCTTCATTG[A/C]CTTATCAACCTGTCCACTGTGATATGCCACCACAC
Y	AX-123357029	Affx-88810789	AX-89779656	Affx-88810789	A	C	SNP	1	2997985	1	1038336	TTAGTTGGCAAAAATCTTCTTGCTATTTCAGATAA[A/C]TGTTCAGAGTATGTATAAGCTGAATAAGTGAGTGC
N	AX-166502838	Affx-88810791	AX-89779657	Affx-88810791	A	G	SNP	1	3006310	1	1030007	ATGTATCCTGCTAGGAGACCTGAAAATAGAAATGC[A/G]CCTAGAGGATTCCCTAGCGACATGAAGTTGTAGAA
N	AX-166510764	Affx-88810792	AX-89817688	Affx-88810792	T	C	SNP	1	3006526	1	1029791	ATTAAAATTTGAGTGCAAGTCATCCAAAATGTCCG[C/T]GGAATTGTTTTCGTCCTGAAAAGAGAAGATATTCA
N	AX-166520179	Affx-88810792	AX-89817688	Affx-88810792	T	C	SNP	1	3006526	1	1029791	ATTAAAATTTGAGTGCAAGTCATCCAAAATGTCCG[C/T]GGAATTGTTTTCGTCCTGAAAAGAGAAGATATTCA
Y	AX-166520180	Affx-88810797	AX-89874801	Affx-88810797	A	G	SNP	1	3008290	1	1028027	GTCAACTGTCGCTGACTGAACCCCAGCACGGACTT[A/G]AGCGAGTGCGAATAAAGCGGGAAGTTATAGGCGTT
Y	AX-166510765	Affx-88810801	AX-89817690	Affx-88810801	T	C	SNP	1	3038663	1	997494	TGTCTTTCTTGTACTGTTGTAGAACTTTCCCTGAC[C/T]CGTGTACAGCACAATGCATCCAGCACTACAACAAA
N	AX-89874804	Affx-88810801	AX-89817690	Affx-88810801	T	C	SNP	1	3038663	1	997494	TGTCTTTCTTGTACTGTTGTAGAACTTTCCCTGAC[C/T]CGTGTACAGCACAATGCATCCAGCACTACAACAAA
Y	AX-166520181	Affx-88810803	AX-89817691	Affx-88810803	A	G	SNP	1	3046727	1	989426	AACTATTACCTCTCTGAAAGGCCTGATATACCAGG[A/G]AGTGGTTGGAGTATACCGCAGAAAAGTGGTTCCAA
N	AX-166520182	Affx-88810804	AX-89817692	Affx-88810804	T	C	SNP	1	3047406	1	988747	ACAGCATCGACTGAACCTGATGCAAATGGGAGCCT[C/T]GAAACATCTGCCCTTACAAGAGCAAGATTCCTGCA
N	AX-123365038	Affx-88810805	AX-89817693	Affx-88810805	T	C	SNP	1	3047892	1	988261	CACATACCTCTTCATCAGGACCTGGAAATCCACTA[C/T]TACTAAAATTCTGGCGCCAACCTCTCTCATACAAA
N	AX-166502839	Affx-88810807	AX-89779661	Affx-88810807	T	C	SNP	1	3050143	1	986010	CTGGAGAAGCATATTTTCAGAAAAATCAAGTGCCA[C/T]AACTCCAGAATATGTCCCAGATTTGGCGAATCTTA
N	AX-123357030	Affx-88810809	AX-89779662	Affx-88810809	A	G	SNP	1	3050514	1	985639	TTCATAGATGAATGACATGATAATACTCCTAAATA[A/G]CTCAGTCCCAATTGGTTTCGCTTCAACGTACTTCT
N	AX-123357031	Affx-88810810	AX-89779663	Affx-88810810	A	C	SNP	1	3053225	1	982929	GTAGATTACCCAGAAGATCAATGATAACATGACAG[A/C]AGCAGATACCATTACCAGCCCAATGTAGATCCAGC
N	AX-166502840	Affx-88810811	AX-89779664	Affx-88810811	T	C	SNP	1	3053587	1	982567	ACTGAATAAAGCATACTTCAATAACAGTACCTGTG[C/T]GGCATTCTGCAGCTCCACCTCACCAAGGGCACACT
N	AX-166510766	Affx-88810812	AX-89817694	Affx-88810812	T	C	SNP	1	3053739	1	982415	GTTGGGGTGGTGGATTGTTAAGATTTGAGATATTG[C/T]TGATGACCTTGTCTACCATGCTCGAAAGTTTGTAG
N	AX-123360103	Affx-88810821	AX-89817696	Affx-88810821	T	C	SNP	1	3066010	1	970142	CCGCCACTTGCTAAGATCTCCTTCTTTCAGGTTAC[C/T]CCCATAAGTATTTTCTAGAGAAATCAAGCAGGCTA
Y	AX-123524215	Affx-88810821	AX-89817696	Affx-88810821	T	C	SNP	1	3066010	1	970142	CCGCCACTTGCTAAGATCTCCTTCTTTCAGGTTAC[C/T]CCCATAAGTATTTTCTAGAGAAATCAAGCAGGCTA
Y	AX-166502841	Affx-88810822	AX-89779669	Affx-88810822	A	G	SNP	1	3066158	1	969994	CGTTTCCTTCGATTTGACATGTTACATGGTTCATC[A/G]GAACGTCTCTCGAATCAAAAAACAATGATGTATCT
N	AX-166502842	Affx-88810823	AX-89779670	Affx-88810823	A	G	SNP	1	3066238	1	969914	GATATAAAAACTATGCCATTCTCCCATTCATCACA[A/G]CGAGCACTACATAACATAAGTAGAAGATCTTGTCC
N	AX-166502843	Affx-88810825	AX-89779672	Affx-88810825	T	C	SNP	1	3066601	1	969551	CAAAAACAATCCTCCAAACAATTAGGAGCAAAGGC[C/T]GGTGCGGGTATCTCATACCATGAGCTTGTGCCTAG
Y	AX-166520183	Affx-88810832	AX-89817698	Affx-88810832	T	C	SNP	1	3073521	1	962635	GTGTACTCAGAAAAGATTGTGGACATGATGATCAC[C/T]GCTCATCATCAGGTACTACTAGCTTGAAGAAATTT
N	AX-123360104	Affx-88810833	AX-89817699	Affx-88810833	T	G	SNP	1	3074126	1	962030	GCAGGAAGCAGTAGAAAACTAATAACTGTGAGATC[G/T]TCTACCACCACTTCAAAGGTTGGTTATTGTTCATC
N	AX-166519458	Affx-88810835	AX-89867490	Affx-88810835	A	T	SNP-in-Insertion	1	3074523	1	961634	ATATATAGCCAGCTAGCTAGAATTAGTATTTAAGT[A/T]CTACGTACTGGACAGCATTACAGAAATGCTGCAGA
N	AX-166502845	Affx-88810839	AX-89779675	Affx-88810839	A	G	SNP	1	3080948	1	955183	GGTTTTAGCAACTGATCCTGCTTCAAGTACAAGCC[A/G]TGGTCGATCAAGTGTCTTCATTGAAAGTTTCAGTT
N	AX-166502846	Affx-88810843	AX-89779678	Affx-88810843	T	G	SNP	1	3083791	1	952339	GTAATGCCATTGATATCTCAAGCAGCAACTAGAGA[G/T]CCAGGTCATGTACCTGCAGAAGCGGAAAATTCTTC
N	AX-123360105	Affx-88810844	AX-89817701	Affx-88810844	T	C	SNP	1	3085338	1	950792	ATTTATTATTCAAGTTGAGAGAAGTTGTTGTCATT[C/T]ATGTTGCTAGTGAGTTTGATAATATCAGCTTTGAT
Y	AX-166510767	Affx-88810845	AX-89817702	Affx-88810845	A	G	SNP	1	3090302	1	945823	TTGCCAAGAGTTATTGTTGAGGATTCTGACTTTCC[A/G]GTAGAGCTTGAAAAGGTAATAACAAGGTCATTTGT
Y	AX-166510768	Affx-88810846	AX-89817703	Affx-88810846	A	C	SNP	1	3090809	1	945315	CTATAGAAATGTCAAAAGATCATAGACCCTGCTGC[A/C]CAAAAGAAAGGATGAGGATTGAGTCTTTGGGTGGA
N	AX-166520184	Affx-88810846	AX-89817703	Affx-88810846	A	C	SNP	1	3090809	1	945315	CTATAGAAATGTCAAAAGATCATAGACCCTGCTGC[A/C]CAAAAGAAAGGATGAGGATTGAGTCTTTGGGTGGA
Y	AX-166502847	Affx-88810853	AX-89779681	Affx-88810853	A	G	SNP	1	3103542	1	932595	TCATTTCTCATCCGGTAAGTGCTGGTTGTAATCAT[A/G]ATGAATCTAGTAGGGATAATAGTACTGCAGCTAGT
N	AX-166510769	Affx-88810855	AX-89817706	Affx-88810855	T	G	SNP	1	3104027	1	932110	GACACAAGTAACCGTGAGTCCAGAAGGAATGGTAG[G/T]CGTCTTTTTTGGGATGCATTTTCAAGACGCAGTTC
N	AX-166520185	Affx-88810855	AX-89817706	Affx-88810855	T	G	SNP	1	3104027	1	932110	GACACAAGTAACCGTGAGTCCAGAAGGAATGGTAG[G/T]CGTCTTTTTTGGGATGCATTTTCAAGACGCAGTTC
N	AX-123360106	Affx-88810856	AX-89817707	Affx-88810856	T	G	SNP	1	3104704	1	931433	CACCCCAGAGGCATGTGCTCATGTGGTTCATTCTT[G/T]ATGACGGAAGAGTCTAGTGCTCGGGCAAGTATATC
N	AX-166520186	Affx-88810858	AX-89874821	Affx-88810858	T	C	SNP	1	3105835	1	930302	TCTGCCTCGCTGAGTATGAGGAAGGGGACAAAATT[C/T]GAGTTCTGCCTTGCCACCATGAGTATCACATGTCA
N	AX-166518625	Affx-88810864	AX-89860585	Affx-88810864	A	AATT	Indel	1	3110839	1	925295	AAACCAAGTATTAGACACAGTAGTTAAATTGATTA[-/ATT]ACCAGAGAAAACGTTGAGGTTTGGTGAGTTTCATT
N	AX-166510770	Affx-88810865	AX-89817708	Affx-88810865	T	C	SNP	1	3118366	1	917671	AATGCTGTTGATCTTGTGAGCTCTCCTGCTACAGC[C/T]GGAGCTGGGCCTTATGTGTGTAGTTCGAATATGGG
N	AX-166502848	Affx-88810868	AX-89779686	Affx-88810868	A	C	SNP	1	3119573	1	916464	CATCTTCTCATGTTAATATGAGACCAAATGTACTT[A/C]AGCCATTGATGCAACCCCAACAGACTCGATTGGAT
N	AX-123357032	Affx-88810872	AX-89779689	Affx-88810872	T	C	SNP	1	3121021	1	915016	GGTGCAGAACTAAATACAGAAATGCAATTGGAGGA[C/T]GGAGGTCAGCCACTGGGTAATTTGAACAAGGATCT
Y	AX-166502849	Affx-88810873	AX-89779690	Affx-88810873	T	C	SNP	1	3121681	1	914356	TGGTAGATTATTAAGAATGATGACCTTGAAGAGCT[C/T]AGAGAATTAGGTTCTGGAACATTTGGTACAGTCTA
Y	AX-166510771	Affx-88810876	AX-89817710	Affx-88810876	A	G	SNP	1	3122579	1	913458	CACTTCCTTGGATGGCACCTGAACTTTTGAATGGT[A/G]GTAGTAGCCTTGTCTCTGAGAAGGTTTGTGTTAGT
N	AX-166510772	Affx-88810878	AX-89817711	Affx-88810878	T	C	SNP	1	3122939	1	913098	GGTATTGTGAGCAATACATTGCGGCCACCAATCCC[C/T]GAGTCTTGTGATCCAGAGTGGAAATCATTGATGGA
Y	AX-166520187	Affx-88810878	AX-89817711	Affx-88810878	T	C	SNP	1	3122939	1	913098	GGTATTGTGAGCAATACATTGCGGCCACCAATCCC[C/T]GAGTCTTGTGATCCAGAGTGGAAATCATTGATGGA
Y	AX-123366824	Affx-88810884	AX-89904233	Affx-88810884	A	G	SNP-SNP	1	3133880	1	902155	AACTTCGAACCCTCCTAAGTTCAACAAAAGAAACG[A/G]GACAATATTTCAACTTTGAACCAACTATATGTACT
Y	AX-166520189	Affx-88810897	AX-89874835	Affx-88810897	T	C	SNP	1	3158789	NA	883249	GCGTCTAGAAACACAAGCAATCCGGGGCCGGGCTC[C/T]TACGTCTGAAGAAGAAAACGATGGTCTACGCCACG
Y	AX-166520190	Affx-88810898	AX-89874836	Affx-88810898	T	G	SNP	1	3159381	NA	NA	AGGATGAATAAGTCATCAGGGATCGCCCACAAGCT[G/T]AAGAAGATAATCCCCATTTACTCCGAGCAAATAGA
Y	AX-166502851	Affx-88810900	AX-89779696	Affx-88810900	A	G	SNP	1	3160312	1	875706	TGAAAAAGATCTTGAAGATTCATGGAATTTCCAGC[A/G]TCTAGAAACACGCCTTCGAGAAGCAATCCGGGGTC
N	AX-123365040	Affx-88810903	AX-89817722	Affx-88810903	T	C	SNP	1	3183406	1	851246	TTTTGGTTTTTGAGTTGCAGGGAGGAATCCGAGTT[C/T]GGATAAAAAGAAATCCGGGTCGAAATCAGGAGGGA
Y	AX-123444819	Affx-88810906	AX-89817724	Affx-88810906	T	G	SNP	1	3186200	1	848453	TTGATTGGAGCTGGCATGGAGGATGATGATTTTTC[G/T]GTTGTTGAGCCTACTGGTGACAAAAAGAAGTCAGT
N	AX-89817724	Affx-88810906	AX-89817724	Affx-88810906	T	G	SNP	1	3186200	1	848453	TTGATTGGAGCTGGCATGGAGGATGATGATTTTTC[G/T]GTTGTTGAGCCTACTGGTGACAAAAAGAAGTCAGT
N	AX-89817725	Affx-88810907	AX-89817725	Affx-88810907	T	G	SNP	1	3186353	1	848300	CATGGCAGCAGCAAAGCCTTTGAACAAAAAAGTAG[G/T]AGGAAAGTGGATTCATTTGCTGATAAACCAGTATC
N	AX-89874841	Affx-88810907	AX-89817725	Affx-88810907	T	G	SNP	1	3186353	1	848300	CATGGCAGCAGCAAAGCCTTTGAACAAAAAAGTAG[G/T]AGGAAAGTGGATTCATTTGCTGATAAACCAGTATC
N	AX-166520191	Affx-88810909	AX-89874843	Affx-88810909	A	G	SNP	1	3189422	1	845230	TGCTGAGAATCTCGGTGAGCTCCTCATGGGGGATC[A/G]CATTGAGAATTCTCCGTATAAGTTTAAGATGCACA
N	AX-166510773	Affx-88810912	AX-89817728	Affx-88810912	T	C	SNP	1	3190890	1	843762	GCTGAGGTGTCTCTAGTTCTGACCTACATGCACCT[C/T]TGTGTGGAGGATTGGAAATGGTGGTGGAAGTCCTT
N	AX-166502852	Affx-88810913	AX-89779698	Affx-88810913	A	G	SNP	1	3193326	1	841326	ATGCAATCTTATCCACTTACTCAAACATAATGAAA[A/G]GGGTAACTTAGTTACTGTTATCATTTTCCCTTTTA
N	AX-123357035	Affx-88810914	AX-89779699	Affx-88810914	T	G	SNP	1	3193784	1	840868	TTGATTTGGGTATTTGTCAAATTTCAGGGAGTAGC[G/T]TAAGTCAGTCATCTTTGGTCCAGGTGCCTTTTCTG
N	AX-166520192	Affx-88810916	AX-89874846	Affx-88810916	T	C	SNP	1	3194337	1	840315	TTATGATGCACAGGATGTTTATCGAATAGGTACCT[C/T]AATGGAACTGGTTCGAACTCTAGCTCTTTCATTTG
N	AX-123357036	Affx-88810920	AX-89779701	Affx-88810920	T	C	SNP	1	3201398	1	833254	TCTTGAACATGAAACAGGTCATAGTGGCAATAATC[C/T]TGGGGGTGAAATTTGGTGAGAATCAAGAACTATCC
N	AX-166520193	Affx-88810923	AX-89874851	Affx-88810923	A	G	SNP	1	3209588	1	825057	GGCGGAGGAAACGGCGGAGGAGGAGGAGCCGGAGC[A/G]TCGACGTTTGAGTATTTCGGTTGGGTGTATCATTT
N	AX-89803226	Affx-88810925	AX-89803226	Affx-88810925	A	ATTG	Indel	1	3211748	1	822889	TAGATTTTATTCTTGGTAGAGTGGTAAAGGTGTTA[-/TTG]TCAAGGCTGTTGGTGTTATCGAAGCAAGTGCAGAT
N	AX-123365041	Affx-88810929	AX-89817736	Affx-88810929	T	C	SNP	1	3215896	1	818744	GTTCCCGCAAAGCCAAACTATAGTTTGGTACTTTA[C/T]TATGCTGCTGATAGACCTCCAAAGCCAGATTCGCT
N	AX-166520194	Affx-88810936	AX-89874857	Affx-88810936	A	G	SNP	1	3231118	1	802465	CTTCTCTGGGAATCTTCCACAGAATTTGGGGAGGA[A/G]CTCTAATCTTATGTGGGTTGATGTGTCTACAAACA
N	AX-166510774	Affx-88810938	AX-89817742	Affx-88810938	T	C	SNP	1	3231377	1	802206	CTTTCATATGTAGATTTGTCCAAGAATAAACTTAC[C/T]GGTGGGATTCCAATAGATATAGACCAAGCTCCCAA
N	AX-123360109	Affx-88810939	AX-89817743	Affx-88810939	T	C	SNP	1	3231557	1	802026	TTAGGCAATCTTCCTCCATTCGGAAGCTGTAAATC[C/T]ATATCTGTCATTGAATTGAACATGAACAGTATATC
Y	AX-166502853	Affx-88810940	AX-89779707	Affx-88810940	T	C	SNP	1	3232075	1	801508	GTGGAAGATGGTCTCATTTTCTGGACTTCCTCAAT[C/T]CACGGCAAAAGATGTATTGAAGAGCTTTAATTCCA
N	AX-166510775	Affx-88810941	AX-89817744	Affx-88810941	A	C	SNP	1	3232908	1	800675	CAGGAGGAGATAAAATGGGTGCTCGAGGTTGCTAC[A/C]CTCTGCACTAGGATCCGATCATCAGACCGACCATC
N	AX-166510776	Affx-88810942	AX-89817745	Affx-88810942	T	G	SNP	1	3235283	1	798300	CCAGATGCACTTCTGTCTCATATGCTCTCCTTCGT[G/T]GAAACCGAACAAGCTGTGAGGACTAGCATTCTCTC
Y	AX-166520195	Affx-88810942	AX-89817745	Affx-88810942	T	G	SNP	1	3235283	1	798300	CCAGATGCACTTCTGTCTCATATGCTCTCCTTCGT[G/T]GAAACCGAACAAGCTGTGAGGACTAGCATTCTCTC
N	AX-166510777	Affx-88810943	AX-89817746	Affx-88810943	A	G	SNP	1	3235402	1	798181	ACACTGCTGCTGTAAGGAACGAGGAAGCTCTAACC[A/G]TGCTGTGTTTGTGTCATTTGTTGATCGTGCGCTTC
Y	AX-123365042	Affx-88810947	AX-89817748	Affx-88810947	A	G	SNP	1	3240083	1	793497	TCATCAACCAACTTTCGCTCCGAAATGTGGTTCCC[A/G]ATGCCTACTCTTCTCTTGATATGAGATTCAGCTTG
N	AX-123360110	Affx-88810955	AX-89817753	Affx-88810955	A	G	SNP	1	3242956	1	790624	TAGATACTATAAATTCCCATGATTGTTAATCTTGT[A/G]CCAGGCACAATTGTCTGAACAAGATGGCGGTCCAC
N	AX-89874869	Affx-88810956	AX-89817754	Affx-88810956	A	G	SNP	1	3242985	1	790595	TCTTGTGCCAGGCACAATTGTCTGAACAAGATGGC[A/G]GTCCACAGATAGAAGCATATTTCTTGGAAGCTCTC
Y	AX-166502854	Affx-88810957	AX-89779710	Affx-88810957	A	G	SNP	1	3243432	1	790148	ACCCTTTGCACATTTTTACAGTTCTTACACATCAC[A/G]ATAACATAAGTCGCCTTCGCTTTGACCCTCGATGC
N	AX-166520196	Affx-88810958	AX-89874870	Affx-88810958	A	G	SNP	1	3243751	1	789829	AGAAAAGACTAACCCCAAGCTTGCGCATGGAAGTT[A/G]TATCTTCTCTGGAGGTCAACAAAATCTGAACATCC
N	AX-166510778	Affx-88810959	AX-89817755	Affx-88810959	T	C	SNP	1	3243782	1	789798	AGTTGTATCTTCTCTGGAGGTCAACAAAATCTGAA[C/T]ATCCTCCGGCACCGGCTCTTCCAATTGGCCTTCAC
N	AX-123365043	Affx-88810962	AX-89874871	Affx-88810962	T	C	SNP	1	3247794	1	785806	GGAAGCAGTAGCAGAAACATTATTCCCCTTCACTG[C/T]TGCCTCAATTGAAAATGTTTTACCCTTCTTTGATG
N	AX-166502855	Affx-88810963	AX-89779712	Affx-88810963	A	G	SNP	1	3247900	1	785700	AGTTCCCGTAGTTCCCTAACAGGACTAAGCTGAAC[A/G]TTGGAGAAGCTCATGACTGGTTTCAGAAACGATAG
N	AX-123589300	Affx-88810964	AX-89874872	Affx-88810964	T	C	SNP	1	3248282	1	785318	AGTTCACATAAGTCTTTATAGCCTTAGAAAGGGTA[C/T]AGGAGTCAGAGACTAGAAACTTGTGGAAGGATCGA
Y	AX-166510779	Affx-88810965	AX-89817756	Affx-88810965	T	C	SNP	1	3248378	1	785222	TATTATTCACAGAAATTGATCTCAAGTCTGTCATA[C/T]GGCCAGGCTTTAACTTTGGATAAACTGAATACAGG
N	AX-166502856	Affx-88810966	AX-89779713	Affx-88810966	T	C	SNP	1	3248935	1	784665	TACTGCACTGCATAAATCTTGAGAATCAATAGATC[C/T]TATTGTCTCCTGGTCACAAATATTTTTGCAAGGAC
N	AX-89874874	Affx-88810968	AX-89817757	Affx-88810968	T	C	SNP	1	3249957	1	783643	TCAGGAGAGCAGTCTTACTCTCTGGGCAGTAACCT[C/T]GGCTCCTTCAGGGAATGAAGTACATAATACATGCT
N	AX-166502857	Affx-88810971	AX-89779715	Affx-88810971	T	C	SNP	1	3252189	1	781411	GGAGCATTTGAAGGTAAAATTATATGGCAAATAGT[C/T]CCCTCCAAATCACCAAGAAAATAGAATTCTGGACT
Y	AX-166510780	Affx-88810973	AX-89817759	Affx-88810973	T	C	SNP	1	3252712	1	780888	TTTACCAAAAATACATATTCAGACTGAGGCATCCG[C/T]GCACGACCTCGTGACTGTATAAAGCTAGCAACAGT
N	AX-166520197	Affx-88810973	AX-89817759	Affx-88810973	T	C	SNP	1	3252712	1	780888	TTTACCAAAAATACATATTCAGACTGAGGCATCCG[C/T]GCACGACCTCGTGACTGTATAAAGCTAGCAACAGT
N	AX-166510781	Affx-88810979	AX-89817762	Affx-88810979	A	C	SNP	1	3257171	1	776752	CGGTGGTACAAGTTACGCAGCAGTATTTGAGGAGT[A/C]ATAACAAGAACCTGCATAAAATATCAGCAAAAGAT
Y	AX-166520198	Affx-88810979	AX-89817762	Affx-88810979	A	C	SNP	1	3257171	1	776752	CGGTGGTACAAGTTACGCAGCAGTATTTGAGGAGT[A/C]ATAACAAGAACCTGCATAAAATATCAGCAAAAGAT
N	AX-166520199	Affx-88810981	AX-89817763	Affx-88810981	T	C	SNP	1	3258362	1	775561	TTCTGAGGTTTGAGTATCAAGTGGCGCAGCTCATA[C/T]ATGAGCAGCACCGCTATGTGAGTTTTTCCACAGCC
N	AX-166520200	Affx-88810984	AX-89817764	Affx-88810984	A	G	SNP	1	3264680	1	769244	CCAACATTATAAGGGTGAGCAGCAAATCTACACGG[A/G]ATTGCAGACACATATGGGCTGTTTAAAGTGAAGAT
Y	AX-166520201	Affx-88810985	AX-89874884	Affx-88810985	T	G	SNP	1	3265691	1	768233	ATCACCTTGTCGTCACTAGCGACCTTCCAGAAGGC[G/T]AGAAGTAGGCAGAATGCACAGCCCTTTTGTGACCA
Y	AX-123357040	Affx-88810990	AX-89779722	Affx-88810990	T	G	SNP	1	3291056	1	741175	TCGGGCAGAGGAGATGGCTTCACTCTATCCTTAGA[G/T]ATGGTCATGATGGTGCCGTCATTCAAGATTGCAAT
Y	AX-123365044	Affx-88810992	AX-89817767	Affx-88810992	A	G	SNP	1	3291791	1	740440	AGAGGCAATAGACCAACAAACTCCCATGGATCACC[A/G]GCACTTTCCTTGGTCTTCTCTGATACTGTCTGTAG
Y	AX-166510782	Affx-88810994	AX-89817769	Affx-88810994	A	G	SNP	1	3293169	1	739062	GATTCACCAGTGAGTGCAGCCTGGTCAATCTTTAA[A/G]GGATCACCTTCCAGGAGACGAGCATCAGCTGGGAC
Y	AX-166527203	Affx-88810998	AX-89904235	Affx-88810998	A	G	SNP-SNP	1	3304506	1	727723	TACATGAAATTGATGCAGATTCAATATGAAAAAGG[A/G]AATATATGCATTGGCAAAATGCTGACTGTCTTATG
N	AX-89779723	Affx-88810999	AX-89779723	Affx-88810999	T	G	SNP	1	3304752	1	727477	AAAATGAAAGCGGAAAAGCAAGGATACTTTTCCAG[G/T]GTAAGGCAATGCTGTGTAATTTAAGCGGTCATCTT
N	AX-89812394	Affx-88811006	AX-89812394	Affx-88811006	A	G	Codon-based	1	3312088	1	720141	TGTTGGACTGTTTGAGTGAAAGTTGAGAACTGATC[A/G]GGCGAGTTTGCGGAAATGGCGACTTGGTAAGTGTT
Y	AX-166520202	Affx-88811017	AX-89817777	Affx-88811017	T	G	SNP	1	3354673	5	25427738	ACAAGTACACCATCATACTCCTTATCAATTTTCCG[G/T]TCTTCCCTACTATGCCATTTCCTCTTCACCTTTCT
Y	AX-123360112	Affx-88811020	AX-89817778	Affx-88811020	T	C	SNP	1	3365002	5	25417032	CTTCTCATGTTGTGCAAAGGACTTCCTCTTGCTTA[C/T]AATCGTGATTTGCAGGTATATTGATCTCTATCATC
Y	AX-123363505	Affx-88811025	AX-89847049	Affx-88811025	T	C	SNP-SNP	1	3367021	5	25415008	GTTTGAAAAGCTGTGCTCAGTAGAGGCAGAGAACC[C/T]GACATGCATCAGCTAACTCCTAATTGCTTGGACAG
N	AX-166518626	Affx-88811029	AX-89803230	Affx-88811029	T	TTTGGA	Indel	1	3368742	5	25413281	ATTGAACATGATGTCAACTTCTAATATCTCAAGTT[-/TTGGA]AATGCATGGAATGCTTGATCAACTAGTCCACCTCC
N	AX-89817781	Affx-88811035	AX-89817781	Affx-88811035	T	G	SNP	1	3379802	5	25402221	TCATTGAGATGGTCTTGTCTGACCAAGGAGAGGGT[G/T]GAGGAAATGTTTCTGTGATTCCCATAGTGGGAATG
Y	AX-123357041	Affx-88811036	AX-89779729	Affx-88811036	A	G	SNP	1	3381250	5	25400773	GACTTTGATGGTCGTGTAATCAGTTCCATGCCAAT[A/G]GATGTTGGGAAGCTGACCAGTCTTGAAACTCTGCC
Y	AX-166520204	Affx-88811048	AX-89874909	Affx-88811048	T	C	SNP	1	3458517	NA	25310312	GCTATCACCATATGCCTTCTTTAGTATAGGTATTG[C/T]TCTCTGAACTTCAAATGTACATGAAACACCACCTG
Y	AX-166502860	Affx-88811061	AX-89779740	Affx-88811061	T	C	SNP	1	3535582	5	25229840	TCTTTGGTATGAGAAATTTGAAATGGTGAAGGTAT[C/T]GAAGACAGTGATCCATTGATCGAGGAATCTGGGCC
Y	AX-89817794	Affx-88811063	AX-89817794	Affx-88811063	T	G	SNP	1	3536102	5	25229320	AAACCTCACGAGCTGCCTGTCTTCAATTTTAACAA[G/T]ACAAGAAGACCGATGATCTGACACACAATACTTGC
Y	AX-166502861	Affx-88811065	AX-89779742	Affx-88811065	T	C	SNP	1	3536999	5	25228423	GCACAATACACTTTTGGAATTCTCTCAATCTCTTG[C/T]TAACCACTTTCCAGCGCATGTGTAGATCTCCTTGC
N	AX-166502862	Affx-88811066	AX-89779743	Affx-88811066	A	C	SNP	1	3537196	5	25228226	AAGTTTCTCCACCAACACTAAGGTATTCTCTGAAG[A/C]ACGATACAGTTCATGTGCCTTATCTTGAAGTTCCT
N	AX-89862676	Affx-88811070	AX-89862676	Affx-88811070	T	TTTA	Indel	1	3563061	NA	NA	TGAGATATCAATTACCTTGATCCTTGATTCTTATT[-/TTA]TTTGTTCAATTATATGTTTTCTATGATTAATTATA
N	AX-166509133	Affx-88811074	AX-89803233	Affx-88811074	T	TGTG	Indel	1	3572780	5	25192522	TTCTCATATTATATTGAGATTAAAGTACTTGATAT[-/GTG]GTTAATTGTTCCCTATGGCTGTTTATTATTCCATA
Y	AX-166520206	Affx-88811075	AX-89817796	Affx-88811075	A	G	SNP	1	3572915	5	25192390	GCCATGGTTAATCCAGTAAATAGCAGTACAGTCCG[A/G]TCAGCAGACTTCTGTGGCCATTCCACAATCTTAAA
Y	AX-166510784	Affx-88811077	AX-89817797	Affx-88811077	T	G	SNP	1	3574179	5	25191125	TTGTATATGTGGTGTCAATAATAAGTACTTTTATT[G/T]ATTTGAATTCAAACGTAAATGAGAAACGTCAGATG
N	AX-89874916	Affx-88811077	AX-89817797	Affx-88811077	T	G	SNP	1	3574179	5	25191125	TTGTATATGTGGTGTCAATAATAAGTACTTTTATT[G/T]ATTTGAATTCAAACGTAAATGAGAAACGTCAGATG
N	AX-166510785	Affx-88811079	AX-89817799	Affx-88811079	A	G	SNP	1	3577189	5	25188219	AATTTCTATGTGAGATTGGAAGGGTTCAGAAATTC[A/G]CAAATAGCTTTTGTTCCCCTGCTTTCATGTTTCAC
Y	AX-166520207	Affx-88811080	AX-89874919	Affx-88811080	A	G	SNP	1	3577298	5	25188110	AGATTCACAAATGCCGGCTGTTGACTTTGGAACTG[A/G]CTATACTGTGGATAGCCACATTGCAGAGGTTTCTG
Y	AX-166520208	Affx-88811084	AX-89817802	Affx-88811084	T	C	SNP	1	3580049	5	25185357	GGAATTTGGTTTTGCATAGCTCTGAATGTATTGGT[C/T]GGTTGTTTGATTTATTCTGGGAAGAAGGTCTGAGA
Y	AX-166502863	Affx-88811091	AX-89779747	Affx-88811091	T	C	SNP	1	3585362	5	25180089	GAAACACTTTCAGCTCTAAAACATCTCTTTCATGT[C/T]GTTGCAAACAGTGGTATAAATTACTTATTGTGCCT
Y	AX-166510786	Affx-88811094	AX-89817806	Affx-88811094	T	C	SNP	1	3589006	5	25176443	TATTCTCTAATTACCATGTACTATGAATAGGAATT[C/T]GGGTGGAATGGCTGGTTAACAGCTTGTGTGAAGTT
N	AX-89817809	Affx-88811097	AX-89817809	Affx-88811097	T	C	SNP	1	3591910	5	25173539	AGCAGTGCATTAGGTGGCAAACCAAACAAAAATGT[C/T]GATAAGGCAATGCTCTTACGAGGAGAGAGGTGCCC
Y	AX-166502864	Affx-88811103	AX-89779749	Affx-88811103	T	C	SNP	1	3594817	5	25170553	TATAGCTGTGATTCTGTTTCAGGTTCTTACATCAG[C/T]TCCTTGTGTACTTGTGTCCTCCAAAAGAAAATTAG
N	AX-166510787	Affx-88811104	AX-89817813	Affx-88811104	A	G	SNP	1	3595659	5	25169711	TCAACCTTTCGGGATCTTTCAAAACCAGTTGGAGC[A/G]CTTGATTTGAAACGATTTGAGGTTGGTTTATAGAT
N	AX-166520209	Affx-88811104	AX-89817813	Affx-88811104	A	G	SNP	1	3595659	5	25169711	TCAACCTTTCGGGATCTTTCAAAACCAGTTGGAGC[A/G]CTTGATTTGAAACGATTTGAGGTTGGTTTATAGAT
Y	AX-89874936	Affx-88811107	AX-89874936	Affx-88811107	T	C	SNP	1	3597384	5	25167986	TGTATATGTCGTTGATCCAATACTTGGACAGGTGA[C/T]GTCTTTCTTGATGGATAGTAGTTCAATTCCTGTGG
Y	AX-123365045	Affx-88811112	AX-89817817	Affx-88811112	A	G	SNP	1	3601546	5	25163823	GTCATTGTTGAAACCCCTTTTCGTATTCTATGTGG[A/G]CACGATGATATAATTACATGCTTATTTATCAGCGC
Y	AX-166510788	Affx-88811122	AX-89817821	Affx-88811122	T	C	SNP	1	3634680	5	25130217	CAAAGCGTTCAAATCTTTCGCGAAGAATAGCTTCC[C/T]TGGTTAGATTCCGTGAGAAACGGAAGGAGAGATGT
N	AX-166520210	Affx-88811122	AX-89817821	Affx-88811122	T	C	SNP	1	3634680	5	25130217	CAAAGCGTTCAAATCTTTCGCGAAGAATAGCTTCC[C/T]TGGTTAGATTCCGTGAGAAACGGAAGGAGAGATGT
Y	AX-89874942	Affx-88811127	AX-89874942	Affx-88811127	T	C	SNP	1	3639260	5	25125488	GCTTGTGAGAGAGCGAAGAGGACTCTCTCATCCAC[C/T]GCTCAGACTACCATTGAGATTGACTCTCTGTTTGA
Y	AX-166520211	Affx-88811132	AX-89874944	Affx-88811132	T	G	SNP	1	3639782	5	25124966	ATCCAGGTCTTTGAGGGTGAGAGGGCAAGAACCCG[G/T]GACAACAATCTGCTTGGCAAGTTTGAGCTTTCCGG
Y	AX-89817825	Affx-88811133	AX-89817825	Affx-88811133	T	C	SNP	1	3639899	5	25124849	GACATTGATGCCAATGGCATTCTCAATGTATCTGC[C/T]GAGGACAAGACTACAGGCCAGAAGAACAAGATTAC
N	AX-89779756	Affx-88811136	AX-89779756	Affx-88811136	A	C	SNP	1	3641239	5	25123509	AAAGAGGTGAAATGGTGCATGGTTACATGGTAAAA[A/C]CACGGTTTGATAGTAATGTTGATGTTGTTACTGGT
N	AX-123360114	Affx-88811143	AX-89817829	Affx-88811143	T	G	SNP	1	3650075	5	25114668	TTGCGGTGTGTGTAGAAATAGAGAGCCTCTACATC[G/T]TCAGATTTATTACCACCGTACTGGTCCCAAATAAC
N	AX-89874949	Affx-88811143	AX-89817829	Affx-88811143	T	G	SNP	1	3650075	5	25114668	TTGCGGTGTGTGTAGAAATAGAGAGCCTCTACATC[G/T]TCAGATTTATTACCACCGTACTGGTCCCAAATAAC
N	AX-89817830	Affx-88811147	AX-89817830	Affx-88811147	A	G	SNP	1	3664636	5	25100339	ACCCTTGCCGTATATTGGATTGCAAACAAAGGAAC[A/G]AGTACCATCAAACTGCTATAAGCACTGCGCACCAT
Y	AX-166509627	Affx-88811148	AX-89806452	Affx-88811148	C	CAATT	Indel	1	3667921	NA	NA	TGCAACATTCTTGTCAAAACATGGTTGTTGGCATC[-/AATT]AATGTCAGCACCAATTGCTAAAAGCTTCTCTCACT
N	AX-166520212	Affx-88811154	AX-89874954	Affx-88811154	T	C	SNP	1	3687606	5	25075432	TCAGTAGCAACTGATTCTGCAACAGTCTCTTCCCA[C/T]GATCTGTCAAAGGAGGATGTTCTTCTTAACTCAGG
N	AX-166502865	Affx-88811159	AX-89779763	Affx-88811159	T	C	SNP	1	3695236	5	25067800	CCACATTGTATCCATCATCGTCACTTGGATCAGAT[C/T]GGGTATGCTCGTCGCTCTCACTTCCATTTTCAAAC
Y	AX-89874956	Affx-88811160	AX-89817833	Affx-88811160	A	G	SNP	1	3695274	5	25067762	GTATGCTCGTCGCTCTCACTTCCATTTTCAAACTC[A/G]GACCTCACATAAGTCATCTCAAGATTTTTTCTCCC
Y	AX-123524219	Affx-88811165	AX-89817837	Affx-88811165	A	G	SNP	1	3697435	5	25065595	CCCATAAAGTTTAGAAAATGGTATATTATTTTCAC[A/G]ACAGACAGGATCCAGCATCTTTATAACATCTATGA
Y	AX-166510789	Affx-88811166	AX-89817838	Affx-88811166	T	G	SNP	1	3697556	5	25065474	GCTGATATGGCAAGAAGAGAAGTTCTTGATGTACT[G/T]GGCTTAAAACCAGCCTGAAACCCTTCCCTACAGGC
Y	AX-166510790	Affx-88811169	AX-89817841	Affx-88811169	T	C	SNP	1	3702204	5	25060823	TTGCTTTTTCTGTGCTTTCTTAGAAGCAATAGAAT[C/T]GATTGTGGACTCTATAGCTTTATCAGGGTCAGATG
N	AX-166520213	Affx-88811171	AX-89817843	Affx-88811171	T	C	SNP	1	3703440	5	25059587	TTTGCCTTTGGCGTACTCTTATTTGAAGACCTCAT[C/T]ACAACTTCTAAGTCAGATATTAACACTTGCAACTT
N	AX-89817844	Affx-88811172	AX-89817844	Affx-88811172	A	C	SNP	1	3703479	5	25059548	ACTTCTAAGTCAGATATTAACACTTGCAACTTGGG[A/C]TCTTTAGAAATAAAACCAACCCCTAATTTGACCAA
N	AX-166527612	Affx-88811173	AX-89904244	Affx-88811173	A	C	SNP-SNP	1	3705770	5	25057256	CGACTCTTTAGAGAAGGACATTTTAGTCTTTTCCC[A/C]CAACAGAACCCAAGCTCCTAAAACCCTTCTTCTGC
N	AX-166502866	Affx-88811175	AX-89779765	Affx-88811175	A	G	SNP	1	3706388	5	25056638	GATTAGATGTAGTTGATTTCAAAGTCAAGGCTTTA[A/G]TTGCCAAGGTAGGTTATCCATGTTTGTTCTTACGG
N	AX-166520214	Affx-88811177	AX-89817846	Affx-88811177	A	G	SNP	1	3707044	5	25055982	CGTTTGTATTCATATATTGTAGGATCATGGCAAGT[A/G]TATACCACCCAAAATTGCACCAACTTCAATGGAGA
Y	AX-166502867	Affx-88811178	AX-89779767	Affx-88811178	T	C	SNP	1	3708585	5	25054441	CGTCCTTGGTTTGCATAATTGTGTAGACAATTGAC[C/T]GTCTTGGCTCATATTGCAGATGAGGCGTTGAAGGA
Y	AX-166520215	Affx-88811186	AX-89817850	Affx-88811186	T	C	SNP	1	3718261	5	25044753	CTCGACTCCAGATAGCATCTGACCAGTATCATTCC[C/T]GCTGAAATAAATAAAACACAACAAATATCAGGAGC
Y	AX-123363507	Affx-88811191	AX-89847054	Affx-88811191	A	G	SNP-SNP	1	3739339	NA	NA	CCATTGCATGAAGTCATTAGACTCTATAAGGAGCA[A/G]AACACTTGATCAAACATGAGAAGTAAATGACAGTC
N	AX-89874976	Affx-88811196	AX-89817854	Affx-88811196	T	G	SNP	1	3766222	5	24996423	TTTCTATCGAAAGGATCGCGCCCTCTCGAATTTGC[G/T]TCTACTACTCTTTCCACTGCCTTAGGTGTTGCCTG
Y	AX-123357044	Affx-88811210	AX-89779781	Affx-88811210	A	G	SNP	1	3784280	5	24978338	GTAATAAGGTTCGAAGGAGTGAATGGAAGTCCAAT[A/G]GTTAGTGGAATTTGTATAAAGCGGCCAAGATTATC
Y	AX-166502868	Affx-88811213	AX-89779783	Affx-88811213	A	G	SNP	1	3784615	5	24978003	GTATATAAGGATGCAGTTCATTGCCAAGTATGAAA[A/G]GAAGATAGAAGAGCTTAAGACCTGGTTTCAGCTGA
Y	AX-89779784	Affx-88811215	AX-89779784	Affx-88811215	A	C	SNP	1	3785157	5	24977461	TTTGCAGTTGATGAAGCAAGAATATTATCAGCTGT[A/C]CTGTGAAGTGCACAAGTGTGCTGATGCAGTTCCAG
Y	AX-123357046	Affx-88811219	AX-89779788	Affx-88811219	A	C	SNP	1	3786968	5	24975650	TGATGTTTGTCCAAATTAGCCCTTCAGAGCAGGAC[A/C]TGAATGAGACTTTAAGTTCTCTAAACTTTGCAGCA
Y	AX-166520216	Affx-88811224	AX-89817860	Affx-88811224	T	C	SNP	1	3790243	5	24972374	CTCTCTTCAAGATGTTGCTTAGAAGGATACTCTGG[C/T]AAATCCAACTGATTGAAACTGCATTAAACAACAAA
Y	AX-166502869	Affx-88811226	AX-89779791	Affx-88811226	T	C	SNP	1	3792091	5	24970336	TGAGAACTTCATAAAAGCAACATGTTTCTCATCCA[C/T]TTTGACAGTGGGAGTCGAGGATTTCTGCAGGCTAG
N	AX-123360118	Affx-88811228	AX-89817862	Affx-88811228	T	G	SNP	1	3794282	5	24968145	AGCATGAGCACACAAATTCAACAGAAGCTTCTGCA[G/T]CTGACCTTTATACAGAGGCTGCAACATAACATCCA
Y	AX-166527476	Affx-88811229	AX-89904246	Affx-88811229	T	C	SNP-SNP	1	3794307	5	24968120	AGCTTCTGCAGCTGACCTTTATACAGAGGCTGCAA[C/T]ATAGCATCCATCATGTTTCACATAATAAGGGAATT
Y	AX-89817864	Affx-88811231	AX-89817864	Affx-88811231	T	C	SNP	1	3794851	5	24967576	AACTGGTTGACCTTCCAGTTCCTGGGACTGATGTA[C/T]CCTTTGGGCTTGCTGTTGAGCTAAAACTTCAGCCC
N	AX-166502870	Affx-88811232	AX-89779792	Affx-88811232	T	C	SNP	1	3794935	5	24967492	AAGGGCAGCAAGAAATTCTGGATCAATATCACCAG[C/T]ATTTTGTGGCTCAGAGGCTGACTGCGGAGCAACTT
Y	AX-123360119	Affx-88811234	AX-89817865	Affx-88811234	T	C	SNP	1	3795817	5	24966610	CAGTGATCGGAAAATACTGTCCAATCTTGATGAGG[C/T]GATCTCTGTGTTCCTATCTGGTATGACCCCATCAC
Y	AX-123357047	Affx-88811246	AX-89779797	Affx-88811246	T	G	SNP	1	3798298	5	24964129	TTGCTTGTCCTCATCAATGGTAATAGATGTTTGCT[G/T]GCTACTAACAGCATCTCTCTTCAACTGCTCGGCAA
Y	AX-166520218	Affx-88811247	AX-89817869	Affx-88811247	A	G	SNP	1	3798959	5	24963468	ACCTGTCTCAAAGCTTCTTCAGCTCTAGATCTGGA[A/G]AAGCCCATATCTACAATAGTTGATATAGTCGTCTC
N	AX-123365047	Affx-88811251	AX-89817871	Affx-88811251	A	G	SNP	1	3801254	5	24961173	TGAGATCTGGTAGAATTGCCAGCAGCATATGAAGC[A/G]GACCCAAGTGCCTTCAACGAAGCTTTAATGAGCCT
N	AX-89817871	Affx-88811251	AX-89817871	Affx-88811251	A	G	SNP	1	3801254	5	24961173	TGAGATCTGGTAGAATTGCCAGCAGCATATGAAGC[A/G]GACCCAAGTGCCTTCAACGAAGCTTTAATGAGCCT
N	AX-123357048	Affx-88811252	AX-89779800	Affx-88811252	T	C	SNP	1	3801509	5	24960918	AGAGTTTTCACAGCAAAACAGACTAGATGCAAGTG[C/T]GAGGGATCAGAATCCTCCAAAAGAGGCAAAAATGT
N	AX-166502871	Affx-88811261	AX-89779803	Affx-88811261	T	G	SNP	1	3815357	5	24946138	AACATGTTCATCAACAACATTATTGATAAAAGAAT[G/T]TGCCAAGTCAGAACTCAACTGCAATGCCAAAATGC
N	AX-89865117	Affx-88811268	AX-89865117	Affx-88811268	T	C	F.innumae-derived	1	3840846	5	24920462	GAGAGATCAGGCATGTTTCACTGAGAAACTCATTT[C/T]GTATAACCTCTGGAGAGTATCCTCGCAAGCAGAGC
N	AX-89779806	Affx-88811271	AX-89779806	Affx-88811271	A	G	SNP	1	3848097	5	24913206	TTGGTAACTTTGAGAGGCCGTTTCAGAAACTTGAA[A/G]CTAGGTTTAAAGGTACGGATAAAGTATCCAGGTGG
N	AX-123360120	Affx-88811272	AX-89817878	Affx-88811272	T	C	SNP	1	3850383	5	24910918	AAGTTGAAGATTCTCAACCTCAGTCATTCACATCA[C/T]CTAACACTATCACCAGACTTTTCAAAACTCCCACA
N	AX-89779807	Affx-88811276	AX-89779807	Affx-88811276	T	C	SNP	1	3850713	5	24910588	CCATCCTATATGGGAAGATTGAAGAATCTGAACTA[C/T]CTATCACAACAAGGCCTGATTCGCCAGATACTACA
N	AX-123360123	Affx-88811279	AX-89817883	Affx-88811279	A	G	SNP	1	3850899	5	24910402	TCCAATCTTGAATATCTACGTTTCAATAATTGCAC[A/G]AACCTTCCTGCAAGCAGAAACTTACCAACTAGTTT
N	AX-89817889	Affx-88811292	AX-89817889	Affx-88811292	A	G	SNP	1	3875733	5	24883918	TTGTATGATCGGAAGAGAGAATCCACGCCAGCAGA[A/G]CCACCTTAACTGTTTGGAAACATAGCCATAGTCTC
Y	AX-89817897	Affx-88811304	AX-89817897	Affx-88811304	A	C	SNP	1	3918936	5	24839846	GGATCAGGAACATAAAATTCAGCTGCAGAACGATC[A/C]GGGATGCCAATTTCCCACAATGTTGGTCCACTTCT
Y	AX-166518992	Affx-88811306	AX-89862681	Affx-88811306	C	CATA	Indel	1	3920485	5	24838296	ATGAAAACCTATCAGTTTCTCCTGTTTGATTGTCC[-/ATA]ATAAACTTATCACATACACCTGATCAGTTTGCAAA
Y	AX-166509628	Affx-88811307	AX-89806457	Affx-88811307	A	ATAAT	Indel	1	3921012	5	24837769	GAGTATGTAAGTGTCACTTAAGTACCTACCAGGCA[-/TAAT]TAAGATTCAGTTTGTAGATCTTCAAACAGGCTTTA
Y	AX-166520219	Affx-88811308	AX-89817898	Affx-88811308	A	G	SNP	1	3921339	5	24837442	ATAGATTACCTATCTTGAACCTGTATTCTGCCACT[A/G]AGATTACCCCGTTCATGTGATGGTGGAAAGTCGGT
N	AX-166502873	Affx-88811311	AX-89779814	Affx-88811311	A	G	SNP	1	3923375	5	24835406	GTACCCTCTATCAGATTCTTTATTCTGAATTTCAA[A/G]CAGATTGTCGATGCCATTATATTGTATTCCAGTTA
N	AX-166502874	Affx-88811315	AX-89779815	Affx-88811315	T	C	SNP	1	3930433	5	24828338	TCAGAGGAAGCTGGAAATTCATAAGGCCAGCTTTG[C/T]ACTTCTGTCATCATCTGAAAATAATTAATGTCGGA
N	AX-166510793	Affx-88811318	AX-89817903	Affx-88811318	A	G	SNP	1	3931111	5	24827660	GAGGTGAGGTTTTGTTTAAGAGGTCCGCCGGATCG[A/G]AACTCATCACTAGGTGTTATCTGCCAAAACCCTAC
Y	AX-89875025	Affx-88811318	AX-89817903	Affx-88811318	A	G	SNP	1	3931111	5	24827660	GAGGTGAGGTTTTGTTTAAGAGGTCCGCCGGATCG[A/G]AACTCATCACTAGGTGTTATCTGCCAAAACCCTAC
N	AX-89817904	Affx-88811319	AX-89817904	Affx-88811319	T	C	SNP	1	3931454	5	24827317	TGTGGCTCTATAGGATTGACAAGAAGGACTGCTTC[C/T]GGGAAATCTGAATTTAAGATTTGGCTTCGTTCTGG
N	AX-166502875	Affx-88811321	AX-89779817	Affx-88811321	A	G	SNP	1	3932347	5	24826424	ATCCCAGTGACAATTCCACCTGGATTTGATAGTGT[A/G]ACTTGGACAATGCCGTTATCCATAATCACCTGCGT
Y	AX-166510794	Affx-88811324	AX-89817905	Affx-88811324	A	G	SNP	1	3936098	5	24822673	CTAGCAAGAAAAACAAACCTGTCAGTGTGATTGAC[A/G]TAGAGTTTGTTAATGTACTTTGGATTAGGATCTGG
N	AX-89875028	Affx-88811328	AX-89817907	Affx-88811328	A	C	SNP	1	3937525	5	24821246	TCCAGTTTTAAACTCTTCACTGGGAGTGATCTGCC[A/C]AAATCCAACCTGCGAGTCATTTGCTATCCATCCAT
Y	AX-166517600	Affx-88811331	AX-89847060	Affx-88811331	T	G	SNP-SNP	1	3939890	5	24818880	CTAGATGCAACTAAGCCCGGCCACATCATGTGCAT[G/T]CCCAAGATTCCCAAGCTGGAGAAACCCTAGCCTGC
Y	AX-166520220	Affx-88811333	AX-89817909	Affx-88811333	T	C	SNP	1	3953003	5	24802121	GGTGGTGGAGGTATGGGTGCAAACCATAACTCTAA[C/T]CCTAAAATGCTTGCTCCTAGTAGCAGCAGAAACCC
Y	AX-166520221	Affx-88811334	AX-89875031	Affx-88811334	T	C	SNP	1	3953499	5	24801625	CCATTGAAGGCCCACCAAACCCTCAATGAAGCCAG[C/T]AGCTTCTTCCTCGACTATGGTGGTGATGGAAGAAC
N	AX-89779820	Affx-88811337	AX-89779820	Affx-88811337	A	G	SNP	1	3962323	5	24792238	TATCTGTACATACCCTCTATTAGTTTCCTCATTAC[A/G]AATCTCGAGCAAGTTATCAAGGCCATTGTATCGTA
Y	AX-166527469	Affx-88811338	AX-89904249	Affx-88811338	A	G	SNP-SNP	1	3963278	5	24791283	TCATACTTAAGATGAACTCGAACCACAAGATGGGG[A/G]GTCTTCAAGTCGTATGTAGTCATACATCAGCCCTT
N	AX-166502876	Affx-88811340	AX-89779821	Affx-88811340	A	C	SNP	1	3965670	5	24788891	TTCCCATAGAAAGAATGGATCATCTCTAATTGGTG[A/C]GGAATTTAGATAGATAAAAACAGGGCCAAAAACCT
N	AX-166510795	Affx-88811341	AX-89817911	Affx-88811341	A	C	SNP	1	3967419	5	24787142	TCAACCAGTTCCTCATTCTCCACAATGACCCTAAA[A/C]TCTGTACCTTTTATCCTGTATAGCCATCAGATAAT
N	AX-166510797	Affx-88811347	AX-89817917	Affx-88811347	A	G	SNP	1	4037501	5	24716288	GACATACAAGGTGCCCAATACGGGCCATAATCAAT[A/G]TCACCCTACCATAAAATGATAGGGTCATATTTATG
N	AX-166510798	Affx-88811348	AX-89817918	Affx-88811348	T	C	SNP	1	4038932	5	24714857	CCCATCTGCTTTGCACCAAATGCGCACTACAAAAG[C/T]ACCCTCAATCTTCACAACCCAAAGCCGCTGAACCT
N	AX-166510117	Affx-88811354	AX-89811074	Affx-88811354	A	G	SNP-in-Insertion	1	4053575	5	24700018	AATGAGACCTTTTCCCTACCCACAATCATATGCTC[A/G]TTGTTGGTCTTGATCTCTAGTAGAATTGGCTCTGC
N	AX-89904251	Affx-88811361	AX-89904251	Affx-88811361	T	C	SNP-SNP	1	4062009	5	24691690	TAGGGCTAATGGGTATTTTCCAAAAAAAAAAAGGT[C/T]ACATGCTTTATAAAATTCTAAAAAGACTAAGATGT
Y	AX-166510799	Affx-88811366	AX-89817923	Affx-88811366	T	C	SNP	1	4072935	5	24679750	AAAGCGACGCGGATTATGAACATTCTAGAGGAGTC[C/T]GGTGCTGTCCTTGATGTAATAACTTACAATGTTTT
Y	AX-166510800	Affx-88811368	AX-89817924	Affx-88811368	A	G	SNP	1	4073186	5	24679499	TGTGATTACTTATACTATACTGATTGAAGCAACTT[A/G]CAAGGAAAGTGGGGTTGAGCAGGCGATGAAGCTTT
Y	AX-123365048	Affx-88811369	AX-89817925	Affx-88811369	A	G	SNP	1	4073544	5	24679141	GGTTTGTTGGGTCGAGCAATTGACATTTTGGAGAA[A/G]ATGCCTAAACATGGTTGTACTCCAAATTCCTTGAG
N	AX-89817925	Affx-88811369	AX-89817925	Affx-88811369	A	G	SNP	1	4073544	5	24679141	GGTTTGTTGGGTCGAGCAATTGACATTTTGGAGAA[A/G]ATGCCTAAACATGGTTGTACTCCAAATTCCTTGAG
N	AX-166510801	Affx-88811370	AX-89817926	Affx-88811370	A	G	SNP	1	4073589	5	24679096	CATGGTTGTACTCCAAATTCCTTGAGTTATAACCC[A/G]TTGCTTCATGGATTTTGCAAGGAGAAAAAGATGGA
Y	AX-166520223	Affx-88811370	AX-89817926	Affx-88811370	A	G	SNP	1	4073589	5	24679096	CATGGTTGTACTCCAAATTCCTTGAGTTATAACCC[A/G]TTGCTTCATGGATTTTGCAAGGAGAAAAAGATGGA
N	AX-166502878	Affx-88811372	AX-89779827	Affx-88811372	A	G	SNP	1	4074174	5	24678511	GGCTTAGCAGAAGAGGCTTTGGAGTTGCTCAATGA[A/G]TTGTGCTATAGAGGGGTGGTGAAGAGAAGTTCTGC
N	AX-166502879	Affx-88811378	AX-89779829	Affx-88811378	A	G	SNP	1	4078772	5	24673913	ATCCTTTATTCATTGAGGGCGATTTTCCCATGGAG[A/G]AAGAGAGTTCTTTACTAGCTTGTGAAGTTGAAAAG
Y	AX-166518627	Affx-88811379	AX-89803251	Affx-88811379	C	CAAG	Indel	1	4079080	5	24673602	AGCACCATTTCTACATCAATCTTGAAGGAGAAGGC[-/AAG]GATGGCTTCTAGGAGAAAAATGTTGCCGAGATATT
Y	AX-89779830	Affx-88811380	AX-89779830	Affx-88811380	T	C	SNP	1	4079701	5	24672984	GGTTAATGTAAAGTATAAGAGCACCGCCATGAAAG[C/T]CACTCCAACATCTAAGGCAGCTGAAAGAACATAAT
N	AX-166520224	Affx-88811383	AX-89817929	Affx-88811383	A	G	SNP	1	4081166	5	24671519	GAAACTGGTTATTCACAATTGCTGAAACGTTATAT[A/G]CTTGACCATGGGAATCAAACAAATCCGAAGAGAAG
N	AX-166520225	Affx-88811385	AX-89875051	Affx-88811385	A	C	SNP	1	4081259	5	24671426	ATAAGTTGAAACCCCAGTAGACAGTTGGCATGATC[A/C]AATACATGAAAGCAACATAGCCAACTGCAACATTA
Y	AX-89779832	Affx-88811386	AX-89779832	Affx-88811386	A	G	SNP	1	4081456	5	24671229	TTTGGGTATATCCAACAAATCCATGAAATAGTTGC[A/G]ATAGTTGGGAAAAGATAACCCGGGACAAAACCCCA
N	AX-166520226	Affx-88811387	AX-89875052	Affx-88811387	T	C	SNP	1	4081827	5	24670858	CATCTCCCCCGGATCCACCACGTACTTTCGGAGAA[C/T]TCCAGCCCACCCATAACCCAATACCTGTAAAAAAA
N	AX-89875056	Affx-88811395	AX-89875056	Affx-88811395	T	C	SNP	1	4085993	5	24666691	AATCAGAAAGAATTTTCCTCTTGACATCCGGTTGT[C/T]GTCTTTCTCGTGTAGAGCCCTTCATATTGTAACAA
N	AX-89875060	Affx-88811406	AX-89875060	Affx-88811406	T	G	SNP	1	4100367	5	24652310	CTTGGAAGAAGAGTAGCCATGGCAGCCGGGTTAGC[G/T]ATGACAAGTGAGCACAGGCATTACAATGGCAAGTT
Y	AX-166520227	Affx-88811408	AX-89875062	Affx-88811408	A	G	SNP	1	4101380	5	24651297	AGCCAAGCTGTTGCTACAACGTACACGAGGAATGG[A/G]GGATGTGGAAGCAGAACTGGATGATCTCATCGAAG
N	AX-166510802	Affx-88811410	AX-89817938	Affx-88811410	T	C	SNP	1	4101909	5	24650768	ATTTTTCCGTTGGAGATACGATCAGCTGGACAAAG[C/T]ATTACAGTGGCGGTAAACTTTCTGTTCACTTTTGC
Y	AX-166502880	Affx-88811411	AX-89779839	Affx-88811411	A	G	SNP	1	4102641	5	24650036	TTACTCTTGCTGATCCTTGATTTGCTAGATTCAGT[A/G]GGCGGTTTCCAGATGATATCCTCAAGATTGCTACA
Y	AX-166520228	Affx-88811413	AX-89817939	Affx-88811413	A	G	SNP	1	4103007	5	24649670	AAGTGCCTGCTTACTTCGAGAATAATGGAGAAATG[A/G]GAAGTTTTATTTGCCGAAAGACCCTCCACTCGCAT
Y	AX-89875065	Affx-88811415	AX-89875065	Affx-88811415	A	C	SNP	1	4107316	5	24645361	ATACAGGATGACCCCGCAGGACCAAACATCTGCCA[A/C]GGCACCATCATAACCCTTGTGACTGAGAACCTAGA
Y	AX-166510803	Affx-88811419	AX-89817942	Affx-88811419	A	G	SNP	1	4116255	5	24636422	TTCTGTTCAGCAGAAGGATCATCAGGAGTGTATAT[A/G]TATCCTTTCCCATACCCAAAATCCTTCATCAGCTT
N	AX-89904252	Affx-88811420	AX-89904252	Affx-88811420	A	C	SNP-SNP	1	4116390	5	24636287	TCTGCTGCACTATTCATTGCTTTATAAACAGCAAT[A/C]GATTTTGGAGCCAAAGCCAAGTAAGCCACACACTG
N	AX-166502881	Affx-88811423	AX-89779842	Affx-88811423	T	C	SNP	1	4145876	1	3177089	TTTGAAGTTGTTGATCGAAGGGCAAAGCTTGTTGT[C/T]AATGATTTGTCAGATGAGCAGCTGGCAGCTCAAGC
N	AX-166502882	Affx-88811424	AX-89779843	Affx-88811424	A	G	SNP	1	4146584	1	3177797	AAAGGTAGTGAATTTCATTTAAATGACAATAATGG[A/G]ACACCCTCTGAAAATCCTGTGATCCAAATAATCAA
Y	AX-166510804	Affx-88811425	AX-89817948	Affx-88811425	T	G	SNP	1	4150653	1	3181871	AGGGCCACCAAATTTCTCTGGCGGTATCCAACAGC[G/T]CGAATTATCTTGCTATTCTACCTGGTAAAACAGTT
N	AX-166520229	Affx-88811425	AX-89817948	Affx-88811425	T	G	SNP	1	4150653	1	3181871	AGGGCCACCAAATTTCTCTGGCGGTATCCAACAGC[G/T]CGAATTATCTTGCTATTCTACCTGGTAAAACAGTT
N	AX-123365050	Affx-88811428	AX-89875075	Affx-88811428	T	G	SNP	1	4158156	1	3189553	AGCTTAAAAGCAGATTGGTCACTTGTCAAGGTTGA[G/T]ATAATCGATGAAGAATACTGTCTTGTATGGTCCTT
Y	AX-166520230	Affx-88811434	AX-89817950	Affx-88811434	A	C	SNP	1	4162194	1	3193598	ATACTGCAGCTGGTTGACTTGTACTACACAGCACT[A/C]GATGCTGCAAAGAAAGGCGTAAAGGTCAGCTATCT
Y	AX-123360129	Affx-88811435	AX-89817951	Affx-88811435	A	G	SNP	1	4162477	1	3193881	GGATCAATTTATAACAGGGTGGATGAGCATCAAAC[A/G]GAGGACCGTTCTCTCAAAGGTGATACCCATGTTTT
N	AX-166520231	Affx-88811435	AX-89817951	Affx-88811435	A	G	SNP	1	4162477	1	3193881	GGATCAATTTATAACAGGGTGGATGAGCATCAAAC[A/G]GAGGACCGTTCTCTCAAAGGTGATACCCATGTTTT
N	AX-166510805	Affx-88811442	AX-89817953	Affx-88811442	T	G	SNP	1	4169303	1	3200707	ATGAAAGCTTATTTGTCAAGGACTATAATTGCACT[G/T]CTAGTGTATGGAGGGGTACCAAAAGACCTTTTTAT
N	AX-123360131	Affx-88811447	AX-89817956	Affx-88811447	T	G	SNP	1	4177865	1	3209475	TGTTTCTTGTAGACAAAGATTCCAGTGGAAGAGAC[G/T]CGCAAAAAGATCTGGCTTGTTGATTCAAAGGTGTG
Y	AX-123524226	Affx-88811447	AX-89817956	Affx-88811447	T	G	SNP	1	4177865	1	3209475	TGTTTCTTGTAGACAAAGATTCCAGTGGAAGAGAC[G/T]CGCAAAAAGATCTGGCTTGTTGATTCAAAGGTGTG
N	AX-166510806	Affx-88811448	AX-89817957	Affx-88811448	T	G	SNP	1	4178370	1	3209980	GTGTGTGCCTGTTTTATTGACATTTAGATACAAAT[G/T]ATGCAGAAACCTCTCATTTTGGCTCTTTCTAATCC
N	AX-166520232	Affx-88811448	AX-89817957	Affx-88811448	T	G	SNP	1	4178370	1	3209980	GTGTGTGCCTGTTTTATTGACATTTAGATACAAAT[G/T]ATGCAGAAACCTCTCATTTTGGCTCTTTCTAATCC
N	AX-166520233	Affx-88811449	AX-89875083	Affx-88811449	T	C	SNP	1	4178768	1	3210378	GCTTACATTTTCCCCGGACTTGGCCTTGGTTTGGT[C/T]ATCTCTGGAGCAATCCGTGTGCATGATGATATGCT
N	AX-123357053	Affx-88811450	AX-89779855	Affx-88811450	A	G	SNP	1	4179225	1	3210835	TGCTGAGAGTTGCATGTATAGTCCTCTCTACAGAA[A/G]CTACCGGTAAACAGTCTGCCATCCCAAAAGCTTAT
N	AX-123357054	Affx-88811451	AX-89779856	Affx-88811451	T	C	SNP	1	4181443	1	3213053	TTAACCGAGATTAGACCTTCATAGTGTAGTAATCG[C/T]AACGTCGCAATAGCCTCACCAAGCATTTCTTGCTT
N	AX-166509135	Affx-88811453	AX-89803252	Affx-88811453	T	TCCA	Indel	1	4185145	1	3216756	AGCATCAGCATTCACCATAGCGTTTGTCATCTTCT[-/CCA]CCACACTAGTTGCATCAACAATGTTGCTGTTGTTG
N	AX-166518993	Affx-88811454	AX-89862691	Affx-88811454	G	GGTAC	Indel	1	4186498	1	3218109	TCGGATCTGGCGATCCACTTTGATATGCAATCCCG[-/GTAC]GTGGTAGACATGGCTACATTGTGTTTGCTTACCAC
N	AX-166519459	Affx-88811455	AX-89867497	Affx-88811455	A	C	SNP-in-Insertion	1	4190537	1	3222149	AGCTTCATGGAGTTCCATCGCTCGGGCCCACCGTA[A/C]TATGCGTACATTAGATTCCTCCCCGATAGCGCGTT
N	AX-123357055	Affx-88811458	AX-89779858	Affx-88811458	A	G	SNP	1	4194097	1	3225708	GAGGATGAGTGTTTGATCTTGGCAAGTGATGGACT[A/G]TGGGATGTAATGACTAATGAAGAGGTTGGGGAGGT
N	AX-166502884	Affx-88811461	AX-89779861	Affx-88811461	T	C	SNP	1	4196877	1	3228494	CAAATGATAATGGCTAATGTTTATGTTGTCACAGG[C/T]ATGAACCAGAATTTGATCCCCAACAGATAGATCAG
N	AX-166502885	Affx-88811462	AX-89779862	Affx-88811462	T	C	SNP	1	4198363	1	3229983	AACAAGGGCAGTGTGCTTCCTATACCATTGAACAT[C/T]TAGCTCCCTTATATCAACTCCATCTACCTTCACTG
N	AX-166520234	Affx-88811464	AX-89875084	Affx-88811464	A	G	SNP	1	4200256	1	3231876	AATGGCTATCCGCTGCTTTTGTCCCCCAGATAAAA[A/G]TGATCCTCGCTCTCCAATCTGTCAAATACCACTAC
Y	AX-166502886	Affx-88811465	AX-89779864	Affx-88811465	T	C	SNP	1	4200409	1	3232029	TAAATAATACCTTGGTTTCATACCCTTCAGGAAGC[C/T]GCCTTATGAAATTGTGAGCATTGGCAGCCATGGCT
N	AX-166509630	Affx-88811467	AX-89806468	Affx-88811467	C	CTGCA	Indel	1	4203091	1	3234712	CTGCTAATCCCAAGTATACAAAGTATAAACTGCAC[-/TGCA]TGTTCATCCAAACACAATGAAAAGAAGGAAAATGT
N	AX-123508211	Affx-88811468	AX-89779865	Affx-88811468	T	C	SNP	1	4203436	1	3235056	TAGCACAACATCAACCCAATCAGCATATCTGAAAA[C/T]TGTGAATACTGAATCTGCGGACTTCTTCTTCTTCT
N	AX-166527498	Affx-88811469	AX-89904253	Affx-88811469	A	G	SNP-SNP	1	4204159	1	3235779	CAGTCTCAAAACAACTAAACAAACCATAAAGAATA[A/G]CACGCCTCTCAGGCATTCAGGGATCAGAGAAGATA
N	AX-89860598	Affx-88811471	AX-89860598	Affx-88811471	G	GACA	Indel	1	4209571	1	3241192	CAAAAAGTCACAATCTTGACAACCATATAACTTAG[-/ACA]ACAATGGTGAATCAAACATGTTCTTATATCTAATC
Y	AX-166502887	Affx-88811474	AX-89779870	Affx-88811474	A	G	SNP	1	4214012	1	3245633	TATTCCTTCAAAAACGAGTCCAGAAATCCCAAGTG[A/G]CTCGCATACTGCTCCGGAAAAGTTACACCGTAGCT
N	AX-123365052	Affx-88811477	AX-89875087	Affx-88811477	A	G	SNP	1	4214390	1	3246011	GTACTGGTGGCAGCTTTGGATTTGGATTTGGAACT[A/G]GAACAACTGAAGCAACCCATAGCTGTTGTAGCTTT
N	AX-166502888	Affx-88811482	AX-89779873	Affx-88811482	A	G	SNP	1	4219027	1	3250650	TCTTTCATGTTTTATAGGCCACAGCATGCTAGCCT[A/G]GTCTATGACATGGTTCACGAATTCTATATTGGAGA
N	AX-166520235	Affx-88811483	AX-89875090	Affx-88811483	T	C	SNP	1	4220449	1	3252075	GATAGCATGTTGCATAGATGGACTTCTATCCTTGT[C/T]AAGTTCCACATTGAAAGAAGTTCCACAATAGTGCA
N	AX-123462237	Affx-88811484	AX-89779874	Affx-88811484	T	C	SNP	1	4221004	1	3252630	AATCCCCATGAGAGATAGCAGTGGACAGTAAATAA[C/T]GCGCGGTTCATAATCCAGTTAACCTTTGTTAAATA
Y	AX-123367777	Affx-88811487	AX-89875092	Affx-88811487	T	C	SNP	1	4229519	NA	NA	TGTAGAATCTTGATCCAGTCCGTTATTCTGCTGAG[C/T]AACCACATGAACTTCACTCTTCTCATTGTTTCCCA
N	AX-166520236	Affx-88811492	AX-89817964	Affx-88811492	T	C	SNP	1	4240559	NA	3273081	ACTGAGTTGGACCTCTCAGAAAACCAATTTTCTGG[C/T]GAGATTCCAAATCAATTTGCCATTCTGAAACTCAA
Y	AX-166510807	Affx-88811496	AX-89817966	Affx-88811496	A	G	SNP	1	4247669	1	3280193	CTCAGTCCGCCTCTTCCATAATTAGTTCATTGCAC[A/G]GCACCCACGAACAAGAGGTACTCACTGAAACTCCT
Y	AX-166510808	Affx-88811497	AX-89817967	Affx-88811497	A	G	SNP	1	4250353	1	3282877	AAGGTGGTGATAGAGACAGATATTTCGGGTTAAAA[A/G]TTGGCGGTTTAGAGGATGGCGATGTCGCCGGTGGT
N	AX-123360133	Affx-88811501	AX-89817970	Affx-88811501	A	G	SNP	1	4253936	1	3286460	GACCAACAAGAACATCACGGAGGATAGGCTTGAAA[A/G]AGAGTTTCTTGCAGAAGTCAAGATACTGAGCTCAA
Y	AX-123365053	Affx-88811502	AX-89875101	Affx-88811502	A	G	SNP	1	4254168	NA	NA	CTGGACTGGCCTAAGAGGTTGCAGATTGCAGTGGG[A/G]GCTGCTAAGGGCCTCTGCTATATGCATCATGACTG
Y	AX-166510809	Affx-88811505	AX-89817973	Affx-88811505	T	G	SNP	1	4265530	NA	NA	CTCCAGAGCTTGGTAAGCATTCGCTGCTTGAAGAC[G/T]TCCAGGTTTCGGTGAATAGGCTTACCGGGAAGCTG
Y	AX-166520237	Affx-88811511	AX-89817978	Affx-88811511	A	G	SNP	1	4269448	1	3302417	AAACAAGCCACCATCCAATGCTACCACTGACTTGT[A/G]CTTCTCTCCATCCTTTACCGTGTCTCTACCCAACT
N	AX-166510810	Affx-88811513	AX-89817980	Affx-88811513	T	G	SNP	1	4271597	1	3304566	ACACGCTTTTCTTTCCCACCAAGCTGTACGCGCAG[G/T]ACACGGAAATTTGTCCCACCAAGGTCTAATGCATA
N	AX-166520238	Affx-88811513	AX-89817980	Affx-88811513	T	G	SNP	1	4271597	1	3304566	ACACGCTTTTCTTTCCCACCAAGCTGTACGCGCAG[G/T]ACACGGAAATTTGTCCCACCAAGGTCTAATGCATA
Y	AX-166527429	Affx-88811515	AX-89904254	Affx-88811515	A	G	SNP-SNP	1	4278533	1	3311502	CTTGGAGGGGTCCCGAAGGGGATCATTAGTGCCCA[A/G]CTTTGGAAGAGACTTGTTGTATCACTTGTATGCTT
Y	AX-166502893	Affx-88811517	AX-89779885	Affx-88811517	T	C	SNP	1	4297036	1	3330012	TTGGTGTCCTGTTTTGAGTACAAGAAAGCTTCAAG[C/T]TTTGGCAGAGAGGCGAGTCCTCCTCCGGAGACTAT
Y	AX-166510812	Affx-88811518	AX-89817985	Affx-88811518	A	C	SNP	1	4297163	1	3330139	GGCTGAGGTCCTTCTACAATGAAACAGAGAACGAG[A/C]AGAGCAAGCACGCAATTGCAGTTGCGGCCGCTACG
Y	AX-123363508	Affx-88811519	AX-89847064	Affx-88811519	A	T	SNP-SNP	1	4298398	1	3331374	GATGCAGAGGTCTTGTTCACAAGTGCAGGAAGTCA[A/T]TAATTTCAAGAATGCTGTGATGGGGAAGCTTGATA
Y	AX-123360135	Affx-88811520	AX-89817986	Affx-88811520	T	G	SNP	1	4301585	NA	NA	ACCCTCTTCTCCTCCTTATCAATCTCAGCTGCTTT[G/T]GGGGTCAATTTAAACCAGGGATAATTGTATTCCCC
N	AX-89869434	Affx-88811523	AX-89869434	Affx-88811523	A	C	Codon-based	1	4308404	1	3342172	AATCAAATAGTTGTACCGACCATTACTATCATCAT[A/C]GGAACATATTCTGAGTGTCTTCACTGTAGGGGAAG
N	AX-166510813	Affx-88811531	AX-89817990	Affx-88811531	A	G	SNP	1	4338004	1	3372097	ATAAAACAAAACAATGGCTGGCCTTCTATAAGGAA[A/G]AAAGATCATTTTAAGGTGAGAGAGCTGAATGACAG
N	AX-123360136	Affx-88811532	AX-89817991	Affx-88811532	T	C	SNP	1	4338041	1	3372134	AAGATCATTTTAAGGTGAGAGAGCTGAATGACAGA[C/T]TAATGATGGCAGAGCGTGCGTTTACAGATCAAGAT
N	AX-89862692	Affx-88811534	AX-89862692	Affx-88811534	G	GATGTC	Indel	1	4344060	1	3378168	TTAGTTTGGTTGGGTTGAGTGTCCTCTTTGTGGTG[-/ATGTC]ATGTCAATGACCAGAATGTGTACACTTCATTGGCG
Y	AX-123365054	Affx-88811535	AX-89875117	Affx-88811535	A	G	SNP	1	4345814	1	3379925	GTTTGTTGACAGTGGGTGGCGTTATGGGCTTTCTG[A/G]AGAGTGGCAGCAACAAGTCACCGTCAGCATCCTGG
N	AX-166502894	Affx-88811540	AX-89779888	Affx-88811540	A	G	SNP	1	4348275	1	3382545	CCGCCATGGCCACCTTTCTTGGGCGATCCATTCAT[A/G]CCCGACCCTGATCTCCTGTCCTTCTTCACCTGATC
N	AX-166510816	Affx-88811543	AX-89817997	Affx-88811543	A	G	SNP	1	4352492	1	3386771	TCGTGAGGCATGGCTTCAAATTTGTGAAGTCAGCC[A/G]TAGAGAGTTTCAAATGGTCTATGAACGCCTTGGAA
N	AX-166502895	Affx-88811545	AX-89779890	Affx-88811545	T	C	SNP	1	4354178	1	3388457	GATGTGGTTCGATTGGTTGATTTACTTGATGAAGC[C/T]AAGAGCCGAAGCAAAACAAGTCTTGTCGAGCGTGG
Y	AX-123363510	Affx-88811555	AX-89847067	Affx-88811555	T	G	SNP-SNP	1	4361831	1	3395553	CCCTAAATCAATTAGAAACTATGATTGCATGCGCA[G/T]AGGCCTTATGGTTAAGAGAACGCTCTTTCCAATTT
Y	AX-166502896	Affx-88811556	AX-89779894	Affx-88811556	A	G	SNP	1	4362103	1	3395825	TCCAAGGAAAATTCAACATTGAGCTCCTTACTATC[A/G]GAAGGCTGTTCAAATAAACCAAAAAAGGTAATTAA
N	AX-166502897	Affx-88811561	AX-89779897	Affx-88811561	T	G	SNP	1	4366834	1	3400557	ACGATAATGTAGTAGGACTTCATATGGTTTCAAGT[G/T]TACCATCAGCTGATATATGGAAGACAGTGGATTTT
Y	AX-166510818	Affx-88811563	AX-89818003	Affx-88811563	A	C	SNP	1	4369875	1	3403598	TTGCCATTTTCCCAGTTCCAAACTAATGCAGATAC[A/C]TGGCTTAAGAACAGCATTCTGCCTTACTATCCGGC
N	AX-166520241	Affx-88811563	AX-89818003	Affx-88811563	A	C	SNP	1	4369875	1	3403598	TTGCCATTTTCCCAGTTCCAAACTAATGCAGATAC[A/C]TGGCTTAAGAACAGCATTCTGCCTTACTATCCGGC
N	AX-166520242	Affx-88811564	AX-89818004	Affx-88811564	T	C	SNP	1	4369907	1	3403630	TACCTGGCTTAAGAACAGCATTCTGCCTTACTATC[C/T]GGCTACAAAGATCACATACATAACAGTGGGAGCTG
Y	AX-89818004	Affx-88811564	AX-89818004	Affx-88811564	T	C	SNP	1	4369907	1	3403630	TACCTGGCTTAAGAACAGCATTCTGCCTTACTATC[C/T]GGCTACAAAGATCACATACATAACAGTGGGAGCTG
N	AX-166502898	Affx-88811566	AX-89779900	Affx-88811566	A	G	SNP	1	4370379	1	3404102	AATTTCAAAACAATCAATGTTATGGTCACTGAGAC[A/G]GGCTGGCCGTCAAAAGGATCGCCGAAAGAGACAGC
N	AX-166510819	Affx-88811569	AX-89818006	Affx-88811569	T	C	SNP	1	4370603	1	3404326	GAATTGGGGGCTATTTTATCCTGACCAGACAAGCG[C/T]CTACAACCTAGATTTCACTGGAAAAAATGCTGTGG
N	AX-166502899	Affx-88811571	AX-89779901	Affx-88811571	T	C	SNP	1	4372323	1	3406046	GGAGTCCTTGTCCTGTCAATAAGGTCAGGATAGAA[C/T]ATGTTGAACTTATATCCTAGCACAACCTTTGGAGG
Y	AX-123366826	Affx-88811576	AX-89904256	Affx-88811576	T	C	SNP-SNP	1	4378127	1	3412082	AAATCAATTTGCCACATCCATCTGCTGAAATCCAG[C/T]GGAAACAAGTACCTCACTTTAAAATCTTACAATAC
N	AX-166510821	Affx-88811578	AX-89818011	Affx-88811578	A	G	SNP	1	4383580	1	3417526	TTTCCACCTGCCAATGGATGCAACACGGTCAAGAA[A/G]TGGTACAGATGTCCAGCAATGATCCCCAGCAGATC
N	AX-166520245	Affx-88811578	AX-89818011	Affx-88811578	A	G	SNP	1	4383580	1	3417526	TTTCCACCTGCCAATGGATGCAACACGGTCAAGAA[A/G]TGGTACAGATGTCCAGCAATGATCCCCAGCAGATC
N	AX-89779904	Affx-88811580	AX-89779904	Affx-88811580	A	G	SNP	1	4383912	1	3417858	ATCCCCAAGAATGGAGACCAAAACATTGGGATGGC[A/G]GATAAAACCTACAATTTCAAGACAAGCATAAGAGG
N	AX-166502901	Affx-88811582	AX-89779906	Affx-88811582	A	G	SNP	1	4384580	1	3418526	AGAGAACTTCCCGAGGAAAAAGAAATTTGTAATCA[A/G]CCTCCACACCTACAACAGAAGGTGAAGTCAAAGAA
Y	AX-123520428	Affx-88811587	AX-89779909	Affx-88811587	A	G	SNP	1	4393915	1	3427859	GCTACAAGTTTGAGCTTGTCACTGACAATGGTCCT[A/G]GTAGCAGCATTACCATCGCGGAAGCTACATTGAGC
N	AX-123516073	Affx-88811590	AX-89779910	Affx-88811590	T	C	SNP	1	4394217	1	3428161	CTCTTCTCACATAAACTAAGGAAGGAGCTTTGCTA[C/T]GATGAACAGAATTTCTTGTCTTAGAAACTGGTTGG
N	AX-166502902	Affx-88811593	AX-89779911	Affx-88811593	T	C	SNP	1	4398008	1	3431957	GAAACCAAAGTTACTTGGGAAGTTGCCACTGAACT[C/T]GTTATTAGCTAAGTTGATGACAGAAGCTTGCGCAT
N	AX-166510822	Affx-88811594	AX-89818015	Affx-88811594	T	C	SNP	1	4398414	1	3432363	ATTCCAGCCACAATGGTTTGGCCATCCTCAGAATC[C/T]GCACAGAAGACTCCTTTGTAAGAACACACATCTGG
Y	AX-166520246	Affx-88811594	AX-89818015	Affx-88811594	T	C	SNP	1	4398414	1	3432363	ATTCCAGCCACAATGGTTTGGCCATCCTCAGAATC[C/T]GCACAGAAGACTCCTTTGTAAGAACACACATCTGG
N	AX-166518994	Affx-88811602	AX-89862693	Affx-88811602	T	TGGC	Indel	1	4420745	1	3454653	AAGTTACTGACCTTGAGAGCCCGGAGGCGTGACGT[-/GGC]GGCGGTCTTGAACATAGCGGCGACGCCGTTAGTGG
N	AX-123614831	Affx-88811603	AX-89860603	Affx-88811603	G	GGGTC	Indel	1	4421024	1	3454932	CGCGTTTTGGGTTTCGGTTGGGTTTTACTCAACCG[-/GGTC]GAGAATAAAGTGTAACTTTCCTTTGTAGTTTCTTG
N	AX-166510824	Affx-88811606	AX-89818019	Affx-88811606	T	C	SNP	1	4425563	1	3459472	GGGGTTTGGCTCAAAATACTACAAGAGCAAGCTGA[C/T]CTTGTCCCAATTGCAATTCAGGTGACAATTTGATA
N	AX-166520247	Affx-88811608	AX-89818021	Affx-88811608	T	C	SNP	1	4425786	1	3459695	AACATATTGGATTCCAAGTGAGCCTTGTATGCTTC[C/T]TGATAGCCCTTCGCATCATATTGGTATTGGGGCTT
Y	AX-89818021	Affx-88811608	AX-89818021	Affx-88811608	T	C	SNP	1	4425786	1	3459695	AACATATTGGATTCCAAGTGAGCCTTGTATGCTTC[C/T]TGATAGCCCTTCGCATCATATTGGTATTGGGGCTT
Y	AX-89818022	Affx-88811609	AX-89818022	Affx-88811609	T	C	SNP	1	4426520	1	3460429	ATGCACACAAGGTTGCATTTGAGCAGTCAGACTTG[C/T]TGTTTGTGTGCATGCTTAAGCCTTTGTCATCTGAG
N	AX-89875150	Affx-88811609	AX-89818022	Affx-88811609	T	C	SNP	1	4426520	1	3460429	ATGCACACAAGGTTGCATTTGAGCAGTCAGACTTG[C/T]TGTTTGTGTGCATGCTTAAGCCTTTGTCATCTGAG
N	AX-89875153	Affx-88811610	AX-89818025	Affx-88811610	T	C	SNP	1	4431002	1	3464912	AGCACCAGGTTGTGATAACAGACCGAATGTGGGCT[C/T]GGCTCCTATCTTCCACAAACCAACCAAGCTTTCTG
Y	AX-166510094	Affx-88811611	AX-89809161	Affx-88811611	A	C	F.innumae-derived	1	4431808	1	3465718	ATCTGAAAAGCTAGAGAGATGGAGTAGTTGCACCA[A/C]CAATGCTTGGGGCGCTTGTTGCACCAGAAGAAGTT
N	AX-166510826	Affx-88811615	AX-89818026	Affx-88811615	A	G	SNP	1	4439629	1	3472892	TGTAAAGCCGTCTCGTATTGTTTCAAGAAGATGAA[A/G]ACTTGCCTTGGAGTCGATGAAGAAATAGTCCATGA
N	AX-166502904	Affx-88811617	AX-89779921	Affx-88811617	A	C	SNP	1	4441785	1	3475048	CATGCAACTTGATTTAAACCACAATTACAGTATTA[A/C]ACAACAATCATATCGATACACGCAACCACCACAGG
N	AX-89779926	Affx-88811626	AX-89779926	Affx-88811626	T	C	SNP	1	4446843	1	3480107	CAAGAGTAGAACAGAAATGACCAAACCAACGAGAT[C/T]CTGAGACAAAGACGAAAGAGTGCAAGTGAGGTCAG
N	AX-123365059	Affx-88811627	AX-89818028	Affx-88811627	T	C	SNP	1	4448286	1	3481550	AAGCAGCTAAACCATTGATCTCATCCACAAACCTA[C/T]TGAATGCATCCTCATATCTGCCAATGAAGTACTTA
N	AX-166520249	Affx-88811633	AX-89818029	Affx-88811633	A	C	SNP	1	4450848	1	3484113	CTCCATCAGCTCTAAGAGAGCCAGCAACAGACAAA[A/C]TAGACAATGAGCGGTCCAATGAACCCAGTACTGTT
N	AX-166520250	Affx-88811635	AX-89818031	Affx-88811635	A	G	SNP	1	4451608	1	3484873	AAAACATTTAAAGCAAGAGACAGAAGGCATACCCA[A/G]ACCAGATGCAGTAATTACCCCAGAAGAGTGTACAA
N	AX-89818032	Affx-88811642	AX-89818032	Affx-88811642	T	G	SNP	1	4454014	1	3487280	TCACCACGCCTACTAAAAACATTGATAGAAACTCT[G/T]CCCCCTCCTCCTCCAGCAAATCCGTTACCCCCAAT
Y	AX-166502905	Affx-88811646	AX-89779931	Affx-88811646	A	G	SNP	1	4459613	1	3492880	ACAAAGAAAACATCACAATCCAAACCTGAATGTCT[A/G]GCCAAATGCATTGATGTCAGGGGCAATGAACTCAT
N	AX-166520251	Affx-88811650	AX-89875163	Affx-88811650	T	C	SNP	1	4482978	1	3516657	AATTCTGTTCGGGTTAGCAACCTTTCGGAGGATGC[C/T]CGGGATGCCGATTTGTATGAACTCTTTAGTCCTTT
N	AX-166502907	Affx-88811651	AX-89779935	Affx-88811651	T	C	SNP	1	4484347	1	3518026	AGAAGACAATGTTATCTGTACTCTCTTTAGAAGCA[C/T]TGGAAGCAGGCAATTAATAAGTTCAATACCCAAGT
Y	AX-123360137	Affx-88811654	AX-89818037	Affx-88811654	A	G	SNP	1	4487144	1	3520829	GGACTCACCCAATGCACAATGTGGATTCTTTCGTC[A/G]CTTCTTATGACTGCAGGTTGGCCTGTGATCAGTTC
N	AX-123524228	Affx-88811654	AX-89818037	Affx-88811654	A	G	SNP	1	4487144	1	3520829	GGACTCACCCAATGCACAATGTGGATTCTTTCGTC[A/G]CTTCTTATGACTGCAGGTTGGCCTGTGATCAGTTC
N	AX-123365060	Affx-88811656	AX-89875167	Affx-88811656	T	C	SNP	1	4487356	1	3521041	GACATACTCTGGGTCTAAATAACCTGCTGTCCCCA[C/T]AACTGTTGTTTCCACATCAGTTTCACTGTCATTGG
Y	AX-166502908	Affx-88811657	AX-89779936	Affx-88811657	A	G	SNP	1	4487418	1	3521103	TGTCATTGGTGAAAACCTTAGAAAGACCGAAATCT[A/G]CAATCTTAGCTTCCAAGTTTTCACTTAAGAGAATG
Y	AX-166510827	Affx-88811658	AX-89818039	Affx-88811658	T	C	SNP	1	4487637	1	3521322	TTGTGCAGCATCTATGGCGATGCGAAGTCTCAATT[C/T]CCAAGTCATACATGAGCTTTTAACTGTAACCATAA
Y	AX-166510828	Affx-88811663	AX-89818042	Affx-88811663	T	C	SNP	1	4490043	1	3523728	GACCAGAAGTTGACATCAAAATACAGATCAAACTC[C/T]GGTAGCTTGTCTTTTCCATCATAGTTTCCATACAA
Y	AX-166518629	Affx-88811665	AX-89803259	Affx-88811665	G	GAGTA	Indel	1	4492657	1	3526345	TCCTCAATATCTTTCTCATTCAAATCATGATCAGG[-/AGTA]CCTTCTTGTTCATGGCCATAATGATGCGCATGATA
N	AX-166510829	Affx-88811667	AX-89818044	Affx-88811667	T	G	SNP	1	4492835	1	3526522	CGCACTTACACAAGAATTTCCGCTTCATCTGTATT[G/T]CCGATCTTGGCTTAAGGTTTTGTTTCACCCGAATT
Y	AX-166520252	Affx-88811667	AX-89818044	Affx-88811667	T	G	SNP	1	4492835	1	3526522	CGCACTTACACAAGAATTTCCGCTTCATCTGTATT[G/T]CCGATCTTGGCTTAAGGTTTTGTTTCACCCGAATT
N	AX-123357056	Affx-88811668	AX-89779937	Affx-88811668	T	C	SNP	1	4492938	1	3526625	GAGAAGGTTATCCTTTGTGGAAGACAAATTTGATG[C/T]AGAGAAAATTGAAGTCTTGTACTGAGTGATATGGT
N	AX-166510220	Affx-88811672	AX-89812421	Affx-88811672	T	G	Codon-based	1	4501800	NA	3535628	GGATTTGGTGAATAGCTACAAGGGGGTTGTAGGCC[G/T]GGTTTTCGGCAATGAGAAATCTTCGTCTTCAAATG
Y	AX-166510831	Affx-88811678	AX-89818048	Affx-88811678	T	G	SNP	1	4511948	1	3545781	AATTTGAAACCAGTAAGCTTATCAGAGCTGAACTT[G/T]ACCGGCTGGGCATCCCTTACAGATACCCTTTGGCT
N	AX-166510832	Affx-88811679	AX-89818049	Affx-88811679	A	G	SNP	1	4514114	1	3547947	TTATGGGGGCAGAAGACTTCTCATTCTATCAAGAA[A/G]TAATTCCAGGGTACTACTTCTTTCTTGGTATGAAG
Y	AX-123363511	Affx-88811682	AX-89847069	Affx-88811682	A	G	SNP-SNP	1	4515222	1	3549055	AAGCCAAGGATAACAGATGATTCGAGTTCAAGACA[A/G]ACTGCAGCAAAAGAAGAGAAACAAGGCGGCTCAAC
Y	AX-123357057	Affx-88811683	AX-89779941	Affx-88811683	A	G	SNP	1	4515367	1	3549200	ATGAATGTCTGAAAGAGGCCATCCTCTACTGCAAC[A/G]AGTCTGGATTAACATCAAAATAACAATTCAGCTTC
Y	AX-123614962	Affx-88811684	AX-89862697	Affx-88811684	T	TCGG	Indel	1	4515963	1	3549797	TTTTCCTTTCCCAATCCAACTATCTCTTTGTTGAT[-/CGG]CGGTAACAATACCAAGAGCACTTTTGGATTTAAAA
Y	AX-166520253	Affx-88811686	AX-89818051	Affx-88811686	A	G	SNP	1	4516153	1	3549986	AGTACTATATATGCTTCTTTCACTTCCAGAGTTCC[A/G]GTTTCTCTGAAGAGACCAAACACACAACAAACTCA
N	AX-89818054	Affx-88811691	AX-89818054	Affx-88811691	T	C	SNP	1	4519410	1	3553243	TTCGCTTGCGTGGCCTCTTTGATTGCAGAGTCCAA[C/T]TTTTGGAGCTTGAAATACGCCTCTGCATTGGTTAG
Y	AX-166520254	Affx-88811698	AX-89818055	Affx-88811698	T	C	SNP	1	4523366	1	3557200	CCAGATTTGGCAAGCTATAGTGTGCTGATGGTGGA[C/T]GAGGCCCATGAGAGAACACTGTCTACTGATATTTT
Y	AX-166502909	Affx-88811699	AX-89779943	Affx-88811699	T	C	SNP	1	4523427	1	3557261	CTGATATTTTATTTGCATTAGTAAAGGATATTGCT[C/T]GATTTCGACCTGATTTTAAGCTGCTTATCTCAAGT
N	AX-166510833	Affx-88811701	AX-89818056	Affx-88811701	T	C	SNP	1	4523636	1	3557470	GCAATTCAAATCCATGTCAGGGAACCACCTGGAGA[C/T]ATATTGGTCTTCCTCACTGGTCAAGAAGATATAGA
N	AX-166520255	Affx-88811701	AX-89818056	Affx-88811701	T	C	SNP	1	4523636	1	3557470	GCAATTCAAATCCATGTCAGGGAACCACCTGGAGA[C/T]ATATTGGTCTTCCTCACTGGTCAAGAAGATATAGA
N	AX-166510834	Affx-88811702	AX-89818057	Affx-88811702	A	G	SNP	1	4523933	1	3557767	AAGTCCTACAATCCAAGGACTGGGATGGAGTCATT[A/G]CAAGTCACTCCCATCTCAAAGGCATCGGCAAGGCA
Y	AX-123360141	Affx-88811703	AX-89818058	Affx-88811703	T	C	SNP	1	4524056	1	3557890	ACTTTTGACAGTTATATTCATGAACTGGATGATAC[C/T]ACTACACCTGAAATACTAAGGACTAACCTGGCACA
Y	AX-123357058	Affx-88811704	AX-89779945	Affx-88811704	A	C	SNP	1	4524219	1	3558053	TTGAACTGTTATTTGCTCTGTCTGCATTGAATAAA[A/C]TGGGAGAGTTGACTAAAGTTGGTAGGCGGATGGCA
N	AX-166510835	Affx-88811705	AX-89818059	Affx-88811705	A	G	SNP	1	4524294	1	3558128	TTCCGCTTGATCCAATGTTATCTAAGATGGTAGTC[A/G]CTTCTGACAGGTACAATTGCTCAAACGAGATCATT
N	AX-166502910	Affx-88811706	AX-89779946	Affx-88811706	T	C	SNP	1	4524431	1	3558265	GCTGACAATGCAAGAAGGAATTTTCACACTGGGGA[C/T]GCAGGAGATCACATTGCCTTGCTTAATGTTTACAA
N	AX-166510836	Affx-88811708	AX-89818060	Affx-88811708	A	C	SNP	1	4526674	1	3560508	GGGTGACTTGTTGATTGTTGAGAGATTGTTGGGAC[A/C]AGAGGAAACCGATGGACTGATGATGCTGAGTTTCA
N	AX-166520256	Affx-88811708	AX-89818060	Affx-88811708	A	C	SNP	1	4526674	1	3560508	GGGTGACTTGTTGATTGTTGAGAGATTGTTGGGAC[A/C]AGAGGAAACCGATGGACTGATGATGCTGAGTTTCA
N	AX-166510837	Affx-88811712	AX-89818061	Affx-88811712	T	G	SNP	1	4528861	1	3562695	TCTGTTATTAATCGGAGGAGGACAAAAACATTGGA[G/T]TTGTCCCATGAGTGACAGGTGCAGTACTGCAACAT
Y	AX-123614510	Affx-88811713	AX-89806476	Affx-88811713	G	GATAT	Indel	1	4529262	1	3563097	AGGGTACATGCAGCCAAATTCTATATACTACACGG[-/ATAT]ATGATGTAGCTCTGCAGGGAGAGAAAAGATCAGAA
Y	AX-89818064	Affx-88811718	AX-89818064	Affx-88811718	A	G	SNP	1	4531558	1	3565392	AAGTGACTACGGGATACATGTGGCAGGGCTTGGTG[A/G]TGAACGTTGTACTCAATCCCGTCTTGTTCAAACAT
Y	AX-123365061	Affx-88811720	AX-89875193	Affx-88811720	A	G	SNP	1	4531849	1	3565683	CCAGCCAAATTCTATATACTACACGAATGATGTAG[A/G]TCATGTAGTTGTGGGAGGACGAAGATCAGAAGACA
N	AX-123357060	Affx-88811723	AX-89779953	Affx-88811723	A	G	SNP	1	4534885	1	3568722	AAGGCATCTGTTGATCTTAACCAAAACATAAAACC[A/G]CCTAGGGTTTTTCGTCGTAAAAGGTACGATCTCGT
N	AX-89875195	Affx-88811727	AX-89875195	Affx-88811727	T	C	SNP	1	4540042	1	3573879	ATGGTGAACTCCCTGGTCACCACCTCTTCCTTTCG[C/T]CCCTTTGTCTTCTCAACCATTTTCACACTCTCCTC
N	AX-89818071	Affx-88811731	AX-89818071	Affx-88811731	T	C	SNP	1	4545021	1	3578853	CCATCGTTACCCTGGATTAGGTTTTGTGCTAACAA[C/T]TTCTTCTGGAATATGTTCTTCATCCCATGGAGAAA
N	AX-89875202	Affx-88811731	AX-89818071	Affx-88811731	T	C	SNP	1	4545021	1	3578853	CCATCGTTACCCTGGATTAGGTTTTGTGCTAACAA[C/T]TTCTTCTGGAATATGTTCTTCATCCCATGGAGAAA
Y	AX-123357061	Affx-88811734	AX-89779956	Affx-88811734	A	G	SNP	1	4547656	1	3581488	ACATAGTAAGATAGACCATTGTCAAGCCTCCCATA[A/G]TCAACCCCAACAGGCTTGTCTCCCAGAACTTGGTC
N	AX-166518995	Affx-88811735	AX-89862698	Affx-88811735	G	GGAGT	Indel	1	4548316	1	3582149	GTAGGAGTGGGTTTGTGGGGAGAGGAGAAGGGAAG[-/GAGT]GAGTTTGATAGAGACCCTGAGTTTGCTGAAATAAT
Y	AX-166510838	Affx-88811736	AX-89818073	Affx-88811736	T	C	SNP	1	4548583	1	3582415	ACAAGATATTGCATACAAAATCTGGTTCAGGGGAA[C/T]CCATGAGAGTTGTATTCAATGAGTAAGTTTAAGAA
N	AX-166520259	Affx-88811736	AX-89818073	Affx-88811736	T	C	SNP	1	4548583	1	3582415	ACAAGATATTGCATACAAAATCTGGTTCAGGGGAA[C/T]CCATGAGAGTTGTATTCAATGAGTAAGTTTAAGAA
Y	AX-123357062	Affx-88811739	AX-89779958	Affx-88811739	A	G	SNP	1	4551316	1	3585148	TGCATTGCGAACAGAATCTAATTTCTGAAGGCGTA[A/G]CACATCAACACAAGTGCGTACATGTTGGAAGTAGT
N	AX-166510839	Affx-88811741	AX-89818074	Affx-88811741	T	C	SNP	1	4552187	1	3586019	CTGAGTTGAGAAGGTCTGAAGGAACTCCTCTTTAC[C/T]GGCAACAAGGGTCTCACCAAATATTTTCTGAAGAA
Y	AX-166510841	Affx-88811742	AX-89818076	Affx-88811742	T	C	SNP	1	4572953	1	3606531	TGGATCGTCATCCAAAAGTCTTGGAGTCGATCCTC[C/T]ACGCAACCTCCACCCTAGGTCCATATCAATTGCGC
N	AX-166518996	Affx-88811745	AX-89862699	Affx-88811745	C	CACGT	Indel	1	4582767	1	3616352	GATACAATTCATCACTCTGCAATAGTCCCTTTGAC[-/ACGT]ACCTTCTTCGTGTTGTGCTCCATTACTTTCTCTCA
N	AX-89779963	Affx-88811749	AX-89779963	Affx-88811749	T	C	SNP	1	4586625	1	3620209	AACCCCCATAGCTTGGTTGATTCAGTAGTATTATT[C/T]ACAGTAACCGCCATAACCAGTGATGCAATTGAGCC
N	AX-123360142	Affx-88811750	AX-89818077	Affx-88811750	T	G	SNP	1	4587384	NA	3620968	CTGTAGCAAATGACCTTGAAGGTTGCTTCATCAAC[G/T]GCAAGCATGCAGCCAAAAGACTGAACAAGAGCGCC
Y	AX-123357065	Affx-88811751	AX-89779964	Affx-88811751	A	C	SNP	1	4587518	1	3621102	GGTTGATGTTGTATAGTTGAAGGACTTACCAGACA[A/C]TGTGGACTGTTCAAACTCGTTTAGAAGACCAGCGT
Y	AX-166520260	Affx-88811758	AX-89875213	Affx-88811758	T	C	SNP	1	4598972	1	3632559	ACCTTCTGAACCATGCCCCTTTCAGTATGCTTTAA[C/T]TTGATGCTATGATCGGTACCAGATTCACTACACCT
N	AX-166502911	Affx-88811760	AX-89779968	Affx-88811760	A	G	SNP	1	4599547	1	3633134	ATTTGCAAAGGGAATTATACCACAGCTCAAACCTA[A/G]CAAAAAGGACATGTCCAGTTCACAGTGTGTGTACT
Y	AX-166502912	Affx-88811761	AX-89779969	Affx-88811761	T	C	SNP	1	4599794	1	3633381	GGACGTAGAATCCTTCCAGCATCAGAAAATATGCG[C/T]ACTTCTCCTTTGTGTTCGTCTCTTTTGATTTCCAC
Y	AX-166502913	Affx-88811768	AX-89779971	Affx-88811768	A	G	SNP	1	4602675	1	3636262	AGTTGCTCTGTTCCAGTTTTAAACTTGTCACTTTC[A/G]ACAAGATTTTGAGTATATACCTGGTAGATCAGATA
N	AX-166502914	Affx-88811773	AX-89779975	Affx-88811773	T	C	SNP	1	4615755	1	3650648	TTTGAAGTCTCTACACGTGAAGACCTCTTAGATTC[C/T]GGTATTGGTTTAGGAGCTGCTTGTTCTACTGGTCT
Y	AX-166510842	Affx-88811774	AX-89818081	Affx-88811774	A	G	SNP	1	4616615	1	3651508	CCGTTTATATGATGGAAGACTATAACCCTTGTTCC[A/G]GAGGCCACCTTTCAAGACCCCAAAGGCCAACAACT
N	AX-166520261	Affx-88811778	AX-89818083	Affx-88811778	T	C	SNP	1	4618807	1	3653700	GGGCGCAGTTCAACAGCTGCAGAGACAAACTCCTT[C/T]CCATATTTTGCTGTGAAATGCTTGCGGATATCCAT
Y	AX-123357066	Affx-88811782	AX-89779981	Affx-88811782	T	C	SNP	1	4624612	1	3659509	GTACCATGGTAGTGGAAGAAGGGTTACTAATGGAT[C/T]AGAACAAAGGTACAATGGGAATGGAAGAAGGTTCA
N	AX-123614513	Affx-88811788	AX-89806480	Affx-88811788	T	TGTC	Indel	1	4636653	1	3671459	ACTCTTGTTCAAAATATGCAGCAAGCTAGATCAAT[-/GTC]GACAGTATCAATAACATGTGATATCTCTAAACTTA
Y	AX-166502915	Affx-88811789	AX-89779984	Affx-88811789	A	C	SNP	1	4642815	1	3677623	GAACCTGGAGATATATTTAGCTTCACCTCATACAT[A/C]ATAGAATTCCAAATAGCCAGTTCACCTTCCCTTGT
N	AX-166502916	Affx-88811790	AX-89779985	Affx-88811790	T	C	SNP	1	4643783	1	3678591	AAAGCATCACCAGGATTAGCTAGAATGAAAGTCAA[C/T]AGCTCATTGGCTGCGGTTGCACCAGCGGTGAGGAC
N	AX-166520262	Affx-88811791	AX-89818091	Affx-88811791	T	C	SNP	1	4644975	1	3679783	CCACCAGTTCCTCTTGCAACATAAGTTTGGTTTCT[C/T]TTTTGGAGATGCATCTTTTAGTATTTGCAATTGTG
N	AX-166519460	Affx-88811792	AX-89867510	Affx-88811792	T	C	SNP-in-Insertion	1	4647215	1	3682024	CGTACACAAATATATGCTTTTGTGTATGTTTTCCC[C/T]ATAGTATGTGATCTACCATCGTCCACATAGACTAT
N	AX-166527406	Affx-88811793	AX-89904259	Affx-88811793	T	C	SNP-SNP	1	4647981	1	3682790	ACACACATTAACACGGGTAATTCATAACATGTGTG[C/T]ATATATACACTCCACCTCCCTCCCAAGTCCCAACC
N	AX-166502917	Affx-88811796	AX-89779987	Affx-88811796	A	C	SNP	1	4653984	1	3688794	TGGGGGTCTGGATCGATGTAACAATGCCTGAGATA[A/C]TGATCTGCTTCCTCACACACCAGTTGTCTAGCCCA
N	AX-166510845	Affx-88811799	AX-89818093	Affx-88811799	T	C	SNP	1	4654440	1	3689250	TAATGTAAGTATAGGGTGTCTTGCCATCCAAGGAA[C/T]CTGCAGTTATAGAAGGCACACCGGTCCGCTGTCAC
N	AX-166520263	Affx-88811802	AX-89875228	Affx-88811802	A	G	SNP	1	4656467	1	3691277	TTATTTATCAGAATAAGTTTCTATTCAAGGACAAA[A/G]TTGTTCTTGATGTCGGAGCTGGGACTGGAATTTTG
N	AX-166510846	Affx-88811805	AX-89818095	Affx-88811805	T	C	SNP	1	4659317	1	3694128	TTGTTTGCATGCTTCTTTAGTGTGTCCTTGGTCTT[C/T]ACAATTCCATGGGTGATCTTCTGTTTAAGATCACT
N	AX-166510847	Affx-88811806	AX-89818096	Affx-88811806	T	G	SNP	1	4659719	1	3694530	CCATAGATTTTAATATCTTTTCCATTTCAGCCTCT[G/T]TCGATGACTTGGGCACAAAAACTTCTCCAGGAGTC
Y	AX-166520264	Affx-88811806	AX-89818096	Affx-88811806	T	G	SNP	1	4659719	1	3694530	CCATAGATTTTAATATCTTTTCCATTTCAGCCTCT[G/T]TCGATGACTTGGGCACAAAAACTTCTCCAGGAGTC
N	AX-89818098	Affx-88811807	AX-89818098	Affx-88811807	A	G	SNP	1	4660683	1	3695494	GCTTCCGCCTTCTTCAAATTGCAAACATTCTCCGT[A/G]ATCTCAATGATCTGATACTCCGAGATCTACCTCCA
N	AX-166510848	Affx-88811809	AX-89818099	Affx-88811809	A	G	SNP	1	4666883	NA	3701697	AAAACGAATCTGGATGCAGATTTATACTTAGGGGA[A/G]CAGTCACAGTTTGATCAAACCACTCCGGAATTTCA
Y	AX-123360144	Affx-88811811	AX-89818101	Affx-88811811	T	C	SNP	1	4678534	1	3713371	CATTGGTGTGGTTAATCCATGTACCGAAAAGGAGA[C/T]AGCTGCCCTTGGGGATGCCAACATGCGAAATCTTA
N	AX-123614277	Affx-88811813	AX-89803264	Affx-88811813	G	GAGAGC	Indel	1	4682338	1	3717176	CCCATTGGATCAGTAAAAGTTGAGATGGGAAAGAG[-/AGAGC]CTAAGTTTTGGCCTACGTGTGAACTGTGGGTTTCC
N	AX-166510850	Affx-88811814	AX-89818104	Affx-88811814	T	C	SNP	1	4682552	1	3717389	CACGATGTTGTATTTCTACGTCTTCCTTTGATATA[C/T]GTTCAACGATTTCCCTAATAATACTGGATTCAGAG
N	AX-123357069	Affx-88811816	AX-89779992	Affx-88811816	A	C	SNP	1	4694764	1	3729582	CAGTCAAATCAAAGGGATCCTCACCGAAAGCTCTT[A/C]TAAGTAAGTAGCTCTTTTTAGTTTTTAATTCCCTT
N	AX-166510852	Affx-88811819	AX-89818106	Affx-88811819	A	C	SNP	1	4703096	NA	NA	CAATGAAGCTTTCAACCTCATCAAATTTCCCAGCA[A/C]TACCAAGAATATCAACCATACAGGCATAATGCTCA
N	AX-123357070	Affx-88811821	AX-89779995	Affx-88811821	A	G	SNP	1	4707640	NA	3742462	CGTCCCACCTACCTTTATTTGCATAGATATTTGAC[A/G]GCAATATATAAGTCGAACCCATCTCAGGTTCAAGC
N	AX-166502921	Affx-88811826	AX-89779997	Affx-88811826	A	G	SNP	1	4709266	1	3744088	GAGCATACCCATTTAGCAAGGCATTCCATGATACA[A/G]CATTCTGCTCAGGCATACAAAATAACACTTTATTG
N	AX-166502922	Affx-88811827	AX-89779998	Affx-88811827	A	C	SNP	1	4709336	1	3744158	GGCAAGTTCCAGCTGACCACATTTTGCATAAAGAT[A/C]AACGAGAGCAGACCCAACAAAATCATCCGAGAAGA
Y	AX-123363512	Affx-88811832	AX-89847072	Affx-88811832	T	G	SNP-SNP	1	4715572	1	3750393	CCCAGAATGCCAAACAGCTTCATACAACAATGAGC[G/T]CCAAAACCCAATAATTTAAGCAACAGAAACTTCAC
N	AX-123357071	Affx-88811833	AX-89779999	Affx-88811833	A	C	SNP	1	4717644	1	3752467	AAGACTACTGAGGACATTAAAGAGTGCCTCAAAAG[A/C]ACTCCAATGCATCCACTAGTAGTTGCAGCTATTAA
Y	AX-166510854	Affx-88811834	AX-89818113	Affx-88811834	A	G	SNP	1	4718587	1	3753410	TTTAGCTTCGGCTTCTGAAAATGGGAGGAAGAGAT[A/G]CATCTACCTTGGAGATGGGAGAAACGATTTTTGCC
Y	AX-123357072	Affx-88811839	AX-89780000	Affx-88811839	T	C	SNP	1	4728961	1	3765647	ATGGTGGTTTTGAATTGGATGTGCTAAATGCTGAT[C/T]CTGCCCTTTGCAGCAGTTGTTTGGCATCAGGGGGA
N	AX-166502923	Affx-88811841	AX-89780003	Affx-88811841	T	C	SNP	1	4735001	1	3771684	GCATTATGGCAATCACCACAGATACGAAGGTTCTT[C/T]ATAATCCGTAGAGTTTGCCTAGCAGGTGTACTGAT
Y	AX-166502925	Affx-88811846	AX-89780007	Affx-88811846	T	C	SNP	1	4744371	1	3781058	TCGTTGAATTGGTTCTGTTCTACAAGGAGAGCCAT[C/T]GGCCAAGATGAATCCACAGATCGATGTAGAGCTCT
Y	AX-123365063	Affx-88811847	AX-89875249	Affx-88811847	T	G	SNP	1	4745600	1	3782287	CAAATGAGCCCCTGTCCGGCCATACTGCTGAAGCC[G/T]GGTCCTCACACTATCAGCTTGTCCAAGATAAACCG
N	AX-89780010	Affx-88811852	AX-89780010	Affx-88811852	T	C	SNP	1	4750325	1	3787012	AGTTCATATTGCCAGCCCTGGATGGCAGATTATCT[C/T]AGTCCTGATGGCGAATTTTCTAGATATGGGGCTGG
Y	AX-123524234	Affx-88811859	AX-89818121	Affx-88811859	A	G	SNP	1	4764697	1	3801387	TGATTCCAAAGGAATTGAACATCTATCAACATCCC[A/G]ATGCTTGCAAGAAAAAGAGCAGCAAACATATTGCG
N	AX-123357074	Affx-88811860	AX-89780015	Affx-88811860	T	C	SNP	1	4765271	1	3801961	AGGAACCCAGTTCAAGACTTAAACCCAGCTTATCA[C/T]TACACTGAAATGAGATAAGAAGACATGTATTAATT
N	AX-123357075	Affx-88811865	AX-89780019	Affx-88811865	A	G	SNP	1	4769097	1	3805787	GCGGCTGCGAATTTCAGCCGAGGAATACTGAAGAA[A/G]AAGAGACAGAGCAGAGCGAGGAGTCGGAGCCTCAT
Y	AX-166502926	Affx-88811872	AX-89780023	Affx-88811872	A	G	SNP	1	4779122	1	3815816	GTTTGGCTGATTCTGATACTTGTCCTAAGCTCACT[A/G]AGAATTACATCACTGCTGATCAGTTCTTTACTGCT
N	AX-166510118	Affx-88811873	AX-89811076	Affx-88811873	A	G	SNP-in-Insertion	1	4779309	1	3816003	TTACCTTTCTAAAATAAGATGATAACTTGAAAGTA[A/G]TGGTGTTCTTTAGAAGATCAAAAGGGGTGTCTTTT
N	AX-166502927	Affx-88811874	AX-89780024	Affx-88811874	A	G	SNP	1	4779586	1	3816280	TTACACTGATTGTAGAAAAGAAGTTGATAGAAGAT[A/G]AAAGATTCTTCGTTTGGTACATCCAAACAAGTCGC
N	AX-123365064	Affx-88811881	AX-89875253	Affx-88811881	T	G	SNP	1	4792710	NA	3829409	CAAGGTCCTCCATAAAACTTTGGCTTCATAAGAGG[G/T]ACTTGATGGCCAGGATGATCTTCCCAGTATTTTTC
Y	AX-166502928	Affx-88811888	AX-89780032	Affx-88811888	A	C	SNP	1	4801900	1	3838604	CAAGAGCTTCCTGAATGTTCTTTGAAACCTCACCA[A/C]AGGCTTCAGGGATTGCTTGAAACACAGCAACAAGT
N	AX-123420131	Affx-88811893	AX-89818124	Affx-88811893	A	C	SNP	1	4807118	1	3843822	TGATCCGGGTCCTCAAAATACAATGTCATAAAATA[A/C]GGAATCTCACTACTAGGCAAATCAAAGTACCCTAA
N	AX-166518630	Affx-88811895	AX-89860608	Affx-88811895	C	CATTGT	Indel	1	4809387	1	3846092	TTTCGGAACTGGGACTCGGCTTGGGCCTTGCAGGC[-/ATTGT]ATGTGATGCTTTATGAGATCAGGGTTCTAGCTGAG
N	AX-166517601	Affx-88811898	AX-89847074	Affx-88811898	T	G	SNP-SNP	1	4811535	1	3848241	GAAATGGACATTGATGTGGATGAGGTACTTGCTTC[G/T]CTGCTCCTTCCATTCTTGTTTTGTTTCCAGCTTCT
N	AX-166510855	Affx-88811900	AX-89818126	Affx-88811900	T	C	SNP	1	4812709	1	3849415	ATCATGCCAGGAATTTGTGAATGCCAATGAAGTTC[C/T]TTCAAGTCTTTTTGTCCCTGTTACAATAAAATAAC
N	AX-166502929	Affx-88811904	AX-89780036	Affx-88811904	A	G	SNP	1	4815520	1	3852228	GTGAGAGGTTACCTTAGACAAGGCCAACCAATATG[A/G]AAGGCGTGGAGAGAGTCGTAAGCAGTAGGGTCACA
Y	AX-166502930	Affx-88811906	AX-89780038	Affx-88811906	A	C	SNP	1	4833053	5	21460393	CCCACTGTTTTGAAAGTAGTCAATATGAGTTCTTT[A/C]TGCTCGGGAGCAACTCTTGCATAAACCTAACACAA
N	AX-123366828	Affx-88811910	AX-89904264	Affx-88811910	T	G	SNP-SNP	1	4836564	5	21456875	CCAACACAATGGCCACTTTCATATTGCAAATCTAA[G/T]GAGTAGCTAACTCTCATATATCCTAATCCAGACTT
Y	AX-166502931	Affx-88811916	AX-89780043	Affx-88811916	T	G	SNP	1	4842453	5	21450980	CTGAAATCAAAGTAAATCTCCTCCATATCCACTGA[G/T]GACGAAGAACCTCCGGGCTGAAAAAATTTATGGGC
N	AX-166502932	Affx-88811917	AX-89780044	Affx-88811917	A	C	SNP	1	4843491	5	21449940	GATGCATACCTTGGAATAGTGTACAAAGCAATTGA[A/C]GTCGACAGACCAAGCAGTGAAAAGCCAAACGAGAA
Y	AX-123360148	Affx-88811924	AX-89818133	Affx-88811924	A	G	SNP	1	4879836	5	21410050	AAATGGTGATGTTAATGTACGGGTGCCGATTGACC[A/G]AGGAAGCGAGGAAGCATTTGACATTCACATTTTGC
Y	AX-89818134	Affx-88811925	AX-89818134	Affx-88811925	A	G	SNP	1	4879931	5	21409955	TGTTAGAATCCGATGCCAAGCTCAATGGAGATGAA[A/G]CAACCAGTAGTATAATAGACTCTTACTTTGGGTTT
Y	AX-166510856	Affx-88811926	AX-89818135	Affx-88811926	T	G	SNP	1	4880044	5	21409842	GAATCGATTATAAAGATGGGCCAGATTGGTATCAA[G/T]ACAAGTTTGCAAGGTGGGGTTAGACGAATTTGTTC
Y	AX-166502933	Affx-88811931	AX-89780046	Affx-88811931	A	G	SNP	1	4891621	5	21398267	AAAATGCACAAAAACACTCTGATAGGATATTGTGA[A/G]ATTGATCTACTTGAATTTCTAACCAGGGTAAGTCA
N	AX-166502934	Affx-88811935	AX-89780048	Affx-88811935	A	G	SNP	1	4894752	5	21395134	TTTGATCGGAGGACAAAGAGACTTGTGGAAGAATT[A/G]ATAGACGGAAAGATTGCCTTGTCAATGAGAGCTAT
Y	AX-166502935	Affx-88811937	AX-89780049	Affx-88811937	T	G	SNP	1	4901599	5	21388287	TGAGCGTCCCTTTTGTCTGCAAATCATGGCACGAA[G/T]CAACCCTCGATCCTCTGTGCTGGCAAAACCTCTCG
N	AX-166520267	Affx-88811939	AX-89818138	Affx-88811939	T	C	SNP	1	4902126	5	21387760	CAGATTGGGATTCACTGCAAGCATTTTGTAGGTCT[C/T]GGAATTGCTCATGCTTATAAACTAAACGCATCCAA
N	AX-89818138	Affx-88811939	AX-89818138	Affx-88811939	T	C	SNP	1	4902126	5	21387760	CAGATTGGGATTCACTGCAAGCATTTTGTAGGTCT[C/T]GGAATTGCTCATGCTTATAAACTAAACGCATCCAA
Y	AX-166510857	Affx-88811940	AX-89818139	Affx-88811940	A	C	SNP	1	4902161	5	21387725	CGGAATTGCTCATGCTTATAAACTAAACGCATCCA[A/C]TATTGTGGAATCATTGCCGAATCTCAAGTACTTGT
Y	AX-123357078	Affx-88811943	AX-89780052	Affx-88811943	T	G	SNP	1	4902404	5	21387482	AAGTGGAGATGAAGATGGTGAGGATTATTATAGTC[G/T]TGATGCTCAGATGCTGGCAAGGAAGTTGCTTTTAA
N	AX-89780053	Affx-88811944	AX-89780053	Affx-88811944	A	G	SNP	1	4904389	5	21385495	AAGAATCAAAATCATCCACTTTGGACTTTGATCCA[A/G]TTTGGGAAGATTGAAAATCATGAACAGCCATTTTT
N	AX-123357079	Affx-88811946	AX-89780055	Affx-88811946	A	C	SNP	1	4904822	5	21385062	TGAATCGAGACAATCACTGTCAGGAGAACTTGATA[A/C]CATAATCTCAATATCTTGATCTGCAACGTTGATCT
Y	AX-123524235	Affx-88811947	AX-89818141	Affx-88811947	A	G	SNP	1	4904890	5	21384994	TCTTGTCGGGAAACTCACCACTGATTGATGCTTCA[A/G]GTATTACTCTTGCTCCTTTGTTAACGAATGTTCCT
Y	AX-123360151	Affx-88811948	AX-89818142	Affx-88811948	A	C	SNP	1	4906609	5	21383275	ATTAACAATAACAACGTCATGTGCATTACCTCATG[A/C]TGTGCAGCTGCTGTCTTATCATCCACAACAAAATT
Y	AX-89875277	Affx-88811954	AX-89875277	Affx-88811954	A	G	SNP	1	4940467	5	21348531	TTGATGATATGATGAATCGCTTCTGCCGGTTTCTC[A/G]ATATCTTTGATTTCTTCGACTGGTTTCTTGATATC
N	AX-166502936	Affx-88811956	AX-89780058	Affx-88811956	T	C	SNP	1	4952847	5	21336140	CTATCTCTACATCTTTCTCACATGCACTTCTATCA[C/T]AGATTGTGACACTAAACTTTGATTCACCATCATAT
N	AX-166520268	Affx-88811957	AX-89818148	Affx-88811957	A	C	SNP	1	4953514	5	21335473	CGAATCTAGGCATGCAGGATTAGGGTCATACCAGA[A/C]GCTTAGAGAAGTCACCAATCAGCACCTTGAAAAAC
Y	AX-123363513	Affx-88811960	AX-89847076	Affx-88811960	A	G	SNP-SNP	1	4957991	5	21330995	TGATGTTAGAAAATGTGTAATTTTCCACTTCATGC[A/G]TTGCCGTGATTGAGAGAAATCAGAGAATGGTGGTT
Y	AX-123524238	Affx-88811962	AX-89818150	Affx-88811962	A	G	SNP	1	4970128	5	21318843	TGCCCTTATAATGCTGACTTGACAATATCAGTCGT[A/G]AGTCAGTCACAAGTCTAAGAGCATTATAAAATTCT
N	AX-89806483	Affx-88811967	AX-89806483	Affx-88811967	T	TTTA	Indel	1	4986660	5	21301800	CTCCTAAGTAAATATTTCTGACGTTTAAGTGGTAT[-/TTA]TTAGGAGACGGAAAATAATTTCGTCGCCTAAGTGA
Y	AX-166510858	Affx-88811974	AX-89818155	Affx-88811974	T	C	SNP	1	5001376	5	21287085	AAAGGATTCGACAAATGAATCATCAAGCCACCTTT[C/T]AGATATTGCATTTGGTATTAGAGAATGAAACCAGG
N	AX-89875287	Affx-88811974	AX-89818155	Affx-88811974	T	C	SNP	1	5001376	5	21287085	AAAGGATTCGACAAATGAATCATCAAGCCACCTTT[C/T]AGATATTGCATTTGGTATTAGAGAATGAAACCAGG
N	AX-89875290	Affx-88811979	AX-89875290	Affx-88811979	A	G	SNP	1	5029179	5	21259270	TTGTTGCCTATCGCTTCCTCTTCGCCACCGCTTTC[A/G]TCACTCCTCTTGCTCTTTACTTGGAAAGGTAACCC
N	AX-166518631	Affx-88811980	AX-89803274	Affx-88811980	C	CTTGA	Indel	1	5030045	5	21258400	CAATGACACAAAACATGCAATTTGAAAGCATAGCC[-/TTGA]CATCAGCGACATTTACTGCTGCTATAACTCAGCTG
N	AX-166510861	Affx-88811983	AX-89818159	Affx-88811983	T	C	SNP	1	5050862	5	21236862	TAGAAACAACATATTGTGGAATAACAAACAACAAA[C/T]TTCTCTTGAACTACAAACTGGAGCATTGGCATGGT
Y	AX-123360156	Affx-88811986	AX-89818162	Affx-88811986	T	C	SNP	1	5056367	5	21231349	CCACCACCAGCTGCCAGTCCTAGCATTGTTAACGC[C/T]AAGGCCTTAGGTAATAATATCTATAAAACTATCTA
Y	AX-166509136	Affx-88811987	AX-89803275	Affx-88811987	G	GCCA	Indel	1	5056497	5	21231216	ACCAGTTTCAAGGCTTTGAACATTGATGTAGAGGG[-/CCA]CATTTTGAACCTTCCTGGTGCAAATGGAGTAATTG
N	AX-166510862	Affx-88811990	AX-89818163	Affx-88811990	A	G	SNP	1	5061307	5	21226405	TACATTTCCATCAAAAGGCATGAACTCAATGAATC[A/G]AACGTTAATTGGCTTTTCACGTGTCAGCTCCACAA
N	AX-89818165	Affx-88811998	AX-89818165	Affx-88811998	A	C	SNP	1	5073646	5	21214320	ATCAAATCTACAGAACTCACCCTGCAGTGCAACAG[A/C]ATTGGCTTGAAGTCCAAACACTGAACCAATTCAGA
Y	AX-166509137	Affx-88811999	AX-89803276	Affx-88811999	A	AAAG	Indel	1	5074983	5	21212981	ACTATCCTATTACACATGAGAGCAAGAATTCTAAA[-/AAG]AAGAAACAGAGTGACAGAAGGAGAAGAATGTGCAT
Y	AX-89818167	Affx-88812001	AX-89818167	Affx-88812001	A	G	SNP	1	5076130	5	21211837	TATGTTCTATCCTCACTGGATTCAATGTAAGACTT[A/G]GAACAAGGATTCAATCTTCCGATAGCCTCACAGGA
Y	AX-166520270	Affx-88812003	AX-89818169	Affx-88812003	A	G	SNP	1	5076510	5	21211457	CAGGAGTATACCTTCTGTAGCGCAGGAAATTTGTG[A/G]GTAATCAATAACAGGTGAAATGTTCCACTTTCAAA
N	AX-89818169	Affx-88812003	AX-89818169	Affx-88812003	A	G	SNP	1	5076510	5	21211457	CAGGAGTATACCTTCTGTAGCGCAGGAAATTTGTG[A/G]GTAATCAATAACAGGTGAAATGTTCCACTTTCAAA
N	AX-123420196	Affx-88812004	AX-89780071	Affx-88812004	A	C	SNP	1	5076668	5	21211299	TGTTAAATTTGCCTTTGTTGCCAATGGTACAAAAT[A/C]AAAGATAGTTCGGGTCGAGAACAAATCATATTCAA
Y	AX-166520271	Affx-88812005	AX-89818170	Affx-88812005	A	G	SNP	1	5082385	5	21205591	ATCGTCAAGGGTTTTTCAAGGGAATACACTCTTGC[A/G]TTAGGGCGGATTTCTTCGTCTTGTTCCAGGTGAGA
N	AX-166510250	Affx-88812008	AX-89815281	Affx-88812008	T	C	Indel-SNP	1	5088087	5	21199879	CAGGTTGAGCAGTGATATATTTTTGAAGAAGAGCA[C/T]CAGATAATGACCTCACCATCTCTTAAAGCTTATAA
Y	AX-123524239	Affx-88812011	AX-89818172	Affx-88812011	A	G	SNP	1	5088940	5	21199026	AGCTCGTGGGAACCGTTGTGGGTATTGCTGGTGCT[A/G]TGGTCTTTACCTTCTACAAAGGACCAGAATTCTCA
Y	AX-123360158	Affx-88812012	AX-89818173	Affx-88812012	T	C	SNP	1	5089776	5	21198190	CAGCGTATTAGGAGGGACTTTAATTGTATGTGGGT[C/T]ATACATGGTGCTATGGGGAAAGAGCAAGGAGATGA
N	AX-166520272	Affx-88812013	AX-89818174	Affx-88812013	T	G	SNP	1	5095527	NA	NA	GTTCACTAGTGATCCAAATGCAAATCAAAAGACAT[G/T]TGGTGCTATGGTAGCATACCTTGAGGAGTTGAAAG
N	AX-89818174	Affx-88812013	AX-89818174	Affx-88812013	T	G	SNP	1	5095527	NA	NA	GTTCACTAGTGATCCAAATGCAAATCAAAAGACAT[G/T]TGGTGCTATGGTAGCATACCTTGAGGAGTTGAAAG
Y	AX-166502937	Affx-88812015	AX-89780072	Affx-88812015	A	G	SNP	1	5096872	5	21192240	AGTGACAAAAACAACAATGCTCAAGCTCCATCATC[A/G]GAAAACAAAGACTCAGGAAGTCTTTTGTTAGGCTC
Y	AX-166520274	Affx-88812016	AX-89818179	Affx-88812016	T	C	SNP	1	5112755	5	21174406	GATTTCGATCTTTAAGTGCAGATCGATGGCTTTCT[C/T]AAAGTATGATGAAGAAATTCAAGATTCGATTGTTT
N	AX-89875314	Affx-88812017	AX-89818180	Affx-88812017	T	C	SNP	1	5119498	5	21167756	GCTTGACGTTTTGGTGTATAAACATGAGAGGGCCA[C/T]TGTTTGTATCAAGTTTTAATCCTGTCATGCTCATA
N	AX-166520275	Affx-88812018	AX-89875315	Affx-88812018	A	G	SNP	1	5120647	5	21166599	AAAAGCAAATGCATCAGATGGTGCCGGCGGTGCAG[A/G]CGCATTTGCAGCAGCTCTTATAGATGGTTTCTTGT
N	AX-166510865	Affx-88812019	AX-89818181	Affx-88812019	T	C	SNP	1	5120906	5	21166340	CTTTTGTTGGTGAGGGCTGTAGAATACCTCCTGAG[C/T]GCTTAAGCCCTCCACCTTCAGTTGAGATCAGTGTT
N	AX-166510866	Affx-88812023	AX-89818183	Affx-88812023	T	C	SNP	1	5121306	5	21165940	GTGAGAGATTATGAGCATACACTTCTTGCATAAAC[C/T]CACCAGATTTTCATAGTAGAATGAGACCTCCGCCT
Y	AX-166527474	Affx-88812025	AX-89904266	Affx-88812025	C	G	SNP-SNP	1	5144394	5	21142903	GGTGGCTTTCTGCTTTTTCTGACCTGACCTCCTTT[C/G]CTTCGTCTTCCTCTTCTGCTGCTGCTCTGCTTGAT
Y	AX-123360159	Affx-88812028	AX-89818186	Affx-88812028	A	G	SNP	1	5150104	5	21137194	TAGAACACATAAACTTATCAAACTTGTGGAAGAGA[A/G]AGCCTGGCAGTGCACTCCAGCATCTGTTCTTTAAA
Y	AX-123524240	Affx-88812031	AX-89818187	Affx-88812031	A	G	SNP	1	5157373	1	2867330	GAAATTACAAACGATTCATGGGTATATTACCAGTC[A/G]TCATCACCCGAAAGATCAAATTCAAGATCATTGTC
N	AX-89818190	Affx-88812036	AX-89818190	Affx-88812036	T	C	SNP	1	5165806	NA	NA	CTTCGTTTTCGGCTACTCAGGCGACATGGATATAA[C/T]GTTTCCTGCGGTGGGTTAAGCAGTCAAGATTTCTA
Y	AX-123524241	Affx-88812037	AX-89818191	Affx-88812037	A	G	SNP	1	5166718	NA	NA	TTTGAACAACTTTCAGGTGGGATGCAAGTTGCATG[A/G]ATCAACTGCCAGACTATATGCAACCATTTTATATA
N	AX-166510867	Affx-88812039	AX-89818193	Affx-88812039	T	C	SNP	1	5167321	1	2857449	TTCGAATACCATATTTAGGCTTATGGATGACATTG[C/T]TGGGTACAAGGTATTCCTACGTTAAATCTGAGCAG
Y	AX-166520276	Affx-88812039	AX-89818193	Affx-88812039	T	C	SNP	1	5167321	1	2857449	TTCGAATACCATATTTAGGCTTATGGATGACATTG[C/T]TGGGTACAAGGTATTCCTACGTTAAATCTGAGCAG
N	AX-166502938	Affx-88812043	AX-89780077	Affx-88812043	T	G	SNP	1	5171123	1	2853647	GACGTCCTTATTCTCAAAGGCGGTTTTGGAATAGT[G/T]TGAGACGAAATCAGGGTCGGAAATTAGGGACTGCC
N	AX-166510868	Affx-88812045	AX-89818195	Affx-88812045	T	C	SNP	1	5172934	1	2851836	AGAGAAGTCACAGGTCCATATTTTCTGGTCATTCA[C/T]TTGGTAATACATGTTAAAAGCATAAGAAGCATTCC
N	AX-166520277	Affx-88812045	AX-89818195	Affx-88812045	T	C	SNP	1	5172934	1	2851836	AGAGAAGTCACAGGTCCATATTTTCTGGTCATTCA[C/T]TTGGTAATACATGTTAAAAGCATAAGAAGCATTCC
N	AX-166510869	Affx-88812046	AX-89818196	Affx-88812046	T	C	SNP	1	5173275	1	2851495	TAGCATTTTCATCAATGAGGCTGAAAAGATAGACA[C/T]CAATCATGCCTTTCCTAGCTGGAGTTCCATTCCCA
N	AX-166520278	Affx-88812046	AX-89818196	Affx-88812046	T	C	SNP	1	5173275	1	2851495	TAGCATTTTCATCAATGAGGCTGAAAAGATAGACA[C/T]CAATCATGCCTTTCCTAGCTGGAGTTCCATTCCCA
N	AX-123360163	Affx-88812047	AX-89818197	Affx-88812047	A	G	SNP	1	5173358	1	2851412	TTAAGCATTCCCTGATTAAACCTTTTGGCATTTGG[A/G]ATATTGGCATTTACAACCCCATCAGTTGGCCAACC
N	AX-166520279	Affx-88812047	AX-89818197	Affx-88812047	A	G	SNP	1	5173358	1	2851412	TTAAGCATTCCCTGATTAAACCTTTTGGCATTTGG[A/G]ATATTGGCATTTACAACCCCATCAGTTGGCCAACC
N	AX-166510870	Affx-88812048	AX-89818198	Affx-88812048	A	G	SNP	1	5173544	1	2851226	GGCTTGCTTTTTCCATCAAAGAAAGCAAATTCAAA[A/G]GGGAAGTAGGCATTTCCATACAGGCTGAGAAAAGG
Y	AX-166520280	Affx-88812048	AX-89818198	Affx-88812048	A	G	SNP	1	5173544	1	2851226	GGCTTGCTTTTTCCATCAAAGAAAGCAAATTCAAA[A/G]GGGAAGTAGGCATTTCCATACAGGCTGAGAAAAGG
Y	AX-123357081	Affx-88812052	AX-89780078	Affx-88812052	T	C	SNP	1	5173746	1	2851024	CAGCATTGAAGGGCACAGTGACTTTGACCTGTGAA[C/T]CAAGCCCGAAGCGGTTGAGAGCTTCCTGGATGTTC
Y	AX-166520281	Affx-88812053	AX-89875332	Affx-88812053	A	G	SNP	1	5174594	1	2850176	TGGTCAGCTTCAAAGAGCTTGAGCTTAGTAAACCC[A/G]TTTTCTTGAAGCATTTGAACCACTTTCTCAGGTGG
Y	AX-166502939	Affx-88812054	AX-89780079	Affx-88812054	A	G	SNP	1	5177936	1	2846830	ACAGCAGAAGCCGGGAGATTCATTATCACATGATC[A/G]ACATGCTCCCAAGTCTTAACATTGATGATCTCAGA
Y	AX-123357082	Affx-88812055	AX-89780080	Affx-88812055	A	G	SNP	1	5178667	1	2846099	GCAAAAGGGCCAATACCAGCGAACATATCACATAT[A/G]ACTTCCCCTGCTCGAAACTGAGAAACCAACCTTAT
N	AX-166520282	Affx-88812056	AX-89818201	Affx-88812056	A	C	SNP	1	5178825	1	2845941	AACTTTTTCTCCTGCTAAAACTTCAAATGTTGGCA[A/C]ACGAAATTCATTTGAAATAGATCCAACTTTATTGA
N	AX-123357083	Affx-88812063	AX-89780082	Affx-88812063	A	G	SNP	1	5192505	NA	NA	GATGATCTTAAGGCAATGCGGTATTCAGTTTTCAT[A/G]ACGCCAGTCAGCTGGATTTGGCCAAGTACAGAATC
N	AX-166527202	Affx-88812065	AX-89904268	Affx-88812065	A	G	SNP-SNP	1	5192832	1	2831966	TTAAAAGAAATATTGGGGTGAAGTCCAATACTTCG[A/G]AGGCAGATTCAATCTGTCTAATAGCAGAAGTACAA
N	AX-166502940	Affx-88812067	AX-89780084	Affx-88812067	A	C	SNP	1	5196670	1	2828127	AATACTCAACCTCAAACCAGTCCTAAAAGTTGTTC[A/C]TATCTTGTTGAATCAACCAACGGAAACCTATTGCT
Y	AX-123357084	Affx-88812068	AX-89780085	Affx-88812068	T	C	SNP	1	5196783	1	2828014	CTTCAAAGTTTCCCAAGTGGTAAAGAAACAATACT[C/T]TGGATCCATACTTGGTGTTGACGCACAACTACTTG
Y	AX-123360164	Affx-88812069	AX-89818202	Affx-88812069	T	C	SNP	1	5196817	1	2827980	TCTGGATCCATACTTGGTGTTGACGCACAACTACT[C/T]GAGGTGAATAGCATTGGAGATGAAGCTCTGCTCGT
N	AX-166518632	Affx-88812071	AX-89860614	Affx-88812071	G	GCAA	Indel	1	5198086	1	2826706	ATAGACTGAAGGTCCTACATCCGAAAATAAAATAG[-/CAA]CAACACTAACAACTCTACCACACCCGCAACCCATA
Y	AX-166510871	Affx-88812074	AX-89818204	Affx-88812074	T	C	SNP	1	5200663	1	2824132	GATGATAGTGCATGGAGTTGAGACATTGTCAAGTG[C/T]GTCTCTTTCGTCACTGTAAAAGACTATTTTTCCTA
Y	AX-166502941	Affx-88812076	AX-89780087	Affx-88812076	A	G	SNP	1	5201399	1	2823396	ACATAGACTGAGGATTTCAAGTTAAGTTCATCCAA[A/G]AGAGCAATCAAGTCATGAGCAAAATCATCGTAGCA
Y	AX-166520283	Affx-88812081	AX-89875339	Affx-88812081	A	G	SNP	1	5209153	1	2815638	TCAAATATACCAACTCTAGCACCCATACCAGCCAA[A/G]GTATATGCTAAGTTTACTGCAACAGTAGATTTTCC
Y	AX-123365066	Affx-88812082	AX-89818206	Affx-88812082	T	C	SNP	1	5209860	1	2814931	CCTTTACTGGACATGCTGGTGTAGTGAGCTCTAAC[C/T]GAAATGAAACCTGAGATGAAAAATCAATATATTCT
N	AX-166510872	Affx-88812085	AX-89818208	Affx-88812085	A	C	SNP	1	5213151	1	2811640	AAACTGAACCATGTTAGCAACTTCAACCTGAATTC[A/C]TCTGTAAGGTGACCCTCGCATTCCAGCCACCTGAT
N	AX-123555846	Affx-88812086	AX-89818209	Affx-88812086	A	G	SNP	1	5213496	1	2811295	AGAGTGCATCCATTATCTTCATCTCTGGATGACTC[A/G]AAGGGCGGGGTTAGCTCTTCATTCAGATCGGGCAT
Y	AX-123614279	Affx-88812092	AX-89803280	Affx-88812092	C	CCCA	Indel	1	5221532	1	2803253	AAACCTCAGAATGGGCCAATATATGATTCCATTTC[-/CCA]CTAGCCAATATTCATAGTCAACAAAGCACATAAAT
N	AX-123614833	Affx-88812097	AX-89860617	Affx-88812097	C	CCTT	Indel	1	5232046	1	2792726	AGAAAGTCGACAATATGGTGATTCTAAGAGAAGTC[-/CTT]CTCGCCCTGAAATTGTGAATGATTGGCGTCGAGAA
Y	AX-123357085	Affx-88812099	AX-89780097	Affx-88812099	A	G	SNP	1	5232666	1	2792112	ATCGTTTAAATTGCAGAGAACTGCATCTTCCAGTA[A/G]CTTGGGTTCCACCAACGGGAACCCAGTTGAAGTGA
N	AX-166520284	Affx-88812100	AX-89818213	Affx-88812100	A	C	SNP	1	5232714	1	2792064	CAACGGGAACCCAGTTGAAGTGAAACCGGAGACTT[A/C]TGTAAGTTTAATTGATTTTGATGCTGATATTGAAC
N	AX-89818214	Affx-88812101	AX-89818214	Affx-88812101	T	C	SNP	1	5233234	1	2791544	ATGCAGCATCAGCAACCTTCTTTATTCCCTTCTAA[C/T]GGCATTCAGTCTGCCTCTCAGCAATACATTCCATC
N	AX-89875345	Affx-88812101	AX-89818214	Affx-88812101	T	C	SNP	1	5233234	1	2791544	ATGCAGCATCAGCAACCTTCTTTATTCCCTTCTAA[C/T]GGCATTCAGTCTGCCTCTCAGCAATACATTCCATC
Y	AX-123360165	Affx-88812104	AX-89818216	Affx-88812104	T	C	SNP	1	5238923	1	2785854	TATTATTAGTACTGGTGTCTACATGGAGACCCTGC[C/T]TACCTCAACTCTATCGATCAAGAACAATATCTTTC
Y	AX-123360166	Affx-88812112	AX-89818219	Affx-88812112	T	C	SNP	1	5248815	1	2775955	CTGGTCAAGGTATAAAGAGTAAACGCGACCAGTTT[C/T]GAGTTTAGTAAATACGAGTTTCAATCTTTGGGTGA
N	AX-123357086	Affx-88812114	AX-89780099	Affx-88812114	A	G	SNP	1	5253011	1	2771759	TACCTTCTAATGGCAAACCAGCAGATAAATACTAT[A/G]TAGAGTCCCATGAGCCCTGGAGTCAAGATACCAGC
N	AX-166502943	Affx-88812116	AX-89780100	Affx-88812116	T	C	SNP	1	5259468	1	2765299	AGATTTGAATATGGTGGACGATGATGCAGAAAAGC[C/T]CAGTGATGTTTGGGAGGCGTGAAAATTATATGGCT
Y	AX-166520286	Affx-88812120	AX-89875352	Affx-88812120	T	C	SNP	1	5262593	1	2762174	AACTTGCCGGCGAAGCGGTTGTTACTGATGTCAAG[C/T]TCGTAAAGCAGCTTCAGGTTCCGGAATTTATGCGG
Y	AX-166517602	Affx-88812122	AX-89847081	Affx-88812122	A	C	SNP-SNP	1	5262932	1	2761835	CTCGGGTTCTCGAAAACCAGAGAAGGGTCTACTTT[A/C]ACGACCTCACCGCGGTCGCCGAACTCGTCGCGGTA
Y	AX-166510873	Affx-88812126	AX-89818224	Affx-88812126	A	C	SNP	1	5274087	1	2750736	TATAGCAAGATCAAATTTGTAGTCAGGATCTGTAG[A/C]CACTTCCAGTGCATCCTCCAACATCCCACGAGATT
Y	AX-123360167	Affx-88812127	AX-89818225	Affx-88812127	T	C	SNP	1	5274380	1	2750443	ATAACAAGTGTCTTGTACTCAATCAAGCTGAGAAG[C/T]AAGGAGTATCCCATGACACTGCATAAACAACAACA
N	AX-166520287	Affx-88812128	AX-89875355	Affx-88812128	A	G	SNP	1	5274948	1	2749875	GTTCGGACACGCTCGTTTATCTCAAAGAGGAGCTC[A/G]AAAGCATCTTCAACACCTAGTTCATCAACTGGCCT
N	AX-166502944	Affx-88812131	AX-89780104	Affx-88812131	T	C	SNP	1	5278612	1	2746211	TGGCAATTCAGAGACTTCAAATGACTTAGCCATAG[C/T]CTGTAATACAAAAGTTACATTTCAGTCAGGACTAC
Y	AX-166520288	Affx-88812135	AX-89818229	Affx-88812135	A	G	SNP	1	5283899	1	2741184	AGAGCATGCAGAATCACTTACAATGGCTATATTAT[A/G]TTTCTTATCAATTTCGAAAAAATAAGCAAGACAGC
N	AX-166518633	Affx-88812137	AX-89860619	Affx-88812137	T	TTTTG	Indel	1	5284613	1	2740466	CTTACACATCTAACAAAACTTATTTCAACCTAGCT[-/TTTG]ACATATAAATTGTTCATAATAAATATTTCAGTTTA
N	AX-166510874	Affx-88812138	AX-89818230	Affx-88812138	T	G	SNP	1	5285269	1	2739815	GCTTCCATCACATCAGCTTTGAGTTGGGAGCTAAA[G/T]GGTCTCGGTTCTGCGAAGCTCACCTTCGGCTGGTT
Y	AX-123363514	Affx-88812139	AX-89847082	Affx-88812139	T	G	SNP-SNP	1	5285390	1	2739694	GATGTTAGTTCAGAGTGGAGTAATATTCCACTGCC[G/T]AGAGTGTTTATATATAGGAATAATGGGAGTGAGTG
N	AX-89811604	Affx-88812141	AX-89811604	Affx-88812141	T	C	SNP-in-Insertion	1	5289876	1	2735208	TGATGAGATGATGGATAGTCCGGGGGAGTCGGAGA[C/T]GGATGATGATGAGAATGAGAATGAGAATGTGAGTG
N	AX-166502945	Affx-88812143	AX-89780106	Affx-88812143	T	C	SNP	1	5292501	1	2732583	ACAAACAAATTCATGGCAAAGCTGCAAGAAGAGCC[C/T]ATACCTCTTGCCTCGTCTAAAGAGGAGTTGCTGTG
N	AX-166520289	Affx-88812144	AX-89818231	Affx-88812144	T	G	SNP	1	5292570	1	2732514	TGGGCGCTGTAGCTGTTCGCAGGATCTGAGTAGTA[G/T]TTTCTATACCATTCGACCAACAAGTTTACAGACTC
Y	AX-166510875	Affx-88812147	AX-89818234	Affx-88812147	A	G	SNP	1	5293026	1	2732058	CATATTTTGAAGAGGCCTGCAATGGCCTTTTCAGC[A/G]AATGGAATAGGGGAGAACATGGGAAACTGAGCAAC
N	AX-166510876	Affx-88812150	AX-89818235	Affx-88812150	T	G	SNP	1	5294077	1	2731007	CTCTAGGAAGATCCTTTCCTCCATTGATTGCTCTA[G/T]TGTTCCTGATGAACTCGTCTTCTGTCATTTTCTTC
Y	AX-166520290	Affx-88812150	AX-89818235	Affx-88812150	T	G	SNP	1	5294077	1	2731007	CTCTAGGAAGATCCTTTCCTCCATTGATTGCTCTA[G/T]TGTTCCTGATGAACTCGTCTTCTGTCATTTTCTTC
N	AX-166518634	Affx-88812151	AX-89860620	Affx-88812151	C	CTCTT	Indel	1	5294598	1	2730482	TGAGTCTTACAAATTCCACCCAAGTTTCCAAATAC[-/TCTT]TAACCTGATCTTCCCAAAATGGAGTATACTCAGTA
N	AX-166510877	Affx-88812155	AX-89818237	Affx-88812155	A	G	SNP	1	5296626	1	2728458	AACTGTTAGCAGTGTCTTCAGCCATTCCTCATGGA[A/G]AGTTGAGAACTCTGATCTCTGTTCACTAGACTTGA
N	AX-123360168	Affx-88812156	AX-89818238	Affx-88812156	T	C	SNP	1	5297589	1	2727495	AAAGAATCTGGAGTTGCATGCTGAAGAACTGATGC[C/T]GTCTCTGTGCATTCCACAAAGAAGGTACCTGAGAA
Y	AX-123524243	Affx-88812156	AX-89818238	Affx-88812156	T	C	SNP	1	5297589	1	2727495	AAAGAATCTGGAGTTGCATGCTGAAGAACTGATGC[C/T]GTCTCTGTGCATTCCACAAAGAAGGTACCTGAGAA
Y	AX-166502946	Affx-88812157	AX-89780110	Affx-88812157	T	C	SNP	1	5298299	1	2726781	CGTGTAAAGATGATGTCCACAAGTGAGAGAACACA[C/T]ATCTCACAGGGCACGTAACAGCCCAGCTGCAAGCC
Y	AX-123357087	Affx-88812158	AX-89780111	Affx-88812158	A	G	SNP	1	5299369	1	2725711	TACAGCTGCTTCAAATTGCTTAAGATATAGATCAA[A/G]CCCATCACTGCCACTTAGACTTGGAACTTTAAATA
N	AX-166510878	Affx-88812162	AX-89818240	Affx-88812162	T	C	SNP	1	5303219	1	2721861	CCGGTGGCTCTGAGAAGCCTTATGTGAGTCATCGA[C/T]CTTCATAAACTTATGCATAATACTAGAGAAAGGCG
Y	AX-166520291	Affx-88812162	AX-89818240	Affx-88812162	T	C	SNP	1	5303219	1	2721861	CCGGTGGCTCTGAGAAGCCTTATGTGAGTCATCGA[C/T]CTTCATAAACTTATGCATAATACTAGAGAAAGGCG
Y	AX-166520292	Affx-88812164	AX-89818241	Affx-88812164	T	C	SNP	1	5305011	1	2719904	AAATTGTCCGAGCTTTTTCTCTTTGGGAGAGATAA[C/T]GTAGTCGTTGATAAATGGTTACATGAGTTGCCACA
Y	AX-166502947	Affx-88812165	AX-89780112	Affx-88812165	A	G	SNP	1	5305049	1	2719866	AGTCGTTGATAAATGGTTACATGAGTTGCCACATG[A/G]TAAGTTGACTTGTTTGGATTTGGGACACTGCAGGT
N	AX-89780114	Affx-88812170	AX-89780114	Affx-88812170	A	G	SNP	1	5319753	1	2705120	GACTATTAACATTAATTCTTTTGGTAAAGGATTCA[A/G]AGCCAGGGAGAGTTATAAATGGGAGTGACCACAGA
N	AX-166517604	Affx-88812172	AX-89847086	Affx-88812172	T	G	SNP-SNP	1	5328121	1	2696750	ACGATTAGCTAGCTTTGAATATTTATGTAAAGATT[G/T]AGACTACAAATATGGTTCAATTTTGAAATACAAGA
N	AX-166510879	Affx-88812173	AX-89818242	Affx-88812173	A	C	SNP	1	5335078	1	2689779	TGCTGTGGAGGAGGATTTGGGATTCTCCGGTTAAA[A/C]GATGATGGGTGTGCATTGGAATACTTGGCAGCTTT
N	AX-166520293	Affx-88812173	AX-89818242	Affx-88812173	A	C	SNP	1	5335078	1	2689779	TGCTGTGGAGGAGGATTTGGGATTCTCCGGTTAAA[A/C]GATGATGGGTGTGCATTGGAATACTTGGCAGCTTT
N	AX-166502948	Affx-88812175	AX-89780115	Affx-88812175	A	G	SNP	1	5336885	1	2687972	CGACTCCTTCCGCTTCGTAACTATAAACCTCAGCA[A/G]CCCCTCCGAGTCCATTTTTCTACACAGCGATTTCA
Y	AX-166510880	Affx-88812176	AX-89818243	Affx-88812176	A	G	SNP	1	5340412	1	2684445	CGATATCCATTCTCCCATCTTCTATGGATGCCTTC[A/G]CTCGGATATAGGAAATCAATCTCAACAACCTACCA
N	AX-166520294	Affx-88812176	AX-89818243	Affx-88812176	A	G	SNP	1	5340412	1	2684445	CGATATCCATTCTCCCATCTTCTATGGATGCCTTC[A/G]CTCGGATATAGGAAATCAATCTCAACAACCTACCA
N	AX-166520295	Affx-88812177	AX-89875374	Affx-88812177	T	C	SNP	1	5340606	1	2684251	TGCTACCTGCGGTAGTCATGGAGGTAACAGAGAAA[C/T]CTTCCTTCCATTTCTTATTAATCCATTTGAAAGGG
Y	AX-166510881	Affx-88812180	AX-89818245	Affx-88812180	A	G	SNP	1	5340926	1	2683931	CCTGCGCCAGCAAGTGAAGTGATATAGTAGTTCTT[A/G]TCCCACTGATCCATTATCCACTCCTGGAAAATAAT
N	AX-166520296	Affx-88812180	AX-89818245	Affx-88812180	A	G	SNP	1	5340926	1	2683931	CCTGCGCCAGCAAGTGAAGTGATATAGTAGTTCTT[A/G]TCCCACTGATCCATTATCCACTCCTGGAAAATAAT
Y	AX-123524244	Affx-88812182	AX-89818246	Affx-88812182	A	C	SNP	1	5342084	1	2682773	CGGACATGAGACACATAGCATCTCAGGAGAAGTTG[A/C]CATCTTCTTCTTGCAAACAAGAAATCCTTTGTTTT
N	AX-166502949	Affx-88812183	AX-89780118	Affx-88812183	A	G	SNP	1	5342343	1	2682514	TGTCCTGCCTAGATGAGCATGTACACTTGCATAAC[A/G]AACAGTTCCCCTATCAAAAGATCAGATACATCAGG
N	AX-166520297	Affx-88812184	AX-89818247	Affx-88812184	A	G	SNP	1	5343772	1	2681085	TTCCCCAGCTTTCTATCTAGCTTGTACAAGGGGGA[A/G]TTTCCAATCTGTACCTGGAGATGAAAATATTGAAT
N	AX-166520298	Affx-88812185	AX-89875379	Affx-88812185	T	C	SNP	1	5343958	1	2680899	GGACTACTGCTCCCTTCATCCTCAATAGCAGTCAA[C/T]TTTTGTGCACCTTTCTGATCTATCAATTCATCAGG
N	AX-166527156	Affx-88812190	AX-89904272	Affx-88812190	T	C	SNP-SNP	1	5359541	1	2665312	CTCTGAATCAAAAACATGAACTGTACAGTATATGT[C/T]TGGCTTTGTTTGTCAACCAAGATAGTCTAAATCAT
Y	AX-166502950	Affx-88812194	AX-89780119	Affx-88812194	A	G	SNP	1	5367033	1	2657817	TTGGGGCAGAGTTAATTTACAATTTGAAATTCAAC[A/G]GCCTATTGCAGATATGGAGATCGCATCCATGCATT
N	AX-166510882	Affx-88812206	AX-89818257	Affx-88812206	A	G	SNP	1	5387728	1	2637119	GAAGCTACCATAAAATTTGATATATGGGACACAGC[A/G]GGTCAGGAACGTTACCATAGCCTGGCTCCTATGTA
N	AX-166502953	Affx-88812213	AX-89780127	Affx-88812213	T	G	SNP	1	5437944	1	NA	TCCTTTTACAGATGCTATATTAGGTTGCTGGCCGA[G/T]CCAGCCATGGATGCGATAAACTCGTACTGTATATT
Y	AX-123365068	Affx-88812223	AX-89818264	Affx-88812223	T	G	SNP	1	5443265	1	NA	AAGATCAGAATCACAAAAGAGTACCATCATACGGA[G/T]TTGATTGCGTTCTTCTTCACTGAGTACAAACTGCA
N	AX-166510883	Affx-88812224	AX-89818265	Affx-88812224	T	C	SNP	1	5443322	1	NA	GAGTACAAACTGCAACTTCAAATGCAGAAACCCAC[C/T]TCCTTTGAGGGGAAAGAAGTCATCCCAAAGACCCT
N	AX-166520300	Affx-88812226	AX-89818267	Affx-88812226	A	G	SNP	1	5448733	1	3917469	AGTTTGTGGCACCTTTTCTTGAATGGAATAGTTTT[A/G]TTGTCTTTAAGTTTCACCTTACTCGTCTTGATCAT
N	AX-166502954	Affx-88812228	AX-89780133	Affx-88812228	A	G	SNP	1	5449666	1	3918402	AGCTGGAATTGAAAGTCTTGCGGTTCTCTATAGTA[A/G]TGATCAGATATTGGTCCTTGGACTTGAGCTGGACT
N	AX-89875393	Affx-88812231	AX-89818269	Affx-88812231	A	C	SNP	1	5466009	1	3934722	CTGTTTCTGGTTTCATGGCTCTCCTCTGCTTTGGC[A/C]TCTGTTGGTTATGACCACAGAGCTATTATAGTAAA
N	AX-166510884	Affx-88812233	AX-89818270	Affx-88812233	T	C	SNP	1	5466861	1	3935574	AAGGCAGAAAGGTTGTTCCAAACTCAAGGAGGTCC[C/T]ATAATTCTGTCACAGGTGAGAAAACTTGCTCAACT
N	AX-166520301	Affx-88812233	AX-89818270	Affx-88812233	T	C	SNP	1	5466861	1	3935574	AAGGCAGAAAGGTTGTTCCAAACTCAAGGAGGTCC[C/T]ATAATTCTGTCACAGGTGAGAAAACTTGCTCAACT
N	AX-89867516	Affx-88812236	AX-89867516	Affx-88812236	A	G	SNP-in-Insertion	1	5468226	1	3936940	AATTGGTTATTAACCTAACATGACCAGATCACCTT[A/G]CACAGTCTGTTACTTACCTAACATATGCTCTTGCC
N	AX-166510885	Affx-88812237	AX-89818271	Affx-88812237	T	C	SNP	1	5468521	1	3937234	TGTGATTCTCATAGTGGTGATCAAATACTTGTAGG[C/T]TCATGTATACCAGTCAAGATCTGGTTGTGCTGCAT
Y	AX-123357090	Affx-88812238	AX-89780136	Affx-88812238	T	C	SNP	1	5469123	1	3937836	GGTCCTAATGAACAATTTTTAAGAACTGGAAAGTA[C/T]CCCACTCTCAAAGTCGATTCAGCTGGGCATGCCTT
N	AX-166520302	Affx-88812243	AX-89875399	Affx-88812243	T	C	SNP	1	5470175	1	3938888	TTGGTTGTGTTTGAAGAATGGGGTGGTGATCCGAC[C/T]AAGATTTCTTTGGTAGCAAGAAGTTGAGTTTGTGA
N	AX-166520303	Affx-88812244	AX-89818274	Affx-88812244	A	G	SNP	1	5473056	1	3941769	GAGTTTAGAACAGATAATGAGCCTTTCAAGGCAGC[A/G]ATGAAAACATTTACAGAAAAAATTGTTGGTATGAT
N	AX-166510886	Affx-88812249	AX-89818276	Affx-88812249	T	G	SNP	1	5475886	1	3944599	CATGGTAGCTGTGGAAATTGCTCTTATGCTGGAAC[G/T]TACACTGAAAACAAATGCCGAACGAATTGTGGCCA
N	AX-166502955	Affx-88812251	AX-89780139	Affx-88812251	A	G	SNP	1	5476379	1	3945092	TAGGACTTGAATGACATTATCAACATCTTTCTGGA[A/G]CTCCAATACTACTCGTCCTTGATGCCTCCACTGCT
Y	AX-166510887	Affx-88812256	AX-89818278	Affx-88812256	T	C	SNP	1	5477989	1	3946703	CTCTCATGAAACTCTTTACTCAAACAAAGGAATGG[C/T]CTCCTCATGGCTACTTGCAAGATGTTTGAAACATC
N	AX-166520304	Affx-88812256	AX-89818278	Affx-88812256	T	C	SNP	1	5477989	1	3946703	CTCTCATGAAACTCTTTACTCAAACAAAGGAATGG[C/T]CTCCTCATGGCTACTTGCAAGATGTTTGAAACATC
N	AX-123366831	Affx-88812258	AX-89904276	Affx-88812258	T	C	SNP-SNP	1	5485736	1	3954450	TCTTTCAATTTGCTAGAATCACAGCCCAATTGCCA[C/T]CGAGTTGTTGGCTTGTTGCCTACTTTACCTGCCAC
Y	AX-166510888	Affx-88812264	AX-89818279	Affx-88812264	A	G	SNP	1	5495470	NA	NA	TGGAGCAGTTGTAGAGAGACAAGGGAAAATCTCCC[A/G]GGAGGTAGTTATCACCAAGGTCAAGGTGTGTGAGG
N	AX-89875407	Affx-88812265	AX-89875407	Affx-88812265	T	C	SNP	1	5498756	1	3967480	ATCCCAAACCACAAGAGCAGCAGAGAAAACATTGT[C/T]CCAGATGGCATTGCACCTGATGATTTCTCCCCCCA
N	AX-166502956	Affx-88812266	AX-89780143	Affx-88812266	T	C	SNP	1	5498837	1	3967561	TTTAACATGAAAAGTATTCCGAAAAATGTAGCAGG[C/T]AACATAAAGGCTGTCTTGAATGCAATCTTCTTCCA
N	AX-166510889	Affx-88812267	AX-89818280	Affx-88812267	T	C	SNP	1	5498978	NA	NA	AAAAGAACCATTGCTGTAATCAACCCACCTCTGTT[C/T]GAAGGTGAAAGGAAACCAAGCAAACCAAAGATGAT
N	AX-89875408	Affx-88812267	AX-89818280	Affx-88812267	T	C	SNP	1	5498978	NA	NA	AAAAGAACCATTGCTGTAATCAACCCACCTCTGTT[C/T]GAAGGTGAAAGGAAACCAAGCAAACCAAAGATGAT
N	AX-123357091	Affx-88812269	AX-89780144	Affx-88812269	T	C	SNP	1	5499260	1	3967985	AGCAGAGTCCACAATGAGTTGATCAAAGATAACAA[C/T]TGGATTTGATTACCACTGGAGAGGTACGAGTCCCA
Y	AX-123360173	Affx-88812279	AX-89818290	Affx-88812279	A	C	SNP	1	5513451	1	3982107	GCTGAGGAGTACCCTGCAAATATGCCCATGAATAT[A/C]CACAAAAGAGCCATTGGGATGTTCAACTCACCTTG
Y	AX-166520305	Affx-88812284	AX-89818293	Affx-88812284	A	C	SNP	1	5514330	1	3982986	CAGTCCCTGGATCTTCATGATACTTGACTTTAAAG[A/C]TCAGGTGGTTGTGAATGAATTGTCTTCCTTCATTG
Y	AX-166520306	Affx-88812285	AX-89818294	Affx-88812285	T	C	SNP	1	5514486	1	3983142	CTCCAGCATAATATGCCTTCAACCCAACCTGGAAT[C/T]CAGGCACATATATGTTTGATTGACCTCTTCCATCT
Y	AX-166510891	Affx-88812286	AX-89818295	Affx-88812286	T	C	SNP	1	5515064	1	3983720	GGAAGCTGTGTCTTGGCTGATGAAAGCTTATTAAC[C/T]TTAACTTCAAGTATATCTCCCTACAATTCAAAATC
N	AX-89818296	Affx-88812288	AX-89818296	Affx-88812288	A	G	SNP	1	5516573	1	3985233	GGCAGAAGCTGATTTTTCAATGTCCAGTTTGGTGA[A/G]GAAATAGAATATGGAGTATGCAAACATGTAAAGAG
N	AX-166510892	Affx-88812289	AX-89818297	Affx-88812289	T	C	SNP	1	5517679	1	3986339	TGCTACCTCAAAAGATACATCATATGTGAAAACAA[C/T]TTCTTCATTAGTATGAATCTCTTGTATGCTATAGC
N	AX-166502957	Affx-88812290	AX-89780146	Affx-88812290	A	G	SNP	1	5520078	1	3988738	GGGTCAGATGCATTCCAATGAAAATCAACAACTTT[A/G]TCCCTGCATAAAATGTGAAATACAGCAAAGCATGT
Y	AX-166510893	Affx-88812295	AX-89818299	Affx-88812295	A	G	SNP	1	5525979	1	3994641	TTGATTCTGGAGAGGTCTGGGCTTACCATTGAAGA[A/G]GAAGAAAAGTCGTCGAGGCTCTCTCTGGTCTTGGA
N	AX-166520307	Affx-88812295	AX-89818299	Affx-88812295	A	G	SNP	1	5525979	1	3994641	TTGATTCTGGAGAGGTCTGGGCTTACCATTGAAGA[A/G]GAAGAAAAGTCGTCGAGGCTCTCTCTGGTCTTGGA
N	AX-166502958	Affx-88812296	AX-89780149	Affx-88812296	A	G	SNP	1	5534411	1	4003697	TTGTTGTTGGTCGGATCAGGGAATGAGAATGTTGT[A/G]TATGTGTCATCGGGAAAGGAAGTCAAGAGCTTTGA
Y	AX-166502959	Affx-88812303	AX-89780151	Affx-88812303	T	G	SNP	1	5539607	1	4008848	CAAAAAAACATACCATGCAAATGAGATTCCACACT[G/T]CCATTAGGAATGAGCTCATAAACCAAGCAGCGGTG
N	AX-166520308	Affx-88812304	AX-89875431	Affx-88812304	A	G	SNP	1	5539823	1	4009064	TCACCACTGTAAACAAGCCCAAAGCCACCTTCTCC[A/G]AGTATTCTTGAAGGATCAAAATTGTCAGTGGCTTT
N	AX-166510894	Affx-88812305	AX-89818303	Affx-88812305	T	C	SNP	1	5540761	1	4010002	CCGAAACCAAGGGGAAAAAAGTGTAGAGAGGAACG[C/T]TAAGGCGCAGTCCAACTTGCATAGGCAATACACAG
N	AX-166520309	Affx-88812305	AX-89818303	Affx-88812305	T	C	SNP	1	5540761	1	4010002	CCGAAACCAAGGGGAAAAAAGTGTAGAGAGGAACG[C/T]TAAGGCGCAGTCCAACTTGCATAGGCAATACACAG
N	AX-123365069	Affx-88812314	AX-89875436	Affx-88812314	T	C	SNP	1	5549848	1	4019091	CTCAGAATATAAACCTGCTTATCTTTGTTTCCAAC[C/T]GGTGCAAGACCTATGAAGCGGGTGACATGCACAGC
Y	AX-166517605	Affx-88812315	AX-89847088	Affx-88812315	A	G	SNP-SNP	1	5550062	1	4019305	TAAAGAGTACATGATGCAATAATCTCCAAAATACC[A/G]TACCGTGGTTTGATCTCAGCAACTAACTCTGCCAC
Y	AX-166518636	Affx-88812318	AX-89860624	Affx-88812318	A	AGAG	Indel	1	5561628	1	4030865	GCTTAGAGATTCTTCAAATTCATACAAAAAAGATA[-/GAG]GAGAGCTCTTTTCTTGCTCCCGATGTGAATCTTCG
N	AX-166510895	Affx-88812321	AX-89818306	Affx-88812321	T	C	SNP	1	5563711	1	4032950	GTGAATTATTGAAGATCTTACTAGGTCAGGAAGGT[C/T]ACTGAAATAATCAGATTGATCTTGTTCTAGCTTTA
N	AX-89780158	Affx-88812325	AX-89780158	Affx-88812325	A	G	SNP	1	5565880	1	4035119	TAGTGTGTTGGATTACATTTCAGGTGTCAAGCTTA[A/G]TGATGCTTCAAAGAAGTTGGGGAAGAAATTTGCTA
N	AX-166502960	Affx-88812327	AX-89780159	Affx-88812327	A	G	SNP	1	5566062	1	4035301	ATCAAATTGATGTTCAAGGGGATATATTTTATGAT[A/G]TTGTGGAATTCATTACCGCCACATGGCCTGATGTA
N	AX-166517606	Affx-88812328	AX-89847089	Affx-88812328	A	G	SNP-SNP	1	5566228	1	4035467	AAAGTATGGTTATTATGTAGTCCAAGTGAGTGAAT[A/G]AGGATGCTAGTTTAGTTCTGTGATCTCAATAGGAT
N	AX-166502961	Affx-88812337	AX-89780160	Affx-88812337	A	G	SNP	1	5594368	1	4063141	CTGGTATCACACAGAGTTTGGTGGATGCTATACAT[A/G]AGAAGTGGAAGGTGGATGAAGTGGTCAAATTGAAG
N	AX-166502962	Affx-88812338	AX-89780161	Affx-88812338	A	C	SNP	1	5594713	1	4063486	CCAGAGTAAAACTGGAGGCTTGGTTATATGGAGAT[A/C]GGGCAGTTCAGTAGTGTTATACAGGGGAATATCAT
N	AX-166510896	Affx-88812342	AX-89818313	Affx-88812342	A	G	SNP	1	5596314	1	4065087	GGAGGCGAGAGGTTTACTCTGGTACGATAGAGAAT[A/G]TGCACTTGCACTGGAAGCATAGAGAGCTGGTGAAG
N	AX-166520310	Affx-88812342	AX-89818313	Affx-88812342	A	G	SNP	1	5596314	1	4065087	GGAGGCGAGAGGTTTACTCTGGTACGATAGAGAAT[A/G]TGCACTTGCACTGGAAGCATAGAGAGCTGGTGAAG
N	AX-166518998	Affx-88812347	AX-89862709	Affx-88812347	C	CATT	Indel	1	5601996	NA	NA	CTCGTAACCACATAAGCACAGGCACCAATCAAAAC[-/ATT]ATTGAACCATTTACCTTGGTTGAACTCATCTTCGG
Y	AX-166502963	Affx-88812348	AX-89780163	Affx-88812348	A	C	SNP	1	5603580	1	4072641	GCAATACTGTACAGTGTTTCTGAAAAGAAAGTCTA[A/C]AACAACTTTCGGTTCCATATTCCCAGAAATTATCT
Y	AX-166502964	Affx-88812349	AX-89780164	Affx-88812349	A	C	SNP	1	5604001	1	4073062	ATTGGATGATCACTGATGCTATATTCTATAAAGGG[A/C]GAGTCTATGCCATTGCAAACCGAGGCACGCGATCT
Y	AX-166502965	Affx-88812350	AX-89780165	Affx-88812350	A	C	SNP	1	5604248	1	4073309	GTGGGGGACGGAAAAATTTACTGTTTACAAGTTGA[A/C]TTTGAACAACAGAAGTGGATCTGTTGTGAGCCTAG
Y	AX-166510897	Affx-88812354	AX-89818314	Affx-88812354	T	G	SNP	1	5610169	NA	4079230	CCCAAAATTACACTTGCAACACGGCTTGTCCCTGA[G/T]AAGTGTTCAACTACAGAATGTAAGTCATCAGCTTC
N	AX-166510898	Affx-88812356	AX-89818315	Affx-88812356	T	C	SNP	1	5616151	1	4085213	TGCAGTGATGTCTTTATGAAGTCCACAACAACTGA[C/T]GCTAACTCGGCTTGATGTGAGCTGTAGTTATGGTT
Y	AX-166520311	Affx-88812356	AX-89818315	Affx-88812356	T	C	SNP	1	5616151	1	4085213	TGCAGTGATGTCTTTATGAAGTCCACAACAACTGA[C/T]GCTAACTCGGCTTGATGTGAGCTGTAGTTATGGTT
N	AX-89818316	Affx-88812357	AX-89818316	Affx-88812357	T	C	SNP	1	5616198	1	4085260	TTGATGTGAGCTGTAGTTATGGTTAGCTCCCTCTA[C/T]GATATGTAATTTGTGGTTAGGTATAATCTTCGCAA
Y	AX-166517607	Affx-88812358	AX-89847091	Affx-88812358	A	G	SNP-SNP	1	5616477	1	4085539	ATATCTGTACTTAGGCGATCCATCAAACTTTCGTC[A/G]GTCACACGATAACTTCCTGCAAGCATAATATCCAT
Y	AX-166520312	Affx-88812359	AX-89875448	Affx-88812359	A	C	SNP	1	5619376	1	4088439	GCTCTTTCTAGGTTTCCGACGGTCAGAAGGATGAG[A/C]AGCATTCTTCTTACGCTTTGGTGCTTTTGGGTTAG
N	AX-89875449	Affx-88812360	AX-89875449	Affx-88812360	A	G	SNP	1	5619407	1	4088470	TGAGCAGCATTCTTCTTACGCTTTGGTGCTTTTGG[A/G]TTAGGATCATGAGGAGACGAGTAGTCTATGTCCAT
Y	AX-166520313	Affx-88812369	AX-89875454	Affx-88812369	T	C	SNP	1	5627823	1	4096897	GCATGGCCACCCTCATGGAATGCCGTCAGCTTTCG[C/T]AGCTCTTCAGATTTAACTGCTGATTTGCGCTCGTT
Y	AX-123367755	Affx-88812374	AX-89847092	Affx-88812374	A	G	SNP-SNP	1	5635694	1	4104768	GAAACCGAATTTATCAAGTGGTGTACATCATACAC[A/G]GAATGTTCAAACTATTCATGCATTAGAGCATAACA
Y	AX-166510251	Affx-88812376	AX-89815286	Affx-88812376	T	G	Indel-SNP	1	5642257	1	4111329	ATGGGAGTAATGAATTGGAGGAAGCGACTGGAAAA[G/T]GGGGTGGGAATGTTGAATTCGGTGAGCCGGATGGT
N	AX-166502966	Affx-88812384	AX-89780171	Affx-88812384	A	G	SNP	1	5667616	1	4136695	ATAGGTGGGAGTTTGCAAATGAAGGGTTTCAAGGA[A/G]GGAAGAAGCACTTGCTGAAAAGCATCAAGAGAAGA
N	AX-166510899	Affx-88812386	AX-89818324	Affx-88812386	A	G	SNP	1	5668056	1	4137135	CAACCTCAAGTGTTTGCTGATCGATTGCCAGAAGC[A/G]GAACTTGCAACTCAACAGCAAGAAACCCCATTGCC
N	AX-166520314	Affx-88812394	AX-89875461	Affx-88812394	A	G	SNP	1	5680363	1	4149452	TTTAGGTGGAGAGGCACATTAGATTCTCCAGCGGG[A/G]GCTAAAGAGCTATGGTAATTATCTAAGCACTTGGT
Y	AX-89780177	Affx-88812398	AX-89780177	Affx-88812398	T	C	SNP	1	5686338	1	4160112	GCCAATTATGAGCCTGAAGGATGGAAATGCAAGTG[C/T]GGCTCTACTTTCTTCAATCCATAAATGTCTATGTT
N	AX-89818329	Affx-88812399	AX-89818329	Affx-88812399	T	C	SNP	1	5687540	1	4161319	CGCGAATGGAGCCTCGTGTTGGGAACAGGTTCAGA[C/T]TGGGACGGAAGATCGGAAGCGGCTCGTTTGGGGAG
Y	AX-123363517	Affx-88812401	AX-89847094	Affx-88812401	T	G	SNP-SNP	1	5690224	1	4164005	ACTTAAATGTACAAGCCTTTTCTTTTATTCCGTTT[G/T]CGGGGTCTCAAATGGGTGTGGAAATGCCTGATATC
Y	AX-166517608	Affx-88812403	AX-89847095	Affx-88812403	T	C	SNP-SNP	1	5692340	1	4166122	AAAGCCGAACGTGAGCAGCTAGCCCTACAAACCCA[C/T]CAACATGAAAATCTCTTCCATTCTCGTCCTTCCTC
Y	AX-166520315	Affx-88812406	AX-89818332	Affx-88812406	A	G	SNP	1	5697228	1	4171021	TGCAATCTAGTGGATTTTATTAGAAACACTTATCC[A/G]GAGACCGAGTGCACTGCATATGGCTATACTGCATT
N	AX-166510900	Affx-88812409	AX-89818334	Affx-88812409	T	C	SNP	1	5700233	1	4174027	AAGGGCACCTTGTAACTAGCATGTCCGAGAAGTTG[C/T]TGTGCGGTAATTGCATAGATTTGAGGGACATACTC
Y	AX-89818336	Affx-88812412	AX-89818336	Affx-88812412	T	C	SNP	1	5704922	1	4178716	CACCGCACATACCAGAGGTGAAAGAAGCAATAGAA[C/T]ATGCATAGCCACACATATAAGCATGGAAGAGAAAG
Y	AX-166502967	Affx-88812414	AX-89780182	Affx-88812414	A	G	SNP	1	5709037	1	4182832	ACTTGCTGTACATCAATACCACGAGCTAACAGATC[A/G]GTGGTGATCAAGACACGAGAGGACCCAGAACGGAA
N	AX-123614965	Affx-88812418	AX-89862712	Affx-88812418	C	CTACG	Indel	1	5715630	1	4189433	TGAAAGACCAACCAGGATCAGATATATTATACTCC[-/TACG]TACTTATGTATTACACTTTTACGAAATGACTTGTG
N	AX-166520316	Affx-88812421	AX-89818339	Affx-88812421	A	G	SNP	1	5716898	1	4190700	GATCCGGGTCCGTGATGTGGTTGTGAAAATGGCTG[A/G]GATTAATTTCTTGTGTGTGCATAAGAAGCTCAGGT
N	AX-123360180	Affx-88812426	AX-89818341	Affx-88812426	T	G	SNP	1	5721872	1	4196830	ATTTCCCATCTCTCTTTTGGCTTCGGATTTCTCTC[G/T]GTGAATTTGAAAGAGCTCTCTACGACTGCCGCGAC
Y	AX-123524249	Affx-88812426	AX-89818341	Affx-88812426	T	G	SNP	1	5721872	1	4196830	ATTTCCCATCTCTCTTTTGGCTTCGGATTTCTCTC[G/T]GTGAATTTGAAAGAGCTCTCTACGACTGCCGCGAC
N	AX-166510901	Affx-88812428	AX-89818342	Affx-88812428	A	G	SNP	1	5724111	1	4199070	GAGTCAGGAGTTTCATACCTTTGTTCAAGGGTGGA[A/G]AGTATTGTTGAAGGTAGCAATGGCCATAGCCTTAT
N	AX-166520317	Affx-88812428	AX-89818342	Affx-88812428	A	G	SNP	1	5724111	1	4199070	GAGTCAGGAGTTTCATACCTTTGTTCAAGGGTGGA[A/G]AGTATTGTTGAAGGTAGCAATGGCCATAGCCTTAT
Y	AX-166510902	Affx-88812430	AX-89818344	Affx-88812430	T	C	SNP	1	5724997	1	4199956	TGGTCTTGGATTCCAGTTGGGGGGTCATTACCGAA[C/T]ACAGAGCAAAAGAACTTGGCATTTGGTGCTGCTGC
N	AX-166510145	Affx-88812433	AX-89811605	Affx-88812433	A	C	SNP-in-Insertion	1	5730570	1	4205533	TGGGGTCTAGCAGTTCTAATTACATAACCAGGTAT[A/C]CTAGTGCTGAAGCATTGTCATTACTAATTGGTACG
N	AX-166519461	Affx-88812433	AX-89811605	Affx-88812433	A	C	SNP-in-Insertion	1	5730570	1	4205533	TGGGGTCTAGCAGTTCTAATTACATAACCAGGTAT[A/C]CTAGTGCTGAAGCATTGTCATTACTAATTGGTACG
Y	AX-166520318	Affx-88812436	AX-89818346	Affx-88812436	T	C	SNP	1	5732614	1	4207575	AGGTTCAGGATAATTTTTGAAGTAGCATGTGGGCT[C/T]GCATTCTTACACAACTCAAAGACAGACCCTATTGT
N	AX-166502968	Affx-88812437	AX-89780186	Affx-88812437	T	C	SNP	1	5732660	1	4207621	ACAACTCAAAGACAGACCCTATTGTGCATCGAGAT[C/T]TAAAACCCGGTAATATCTTACTAGACAGAAACTAC
N	AX-89875484	Affx-88812440	AX-89818348	Affx-88812440	A	G	SNP	1	5734283	1	4209244	GAAATGCTTGCCAGCTTCATCAAGGATTGCTTTCA[A/G]CTTAGACACATCCCGAATCTCGACACAAGTGTGCC
N	AX-166510903	Affx-88812443	AX-89818350	Affx-88812443	A	G	SNP	1	5742497	1	4217464	GAACGCAAAGAGACTGAATATATGCGTCTTAAGAG[A/G]CACAAGATTTGTGTTGAGGACTTCGACCTTCTCAC
N	AX-166527411	Affx-88812445	AX-89904277	Affx-88812445	A	T	SNP-SNP	1	5744189	1	4219156	TATCATGCATCAACGTAACTTTATGTAATTCTTAA[A/T]TTTTTTTTGTTTTCAGAGATATAAAACCAGACAAT
N	AX-123357094	Affx-88812453	AX-89780193	Affx-88812453	A	G	SNP	1	5755233	1	4230207	GGTCAAATCCAGAGACAAAGGCAAAAAATCTGATG[A/G]GATAGATGAGAAACCTGGACAGAACATTCAAATTC
N	AX-166509138	Affx-88812459	AX-89803295	Affx-88812459	C	CTCT	Indel	1	5758661	1	4233639	TCTTCTCTGTGTACATTCCTTTCTCTAAAGGTTAC[-/TCT]TCTTGTATCTGTTCTCATGTGCAGCTTCCATGAGC
N	AX-89803296	Affx-88812461	AX-89803296	Affx-88812461	T	TGAC	Indel	1	5759160	1	4234138	CCAGCATTGCCTTCTGTACCGAAGTCTGGTGAAAT[-/GAC]TACCAGTCGGAATCCCAAGCAAAAGGATCATCATC
N	AX-166520319	Affx-88812462	AX-89818354	Affx-88812462	A	G	SNP	1	5759327	1	4234304	AGGATTTAGGTTCATGGTTGAATATCGATGATGAT[A/G]GTTTACAAGATCATGATTTCATGGGTCTTGAAATT
N	AX-123357096	Affx-88812464	AX-89780197	Affx-88812464	T	G	SNP	1	5764338	1	4239319	AGGGTGAGATTTGCAGTGGATCCAATACTTCTGAT[G/T]CATCCACCATGGTGAATCGGGCGAAGAAAATATGC
Y	AX-123357097	Affx-88812471	AX-89780201	Affx-88812471	A	G	SNP	1	5774063	1	4249049	AAAAATGCAATTCCTTACTTGCAAGAGTAGTATAT[A/G]AGGATGTTTGAACAACTCGACCTGGGTTATAAGAC
N	AX-166510904	Affx-88812477	AX-89818357	Affx-88812477	T	C	SNP	1	5791167	1	4266210	GTAAAGAAGGAGATAGCCATGGTTTGGAACTCAGT[C/T]CTGTCCAATCAGAGAAAGAGAAAGAGGAAGCAGAA
Y	AX-89818359	Affx-88812483	AX-89818359	Affx-88812483	T	G	SNP	1	5795978	1	4270972	CCTACCAAGTCCTCCTCGACCATTAAGAAATGAGA[G/T]TCCCGCACTTTGTGGAGAGGCCCGTAAACCCTAAG
N	AX-89780210	Affx-88812490	AX-89780210	Affx-88812490	T	G	SNP	1	5799152	1	4274146	TCGAATAGCAGCTTTACGTACTGCAATGAACTCCT[G/T]GCGTGCCATATGGGTACGAATTTGCCTTTGTATGG
Y	AX-166510907	Affx-88812493	AX-89818367	Affx-88812493	A	G	SNP	1	5800702	1	4275696	TAGTGAGAGATGGTAAAACTAGTTCGAGAAAGCTT[A/G]GGTTTGATAAACCGCTTGTGGTTTTTGAATGTCTG
Y	AX-166520321	Affx-88812496	AX-89818370	Affx-88812496	T	C	SNP	1	5802232	1	4277231	CGTGGCAGCATATTCTTCACTATCATCTATTCCAT[C/T]GAGAACATAGCAACTAGATTGATTCAAGTAATGGT
N	AX-89818370	Affx-88812496	AX-89818370	Affx-88812496	T	C	SNP	1	5802232	1	4277231	CGTGGCAGCATATTCTTCACTATCATCTATTCCAT[C/T]GAGAACATAGCAACTAGATTGATTCAAGTAATGGT
N	AX-166510908	Affx-88812501	AX-89818373	Affx-88812501	T	C	SNP	1	5811524	NA	NA	ATTCCAGAAGCTATATCTGCTTTTGATTTGGTAAG[C/T]GAAGAGTTCCGTCAATTGCCATTGCCTCCTGCTTT
N	AX-166520322	Affx-88812502	AX-89818374	Affx-88812502	T	G	SNP	1	5811691	1	4286720	ACACAATGAGTATTGGGTGATGAAACAGTATGCGG[G/T]CCCTGAATCTTGGGTTAAAATGTTTCAATTTAGTG
Y	AX-89818374	Affx-88812502	AX-89818374	Affx-88812502	T	G	SNP	1	5811691	1	4286720	ACACAATGAGTATTGGGTGATGAAACAGTATGCGG[G/T]CCCTGAATCTTGGGTTAAAATGTTTCAATTTAGTG
N	AX-166510909	Affx-88812503	AX-89818375	Affx-88812503	T	C	SNP	1	5811892	1	4286921	ATGTAGTAGCCGGTATCAGATTAAGAGTGTGCATG[C/T]GAAAAAGGATATGTATCGGTCTGGTGTGATGGTTT
Y	AX-166520323	Affx-88812503	AX-89818375	Affx-88812503	T	C	SNP	1	5811892	1	4286921	ATGTAGTAGCCGGTATCAGATTAAGAGTGTGCATG[C/T]GAAAAAGGATATGTATCGGTCTGGTGTGATGGTTT
Y	AX-166510910	Affx-88812507	AX-89818376	Affx-88812507	T	C	SNP	1	5817510	1	4292543	AGAAAATACAAAGCCTGCCAGAGGGAGTATGCAAC[C/T]AGGGGCACCAAAAACAACCATGTCCACAGATAAGT
N	AX-166520324	Affx-88812509	AX-89818377	Affx-88812509	T	C	SNP	1	5818909	1	4294066	AAACTTACCAAGAGATAGTAATGCCATTTCTTGTA[C/T]CGATAGTATATCCACCGCAGAGGAACAAAGATGAA
N	AX-166510911	Affx-88812510	AX-89818378	Affx-88812510	A	C	SNP	1	5819336	1	4294492	ACTTTTCATGCTCTTCAGCTTGTTTAGCGATCTTC[A/C]CAGCCTGTTTTGATAGGATCTCCTTGGTCTGCTCC
Y	AX-89803298	Affx-88812511	AX-89803298	Affx-88812511	G	GACC	Indel	1	5821946	1	4296828	GCATGCTGCCTGCATACATATGAAGACAGACAGAG[-/ACC]AACAAATTAAGTTGGCGCGTCATTTTAAAATGTGA
Y	AX-166502970	Affx-88812512	AX-89780214	Affx-88812512	A	C	SNP	1	5824465	1	4299347	ATTTGATGAGAAATTGACTCACACATGCTCAGTGT[A/C]CGGTAGTAGGAGTGGACCACATCATTCGGCAAAGT
Y	AX-166502971	Affx-88812513	AX-89780215	Affx-88812513	A	G	SNP	1	5824994	1	4299876	GAACTCTATCAGAAATTTGATGAAGAAGAGAAGTC[A/G]GGTACTCCAGCTGTTTACAAGCCTGAACTTGAAGT
Y	AX-166502972	Affx-88812515	AX-89780216	Affx-88812515	T	C	SNP	1	5825925	1	4300806	CCAAAAAGCTCTTCTGGTTTTGGAAGTCCTTTGGA[C/T]ACACCTCTTGAAGATCCACTTGAATTGCCTTCCCT
N	AX-166502973	Affx-88812518	AX-89780219	Affx-88812518	A	G	SNP	1	5826877	1	4301758	ATCCTTGCGGCGCATCATGCAAACTCTTTGGACAT[A/G]ATTCGTGGAGGATCGAAAGGAGAGAGAAGGCGTGG
N	AX-166509632	Affx-88812524	AX-89806497	Affx-88812524	G	GCGGC	Indel	1	5828634	1	4303516	ATAGCAGTGGTGTAGAGGGTCACATCAATGGTTGG[-/CGGC]CGGTGGTGTTGGTGGTGTTAGGGGAGATAGGGTCA
N	AX-166520325	Affx-88812525	AX-89875513	Affx-88812525	A	G	SNP	1	5829351	1	4304232	GAGGGCCGTCCACACACAAGTAGTCACTGTGCCTC[A/G]AAGCATGGTCTTGCAACTTGGGAATCTTGTGCAAG
N	AX-166510912	Affx-88812528	AX-89818381	Affx-88812528	T	G	SNP	1	5831650	1	4306531	CCTGGCGTTCACCACTCATGGATACCACAGAAGTT[G/T]CACGTCTTGTCATTGTCCTCTCACCATTCGAAGAT
N	AX-166502974	Affx-88812529	AX-89780223	Affx-88812529	T	G	SNP	1	5841600	1	4316340	GCATCTTTAATAATTCCATGTTGAGAAGGAAATCC[G/T]TCACTTGCTCCATACCTGTGTATGTCATAACATTT
N	AX-89860628	Affx-88812531	AX-89860628	Affx-88812531	T	TGTG	Indel	1	5844036	1	4318777	TAGATCATTGCTTCCCGAGTGATGATTTTCTCTCT[-/GTG]GTGTATCCTTCTGATGGAAGTCGATAGAACCCGAG
N	AX-123357099	Affx-88812532	AX-89780224	Affx-88812532	T	C	SNP	1	5845527	1	4320267	AAGAAACGCATTGACCTTGAGATTGACCAATTGAC[C/T]GTGTTGTGCCTGATCCGGGGTCAGGTTGTACTTGA
N	AX-166510913	Affx-88812535	AX-89818382	Affx-88812535	T	C	SNP	1	5849070	1	4323810	TCAACACCATTAAGGCAATTTTCACCGTCATATAC[C/T]TCGTTTTCGGATTATGTATCTGCTCCCATTCCTTG
N	AX-166520326	Affx-88812535	AX-89818382	Affx-88812535	T	C	SNP	1	5849070	1	4323810	TCAACACCATTAAGGCAATTTTCACCGTCATATAC[C/T]TCGTTTTCGGATTATGTATCTGCTCCCATTCCTTG
N	AX-89780225	Affx-88812536	AX-89780225	Affx-88812536	T	C	SNP	1	5849370	1	4324110	AGAGCTGGTTTATGAACCATGAATCATATGTTAGG[C/T]GGTTCCATTGTTTCGAAACGAGCCTGCACCGGGCA
N	AX-123357100	Affx-88812537	AX-89780226	Affx-88812537	T	C	SNP	1	5851257	1	4326001	ACGAAACAATGGGTAAAGATACCGAATCCGAAAAC[C/T]AAGTACCCTACTGCAAGCACTGCCCTGCTGGTGTT
N	AX-123524250	Affx-88812538	AX-89818383	Affx-88812538	A	G	SNP	1	5854180	1	4328924	GCGCAACAAAATGAAGCAGATCCAAAATTGATCCA[A/G]CTGTGTAGATTTTGTAATCTGCAACGGCTTTGACA
Y	AX-166520327	Affx-88812539	AX-89875519	Affx-88812539	T	C	SNP	1	5855061	1	4329805	CCTTTTGGTAGCATAGACATAGTTGAATCCCATGT[C/T]CGGGTCATCCGCATCATATGTTGCAAGGTTTGGAG
N	AX-89780228	Affx-88812543	AX-89780228	Affx-88812543	A	G	SNP	1	5856736	1	4331480	TGAGCAAGAACAGAAGAAACCACCAGATCGAGCAT[A/G]TGACTCCGATGAGCCAGCAGCAATTCGAAACGCAC
N	AX-166502975	Affx-88812544	AX-89780229	Affx-88812544	A	G	SNP	1	5861379	1	4336127	TGTCTGCTTCCTCTTCTGTTACAGAGTTCGATACA[A/G]AGTTCAAAGATGGAATCTGTAGAAGATAGCCCTGT
N	AX-166520328	Affx-88812546	AX-89818386	Affx-88812546	A	G	SNP	1	5861525	1	4336273	CTCAGATTCACTTGATCATCATCCAATGCAGTCCA[A/G]ACAGTATTGTGATTCAGTTGGTGTGAATTCCACCC
N	AX-166509139	Affx-88812547	AX-89803299	Affx-88812547	T	TAAG	Indel	1	5861618	1	4336367	ACCAAGACAGAGACATCATCCATGGATGCTTCTAT[-/AAG]AAGTAGTTCATCAAGGGATGCTGATCGCTCTGGAG
Y	AX-123366832	Affx-88812554	AX-89904278	Affx-88812554	A	C	SNP-SNP	1	5885382	1	4360149	ATCACATTCCTAGATTTTCGAAGCTCTCTTTTGAT[A/C]GCAGAACTGATCTCTAGGGTCATTAGTGACCAAAA
N	AX-166520329	Affx-88812557	AX-89875525	Affx-88812557	A	G	SNP	1	5888319	1	4363086	TTTCGAGCTTAATCTACCTGTTGGGATTGGTAGAT[A/G]TACAGAAGAGCTTCCAGTTTATGAAACCACTAACT
N	AX-89875528	Affx-88812562	AX-89818389	Affx-88812562	A	G	SNP	1	5898573	1	4373345	GAGCTATGGAAGATGCTGACAGACTCCAACAACAA[A/G]TGCGTATATCTCTTCCCAAACGTTGCCCGGTGGAA
N	AX-166510914	Affx-88812564	AX-89818390	Affx-88812564	A	C	SNP	1	5901911	1	4376686	TAGCCACCTCTTTTCAGTCCACCAGGTTCTTTGAT[A/C]GGATTAAAGAATCGATATTTCATCAGTATGTTCTT
Y	AX-166520330	Affx-88812564	AX-89818390	Affx-88812564	A	C	SNP	1	5901911	1	4376686	TAGCCACCTCTTTTCAGTCCACCAGGTTCTTTGAT[A/C]GGATTAAAGAATCGATATTTCATCAGTATGTTCTT
N	AX-166502976	Affx-88812565	AX-89780234	Affx-88812565	A	G	SNP	1	5901941	1	4376716	TTGATCGGATTAAAGAATCGATATTTCATCAGTAT[A/G]TTCTTCGAAGCCTTTCGGGGCCTCCATTGGTGGAG
N	AX-166510915	Affx-88812566	AX-89818391	Affx-88812566	T	C	SNP	1	5902156	1	4376931	AAAATTTCTGCTTGGACGATGAAAGGATTGATTAA[C/T]GTGATAAGTGGTTCTGGATTGTCTACCATCTCCCA
Y	AX-123360183	Affx-88812567	AX-89818392	Affx-88812567	A	C	SNP	1	5903202	1	4377977	GAAGAGATGAACATATTGACAACAATCTTCTTGAA[A/C]CCTGACAATGAGAAGGTATACTATCCAAATTCAGT
N	AX-166520331	Affx-88812567	AX-89818392	Affx-88812567	A	C	SNP	1	5903202	1	4377977	GAAGAGATGAACATATTGACAACAATCTTCTTGAA[A/C]CCTGACAATGAGAAGGTATACTATCCAAATTCAGT
N	AX-123363518	Affx-88812569	AX-89847098	Affx-88812569	A	G	SNP-SNP	1	5903850	1	4378625	TTTTACTGTTACACCACCTCAGATATATCTGTATG[A/G]ATTGATGAAGAAATATTTCAAACTTCAGGTACTTG
N	AX-123357103	Affx-88812570	AX-89780235	Affx-88812570	T	C	SNP	1	5903895	1	4378670	GAAATATTTCAAACTTCAGGTACTTGGAGAGCAAG[C/T]CTCAGCACTGGCGTCCTGGGCATAGTGTGGCGGTG
Y	AX-166502977	Affx-88812572	AX-89780237	Affx-88812572	A	G	SNP	1	5906862	1	4381645	TCCATACCATTCTTTCTCAGGATAGTAGTAGAAGG[A/G]TTGACAGAAGTCACAACACCAATAACATCAAGTAT
N	AX-89780238	Affx-88812574	AX-89780238	Affx-88812574	T	C	SNP	1	5907115	1	4381898	AGTAAACTCTCCCAACCTCAATAATATCATAAAAG[C/T]GGTCAAGAACAGCATTAAAGCAGGTCACTCTTATT
N	AX-166502978	Affx-88812576	AX-89780239	Affx-88812576	A	C	SNP	1	5914267	1	4389059	TATGGTTTTTTGTGCCTCATTTGGAACCCATCTAT[A/C]AGAAAGTGTGTGGTTTTGCCTAGAACAACTGCTAC
N	AX-123360184	Affx-88812578	AX-89818394	Affx-88812578	A	G	SNP	1	5916054	1	4390846	GACCTCAATCACGCCTTGTGCAGTTGTGCATCATC[A/G]GTGAGCCCATGTCCATAGCAGAACTTTGTAGTTTC
N	AX-166510916	Affx-88812580	AX-89818395	Affx-88812580	A	C	SNP	1	5921035	NA	NA	GTCCTGGTAGCCCTGATTATGATCTCAGTGCGCAT[A/C]GGCGTAACCCTAACCTCAGCGCCGGAGTAGCCGTC
Y	AX-123366833	Affx-88812581	AX-89904279	Affx-88812581	C	G	SNP-SNP	1	5922812	1	4397605	ATTAATTAAATGAGATCATGGTCTTAGTAGGTAGT[C/G]TATGATTTGTTTAAATTTGATGCACTAGACTAAAA
N	AX-166509633	Affx-88812583	AX-89806499	Affx-88812583	C	CCTAG	Indel	1	5935545	1	4412505	TTGGAAAGCAGTTGAAGGTACCAAACCCAGTAACC[-/CTAG]CTACCTGGCTAATAATACAGAACCCTAGCTACAAT
Y	AX-123360185	Affx-88812584	AX-89818399	Affx-88812584	T	G	SNP	1	5943958	1	4420917	AAACATTTCTGAGGATGAAGAAGACCTCATTCTCA[G/T]AATGCACAAGCTTCTCGGAAATAGGTACCGGTATA
N	AX-123524251	Affx-88812584	AX-89818399	Affx-88812584	T	G	SNP	1	5943958	1	4420917	AAACATTTCTGAGGATGAAGAAGACCTCATTCTCA[G/T]AATGCACAAGCTTCTCGGAAATAGGTACCGGTATA
N	AX-166510917	Affx-88812589	AX-89818401	Affx-88812589	A	G	SNP	1	5956024	1	4432986	CAAGAATGTTATGTCCCATAATGTGGTAAGAACCA[A/G]AGCTGCCAAGTGCACCAAAGTATTCATCAACCCAC
Y	AX-89875538	Affx-88812589	AX-89818401	Affx-88812589	A	G	SNP	1	5956024	1	4432986	CAAGAATGTTATGTCCCATAATGTGGTAAGAACCA[A/G]AGCTGCCAAGTGCACCAAAGTATTCATCAACCCAC
N	AX-166520333	Affx-88812590	AX-89818402	Affx-88812590	T	G	SNP	1	5956330	1	4433292	AATGCAGCTGCATCAGCAATATTGGAGTGATAATG[G/T]TGGTAGTGGTGAGGATTGTGTTGCTGATGATCAAT
N	AX-123360186	Affx-88812591	AX-89818403	Affx-88812591	A	G	SNP	1	5977058	1	4455675	GCCTATATTTGGTCTGTGTTTTGAAACATGTGCAG[A/G]GAAGATATCAATGTGTTGGGTTGGAACCACACCAA
N	AX-123524252	Affx-88812591	AX-89818403	Affx-88812591	A	G	SNP	1	5977058	1	4455675	GCCTATATTTGGTCTGTGTTTTGAAACATGTGCAG[A/G]GAAGATATCAATGTGTTGGGTTGGAACCACACCAA
N	AX-123357105	Affx-88812593	AX-89780244	Affx-88812593	T	C	SNP	1	5979386	1	4458003	TTAATAGCCACAACATCCTGGGCAAAATCACAGTT[C/T]ATTCCTGTAGAGACCTGCATCCATCCAAAAGATAA
Y	AX-123524253	Affx-88812594	AX-89818404	Affx-88812594	T	C	SNP	1	5979579	1	4458196	TTATAGTGAAATGTACTCACATCATAGAGAGTATC[C/T]CCTAGCTTCATTTTGATAGCACCACTTCTGTACAC
N	AX-123357106	Affx-88812596	AX-89780245	Affx-88812596	A	G	SNP	1	5980603	1	4459220	GGAGCCCCATATGATCTTAAGGTCGATGATGATTG[A/G]CCCCCGGAACCAAATGCAACTTCCACAGGCTTCTC
N	AX-166517609	Affx-88812597	AX-89847100	Affx-88812597	A	G	SNP-SNP	1	5983702	1	4462319	GAACAAAATAAAAGAAGGGTATATTAAGCACTGAC[A/G]GTCTAAAGAGAGGAAAAGTTCTTCATATCTAACGC
N	AX-123360188	Affx-88812598	AX-89818406	Affx-88812598	T	G	SNP	1	5984419	1	4463038	CTATTACTGAATGTGAAAATGAAAGAACCTCAAAA[G/T]TAAGCGAGACCCTCTGTTTGTAAGACTGCAATTTC
N	AX-166502979	Affx-88812599	AX-89780246	Affx-88812599	A	G	SNP	1	5986877	1	4465506	GATGTTCGATACGAGAGGATTGCTATCTTGAATGC[A/G]TTGGGAGCCTATTACAGCTACCTTGGAAAGATTGA
Y	AX-166502980	Affx-88812600	AX-89780247	Affx-88812600	T	C	SNP	1	5987552	1	4466181	CGTTCAATGCGTTCAAGATTGTATTAGATGGAGAC[C/T]GTGATAATGTCCCTTCCCTTTTGGGTCAGGTTTGT
N	AX-166502981	Affx-88812601	AX-89780248	Affx-88812601	T	C	SNP	1	5988307	1	4466937	CAAAATGGGTCAATTTGAAAAAGCTTGGCAGGCAT[C/T]TCATCGGGTTTTAGAGGCAAGTGATATCTCATATT
N	AX-166510918	Affx-88812602	AX-89818407	Affx-88812602	T	C	SNP	1	5988435	1	4467065	AGTTAGATCCCGAAAATGTTGAGGCTCTTGTTGCT[C/T]TTGCAATTTTGGATTTGCATACCAATGCAGGTAAA
N	AX-166520334	Affx-88812602	AX-89818407	Affx-88812602	T	C	SNP	1	5988435	1	4467065	AGTTAGATCCCGAAAATGTTGAGGCTCTTGTTGCT[C/T]TTGCAATTTTGGATTTGCATACCAATGCAGGTAAA
Y	AX-123366834	Affx-88812606	AX-89904281	Affx-88812606	A	C	SNP-SNP	1	5991368	1	4470556	AAATCTGGTTGCTTTTTTATAATACTTTTTACATG[A/C]TAATAGGTCCTGGCTCAACATTCTGCTAATTTATA
Y	AX-123360189	Affx-88812608	AX-89818410	Affx-88812608	T	G	SNP	1	5991921	1	4471109	ACTGCAAGAAAACTTTAATGAGAGCCATTCATTTG[G/T]CACCTTCAAACTACACATTGAGGTTTGATGCAGGT
N	AX-166510919	Affx-88812609	AX-89818411	Affx-88812609	A	G	SNP	1	5991953	1	4471141	TTGGCACCTTCAAACTACACATTGAGGTTTGATGC[A/G]GGTGTTGTAATGCAGAAGTTCTCAGCTTCAACCTT
Y	AX-166520335	Affx-88812609	AX-89818411	Affx-88812609	A	G	SNP	1	5991953	1	4471141	TTGGCACCTTCAAACTACACATTGAGGTTTGATGC[A/G]GGTGTTGTAATGCAGAAGTTCTCAGCTTCAACCTT
N	AX-166510920	Affx-88812611	AX-89818412	Affx-88812611	T	C	SNP	1	5995321	1	4474509	TTTATTATTAGCATCCAAATCAAGCCATGATGATT[C/T]TCTATCTTTGGGAGGCCCTTCATCAAAGAAGTGAT
N	AX-166502982	Affx-88812612	AX-89780251	Affx-88812612	A	C	SNP	1	5995465	1	4474653	TGTTTGTAAAGCAGAGCAGGTCCTCTGTTTTGAAG[A/C]AGAGTCGGAACAACTCATTGTGAGCTGCCAATTGG
N	AX-166502983	Affx-88812615	AX-89780253	Affx-88812615	T	C	SNP	1	6000271	1	4479461	GCCCAAACATATATTAAGGTAGATGACAAGGTCCA[C/T]ATACCGAAACTCCTCCATGGTATACCTATCCCCAT
Y	AX-89818414	Affx-88812616	AX-89818414	Affx-88812616	A	G	SNP	1	6000606	1	4479796	TAAGATCTTAAAACTCTTAGGAAACCTTTGGCAGC[A/G]TCAACCTACACAACAAATAAAAGCATTAATGAAAA
Y	AX-123357107	Affx-88812618	AX-89780254	Affx-88812618	A	G	SNP	1	6002029	1	4481219	TGGAACAAATAATTACAATTTGCTTCTCCAACAGC[A/G]CCCCTGCAAACATTGCTAATACCTGCAATGTGTGA
N	AX-123357108	Affx-88812619	AX-89780255	Affx-88812619	A	G	SNP	1	6003060	1	4482250	TTTGCCCATTCAAGAATATCAATGAGATCAGAATC[A/G]TCTTGACCGGAGAAAGATGTCTCTTCTGTCTCTAT
N	AX-89818415	Affx-88812620	AX-89818415	Affx-88812620	A	C	SNP	1	6003144	1	4482334	CTCCTAAAATTCCTGTCTTCACTAGGAGAACCCTG[A/C]AAACTGCATAAAACACTTCTAGATGACATAAGTAC
N	AX-166520336	Affx-88812624	AX-89875554	Affx-88812624	T	C	SNP	1	6006485	1	4485675	TTGCATGAAAAACGAACTCCCCCAACCAGGGCTAC[C/T]CGTCTCTTCACTTTTATCCATGCTGAAAAAGTTTC
N	AX-166510921	Affx-88812625	AX-89818419	Affx-88812625	A	G	SNP	1	6011030	1	4490231	TTCTATCCGGTTTCGATGGGTTGGATCTGATCTAG[A/G]TAAGGGAGGCTCAATCAGCTACCGGAAGGTGAGAG
N	AX-166520337	Affx-88812626	AX-89875556	Affx-88812626	A	G	SNP	1	6012260	1	4491463	GGTTAAGGCATGGAAGAAGGTGGTCGACGCCGTTC[A/G]TGCCAAAGGTGCCATTATTTTCTGTCAACTGTGGC
N	AX-89803301	Affx-88812632	AX-89803301	Affx-88812632	C	CTTTGA	Indel	1	6026864	1	4506367	AGGAAGATGGCAATCAAGTTGATGATGGGATAAAC[-/TTTGA]TCATGTAAGTGGTGATGCCAATGACATTGGTCCCT
N	AX-166502984	Affx-88812634	AX-89780258	Affx-88812634	T	C	SNP	1	6027295	1	4506797	TGTTAGTGGCAGACTTAAAGAACATGAGACAAGTG[C/T]TGAGCATGTCAATTACTATGCTAGTTGGTGTGAGT
N	AX-166502985	Affx-88812638	AX-89780262	Affx-88812638	T	C	SNP	1	6027651	1	4507153	AGTTGATATGTTTGCTAGCTTATGAAATCAAGAGT[C/T]CTATTCTTAAAAAAATTAAAGAAGCTAAGTTCTTT
N	AX-166509634	Affx-88812642	AX-89806501	Affx-88812642	G	GTGCA	Indel	1	6030881	1	4510331	AAAGATGGGATCAATGATCGAACTGATGAGTACGG[-/TGCA]TGGCTCACTTGCAAACCGCTGCAAGTTCTTGATCC
Y	AX-166502986	Affx-88812645	AX-89780264	Affx-88812645	T	C	SNP	1	6034427	1	4513875	GATTTGGTGTCGTATGGACGACAGTTTATCTCAAA[C/T]CCTGACTTGGTGTTGAGGTTTAAGCTGAATGCTCC
N	AX-166510922	Affx-88812646	AX-89818422	Affx-88812646	T	C	SNP	1	6034504	1	4513952	CAAGTATAATAGGGAGACTTTCTACACTCATGATC[C/T]TGTTGTTGGGTACACAGACTATCCTTTTCTAGCTG
N	AX-89803304	Affx-88812647	AX-89803304	Affx-88812647	A	AAACG	Indel	1	6035452	1	4514901	GGACCACACCCCATATTCATCATCAACTCCAGTCA[-/AACG]ATTATAGCTCAGTCCTCCCCATCAAAACCCAACAG
Y	AX-89875561	Affx-88812649	AX-89818423	Affx-88812649	A	C	SNP	1	6036999	1	4516447	AGCCATTGGTGCTGATAGAGTTGCTGTCAGAGTCT[A/C]ACCAGCTATTGATCACCTTGATGCTATGGACTCCG
N	AX-166520338	Affx-88812651	AX-89875563	Affx-88812651	A	G	SNP	1	6037277	1	4516725	GTGGTTTTACTAGAGAGCTAGGAATGGAAGCTGTG[A/G]CTTCTGGTGATGCTGATTTAGTGTCGTATGGTCGC
N	AX-166502987	Affx-88812652	AX-89780265	Affx-88812652	T	C	SNP	1	6037844	1	4517292	GTGTTCCTACCCTTGAACTGATGTGTTCGATGAAT[C/T]TCCGGTTATATGTCCCTGCAAGTTCTGGGGTGTTA
N	AX-166520339	Affx-88812657	AX-89818425	Affx-88812657	T	C	SNP	1	6040091	1	4519539	TGTAGAGATTGATAACTTCTGTGGTTGCATGGATG[C/T]CATTTCCCTGCATTCCATAGCAAACACCTACGTTT
Y	AX-166502988	Affx-88812661	AX-89780270	Affx-88812661	T	C	SNP	1	6048835	1	4528284	ATGCACACACACCATGGAGCTTCAGAAATTGTACT[C/T]ATCATTGAAGGAACTATAACCGCCGGGTTCATTTC
Y	AX-123363519	Affx-88812663	AX-89847101	Affx-88812663	A	C	SNP-SNP	1	6049027	1	4528476	AGCAGTGATAACCCCGGTCTGCAGATTCTCCATAC[A/C]GCACTATTTCAAAACGATTTACCTACTGACCTAAT
Y	AX-123360190	Affx-88812664	AX-89818429	Affx-88812664	T	G	SNP	1	6055421	1	4534871	TCACAAGAAGAAAGATCTCACTTGCTCCGGGGTGT[G/T]TATGCAAAGGGACAACCGCACCGGGTGCCATGTCT
Y	AX-123357109	Affx-88812665	AX-89780271	Affx-88812665	A	C	SNP	1	6072986	1	4552636	GCAGGAATTCAACTTGATTGACAAAGGAGAGCTTG[A/C]ACCTCTTCAAGACCTTGTTGACTCTATTCTACAGC
Y	AX-123364721	Affx-88812666	AX-89867525	Affx-88812666	C	G	SNP-in-Insertion	1	6073165	1	4552816	ATGCCAACAAGCACCCTCTCTCTCTGTTTCTCTCT[C/G]AGTCTTCCTTGTAAGGACCAACCCCATAGTTTATT
N	AX-89780273	Affx-88812669	AX-89780273	Affx-88812669	A	G	SNP	1	6075609	1	4555259	TCACCTTAGACCAAGATATTGGTGTCTTGTTGAAA[A/G]GTTCAATTCCTGCATATTCAGGTGGTAATGCCTCA
N	AX-166510923	Affx-88812676	AX-89818433	Affx-88812676	T	C	SNP	1	6083584	1	4563235	TTTGTGATGATTTTATTAAGGAGTTTATTTCTGCT[C/T]GTGGCCACAATTTGAAGGAGCTTAGTTTGACTGAT
Y	AX-123363520	Affx-88812678	AX-89847103	Affx-88812678	A	G	SNP-SNP	1	6084681	1	4564332	GATTTGTGTCACTATTTTGACTTGAAATCTCCAAC[A/G]TGCTGAAATGAAATGTCTTTCATAAGTGTTGACCA
N	AX-166510924	Affx-88812680	AX-89818434	Affx-88812680	T	G	SNP	1	6092883	1	4570739	AGAGTGACTTGGTTCTGTGTTGCAGCTCTACATTG[G/T]TTAAGAAGACTGCTATGTGGAGCTCTTAAACAAAT
N	AX-123357111	Affx-88812683	AX-89780278	Affx-88812683	A	G	SNP	1	6093608	1	4571464	TTCATCCTTATTATAAGCAGAGTAAGAACGAAGCT[A/G]ATCAGACTGCTAAAGAACTATTCACCAAGGAACAC
Y	AX-123524256	Affx-88812684	AX-89818435	Affx-88812684	T	C	SNP	1	6093691	1	4571547	GAGAAAGGAGAGAAATGGCTGAAGGATACTTCGAA[C/T]TCTTGCATGGTTGTTGCAACTCTCATTGCTACGGT
Y	AX-89818436	Affx-88812685	AX-89818436	Affx-88812685	A	G	SNP	1	6097629	1	4575488	TGCAAAGTGCAGCATATTTGTTGCAACACCCTGGC[A/G]ACGTGCTGGTTTGCTAACACACAAGTTTGCAATAT
N	AX-123363521	Affx-88812689	AX-89847104	Affx-88812689	A	C	SNP-SNP	1	6103214	1	4581079	ACCCAGAGCCCTAATCATTTCAATATTCAACCATA[A/C]ATCACAAATTAAACATTGCAAATAAACAGTTGATG
Y	AX-123363522	Affx-88812694	AX-89847105	Affx-88812694	T	C	SNP-SNP	1	6116095	1	4593963	AGGAAAACCCGGGCAGTTTTGATCTGCCTGACCAT[C/T]CGTTGCAGCAAGTCACGGATCTTGATCTTTCAGAT
N	AX-89818443	Affx-88812697	AX-89818443	Affx-88812697	A	C	SNP	1	6121550	NA	4599421	TCCACTAGTGGACTGTGATGAAAATGCTAGTGCAT[A/C]TGTTCGCTCCCAACAAGCCAAGGCCTTGGGTAGTT
Y	AX-166518637	Affx-88812698	AX-89860629	Affx-88812698	A	ATCT	Indel	1	6121802	1	4599674	GTACTCTCATTATGCCTTCTTGTCACCCAAGATAA[-/TCT]GATGTGCATCCCGGTAACTACAGCTGGTTTTCTCA
N	AX-89847107	Affx-88812699	AX-89847107	Affx-88812699	A	G	SNP-SNP	1	6122534	1	4600405	AAGACTTTGGCAGACATGCAGAAATTGCCTGATAG[A/G]GAATTCCATTTCAAGGAAGTGAAGGTATATATTAC
N	AX-89865156	Affx-88812700	AX-89865156	Affx-88812700	T	C	F.innumae-derived	1	6130568	1	4609321	GATGTTCTGAAAGTATCTCTTTCCCTTTTGTCAGC[C/T]GATGACAGAACTGCCGTGCTTGTCTACTATAAAAC
Y	AX-123365079	Affx-88812703	AX-89875581	Affx-88812703	T	G	SNP	1	6144698	1	4623790	GAAGAACGTTGCAGCTGCAAAGCAACTGGGGTTCG[G/T]AACTCTGAATAGCCTTGAACATCCACGGCGATGCG
Y	AX-89875582	Affx-88812704	AX-89875582	Affx-88812704	T	C	SNP	1	6146712	NA	4625804	AATGAGACACTTAAAGGCATTTCCTGCTTCAAGGA[C/T]GTCTGTTACTTCTTCAGACTGTTCGAGCAAAACTG
N	AX-89847109	Affx-88812715	AX-89847109	Affx-88812715	T	C	SNP-SNP	1	6188143	1	4669823	TGCTATTAGGCAATGACACAGTCGTTGTTGTTGAT[C/T]GGAGATGACTATAACACCCATTGACTTTGAGGAAG
N	AX-123366835	Affx-88812717	AX-89904284	Affx-88812717	A	G	SNP-SNP	1	6188816	1	4670497	GGCACTAATGACATCTTTGCCCTCTCAAAGAGCAT[A/G]GAACTCTTGCATATGAGTAGTTAGAGGGAAAAAAT
Y	AX-166502991	Affx-88812718	AX-89780286	Affx-88812718	T	C	SNP	1	6190047	1	4671728	GTGAAGAAAATCACATGTTGGTCTGTACTCCCAAG[C/T]TGCTACAAATCTGAGTTCCGAGCTCCCCAGAACAA
Y	AX-123614517	Affx-88812721	AX-89806506	Affx-88812721	T	TGTAC	Indel	1	6195834	1	4677522	GCTCCACAACTGCAACAAGCGGGAACTTCCGAGGT[-/GTAC]GTTGACAACCCAGAAACTTCCTCCATACTTAAATC
Y	AX-166520342	Affx-88812723	AX-89875590	Affx-88812723	A	G	SNP	1	6197524	1	4679211	GGGTGGGAACCGAACTTGAGATGCATTATTGGTCC[A/G]TAAGTTTGGGATAGCTTGTGAAGGCTTTGGTGAGG
N	AX-166509635	Affx-88812726	AX-89806508	Affx-88812726	C	CTATA	Indel	1	6199894	1	4681584	CAACCATTTCATGTATACTTGCTAGACAGTGTGAC[-/TATA]TATGTTGTGATACTAGTTAAATATGTTAACATTAT
N	AX-166502992	Affx-88812728	AX-89780287	Affx-88812728	A	G	SNP	1	6200554	1	4682243	CGTGAGATAAAAGCACGAGTTTCCTCAACACGGAT[A/G]TACGCAAAGGACTCTAGCCTTTTCGAGCTGAATAG
N	AX-123614519	Affx-88812735	AX-89806509	Affx-88812735	C	CACGT	Indel	1	6207301	1	4688618	AACACAAACATACGTACCTGAGTGAATCCTTTGAC[-/ACGT]ACTGTCATAGTTAAGCTTAACTTCAATATTAGGAT
Y	AX-166502993	Affx-88812741	AX-89780290	Affx-88812741	T	C	SNP	1	6220372	1	4701693	TGAAGATACTGTTTACAACCTCCACACCACTAGAA[C/T]TCCAGAGTTTCTAGGCTTGGAAACCGCTAACGGGT
N	AX-166510929	Affx-88812742	AX-89818461	Affx-88812742	T	C	SNP	1	6232433	1	4713842	GTATTCGGAGTCATTGCCATTCTCGATTACATCTA[C/T]GGTGAATCCACCAGGTGCTAACTATCAGATATCAA
N	AX-166502994	Affx-88812743	AX-89780291	Affx-88812743	T	G	SNP	1	6234036	1	4715445	AGAATTGATGGATTTATTCCAAAAATCACACCCAG[G/T]GCCACCAGTAGTGAAACTAGCTCATTTGCAACAAT
Y	AX-166510930	Affx-88812746	AX-89818463	Affx-88812746	T	C	SNP	1	6237689	1	4719098	TCCCTCGAGATGGGGAAAATACTTGCTGAAGGAAT[C/T]GGGGAAGTTCAGGTATCAGTGGTCAATTTTTTATT
N	AX-166509636	Affx-88812752	AX-89806512	Affx-88812752	C	CTATA	Indel	1	6247921	1	4729331	ACTAGTACTACTGCTCTCTATCGGCTTAGTCCGAC[-/TATA]TATTAATGATGAGAAATGCTAGTGATGTTTCTCTT
N	AX-166520343	Affx-88812753	AX-89875598	Affx-88812753	A	G	SNP	1	6248104	1	4729513	CTGAAAATGGGGTCACGGTTCTTGCTTCACACGTT[A/G]ATGGATCCAAAATAAGGTAAGAGTCTGCTGCATAC
Y	AX-123365081	Affx-88812756	AX-89818464	Affx-88812756	T	C	SNP	1	6251209	1	4732620	CAGAATTCAGAGGACTGATCTTCATTACCCTTATT[C/T]GAGGAGCTGAAAATGAAAGACATCAATGATTGACC
Y	AX-166520344	Affx-88812757	AX-89818465	Affx-88812757	A	G	SNP	1	6251560	1	4732971	ACATAAAAAAAGAGCACCTGCCCACAAAAATTCTA[A/G]ATGAGCCGGCTTTCTGCCGTACAATACAAGAAGTT
Y	AX-166502995	Affx-88812762	AX-89780295	Affx-88812762	T	C	SNP	1	6253203	1	4734615	TTGGAGGCATAAGGACTCCATCACATCCTTCTGAA[C/T]TCTGCAGAACAAAGGAATAAATGATGATTAAATAG
N	AX-89818469	Affx-88812766	AX-89818469	Affx-88812766	A	G	SNP	1	6253888	1	4735300	GCTTTGTCATAAATCCAGGTGTTGCAATCAACTCG[A/G]GCGTCACATATAGAAGCCTCAAAGACGGTCTTCCA
N	AX-166509637	Affx-88812768	AX-89806514	Affx-88812768	A	ACATG	Indel	1	6256725	1	4738139	TGCACATTTTTTGTTACAAACGTGGACTCGGCAAA[-/CATG]CATGAAAAGAAAAGAAAAAAATTTCACATTCACTA
Y	AX-123365082	Affx-88812778	AX-89818472	Affx-88812778	A	G	SNP	1	6267656	1	4749070	GTTTTGGAGATTCTGTTAACCCTTAGATTGGGGTC[A/G]GAGTAAGCACAACAGTATCTGCCTGAGAACCTGAG
N	AX-89818474	Affx-88812779	AX-89818474	Affx-88812779	A	G	SNP	1	6269116	1	4750530	CGATGGTCTACGCCGTGATTTCCGACCCGACGATC[A/G]TCGACAACCCGGACATCCCGAGCTACCAGCCGCAC
Y	AX-166510931	Affx-88812782	AX-89818477	Affx-88812782	T	C	SNP	1	6277868	1	4759290	ACTGGTAAACACTTGTGTTATGTAGAACAGTTGGT[C/T]GGATTGTCTCCTTTAATTTGCTGGGACGACTCCCC
N	AX-166520346	Affx-88812782	AX-89818477	Affx-88812782	T	C	SNP	1	6277868	1	4759290	ACTGGTAAACACTTGTGTTATGTAGAACAGTTGGT[C/T]GGATTGTCTCCTTTAATTTGCTGGGACGACTCCCC
N	AX-89780307	Affx-88812785	AX-89780307	Affx-88812785	A	C	SNP	1	6278181	1	4759603	GAGCTGGTATCCTTGTTTTGCACAAACCAGTCATG[A/C]GTATGAAACCTTTGTAGTTATTGATAGGCATGATT
Y	AX-123524257	Affx-88812788	AX-89818481	Affx-88812788	A	G	SNP	1	6281964	1	4763386	TTTAGCATATGGACACCTTCACGTGTGGCTTGATG[A/G]TCTTGAGACCCTCATGAACAGCATGTTGGCCCAGC
N	AX-89780308	Affx-88812790	AX-89780308	Affx-88812790	T	C	SNP	1	6282941	1	4764363	ATGGATTGTTGACAATTGGGACATTAGGAAGCAAT[C/T]ATGAATCAAAAGAAGTTCTACATGCTGCTCCACCA
Y	AX-166520347	Affx-88812795	AX-89818486	Affx-88812795	T	C	SNP	1	6288843	1	4770266	GTCTCAGAATCCCTTGGAGCAGCTTTGGTCAGTGC[C/T]CCATCTGGTGAAATGTTGTAGTCCTTTGTAGGAAA
N	AX-166510932	Affx-88812796	AX-89818487	Affx-88812796	A	G	SNP	1	6288899	1	4770322	GTCCTTTGTAGGAAATGCACCAAACCAAACATTTG[A/G]AGGGACTGTGTACTGGGGTTGCTGATCCTCGTCAA
N	AX-166510933	Affx-88812799	AX-89818488	Affx-88812799	T	G	SNP	1	6293109	1	4774532	ACAGTATTGATTTCTGGGTTCTGACAGAATATGGG[G/T]TGCCAGATTCGTGGACAAAGTTGTTTATTTTGAAA
Y	AX-123524258	Affx-88812800	AX-89818489	Affx-88812800	A	C	SNP	1	6293166	1	4774589	TGTTTATTTTGAAAATGGAGATTTTTCCTAACCTT[A/C]CTACGAATAGGACTTGGGATGCACGATACTTGGTT
N	AX-166520348	Affx-88812804	AX-89818490	Affx-88812804	A	C	SNP	1	6302954	1	4784380	TTGGACACTTCATCCATATGACTGCAAGAATATTA[A/C]AATTAGAAATGTTACAATTCTGGCTCCCATATTTG
Y	AX-166509140	Affx-88812806	AX-89803316	Affx-88812806	A	AGTT	Indel	1	6305214	1	4786641	TTTATTTATTAACCGATTCCAAGAAACCATGGATA[-/GTT]AGGACAGGACAATGAGATGAATACTATTAACTTGA
N	AX-123357114	Affx-88812807	AX-89780311	Affx-88812807	A	C	SNP	1	6317829	1	4799048	CTTTTACAAATTTACAGGATGAACAACCTGGCTCC[A/C]TACCAAATGAGCATCGCTGGTCTTTCCGCCCCTTC
Y	AX-166503000	Affx-88812811	AX-89780314	Affx-88812811	A	G	SNP	1	6336426	1	4815878	TGGATACTGGTTTGCTGCTAAATCGCAAGAATAGC[A/G]GTACAGAAGAAGATCTGATCTCTCGAATAAGGCGA
N	AX-166510935	Affx-88812825	AX-89818500	Affx-88812825	A	G	SNP	1	6378416	1	4859353	GTTACATGGGCAAAATTTAGTAAATATACCTTTAC[A/G]GAACTTCCAACTTCCTCAAGTTTCTGCAATAGTGT
Y	AX-166503002	Affx-88812829	AX-89780318	Affx-88812829	A	G	SNP	1	6381481	1	4862419	ACAGGCTCCACTAATGAGGATTATAAACTTCCATC[A/G]CAATTGACTCAGAGATATGTTAAAGGTGTGTATCA
N	AX-166520350	Affx-88812833	AX-89818506	Affx-88812833	T	G	SNP	1	6395474	1	4876518	CCATTGGTTTCTTTGCCACCAGTTGGAAGTCTTGT[G/T]GTTTATTTTCCTCAAGGCCATAGTGAGCAAGTGAG
Y	AX-123365083	Affx-88812836	AX-89875633	Affx-88812836	A	G	SNP	1	6396529	1	4877573	AAAGGCACCTGCTGACTACTGGTTGGAGTGTTTTC[A/G]TTAGCACAAAAAGACTCTTTGCTGGAGATGCTGTT
Y	AX-166510936	Affx-88812840	AX-89818509	Affx-88812840	A	G	SNP	1	6397043	1	4878087	ATGCGATTCAGAATGATGTTTGAGACTGAAGAGTC[A/G]GGAGTTCGCAGATACATGGGTACAATCACTGGCAT
N	AX-166503003	Affx-88812841	AX-89780322	Affx-88812841	A	G	SNP	1	6397557	1	4878601	GATGATGAATCTGACATAGAGAATGCTTTCAAGAG[A/G]GCCATGCCATGGCTTGGAGATGAGTTTGGCATGAA
N	AX-166520351	Affx-88812848	AX-89875638	Affx-88812848	A	G	SNP	1	6401977	1	4883021	CCCCAACAGCAACCACTTCACCTCCCTGAGGCTTT[A/G]TCTGAGCTGTAGTTGGAAGCAAAATTCCACCAGTA
N	AX-166509638	Affx-88812850	AX-89806516	Affx-88812850	T	TCGTA	Indel	1	6415271	1	4896253	CCAATGTGTTCTCATCATCGTCTCGCATGAAAGAT[-/CGTA]CGTGGAATATGATACCTTCAATACAATTAACAGTT
N	AX-123614521	Affx-88812854	AX-89806517	Affx-88812854	T	TCCGG	Indel	1	6418524	1	4899506	GAATTCTGGGCTTGCCATCGATGGTGATGGATCTT[-/CCGG]CCGTCATGAGAAACTTTGATGGCACTTGCATATGA
N	AX-89875644	Affx-88812862	AX-89875644	Affx-88812862	A	G	SNP	1	6430210	1	4911177	AGAGATTGCATACCTCCAAAGCCGCATGAGCCTCC[A/G]CGTCTGGAGTTAGAGATGATCCATGTTCTTATTCG
N	AX-123357117	Affx-88812868	AX-89780329	Affx-88812868	A	G	SNP	1	6436474	1	4917442	AGAGTTTGCAAGCTCAAGCATATTATTCCACGAAT[A/G]TCAGGTTCATCACGAAGAGCGTTGCACAATGGTTG
N	AX-89780330	Affx-88812869	AX-89780330	Affx-88812869	T	G	SNP	1	6437442	1	4918410	TTTGATCAAGCTTTCATCAATGCAAGCATGAATAA[G/T]ACTCTTAAATGCATTCGCTGCTGCATGAATGGCCT
N	AX-89780331	Affx-88812870	AX-89780331	Affx-88812870	T	C	SNP	1	6437938	1	4918906	TAAGATCTCGTTTTTATTCTTGGTCGACATAAGAG[C/T]GAGACACTCCTTAAAAGCATCCAAAAGATATAGAA
N	AX-89780332	Affx-88812871	AX-89780332	Affx-88812871	T	C	SNP	1	6448612	1	4930196	GTTTGTATCCTCATCAAAATACAATGTAAACTTGA[C/T]GCCTTTCGTCACACCTCCGTCATCTTCAAATCTAC
Y	AX-166509141	Affx-88812873	AX-89803319	Affx-88812873	T	TACA	Indel	1	6455543	1	4937282	AACCTTGCGCTTGTGTGCAAAATAACATAGCTCAT[-/ACA]GTCATACTACTTAATCAAGTCTCGAAGTGTATAGG
N	AX-166503004	Affx-88812875	AX-89780335	Affx-88812875	A	G	SNP	1	6456070	1	4937808	GTTGGATACAAGAAATCAGCCCTTGATTTAGCTGT[A/G]GAGTGTGCTGAGGCAAATCAAGGTAATATAGCTTA
N	AX-166510937	Affx-88812879	AX-89818519	Affx-88812879	T	C	SNP	1	6459085	1	4940823	CCTGGGGTCTCATCAGCAGGGTAGAAATAGAGAAC[C/T]AAAGGCTTTCCTTTGAACTTGGAAAGGCTGACGGA
N	AX-166520352	Affx-88812882	AX-89818521	Affx-88812882	T	C	SNP	1	6464501	1	4946231	TTGGACCATGGTGATTAGAGTCGATCTTGCATCAC[C/T]CTCTTCATAGACACTCGTAAGGTAGTTGTGAAGTT
N	AX-166503005	Affx-88812883	AX-89780336	Affx-88812883	T	C	SNP	1	6464662	1	4946392	ATTGCTTTACTTTGTGATCCATTTCTGCCACTTCA[C/T]CCATGACTCCTTTAAACCACTCGAAAGAGCCAGGT
N	AX-166503006	Affx-88812884	AX-89780337	Affx-88812884	A	G	SNP	1	6465391	1	4947121	CCACTTCTGTACTTAAATCCAGGTGGCTTGGACAT[A/G]ATTAAGCTGATAACATTTCCGGGTAGGTTTGAAGC
N	AX-166510938	Affx-88812885	AX-89818522	Affx-88812885	T	C	SNP	1	6465521	1	4947251	AGGTGTAGAATTTAGTGAAGTTCAGACACCTTTAG[C/T]ATCTTAACTGCATAGTGTTTTGATCTACATGTTCG
N	AX-166510939	Affx-88812888	AX-89818524	Affx-88812888	T	C	SNP	1	6475141	1	4956878	AGCAAGTTGACTGGAATTAGGCAGATTGTTAAGTT[C/T]AAAGAAATCCTGCAGAAATGGCAATCTGTCACGTT
N	AX-166519397	Affx-88812890	AX-89865164	Affx-88812890	A	G	F.innumae-derived	1	6475342	1	4957079	ACCCTTTCGGCGGAAAACAGTCCCTTATCTAGTCG[A/G]GGAACCCTTTCACCAGCAATTAGTAGGAGGCTCAC
N	AX-166510940	Affx-88812897	AX-89818526	Affx-88812897	A	C	SNP	1	6507868	1	4990794	AAATTGGAGTATCAGAGACTGTGTGTGAGAACGGA[A/C]GACGGCGGAGTGGTGGCGTTGGATTGGCCGGCGAG
Y	AX-166503008	Affx-88812904	AX-89780343	Affx-88812904	A	G	SNP	1	6514435	1	4997446	ACTCCATCTTCTTTGGACGCCATGAAATTGCTCTC[A/G]GTGTATGGACATGTACTTACACTGATTGGTCAAAG
N	AX-123365086	Affx-88812906	AX-89875655	Affx-88812906	A	G	SNP	1	6520007	1	5003023	AACATCTCCAGGAAGCCTCTACAGCAGGGAACCCC[A/G]TACTCCAAGATGGCTCTGCATTGCCGCCTTACCCT
Y	AX-89875658	Affx-88812909	AX-89818530	Affx-88812909	A	C	SNP	1	6523211	1	5006227	AGAGGGGACTTGGCTCAGCATGCCCGGAAAATGTC[A/C]ACATAATTTGAAAGCTGTTATTGATATTCCAAGTC
Y	AX-166520354	Affx-88812915	AX-89818533	Affx-88812915	A	G	SNP	1	6535186	1	5023948	ATCCATCTGAACTGCCCATTCAGCTTGTAGGTGTC[A/G]ATCAGCTCATACATCTTCTTCAGCTCAGCTTTCTC
N	AX-166503010	Affx-88812916	AX-89780349	Affx-88812916	T	C	SNP	1	6535546	1	5024308	GAAACAATGTTGAACTTGGGATCAAAGACATCAAT[C/T]CCATGAACAACACGGTAGAGACCGGGCATGGTGAA
N	AX-166510941	Affx-88812917	AX-89818534	Affx-88812917	A	G	SNP	1	6535651	1	5024413	TTGCTTCCGGCAATCTCCTGGAAGGTACTGGTGAT[A/G]ATGAAGTCGGTGTGGTTCATGGCGATAAGATCAGC
N	AX-166520355	Affx-88812917	AX-89818534	Affx-88812917	A	G	SNP	1	6535651	1	5024413	TTGCTTCCGGCAATCTCCTGGAAGGTACTGGTGAT[A/G]ATGAAGTCGGTGTGGTTCATGGCGATAAGATCAGC
N	AX-166510942	Affx-88812918	AX-89818535	Affx-88812918	A	G	SNP	1	6535741	1	5024503	TGGTACTTGTCATCTAGTTTCTTCCAGTAAAGGTC[A/G]GAATCAGGGTACTTGGTCTTCTCCAAAGCATGGGC
Y	AX-166520356	Affx-88812918	AX-89818535	Affx-88812918	A	G	SNP	1	6535741	1	5024503	TGGTACTTGTCATCTAGTTTCTTCCAGTAAAGGTC[A/G]GAATCAGGGTACTTGGTCTTCTCCAAAGCATGGGC
Y	AX-166503011	Affx-88812919	AX-89780350	Affx-88812919	T	C	SNP	1	6536060	1	5024822	AAATCTTGAGATCCATTTGCGGACAATTCCCTTCT[C/T]GGTTCTAAAGGGAACACGAAGAATATCGGAGTGTT
N	AX-166520357	Affx-88812922	AX-89875664	Affx-88812922	A	C	SNP	1	6537285	1	5026047	ATGTACTCCCAAACACCAGGCCTGGGACGAACAGC[A/C]AGTGCCACCCATGGAGGAAGAACAATAGCTTCCTA
N	AX-166510943	Affx-88812923	AX-89818536	Affx-88812923	A	G	SNP	1	6546199	1	5034918	TGTTTGGCCCAACATGCTCAACTCAGAAGGTTTAT[A/G]AAGAAGGGGCCAAGGATGTTGCTTTATCTGCGCTT
N	AX-166509142	Affx-88812927	AX-89803323	Affx-88812927	A	ATTC	Indel	1	6547401	1	5036121	GCACTTTCATGCAGACTGCATTATCACTTCTATCA[-/TTC]TTCACTAGTTATTGTCATAATCAGGATGAATTATG
N	AX-89860633	Affx-88812927	AX-89803323	Affx-88812927	A	ATTC	Indel	1	6547401	1	5036121	GCACTTTCATGCAGACTGCATTATCACTTCTATCA[-/TTC]TTCACTAGTTATTGTCATAATCAGGATGAATTATG
N	AX-89818537	Affx-88812929	AX-89818537	Affx-88812929	A	G	SNP	1	6548252	1	5036972	TTGCCCTGCCTAACCTTGTTTCCATAATTCACAGA[A/G]AATAGCCAGACTTGAAGCAGAGCTGAGGAGTCCAG
Y	AX-89818538	Affx-88812931	AX-89818538	Affx-88812931	A	G	SNP	1	6549170	1	5037890	ATTCCTTTCAGCCTAAGCAATAGTGCAAATATGCC[A/G]CATCTGATTCGGTCTCCTTGCTCACCTATGACCCC
N	AX-166520358	Affx-88812934	AX-89818540	Affx-88812934	A	G	SNP	1	6549952	1	5038671	ATGGAGGAGGACAAAGAAGCTGGAACTGAAGAGAC[A/G]GATAAAATCAATGAATCTATTCCTTTGGCATGGCA
N	AX-166510944	Affx-88812936	AX-89818541	Affx-88812936	T	C	SNP	1	6550096	1	5038815	AGCCAATTCTATCTGTTGTTCAAGGGCGATCCCTC[C/T]GATCAGATATACATGGAAGTTGAACTCAGAAGATT
Y	AX-89875670	Affx-88812936	AX-89818541	Affx-88812936	T	C	SNP	1	6550096	1	5038815	AGCCAATTCTATCTGTTGTTCAAGGGCGATCCCTC[C/T]GATCAGATATACATGGAAGTTGAACTCAGAAGATT
Y	AX-166518638	Affx-88812937	AX-89860634	Affx-88812937	T	TATG	Indel	1	6552169	1	5040891	TGTAATTTTTGGATATGCAGTTTGAGCCGGAGCGT[-/ATG]AGTACTCAGATTGTTGCTCGTATTTTGGTTAAGGT
N	AX-89780357	Affx-88812938	AX-89780357	Affx-88812938	T	G	SNP	1	6552902	1	5041623	CTTATGAGGAAATGGTTTGCAGGTTTTGAGCAAGC[G/T]ATCCAAGCTTATGCAGTTCATGTTCTTTCCTTGAC
N	AX-166503012	Affx-88812939	AX-89780358	Affx-88812939	A	G	SNP	1	6553154	1	5041875	TGGACAAATTCCTTGAGCATCATGTAGCCAACAGC[A/G]GATGGGCTCTTGAAAAAGGTCATGGCAAGGGCCAA
Y	AX-89780360	Affx-88812942	AX-89780360	Affx-88812942	T	C	SNP	1	6555297	1	5044017	TGGGAAGTCTTCAGGAACATTGGAACTCTCTCCAT[C/T]AGTGAAGGATGATCCTATTCCTGTCTGCCCCTTTC
N	AX-166520359	Affx-88812945	AX-89818544	Affx-88812945	A	G	SNP	1	6559031	1	5047753	GTTAAACTCAAGGCATATGTAGCCACCTTGCCCAA[A/G]AGTAGTAGCGCATTTACAGCTTTGCTGCAGGGAAG
Y	AX-89818545	Affx-88812946	AX-89818545	Affx-88812946	T	C	SNP	1	6559708	1	5048430	GACATACATATTATATCTGGTTTGATGTTCAAACG[C/T]GATGTTTCTTGTGACCAATAGAGAGGGATTGAGCC
N	AX-166503013	Affx-88812950	AX-89780362	Affx-88812950	T	C	SNP	1	6561751	1	5050474	TAACAAGTAGTGACAAACTTCAATCCACCAGTGAC[C/T]TTGTTCCCTTCATGTACCCGCCTCAAGAGGTCAGA
N	AX-89780363	Affx-88812954	AX-89780363	Affx-88812954	A	C	SNP	1	6567710	1	5056435	ACGCAAGTGGTTGTAAATGTCACAAGCAAAGGTTG[A/C]ACAAAGCTGCGGATCCATGAAGCTGTTATCAATAT
N	AX-123524260	Affx-88812956	AX-89818546	Affx-88812956	T	G	SNP	1	6570537	1	5059262	ATGCCACGGAACCCTACACCGAGCACAGAACAATC[G/T]CCAACAATGCGGACACTCTAATTCCCTCACAAGAT
Y	AX-89780368	Affx-88812959	AX-89780368	Affx-88812959	A	G	SNP	1	6571270	1	5059995	GTGGTATCAGTATCAAAGGTATCCATAGGAGATTG[A/G]CACTCTTCTCTCTTCATCTTTTCTTAGTAGCTAGG
Y	AX-89818549	Affx-88812964	AX-89818549	Affx-88812964	A	C	SNP	1	6575156	1	5063881	CCTCAAAGAAACACTACAAGGATAAAGTCGTTCGC[A/C]GCAAGTAAGTCAAAATTTCTCACACTAGCTTTTTT
N	AX-166503014	Affx-88812967	AX-89780371	Affx-88812967	A	C	SNP	1	6577745	1	5066470	AATATACTGAGCAAATGGCCTATCCTGAACAGTAC[A/C]TCCAGCCAAATATGGAGGGTTATGATGTGCAAGAA
N	AX-166510945	Affx-88812969	AX-89818551	Affx-88812969	A	G	SNP	1	6577902	1	5066627	ACTTCAACAATTGAGGGAGAAAGATGCTCGAGAAA[A/G]GGATCCCAACTTTATCTCGGAGAGTTATTCTGAAT
N	AX-123524262	Affx-88812974	AX-89818555	Affx-88812974	T	C	SNP	1	6582403	1	5071128	ATGGACTTCATCATTGTCCTTCCTGATCTAAAAGC[C/T]GTGAAAACTTTTTCTAGTCGCATGCATTTTTCTCT
Y	AX-166520360	Affx-88812977	AX-89875685	Affx-88812977	T	C	SNP	1	6583976	1	5072701	CAACTAGAAGACTCATTCGACTTCAAGGGCTGTGC[C/T]CATTTTTATTGTACTCCATGCATTGTCAAATTTGT
N	AX-89875688	Affx-88812982	AX-89875688	Affx-88812982	T	G	SNP	1	6586226	1	5074952	CAGTAGTACTAGTAGAAACTCACGGAAGACTAGTA[G/T]TAGTACCATAAATGCTGAAACCGGGAAACCTTCTG
Y	AX-166520361	Affx-88812986	AX-89818559	Affx-88812986	T	C	SNP	1	6586923	1	5075649	AATGATGCTAGTACTAACAGTGACACTAGTACTTT[C/T]ATATGTGATCTCTGCGTCGAGTCCTTTCCGCTTGA
N	AX-89818559	Affx-88812986	AX-89818559	Affx-88812986	T	C	SNP	1	6586923	1	5075649	AATGATGCTAGTACTAACAGTGACACTAGTACTTT[C/T]ATATGTGATCTCTGCGTCGAGTCCTTTCCGCTTGA
Y	AX-123365087	Affx-88812987	AX-89875691	Affx-88812987	T	C	SNP	1	6587087	1	5075813	CATCATGTGCCCCGAACCAGGCTGCTGTGGAGTGT[C/T]AGACCCTGAGTACTGTCATCCAATCCTACCAAACG
Y	AX-123524263	Affx-88812994	AX-89818564	Affx-88812994	A	G	SNP	1	6592008	1	5080734	CTGGGTCAGGAAGTGGTTCAGTTCATGCTCGACTC[A/G]GATACACACGTGTGGAGCATGAGGAGAAGTAAGGC
Y	AX-123360206	Affx-88812998	AX-89818567	Affx-88812998	T	C	SNP	1	6595199	1	5083926	CCAAAACAATGTCACATCCATTGGATGCCCTGAGC[C/T]GGGATGCATGGGAGTATTAACCCCTGGGTACTGTC
N	AX-166510946	Affx-88813001	AX-89818568	Affx-88813001	T	C	SNP	1	6595657	1	5084384	AATCTTCAAATCCTGACAGCAATGATGCTATTACT[C/T]TTACATGTGATATATGTGGGGAAGCAATTCTTCAT
N	AX-89803325	Affx-88813003	AX-89803325	Affx-88813003	G	GTCA	Indel	1	6595983	1	5084711	GTGAATTCTGTGTTGAGGCAGTTGGTCTCGAAGAG[-/TCA]TTTAGTGTCAAGGGTTGCAGCCATTTCTACTGTCA
Y	AX-123365088	Affx-88813004	AX-89875697	Affx-88813004	A	C	SNP	1	6598276	1	5087003	AAGGAGTCTATCAAGGCCTCTATTCTCAAATCCCC[A/C]GGTAATTTCATCGACCTTTCTGATGAAACTATGAA
N	AX-89780381	Affx-88813005	AX-89780381	Affx-88813005	T	C	SNP	1	6598386	1	5087113	CCGAAATATTACATTCGGAAAGCGAAGAAATAAAC[C/T]CAAACCCTTTAGTGGTCATTCTGTAACCGAATATG
Y	AX-123524264	Affx-88813010	AX-89818570	Affx-88813010	A	G	SNP	1	6602390	1	5091112	CTTCCAGTTTGGTGAAGGATCTAGTTGTTTGTGAG[A/G]TTTGTGCTGAGGACAAGTCTGCAAACGACTTGTTT
Y	AX-89818571	Affx-88813012	AX-89818571	Affx-88813012	T	C	SNP	1	6602476	1	5091198	AGCCATTCATACTGTAGGGACTGCGTAAATAATTA[C/T]GTGGCATCCAAGCTTCAAGAGAACATTGCAAGCAT
N	AX-166503015	Affx-88813020	AX-89780383	Affx-88813020	A	C	SNP	1	6606331	1	5095055	AATACCAAGAATGATTTCCCATCTTTTGTTTGTGA[A/C]ATCTGTGTTGATTACAAGCCTGCCAACGAGTTATT
N	AX-123365089	Affx-88813025	AX-89875703	Affx-88813025	T	C	SNP	1	6615770	1	5104492	GACTATTATGGTGCAATCAATAACGAGGAGTTTGA[C/T]AGTGTGTATGAACCACAAAAAGTGCATTCTGATGG
N	AX-166503016	Affx-88813033	AX-89780386	Affx-88813033	T	G	SNP	1	6619142	1	5107864	AAGCCTCTTGGGAGGTTTTTACGAGACCATCTGTT[G/T]GATCAGGTATTTAGCACGTCTTGACAGTTACCTTT
Y	AX-166520362	Affx-88813036	AX-89875709	Affx-88813036	T	G	SNP	1	6622076	1	5110811	AAGAAGTGGGGTGCCCAGGGTGGAAAGAGCAACGT[G/T]TTCTTTGCTAAAACCTTGGATGATCGGTTTATCAT
N	AX-166503017	Affx-88813037	AX-89780388	Affx-88813037	T	C	SNP	1	6622148	1	5110883	AAACAAGTCACAAAGACAGAGCTGGAATCATTTAT[C/T]AAGTTTGCACCAGCTTATTTCAAGTATTTGTCTGA
N	AX-166520363	Affx-88813039	AX-89875711	Affx-88813039	T	G	SNP	1	6622920	1	5111655	CCAACCGTGATTTCACCCCAGCAGTATAAGAAACG[G/T]TTCAGGAAAGCTATGGCTACTTATTTTCTTATGTT
N	AX-89780389	Affx-88813041	AX-89780389	Affx-88813041	T	C	SNP	1	6623587	1	5112322	TTCATACCAAATTCGAGCGATCTCGTCTCGACATG[C/T]GCATAGGAGCAAACAAAGAGGTCTCCAATATGCCT
N	AX-89780391	Affx-88813047	AX-89780391	Affx-88813047	A	G	SNP	1	6627360	1	5116332	GAAAACTTACAGATGTAGTTTCAAGTTCATCTGTC[A/G]CGGCCTTTTCCAGCTTTGCAGGGTAATCCAAATCT
N	AX-123365090	Affx-88813048	AX-89818582	Affx-88813048	A	G	SNP	1	6627599	1	5116571	GCACGGAAAGTCAACCGCTCATGAACATCAGCAAG[A/G]ATTCTCTCCAGTGTAGGCCGTAGACCGGCTAATGA
Y	AX-123365091	Affx-88813049	AX-89875716	Affx-88813049	T	C	SNP	1	6629178	1	5118151	TTCTACACCCTCAGAAACAGAAGCTTTGCTGCCAC[C/T]ACTGCTTCCAATAGCTGCCTGTACCTAATGTAAAA
Y	AX-89780392	Affx-88813050	AX-89780392	Affx-88813050	A	G	SNP	1	6629499	1	5118472	ATTCAATGGTCTTGAAAATTATACCTGCAGTTGGC[A/G]AAATTTGAGTAGGTATACACTGGATTCTGCATATT
N	AX-166503018	Affx-88813052	AX-89780393	Affx-88813052	T	G	SNP	1	6630600	1	5119573	CATTCAAACCTTACATTCTCCAATTCATCAAAGTA[G/T]TTGAGCTTACTGCGGAGAGCCTCTGAAAACTCAAT
N	AX-166520364	Affx-88813055	AX-89818585	Affx-88813055	A	G	SNP	1	6634366	1	5123341	CCCTCAGCATCAATGTACATTGCTTTTCCCTCACC[A/G]CCTCCTTGATCTAATGGGAGCTGAAACATTAAAAA
Y	AX-166510947	Affx-88813058	AX-89818586	Affx-88813058	A	C	SNP	1	6638031	1	5127008	CCAACGATGCTACACTTGTAGAGAACGGAGTGATC[A/C]GAAGAGATGTACAGAGCTAGGGCTTGTTCTGCGTC
N	AX-166520365	Affx-88813058	AX-89818586	Affx-88813058	A	C	SNP	1	6638031	1	5127008	CCAACGATGCTACACTTGTAGAGAACGGAGTGATC[A/C]GAAGAGATGTACAGAGCTAGGGCTTGTTCTGCGTC
Y	AX-166520366	Affx-88813060	AX-89818587	Affx-88813060	T	C	SNP	1	6638864	1	5127839	ACGGTGGTTGCCTGAAGTAGTTTCCTGTTCTTCGG[C/T]GAAACCCATTTGGGAAACATCTCTGCCTTTTTACC
N	AX-166520367	Affx-88813062	AX-89818588	Affx-88813062	T	C	SNP	1	6647364	1	5136341	CGTTTGTCTGTTCTTCCTTGGGCTGTAACTGTGTT[C/T]GAATGGTTTTCCTGAGGTTTGCGGATATAAATTAA
N	AX-166510948	Affx-88813063	AX-89818589	Affx-88813063	A	G	SNP	1	6647508	1	5136485	AACTGCCGATGAGCCTGTACAAACAATGTGCTTTG[A/G]TACCCTTCAAATCGGCAATTGAGGAATACAGCACG
N	AX-166520368	Affx-88813063	AX-89818589	Affx-88813063	A	G	SNP	1	6647508	1	5136485	AACTGCCGATGAGCCTGTACAAACAATGTGCTTTG[A/G]TACCCTTCAAATCGGCAATTGAGGAATACAGCACG
N	AX-166517610	Affx-88813068	AX-89847114	Affx-88813068	A	C	SNP-SNP	1	6650871	1	5139847	TCACTGATGGTGGTGAAGTTCCCACTACCATCAGC[A/C]GATACTGTCAACACTTCACTCGGGTCATATTCGTC
N	AX-89875730	Affx-88813070	AX-89818594	Affx-88813070	A	G	SNP	1	6656211	1	5145188	GATGAAATCAACAGTGCCGCTGATTTTGCAGTCTC[A/G]GTAGAACTGGCGCATAGAGTGCGTGTATAATGTGT
N	AX-89875732	Affx-88813073	AX-89818596	Affx-88813073	T	G	SNP	1	6657397	1	5146375	TTGATTAACCAGTGTAGCACTCAGCCATGTTCTCA[G/T]ATCAGAACTTAAATTCCCAGTGCTGTTATGTTTAC
N	AX-166510949	Affx-88813081	AX-89818599	Affx-88813081	T	C	SNP	1	6674289	1	5163276	GTCCTTTTTGGTTAACCACCAGGATGCTGCTCCAC[C/T]CACCAGGACATCAAAGAGGGTCTTCCAAGTATATG
N	AX-166510950	Affx-88813082	AX-89818600	Affx-88813082	A	G	SNP	1	6674693	1	5163680	TCCTTCTCTTTGGCAGTGAATTGTATGTATTGGGA[A/G]AAAAGGTTTCCTCGATTATTGAGTACCAAGCAGTT
N	AX-166520369	Affx-88813082	AX-89818600	Affx-88813082	A	G	SNP	1	6674693	1	5163680	TCCTTCTCTTTGGCAGTGAATTGTATGTATTGGGA[A/G]AAAAGGTTTCCTCGATTATTGAGTACCAAGCAGTT
N	AX-166520370	Affx-88813083	AX-89818601	Affx-88813083	A	C	SNP	1	6675291	1	5164278	CACTTACTCCATTGTATGAATACATTTCTCGCATG[A/C]GAAAATTTGATGACTCAGAGTAAGTCTCAGATCCA
Y	AX-166510951	Affx-88813084	AX-89818602	Affx-88813084	A	G	SNP	1	6675627	1	5164614	TGACAGGTATCTCTCAGTGGTCACTTGTTTGATCA[A/G]TTTCTGATAAATGAGGCCTTAGATATTATTGAAGC
N	AX-166520371	Affx-88813084	AX-89818602	Affx-88813084	A	G	SNP	1	6675627	1	5164614	TGACAGGTATCTCTCAGTGGTCACTTGTTTGATCA[A/G]TTTCTGATAAATGAGGCCTTAGATATTATTGAAGC
Y	AX-123357121	Affx-88813086	AX-89780402	Affx-88813086	T	C	SNP	1	6676011	1	5164998	TTTGACTTCTCTTGCCAATCCAAATGAAAATCAAG[C/T]GTTAAAGCAAGAGGCAAATAGAATTTCACTGAGGG
N	AX-166510952	Affx-88813088	AX-89818603	Affx-88813088	A	G	SNP	1	6676249	1	5165236	TTTGAGGAGAACATTGATGTTCAAGTTACTGTTGC[A/G]TCTCTCTATCTAAAGGATGCTGAAGAGGTATGTAT
N	AX-166520372	Affx-88813088	AX-89818603	Affx-88813088	A	G	SNP	1	6676249	1	5165236	TTTGAGGAGAACATTGATGTTCAAGTTACTGTTGC[A/G]TCTCTCTATCTAAAGGATGCTGAAGAGGTATGTAT
N	AX-166510953	Affx-88813096	AX-89818606	Affx-88813096	A	C	SNP	1	6683863	1	5172852	TGCCGCTCAAAATTTCCAGGTTGGACGCTCTTGGC[A/C]TCTTCATCAATGAGTCCGAATATGTATATGTCAGG
Y	AX-123360210	Affx-88813103	AX-89818610	Affx-88813103	A	G	SNP	1	6686237	1	5175224	AATTATGTGGACATTTTCCGGGCATTCTGAAGCTA[A/G]TCTTGTCCGAATGGTGAGCACAAACACCGATATTT
N	AX-166503019	Affx-88813105	AX-89780406	Affx-88813105	T	C	SNP	1	6691113	1	5180102	CGCAGCATACAAGTTTTGTAAGCAAAGGATAGAAG[C/T]CTCTCAGATGTCTTCTGAAAATCTGTGGGTTCATA
N	AX-123366838	Affx-88813107	AX-89904288	Affx-88813107	A	C	SNP-SNP	1	6691437	1	5180426	CGCTAATCCTTCAACATTCTCTTCAGCGCTTGAAT[A/C]AATAGTTTCTGCAAGTCCCTCTTGATTGGCAGGAA
N	AX-89875747	Affx-88813108	AX-89818614	Affx-88813108	A	C	SNP	1	6691950	1	5180939	AGAAGTAATAATTGAGTAATGCATTTGCCCCTACA[A/C]GTTCCCAATACAGAGCTTTCCTCCTCATCTTTGAT
N	AX-166510954	Affx-88813109	AX-89818615	Affx-88813109	T	C	SNP	1	6691976	1	5180965	GCCCCTACAAGTTCCCAATACAGAGCTTTCCTCCT[C/T]ATCTTTGATATCAGGTTCAGCAACATCAGCAACCT
N	AX-166520374	Affx-88813109	AX-89818615	Affx-88813109	T	C	SNP	1	6691976	1	5180965	GCCCCTACAAGTTCCCAATACAGAGCTTTCCTCCT[C/T]ATCTTTGATATCAGGTTCAGCAACATCAGCAACCT
N	AX-89780408	Affx-88813112	AX-89780408	Affx-88813112	A	G	SNP	1	6695009	1	5183998	CCACTACAGAATCGCTGGGAAGCTGAACACTATTC[A/G]CAAATACTTGCTCAGAAGGTTTTCCTGCCAATTCT
Y	AX-89818617	Affx-88813114	AX-89818617	Affx-88813114	T	C	SNP	1	6696611	1	5185600	AACTTATTTGATCTTAGATACTCTACACCCTTTAC[C/T]GGTCGCCTGTTGAACTGCAACATATTAAATCAACA
N	AX-89875750	Affx-88813114	AX-89818617	Affx-88813114	T	C	SNP	1	6696611	1	5185600	AACTTATTTGATCTTAGATACTCTACACCCTTTAC[C/T]GGTCGCCTGTTGAACTGCAACATATTAAATCAACA
N	AX-123357122	Affx-88813118	AX-89780409	Affx-88813118	A	C	SNP	1	6699679	1	5188669	TTATTGTCAACACAACTGCAAACCCTGTTTAAAAT[A/C]TCAGTGAACACCGGAACACTTTTGTCGTCTAAACC
N	AX-166503020	Affx-88813120	AX-89780410	Affx-88813120	T	C	SNP	1	6706024	1	5195015	GCTGTTTGAAGTAGAAGGTTTGCTTTTTACAACGG[C/T]TTCTGTTTTCTTTGCTTTTGGAGACTGGGGGAGCG
Y	AX-166510955	Affx-88813121	AX-89818620	Affx-88813121	T	G	SNP	1	6706252	1	5195243	GCATTCTGCACTTACACTCTAAAACTGCTGAAGCA[G/T]GCTGAGACTGCATAGTTGGTTTAGTCTTTGGATCT
N	AX-89818621	Affx-88813123	AX-89818621	Affx-88813123	A	C	SNP	1	6707464	1	5196455	GAGGAGCCGTTAAAACAATCACTGCAAACTCTAAC[A/C]GGTGAGTAAAGGCCAAACTGAGGTAGAGCCTGAAT
N	AX-166520375	Affx-88813124	AX-89818622	Affx-88813124	T	G	SNP	1	6711431	1	5200663	AAGAGTAGTGGCAACAGCTGTCCTCCAAGTCCACA[G/T]ATACAAACTGGGTCAAATTCTCTTCAAAATTCTTC
Y	AX-166509143	Affx-88813126	AX-89803328	Affx-88813126	A	ATGC	Indel	1	6713279	1	5202514	GGTACTAAATTGTCTGATAAAATATAAAGTTCACA[-/TGC]TATGGTACAATGATTATCCGATGATGCAGTTACGA
Y	AX-166510956	Affx-88813129	AX-89818624	Affx-88813129	A	G	SNP	1	6714881	1	5204116	GTTTCGATGCAGCTCATATCTTGCTGCTGTCATTG[A/G]AGGAACCTATTACTTAGTTGCAACTTCTTCCTTTC
N	AX-89875759	Affx-88813134	AX-89875759	Affx-88813134	T	C	SNP	1	6717186	1	5206449	GATTCCGGGTGATGTGCTGTGGTCGGATCCTTCAA[C/T]GAAACCTGGCCTTTCTCTGAATGAGGATAGAGGTA
N	AX-166503021	Affx-88813135	AX-89780412	Affx-88813135	T	C	SNP	1	6717522	1	5206785	TTCTGCATTGTTAAAACACCAGTTGATTATCAGAT[C/T]GCATGAAGGCCCTGATGCATGTGATAAGAGGCCAG
Y	AX-123524266	Affx-88813136	AX-89818626	Affx-88813136	T	C	SNP	1	6717644	1	5206907	GGAAGCTTATTACCTTATTTAGTGCTCCTGATTAC[C/T]CACAATTTCAGGTGCTCCTAATACTTATTCCTTGA
Y	AX-123360212	Affx-88813137	AX-89818627	Affx-88813137	T	C	SNP	1	6718485	1	5207748	TGAGGAGTTGGACATGGATAAAATGACAAGCAGCT[C/T]GTGAAGGTATATCATCATTTGGTGTTCATTGCAAA
N	AX-166510958	Affx-88813143	AX-89818634	Affx-88813143	T	G	SNP	1	6804938	1	5301123	TTTTTCAAGTAGCAAATATCTCACCTTTTTGAAAG[G/T]TGTGACACCCCATGGATTGTCAGGATTCTCAGGAT
Y	AX-166520376	Affx-88813145	AX-89818635	Affx-88813145	A	C	SNP	1	6808494	1	5304679	CTTCTTTTCCATTCACCTCATTCTCCAACTCTTTC[A/C]CATTCTTTTCTTCAGCTTTTACATCTGAAAATCCA
N	AX-166503024	Affx-88813148	AX-89780421	Affx-88813148	T	G	SNP	1	6812304	1	5308574	TGGACACATCTTGACAGTTTTTCGGGTGACAAATG[G/T]TCTTACTCTGCCATCGCATTATGTTCTGAAGCGCT
Y	AX-166520377	Affx-88813155	AX-89818639	Affx-88813155	T	C	SNP	1	6816542	1	5312812	GGGACTATCATAAACAGCACAAGCAACCCAAATAC[C/T]CTGAAAACAAGATGTTCAGCAGAAGATGAGAAACA
N	AX-123363525	Affx-88813157	AX-89847117	Affx-88813157	A	C	SNP-SNP	1	6818918	NA	5315188	TCAAAATATATAACATAATGCATAGTTAGTTTGCT[A/C]GCTGTAATTGAACATTGAGAAGGTTACAGAAACTG
N	AX-166503025	Affx-88813158	AX-89780425	Affx-88813158	T	C	SNP	1	6820400	1	5316670	TGCTGCTTTGGTTTAGAGAAACTTTCTCGATATCT[C/T]TTTGAGTCGAAACAGAAACATACTCCCCCACGGCC
N	AX-166510959	Affx-88813159	AX-89818640	Affx-88813159	T	C	SNP	1	6820641	1	5316911	TGTTTTATAGTCTTGGCCAGTGCTTACAGGAAGCT[C/T]GTGCTCAACACAGGTTTCAACAGAAGCCATGGAAA
Y	AX-166503026	Affx-88813165	AX-89780427	Affx-88813165	A	G	SNP	1	6828998	1	5325238	ATCCCTTCAGCAATTATTGGAAGGAGGACAGGAAA[A/G]CATCTTCTATCTTATATTAATCGCACACGGTTAGT
N	AX-166510961	Affx-88813171	AX-89818644	Affx-88813171	A	G	SNP	1	6838096	1	5334340	GTTACCGGGAATTGAAGAAAGCCACCAACAACTTC[A/G]ACGACAAGCATAAATTAGGTCAAGGTGGGTTTGGG
N	AX-166520378	Affx-88813171	AX-89818644	Affx-88813171	A	G	SNP	1	6838096	1	5334340	GTTACCGGGAATTGAAGAAAGCCACCAACAACTTC[A/G]ACGACAAGCATAAATTAGGTCAAGGTGGGTTTGGG
N	AX-123357123	Affx-88813177	AX-89780431	Affx-88813177	T	C	SNP	1	6843705	1	5339960	GGATCATTCACGATTGCCCGAACTCTTGATGCATA[C/T]CTGAATCAACACAAAGCGATGAGTTGTTTTACATA
Y	AX-89818647	Affx-88813180	AX-89818647	Affx-88813180	T	C	SNP	1	6844366	1	5340621	GACTGTGTCTGAAGATTGGTACTTTCAATAATAAC[C/T]GACACTATGAGATGAGATCTTGAACTTTCTTGATT
N	AX-123357124	Affx-88813185	AX-89780433	Affx-88813185	A	G	SNP	1	6847266	1	5343521	TTTATATGTGTTTGAAGAGCAACACAAATTTCCTC[A/G]CCCTGTGTGAAAAGGAGAAACACAATTAAGTAAAA
Y	AX-166503027	Affx-88813188	AX-89780434	Affx-88813188	A	G	SNP	1	6849993	1	5346250	ACATAGAATGTAGTTACCCTCTGGAAGCACAGCAT[A/G]TCCTCAAAAGTGAACTTTTCTCGGGGTTGAGGACC
N	AX-166509144	Affx-88813190	AX-89803329	Affx-88813190	T	TATTA	Indel	1	6850923	1	5347181	TCATATCAAAGCATTTCCAATCAAACTCACAACCT[-/ATTA]ATTTCTTGAAACCAAACATAACAACCAAAAACTAA
N	AX-166510962	Affx-88813192	AX-89818652	Affx-88813192	A	G	SNP	1	6868818	1	5365310	CCACCTGCTTCATTTTAGGAATGTCAAATTTCATC[A/G]GCTCACCAATAAATATCTTGATTTCCTTATTAAGC
Y	AX-166510964	Affx-88813196	AX-89818654	Affx-88813196	T	C	SNP	1	6876540	1	5373032	TCAATTATCTCATCTTCTGTTTGCATTCTTTTAAG[C/T]TGAACCAACATTTCAAGCTTGGCTTTCTGGATTTC
Y	AX-166517611	Affx-88813198	AX-89847119	Affx-88813198	T	G	SNP-SNP	1	6879679	1	5376171	GCTTTGACTAAAGACTTTGAATTCTCCAAAACAAA[G/T]CTTGACAACACACTCTGCTGGAGATGAAAGTATTC
N	AX-123363526	Affx-88813208	AX-89847121	Affx-88813208	C	G	SNP-SNP	1	6909292	1	5406071	GCCGCAATCTAGGAGCATACAAGGAATTTTCTGTT[C/G]ATGGTCAATATGGACTGAAAACACGAAGTGTTCTT
N	AX-166510965	Affx-88813218	AX-89818662	Affx-88813218	T	G	SNP	1	6936306	1	5433192	GAGCAATTGCATTTCAAAATTGCAACTTTGTTATT[G/T]CATGGTGGAAAGATTATGGAAGCAGTTACGTGGTT
N	AX-123357125	Affx-88813225	AX-89780443	Affx-88813225	A	G	SNP	1	6937912	1	5434798	TTTCTACAAATAAATGGCTCCGCTTAACATATGAC[A/G]TCAAATCTGGTATGCAACCCCGAGTATTCTGTAAT
N	AX-166503029	Affx-88813233	AX-89780449	Affx-88813233	A	C	SNP	1	6942906	1	5439798	GTGCTCAAAATGGACTCTAAAGGTAGACCAGCAAG[A/C]AATGACTTGGATTGAGGATCATCCATCAAAGATCT
Y	AX-166510966	Affx-88813243	AX-89818673	Affx-88813243	A	G	SNP	1	6949589	1	5446482	TACACCATCTCTTACAACCCAAGTACCCAAAAGAC[A/G]GAGCAACTTTGTTTTGGTGAAGGGCTTCATTTGGA
N	AX-166520379	Affx-88813243	AX-89818673	Affx-88813243	A	G	SNP	1	6949589	1	5446482	TACACCATCTCTTACAACCCAAGTACCCAAAAGAC[A/G]GAGCAACTTTGTTTTGGTGAAGGGCTTCATTTGGA
N	AX-166510968	Affx-88813256	AX-89818678	Affx-88813256	A	G	SNP	1	6982459	1	5478658	TTGAGAGAACTGGATGTGAGTTTCAATGAGCTTGA[A/G]TCAGTGCCTGAGAGCTTATGTTTTGCCACCTCGCT
N	AX-166520382	Affx-88813256	AX-89818678	Affx-88813256	A	G	SNP	1	6982459	1	5478658	TTGAGAGAACTGGATGTGAGTTTCAATGAGCTTGA[A/G]TCAGTGCCTGAGAGCTTATGTTTTGCCACCTCGCT
N	AX-166509639	Affx-88813265	AX-89806529	Affx-88813265	T	TTGC	Indel	1	6991772	1	5487973	AGATTAAACACCTTGAAAACAACTAAACAATAATT[-/TGC]TGGTCACAAAGTGAACAAATGTCTCTCCCAAATCT
Y	AX-166519001	Affx-88813267	AX-89862742	Affx-88813267	G	GTATA	Indel	1	6991841	1	5488042	TGCTTACACAACAAATTAATGTTGATAGTAATTAG[-/TATA]TATCAACTGACTTCATACAGAAATTTTAACACAAT
Y	AX-166503030	Affx-88813268	AX-89780461	Affx-88813268	A	G	SNP	1	6996801	1	5493006	GGTAATCCTGGTCGCTAATATATTTTCTGATCAAC[A/G]TCGCATGGAACTGGTATATGTAGCGCCTCCCAGTT
Y	AX-89875814	Affx-88813270	AX-89818680	Affx-88813270	A	G	SNP	1	7000871	1	5497081	TTGGCAAGGCTGCTAGATGGTTTTGGGATTGGACT[A/G]GCTGTTACTCTTGTCCCGGTCTACATTTCCGAAAC
N	AX-123357129	Affx-88813277	AX-89780463	Affx-88813277	T	C	SNP	1	7010009	1	5506219	GCTCGTGATAATCTTGTTCAAGAGAATGGAACCAG[C/T]AGTGCTAATGGGGAGCCGCATACCTCTACATCAAT
Y	AX-123366840	Affx-88813278	AX-89904293	Affx-88813278	T	C	SNP-SNP	1	7010339	1	5506549	GTAACTGGCTATTGATATCCAAGTAAATCCTGCAA[C/T]CCTGAGTTTCCCACTTGCTGGTGACTTGTTGGAAT
Y	AX-123364861	Affx-88813285	AX-89872291	Affx-88813285	T	C	Indel-SNP	1	7035775	1	5532043	ACATTTGATGACATCATTTCATGGTAGGCTACACT[C/T]GTATGAATTTCCCATTTTCTTGAACCTTTCGGATT
Y	AX-166510119	Affx-88813288	AX-89811082	Affx-88813288	C	G	SNP-in-Insertion	1	7036258	1	5532526	GAAGTTGGTGACTTGGTGCTAACAAATTTTCACTT[C/G]GTTGGTACTGCAGCTTGGTGGTTTCTTCATTTGGA
N	AX-166520383	Affx-88813292	AX-89875819	Affx-88813292	A	C	SNP	1	7037535	1	5533803	ATCTTCCTGTGGACATACTTGGTCTGTGCCCTAGC[A/C]CTCACTGTGTGGTCTACTGTCTACATGTGGATCTT
Y	AX-123359843	Affx-88813293	AX-89815292	Affx-88813293	T	C	Indel-SNP	1	7037612	1	5533883	TGTTGAGGATGGCAAAAAGCTTCCTCAGAAAGTAG[C/T]ATGTAGCATCATTTTTCGTTAGCAATTCGCACGCA
Y	AX-123365095	Affx-88813294	AX-89818688	Affx-88813294	A	C	SNP	1	7039590	1	5535858	TTTTGTATACCCAGAGATGCAGCAAGCAATCTGTG[A/C]ACTATGACATCTGTAGAAAAACATACTTCTCAAGT
N	AX-89818692	Affx-88813299	AX-89818692	Affx-88813299	A	G	SNP	1	7045364	NA	NA	ACAAGTTCCTGTTCTTGACCTCCTCGAGCACAATC[A/G]AAAGCACCACCACGTCGTTAATGGCTGCATTCTCA
Y	AX-166517612	Affx-88813300	AX-89847124	Affx-88813300	T	C	SNP-SNP	1	7049631	1	5545845	CCCGCGCTTCGCCGATCGCAGCCGAACCACATCGT[C/T]GGCATCTCCCGCTCTCCCGGCCGATCGCTCCTCTC
N	AX-89780468	Affx-88813306	AX-89780468	Affx-88813306	A	G	SNP	1	7051230	1	5547444	CTAGCTCATCATGATATGGCTTTTAAAGAAATTCA[A/G]AATCTTATTGCATCTGACCGACATCCAAACATAGT
N	AX-166503031	Affx-88813319	AX-89780474	Affx-88813319	T	C	SNP	1	7072778	1	5569307	CCATATGGTAACTCATTTAGTGCAGCTTGAAAGAC[C/T]TCAATGCAGTAACCAGTGATATCAGTGCCTTTTAC
N	AX-166510969	Affx-88813320	AX-89818699	Affx-88813320	T	C	SNP	1	7072827	1	5569356	CAGTGATATCAGTGCCTTTTACACCTACAAACTCG[C/T]GGTAGCTGACTCGATTGGGGACTCCAATCCTGAGC
N	AX-89780475	Affx-88813321	AX-89780475	Affx-88813321	T	C	SNP	1	7074400	1	5570831	GTTCAATACATCAGGTCTTGTGGTGACATTAGTAA[C/T]GAGTCCACTAGAGTGAGAACTATTACAGAAAACCA
Y	AX-166510970	Affx-88813322	AX-89818700	Affx-88813322	T	C	SNP	1	7080114	1	5576545	ACTAGAAGCGCTTTTGTGAAGGCTGATCATGCAAT[C/T]GCAGATGCTACCTCTCTTGACAAGTCCTCTGGTAC
N	AX-89875828	Affx-88813322	AX-89818700	Affx-88813322	T	C	SNP	1	7080114	1	5576545	ACTAGAAGCGCTTTTGTGAAGGCTGATCATGCAAT[C/T]GCAGATGCTACCTCTCTTGACAAGTCCTCTGGTAC
Y	AX-89818701	Affx-88813323	AX-89818701	Affx-88813323	A	G	SNP	1	7080494	1	5576925	TATGATGGATACCTCAATGGCCAACTATCAGTGGC[A/G]CGTGCTCTTGGTGACTGGCATATCAAGGGCTCCAA
N	AX-166503032	Affx-88813329	AX-89780476	Affx-88813329	T	C	SNP	1	7088173	1	5584604	GCAGCTCAATTTGCTCAAGCTGCTCTCCATGAGAT[C/T]CAAATTCTTACAGCTATTGCGGAAGGGGACTCCTC
N	AX-123360218	Affx-88813330	AX-89818703	Affx-88813330	A	G	SNP	1	7088378	1	5584809	TTAAGTTGGATAATGTAAGGGAGATCTGCAAATGT[A/G]TATTGATGGGTCTGGATTATTTGCATAGAGAAGTT
N	AX-86821585	Affx-88813334	AX-89780478	Affx-88813334	A	G	SNP	1	7092033	1	5588464	TTTTTGTACATGTCAAGGATGGTGTCTTCAAAATC[A/G]AGCTTACCTGCCACAGCATGACCATTGCAAGCAGG
Y	AX-89780480	Affx-88813338	AX-89780480	Affx-88813338	A	G	SNP	1	7097311	1	5593697	CGTTTCTAGTAGAACCTGCTTGTCATGGAGCTGAT[A/G]TACGAAGAGAAGGTCGAATGTGGGAGGAACATGAC
Y	AX-89780481	Affx-88813340	AX-89780481	Affx-88813340	A	G	SNP	1	7097774	1	5594160	CATGATACTGACTATTCATTTAAACCACGGGATCA[A/G]AGTCTTGCTAAATGTATTCTCAGAACAACCCTGAA
N	AX-166503033	Affx-88813341	AX-89780482	Affx-88813341	A	C	SNP	1	7098097	1	5594483	GTTTACAGAAAGTGGGATTAAATGTCATAATGATT[A/C]CATTGGGAGTAAGAGAGTGTGGGAGGGCTCTTGCA
Y	AX-166503034	Affx-88813345	AX-89780483	Affx-88813345	T	C	SNP	1	7106634	1	5603020	CTGCTCGATGCAAACATTTTGTCTTCTTTAATGCC[C/T]TGTGGATCCAAGAAATGCAGGTCAGAACTCATCTC
N	AX-166520384	Affx-88813346	AX-89818708	Affx-88813346	T	C	SNP	1	7106832	1	5603218	GCATTGTTGGATGTTGCATTCTGTTGCTTCCTCTT[C/T]GATCGAGCACGCCTGTTCTGAAACCAATTATAAAC
N	AX-166519462	Affx-88813348	AX-89867536	Affx-88813348	C	G	SNP-in-Insertion	1	7108125	1	5604513	CTGGTGCTGCTTATCCCACTCCATCATAAACCTCT[C/G]TTTCTTTCTTTCTGCTTTCACTCTCAGTCTTTGTG
Y	AX-123524272	Affx-88813352	AX-89818711	Affx-88813352	T	G	SNP	1	7112072	1	5608458	AGAAGAAGCTTCCCAAATGATGTTCCGGATACTGG[G/T]GCAGATAAGGACCTAATGAGATTTCTAGGGGACAA
Y	AX-166503035	Affx-88813353	AX-89780485	Affx-88813353	T	C	SNP	1	7112275	1	5608661	TACTTTGAACCTTTCATAGTCTAGTGCAGATGACC[C/T]GTAGCTGCCAGAAGAAAATACAGGAGAATTAAATC
N	AX-166520385	Affx-88813354	AX-89875840	Affx-88813354	A	G	SNP	1	7113185	1	5609571	TGATCTTCACACCATCCAGCATCCTCTGTGCCATT[A/G]TTTTGATAGAATGAATTGAGATCCAACTCTCTGGA
N	AX-166503036	Affx-88813357	AX-89780487	Affx-88813357	A	G	SNP	1	7120911	1	5617298	ACAGGAGATTGACTCAGTTTATCTTGCATAATGAA[A/G]ATGGTATTGTACAGCCACTTGAGATGGTGCAACAT
N	AX-166503037	Affx-88813358	AX-89780488	Affx-88813358	T	C	SNP	1	7121336	1	5617723	AGTGCTTCTATCAAAGAATTTATCATTTCTCAAGG[C/T]GTGTTTATATATAATCAATTGGAAGGTTTGGAGGA
N	AX-166503038	Affx-88813360	AX-89780489	Affx-88813360	A	G	SNP	1	7121663	1	5618050	TCCATGTCAAAGAAATTTTACATCAAAATTAATGA[A/G]GATGAAATTGCTAATGATTATCCTGAACCTGCCTA
N	AX-166510971	Affx-88813362	AX-89818713	Affx-88813362	A	G	SNP	1	7121850	1	5618237	TTTCGCTGGAGCTTCTTCCAATGAAGGCTTGTGCT[A/G]ATATTGATGTTACGATTTTTGGTTCTGGGGTTATG
N	AX-166510972	Affx-88813365	AX-89818715	Affx-88813365	T	C	SNP	1	7122917	1	5619304	TACATGTATGAATCATCAGATGGAGAAAAAATGCT[C/T]CATGGCAGAATGATGCAGCGAGGATCTGATACTGT
N	AX-166520386	Affx-88813373	AX-89818719	Affx-88813373	A	G	SNP	1	7124840	1	5621227	AGAGGGAACATGGCTGTTTTGACTGATCACATTTC[A/G]AAAGAAATGAACGAGCTGAACCTCATTCGGTGCAA
N	AX-166510973	Affx-88813374	AX-89818720	Affx-88813374	T	C	SNP	1	7125122	1	5621509	ATGTGCTTCCATCCCGACCAGGACAGGATTATTAC[C/T]GTTCGAGAATGTGCTCGTTCTCAAGGCTTCCCTGA
Y	AX-166519002	Affx-88813375	AX-89862744	Affx-88813375	T	TGCA	Indel	1	7127555	1	5623943	TTCAGAATTTTGTTTATGATTAATTAATTACAAAT[-/GCA]GCAGCTAAGGTCTAGAATGTTACACTCATTGTTTG
N	AX-166520387	Affx-88813376	AX-89818721	Affx-88813376	A	G	SNP	1	7128355	1	5624742	AACTGTTTTGGCAGGTATGTTGGAGATTCTGTTGG[A/G]AATGTTTCAGTTTTGAAGCTTGAGCAAGAATCATG
N	AX-166503039	Affx-88813379	AX-89780491	Affx-88813379	A	G	SNP	1	7130008	1	5626395	TCTCGACTTCTTGTTTCTGGAGATCAGAGTGGAAC[A/G]GTGAAGTACCATCTTTGTTCTGTTTATTGATTATT
Y	AX-123357130	Affx-88813383	AX-89780492	Affx-88813383	T	C	SNP	1	7131472	1	5627859	ATCAATATTTTCATCCTTGCACAGGTGAACAGTGA[C/T]CAGGAAATCTTTCTCTTCTCTCTTTCACTCCAGAA
N	AX-166520388	Affx-88813384	AX-89818723	Affx-88813384	A	G	SNP	1	7131656	1	5628043	CCTCATTCAAGGCTTTTAGACTCTTTCAACTTGAC[A/G]TACCAGAAAGATCTGATGGTTTCACAAGAAGAGCT
N	AX-123357131	Affx-88813390	AX-89780497	Affx-88813390	T	C	SNP	1	7142493	1	5638884	AATTATTAACAAAAGATAAGCCCAGAAACTCACAG[C/T]ATCAGACAACGATTTCCATTTCTCACCACCAGCTT
N	AX-166510974	Affx-88813401	AX-89818726	Affx-88813401	A	G	SNP	1	7167465	1	5663583	CTCCTTCTCACCATCTTGGTGGATTCGAAGACGGC[A/G]ATGTCCTCTTGCACCAGTTTTTATCAACTGCTGGG
Y	AX-166520389	Affx-88813401	AX-89818726	Affx-88813401	A	G	SNP	1	7167465	1	5663583	CTCCTTCTCACCATCTTGGTGGATTCGAAGACGGC[A/G]ATGTCCTCTTGCACCAGTTTTTATCAACTGCTGGG
N	AX-123365096	Affx-88813402	AX-89818727	Affx-88813402	T	C	SNP	1	7167717	NA	5663835	GATGTCCAAAGCGTTTAAATTTCTTTTGTTAAATG[C/T]CATCTTATCAACCCTGGGTTCACTTATAAAATCCA
N	AX-166509145	Affx-88813404	AX-89803336	Affx-88813404	T	TTAA	Indel	1	7169264	1	5665383	ACAGGTGCTTGTGGAGCTGCAGTTGGGTTAAGACT[-/TAA]GACTAAAGGAAAGGGTTATATAGATAGATATCTCC
N	AX-166510975	Affx-88813407	AX-89818729	Affx-88813407	A	G	SNP	1	7173012	NA	NA	AGGGTCTTCCTCAGTCAATTTTTTAACCACATCAA[A/G]GTGATTGAACCGCACTGCCTCATGCAAGGCTGTGT
Y	AX-166503040	Affx-88813410	AX-89780501	Affx-88813410	T	C	SNP	1	7181900	1	5677991	AAGCCATGGATCTTTCCGAACAAACTCTTCTACTT[C/T]ATATTTCTTACTGTGAATTGCGTAATGAAGCGCAT
Y	AX-166520391	Affx-88813411	AX-89875857	Affx-88813411	T	C	SNP	1	7182608	NA	NA	TTTTTCGGCAGCAATGTAGAGTGGAGTTTCGCCAG[C/T]ATCATTAGCAGAGTACAAAAACTCAGGGTCTTCCC
N	AX-123524273	Affx-88813413	AX-89818733	Affx-88813413	T	C	SNP	1	7182954	1	5679045	ACCTGGGCTGACTTCAGCAGTAGTTCCTCAGATTT[C/T]GTCAACAATGCACCGCCTACTCTTGCTATATAGAC
N	AX-123524274	Affx-88813414	AX-89818734	Affx-88813414	A	G	SNP	1	7183184	1	5679275	CCAATCAGAACTAAACAAGGCGTTGGTCACCTCCA[A/G]TATCATGGCATGGTACGAAGCCGATGTTGGATCAC
N	AX-166519630	Affx-88813416	AX-89869496	Affx-88813416	T	G	Codon-based	1	7190883	1	5686985	AGGTCTTTGCTATTTAGAAGGACGCTACTAAGCCA[G/T]GGATCTTTTCGAACAAACTCTTCTACATTTGGTTT
N	AX-166527740	Affx-88813419	AX-89904296	Affx-88813419	T	C	SNP-SNP	1	7208153	1	5704256	ACGATAACCACGATAAGCACCTATCTCTTCCATTT[C/T]CGTTCTGAGAATTCTCTGCAACAAAAAACAAGTAC
Y	AX-166520392	Affx-88813420	AX-89875862	Affx-88813420	T	G	SNP	1	7208332	1	5704435	AGTTTTCCTTGTTGAATGCCATCTTATCAACTCTG[G/T]CATCACTTATGAAATCAGTGGCTTCCTTGTAAGGA
N	AX-166510977	Affx-88813421	AX-89818735	Affx-88813421	T	G	SNP	1	7208371	NA	NA	CACTTATGAAATCAGTGGCTTCCTTGTAAGGAGAA[G/T]AAGCAATGTCATGGAGGGGCGTGTTTCTGCCAACA
N	AX-123363528	Affx-88813422	AX-89847129	Affx-88813422	A	C	SNP-SNP	1	7209487	1	5705591	GTTGTTGGTGGGAGTCAAAATTTGGTGGAGAATGT[A/C]CTTGTGTTCCTTAAGGGCGTCAATGTTGCCTTGTG
Y	AX-166510978	Affx-88813424	AX-89818736	Affx-88813424	T	C	SNP	1	7209573	1	5705677	TGTTTAGATCCATGCCCTTCAATATCTTGGTCTCT[C/T]TGGTTGTTGTTGCAGCTTCAAGCGGCGGAGGCTGG
N	AX-166503042	Affx-88813430	AX-89780507	Affx-88813430	A	G	SNP	1	7219770	1	5715881	TTTTTTTAATGTTTCAGAGTTGATTAGGAGCTTGC[A/G]TGTGTATGGATTAGAGGATGGGAAGGAAAATGAGG
N	AX-166503043	Affx-88813432	AX-89780508	Affx-88813432	A	G	SNP	1	7220704	1	5716815	AGAAGTCGGATGAGGAAACAAGCCAAGGGAATGAT[A/G]GGAATTACTGTCAACTAAGAACAAGTTTACCTATG
Y	AX-166520393	Affx-88813433	AX-89818739	Affx-88813433	T	C	SNP	1	7221467	1	5717578	CGGTGGCCACATAGGAAGATAAAATCGCTTGACAG[C/T]CTCATCCGTGATCTTCAGGTCCTTCCTATGTTCAT
N	AX-89818742	Affx-88813437	AX-89818742	Affx-88813437	T	C	SNP	1	7225453	NA	NA	TTGATCATCTCAATGCAATTGTCACCAATAATCTT[C/T]TTTCTTCCCATGTTTACTAAAGAATTATAAAGTAT
Y	AX-123364722	Affx-88813440	AX-89867537	Affx-88813440	T	C	SNP-in-Insertion	1	7231676	1	5729027	TCAACTCCCTGCTAAACCAACCCATCAGTTTCTTC[C/T]GCTGAACTCTTCTTCTTCTTAGGCTCTTACTTTCC
N	AX-166503044	Affx-88813442	AX-89780510	Affx-88813442	T	C	SNP	1	7235964	1	5733313	AATGGAAGAAAGGTAAATGGTGTGATTCATGGAGT[C/T]GAAGAGGGAAGGAAGGTTAATGGTGTGACTGAGAC
N	AX-123363529	Affx-88813449	AX-89847133	Affx-88813449	A	G	SNP-SNP	1	7242649	1	5739999	TACATTGCTAATTTTAGCATACATATAAGCATGTC[A/G]GATATCCATATCTTATAAACATAGATCCACACCAA
N	AX-166520395	Affx-88813468	AX-89818749	Affx-88813468	A	G	SNP	1	7270319	1	5767679	ATATCTACTCCTTCCCTCTTCTGTGATCTTTCCAT[A/G]TTGCGAAGCTCAGTCTTCAACATCGTTTCCTACAT
Y	AX-166509640	Affx-88813476	AX-89806533	Affx-88813476	C	CAGA	Indel	1	7282953	1	5780288	CAAATCCTGGGACGTGAATGTAATTATCCAACTTC[-/AGA]TTCTTCACTAACCATCTTCAGATTTTGACTAACCA
N	AX-123357133	Affx-88813477	AX-89780523	Affx-88813477	T	C	SNP	1	7289362	1	5786700	AAGAGTGAATGGGATCCTATCAGTGTGAATTACAC[C/T]TCTGGCACAACATCAAGGCCGAAAGGGGTTGTCTA
Y	AX-123360223	Affx-88813478	AX-89818752	Affx-88813478	A	G	SNP	1	7289513	1	5786851	CTGTGCCTATGTTTCATTGCAATGGATGGTGCCTC[A/G]TTTGGGGTTTGGCTGCTCAGGGTGGCACTAACATT
Y	AX-166520396	Affx-88813482	AX-89818754	Affx-88813482	A	G	SNP	1	7290695	1	5788033	TCAGAGTAGTGGTCAATAGGTTCCCCTTCCAGATT[A/G]ACAGCCATTACACCAGAATTTTTCTCCATATGTGG
N	AX-123357134	Affx-88813489	AX-89780525	Affx-88813489	A	G	SNP	1	7298810	1	5799834	AGTGATATGAGCAGGGTGTTCTTCAATATCAAGCC[A/G]GATAATGTACGGATACAGAACAGAACCGCAGTAGA
N	AX-89780526	Affx-88813491	AX-89780526	Affx-88813491	A	G	SNP	1	7298934	1	5799958	TAGTGAGCAGTAGGTTCTCCGTCCAAATTCACAGC[A/G]ATTACACCGGAATTCTTCTCCTTATATGGACTGCT
Y	AX-123365098	Affx-88813495	AX-89875881	Affx-88813495	T	C	SNP	1	7302807	1	5803837	GAACTCACAGCCTCCCCACCAGAAATGATCATGTC[C/T]CTTGCCCTATCCTTCATTTGAATGTACCCATCTGG
Y	AX-123365099	Affx-88813497	AX-89818756	Affx-88813497	A	G	SNP	1	7302898	1	5803928	CAGTCATGTACCACCCACCCTTAAAAGGCTCATTC[A/G]CTGCTTTTGAATTTTTGAGGTACCCCAACATCAAA
N	AX-166520397	Affx-88813499	AX-89818757	Affx-88813499	A	G	SNP	1	7303492	1	5804522	TTGAATTCAGGTACGTAGCTCTGTGGCTGTACACT[A/G]CTCCTTTGGGATTCCCAGTTGAACCAGAAGTGTAA
N	AX-123614281	Affx-88813507	AX-89803343	Affx-88813507	T	TAAA	Indel	1	7317714	1	5838889	CCATAAAGGTTGGTTTATTGTTTTCTACACTCGTT[-/AAA]AAGGGTGTTAATCAGAATAACCTAAAGTTTTGGAG
N	AX-123614282	Affx-88813508	AX-89803344	Affx-88813508	A	ACTAC	Indel	1	7318981	1	5840157	CCAATGTACTCCTTCAGGTGGTGGTGGCTCACCAA[-/CTAC]TCCCTCATCACCAACCCCAAGTGGCGGTGGCAGTG
N	AX-123357135	Affx-88813514	AX-89780534	Affx-88813514	T	G	SNP	1	7332406	1	5853706	AAATTATTGTGAGATTATGTTCAATAGAGAAGCTC[G/T]TGTTTTGATCAAGCGCCTAAATACGCTTTCCAGAC
N	AX-89780536	Affx-88813521	AX-89780536	Affx-88813521	A	C	SNP	1	7350364	1	5871672	TCAGAAAATTCAGGTATCAAGTTTGATGAATCAGA[A/C]ACTGATGAAGAGATTGAAATGGAGGCACCTCCAAG
N	AX-166503045	Affx-88813523	AX-89780537	Affx-88813523	A	G	SNP	1	7361376	1	5882688	GAGTCTAAATACACTAGCCGAAAGAAGCAGCCATT[A/G]CCGTGGTGGCTTAGGTGCATTTCGAGAGCCATGTT
Y	AX-123360224	Affx-88813532	AX-89818763	Affx-88813532	A	C	SNP	1	7372889	1	5894233	ATTATCCAGGCTCTAAAGCAACAGGAAGATTTAGC[A/C]ACGGTCACAACGTCGCAGATTTCCTCGGTATTGAT
N	AX-166510980	Affx-88813533	AX-89818764	Affx-88813533	A	G	SNP	1	7373035	1	5894379	AATCAATTATTAGCACAGTTCCTGGGTTACAAGGA[A/G]AGCCCGCCACCTTTTCTCTCTCTTTTAAACAAGAA
Y	AX-166520398	Affx-88813534	AX-89818765	Affx-88813534	T	C	SNP	1	7373502	1	5894846	ATCAGCGTCGGAAGCAACGACATGTTTGAATTGTT[C/T]GCTGCCAATAAGTATAACCTAACGAAGAAAACCGA
N	AX-166503046	Affx-88813539	AX-89780541	Affx-88813539	A	G	SNP	1	7379989	1	5901333	AACTAAACGATCTTGCTCAAACATTTTTCATAAAA[A/G]CTCAGAATCTCCTGAAGAAATTGAGCTCGGAGTTG
N	AX-166503047	Affx-88813542	AX-89780543	Affx-88813542	T	C	SNP	1	7388016	1	5909356	GAGGATGAAGATGCTGAAGCAATTGATTTCAAAGT[C/T]TATAAGCTGGATCAGGAATGGGGTAAATGGGTGGA
N	AX-123614283	Affx-88813554	AX-89803347	Affx-88813554	A	AATAT	Indel	1	7400583	1	5921931	ATTTGCCAACACTTTGTACAATGAGCAAACACTGA[-/ATAT]ATGCATTGTATGGATCCAAAAAACCAAAACAGTCT
Y	AX-123366841	Affx-88813557	AX-89904297	Affx-88813557	T	C	SNP-SNP	1	7401371	1	5922718	CACTTTCATCTTTCTTTAATCTCAGACGTAAACCT[C/T]TCCAGGTTGTCATGTTAAACATGTGTGCCATACTT
N	AX-166503048	Affx-88813561	AX-89780551	Affx-88813561	A	G	SNP	1	7417041	1	5941373	ATCGCCGCCTCAATTACTCTACAACTTTAAGATGT[A/G]GCTAAGGATGTGGTCTGGATTAGGCGTCAAGCGGA
N	AX-166503049	Affx-88813563	AX-89780552	Affx-88813563	A	G	SNP	1	7422780	1	5947113	AGCATTACATATGGGTACCCGACAAATGACAACAC[A/G]TGAGCTGGTTTTGAGAAAGATAGTATCTCATACCA
N	AX-166503050	Affx-88813566	AX-89780553	Affx-88813566	T	C	SNP	1	7423579	1	5947910	GAGGCATCATGACCCATGGCAGAAACTCCTTGACA[C/T]AAACACAAAACTTCACTCCATTTTGAACCGGCGTC
Y	AX-166503051	Affx-88813568	AX-89780555	Affx-88813568	T	C	SNP	1	7427777	1	5952109	TTCAAGTTTGGCATCAATACATTCCTTTGCCATTA[C/T]AGTTCCCTTTCTATATCCACCAGGGAAGCACTCAA
N	AX-166518639	Affx-88813570	AX-89860650	Affx-88813570	A	ACAC	Indel	1	7428690	1	5953023	AGGCTAAGAGCATAAAATCTTCATGTTGTTCATGA[-/CAC]ACTATGGAGTTAGCTTTATCTTTCCACTACATGAA
N	AX-166510981	Affx-88813573	AX-89818771	Affx-88813573	A	G	SNP	1	7429732	1	5954064	CGCATAGTTTGTAGGTCAAGTCACTGGAAGACGAC[A/G]TCGTTTCCGGTTCGGATTCGGCGTTTTGATTGGGC
N	AX-166503052	Affx-88813574	AX-89780557	Affx-88813574	T	C	SNP	1	7431761	1	5956095	CAAATGTATTGTTCTATGCAGGGATGTCAAAGAAT[C/T]CAGAGTTTGTGAAGGAGGTTTCATCACATTTCAGA
N	AX-166527430	Affx-88813577	AX-89904299	Affx-88813577	T	C	SNP-SNP	1	7437075	1	5961414	GTCTTCACCCTCATTTCCCACCTGTTTCAAGATTA[C/T]GGAATTTAAATATGTTGAAGGGCAGAAAAATTACA
N	AX-166520399	Affx-88813582	AX-89818773	Affx-88813582	A	G	SNP	1	7448336	1	5972978	TCGTCTGGTTCAATACCTTGGTACACCATGATGGT[A/G]TTGCATAAAAAATCACCGTTCTTCCAAAGTGTAGA
N	AX-89875903	Affx-88813590	AX-89818774	Affx-88813590	T	C	SNP	1	7453561	1	5978202	TCTAAGAAGATAGTTTGTAATGGCCTGGTTTTTAC[C/T]GATAATTGCTTTGTGAAGAACAGTCCAATCATTCT
N	AX-166503053	Affx-88813591	AX-89780564	Affx-88813591	A	C	SNP	1	7453587	1	5978228	GGTTTTTACCGATAATTGCTTTGTGAAGAACAGTC[A/C]AATCATTCTGAAAAATAATAAATCCGGCTCAATCA
N	AX-166510982	Affx-88813593	AX-89818775	Affx-88813593	A	C	SNP	1	7459103	1	5983744	TCAGGAAGTGTAGCAGAATGAGCTCCAATAACTTT[A/C]CCGCCAACATCAGGGAAAATTTCATAACCTGGCAG
Y	AX-166520400	Affx-88813593	AX-89818775	Affx-88813593	A	C	SNP	1	7459103	1	5983744	TCAGGAAGTGTAGCAGAATGAGCTCCAATAACTTT[A/C]CCGCCAACATCAGGGAAAATTTCATAACCTGGCAG
N	AX-123357136	Affx-88813595	AX-89780566	Affx-88813595	A	G	SNP	1	7461653	1	5986294	ACCAAGAAAATACTGATTTTCAATGTATATGAAAT[A/G]TTGGGCAGATCTGATTGCCTTGATGTATGCTGTCT
N	AX-166510983	Affx-88813598	AX-89818778	Affx-88813598	T	G	SNP	1	7462204	1	5986845	CGAAACCTTTTTACGTAGTCCAAACTCCCTCCATT[G/T]TGTTGCTTTCCTCCACCGTTGCTCAAAGTTTATGA
N	AX-166503054	Affx-88813600	AX-89780569	Affx-88813600	A	G	SNP	1	7462725	1	5987366	CACATTTTTGATGGTGTGTAAAGAGGGTTCCAACA[A/G]CCTGTAAAAATCCATAAAATAATGAGTTAAATTTG
Y	AX-166510984	Affx-88813602	AX-89818780	Affx-88813602	T	G	SNP	1	7463514	1	5988155	AACCTTCCTTCCATCCAATTCAATCTGCGGCAGCA[G/T]CCCCTCCGGCACGTGCGCGTCCTGGTAGAGCCGCA
Y	AX-166510985	Affx-88813605	AX-89818781	Affx-88813605	A	C	SNP	1	7473256	NA	NA	AAAGGCCGAAGCACGTTGCATATTTTACAGGACTA[A/C]TGACTATGTCCAAAGCGCAAGAAGCTGCTGCTAAT
N	AX-166520401	Affx-88813605	AX-89818781	Affx-88813605	A	C	SNP	1	7473256	NA	NA	AAAGGCCGAAGCACGTTGCATATTTTACAGGACTA[A/C]TGACTATGTCCAAAGCGCAAGAAGCTGCTGCTAAT
Y	AX-166503055	Affx-88813606	AX-89780571	Affx-88813606	T	C	SNP	1	7474543	NA	NA	TGGAGGAACTTCTATGGAAAGAAGGCAAGAGATGC[C/T]ACACTTTGCCGCACACGATGAGGTTTTTGAGTTTG
Y	AX-166520402	Affx-88813607	AX-89875911	Affx-88813607	T	C	SNP	1	7474594	1	5999192	CGATGAGGTTTTTGAGTTTGGAAAGACAAGAGAGT[C/T]TGTTGGCACTGCTGCTAATGAAAGCACAAGCATGC
N	AX-123614968	Affx-88813609	AX-89806538	Affx-88813609	C	CTCGA	Indel	1	7482405	1	6007014	AAACTTGTCCATGAGCAGCAAACAACATTCATTTC[-/TCGA]TCTCAACATTTATCGAATGTTATTGTTTTCTTGAT
N	AX-166509641	Affx-88813609	AX-89806538	Affx-88813609	C	CTCGA	Indel	1	7482405	1	6007014	AAACTTGTCCATGAGCAGCAAACAACATTCATTTC[-/TCGA]TCTCAACATTTATCGAATGTTATTGTTTTCTTGAT
Y	AX-166520403	Affx-88813610	AX-89875912	Affx-88813610	A	G	SNP	1	7488981	1	6013585	AAACTCTCTGCCTCTTTAAAGCATGTGTCCAACAT[A/G]CCAAGATGCTCAGCCCAGAGTGACATTCGATACCC
Y	AX-123365101	Affx-88813611	AX-89818782	Affx-88813611	A	G	SNP	1	7490247	1	6014851	GCTCTGATTTTGCTGGCAATCTTCAGTGCCAACTC[A/G]ATTGGAATCAGATTGTCAGCTCCTGATTGGACCAT
N	AX-166520404	Affx-88813615	AX-89818784	Affx-88813615	T	G	SNP	1	7491310	1	6015915	CTCAGGACTAAGTATCCATGAAATACGGCCTATCT[G/T]AAGTAAAGAATCATGCCAATGAGACACCCTTTTAC
N	AX-89875917	Affx-88813619	AX-89875917	Affx-88813619	A	G	SNP	1	7496550	1	6021156	TTGAGGAGATGGGGCTGCTGCTAATGAAAGCACGA[A/G]CATGCTTAGCAATGCCACACATCTTAACACAGTAT
N	AX-166503056	Affx-88813623	AX-89780576	Affx-88813623	A	G	SNP	1	7502909	1	6027515	TTTGGGGAGGTAGGTTCTTTCGAAGCAAAACTACT[A/G]GATCCATTCCTAGGCTTTCTCCTAGCCTCTCTCGG
N	AX-166510986	Affx-88813625	AX-89818787	Affx-88813625	T	C	SNP	1	7505497	1	6030103	CTAGGCAGCTGGAGTTCAATAGCATTCTTTAGCAT[C/T]TCATCGTTGAGATACAGGGCACAGTCTCCAGTCCC
Y	AX-123365102	Affx-88813627	AX-89818789	Affx-88813627	T	G	SNP	1	7505893	1	6030499	GTCGTTCTCTTGGCATCAACATCATCATGGCACAG[G/T]ACAGCTAAAAGATTAACACCTTCTGTATCCAACAT
N	AX-166510987	Affx-88813627	AX-89818789	Affx-88813627	T	G	SNP	1	7505893	1	6030499	GTCGTTCTCTTGGCATCAACATCATCATGGCACAG[G/T]ACAGCTAAAAGATTAACACCTTCTGTATCCAACAT
N	AX-166510988	Affx-88813629	AX-89818791	Affx-88813629	T	G	SNP	1	7507360	NA	NA	AGTCTCCTCTGGATATACCCAGTCTCAGATGTCTT[G/T]ACTGCAGTATCTATAAGACCTTCCCTACCTCCCAT
Y	AX-166503057	Affx-88813632	AX-89780577	Affx-88813632	T	C	SNP	1	7508246	1	6032852	GTCCCAAGTGCCTTTTTGCACAGAGTTCCAGAAAG[C/T]AACTCCCCTTTTTCTATTCTAACATGAGTATCACC
N	AX-166510989	Affx-88813633	AX-89818792	Affx-88813633	A	G	SNP	1	7508708	1	6033314	AACACCTCTGCCCTAGTTTCAAATGACTGGGGAAC[A/G]TGCATATTCATTTCATCCCCATCAAAATCAGCATT
N	AX-89818794	Affx-88813637	AX-89818794	Affx-88813637	A	G	SNP	1	7513068	1	6037674	AGTAAGTTGGAGATGTTGGGGAATATGCTGGTGAA[A/G]TTAGACTGCAATTGAACATGAAAAGAAACAACCAT
N	AX-166520405	Affx-88813643	AX-89818798	Affx-88813643	T	C	SNP	1	7516439	1	6041045	GCTTTACTGATAAGTTCTTTCACTTCATTTTTTGC[C/T]TTGTAAATAGCTTCATTGATCTTTTCCATTGTTGC
Y	AX-89780581	Affx-88813646	AX-89780581	Affx-88813646	A	G	SNP	1	7516966	1	6041572	AGACTTCCTGTAGAAGTCCCAAGTGCCCTTTTGCA[A/G]AGTGTTCCAGAAAGTAACTCCCCTTTTTCTATTCT
N	AX-166520406	Affx-88813647	AX-89818800	Affx-88813647	T	C	SNP	1	7517053	1	6041659	GGGGTAATGTCACCACTTTCTGATTCAGAGTGCCA[C/T]GATGAAATTCTCTGGAGATTTATCTGCTTTGGTAT
N	AX-166510990	Affx-88813649	AX-89818802	Affx-88813649	T	C	SNP	1	7517460	1	6042067	TGAGCTCCAAAGCTTCTGCCCTAGTTTCAAGTGAC[C/T]GAGGAACATGGACATTCATTTCATCCCCATCAAAA
Y	AX-166520407	Affx-88813649	AX-89818802	Affx-88813649	T	C	SNP	1	7517460	1	6042067	TGAGCTCCAAAGCTTCTGCCCTAGTTTCAAGTGAC[C/T]GAGGAACATGGACATTCATTTCATCCCCATCAAAA
N	AX-166520408	Affx-88813651	AX-89875935	Affx-88813651	T	C	SNP	1	7518127	1	6042734	AACTCTCTTCCCCATCAAGTTTCCTCTAATCCGGC[C/T]GTGCTTTGCCTGAAGTCTACAACATATTGATTTAA
Y	AX-166517613	Affx-88813654	AX-89847139	Affx-88813654	A	G	SNP-SNP	1	7523292	1	6047899	ATACATTCACAAGTATGAACTGGTTTTGTTAAGAG[A/G]GTAGGTTAGAAGTAGCCATCTTATTGAGCTAGTTA
N	AX-166519463	Affx-88813655	AX-89867541	Affx-88813655	C	G	SNP-in-Insertion	1	7528951	1	6053560	ATCTGTAAGTTTCATATCATAGTTGTGTAAATACT[C/G]TTTCTTCTGATTCATTACATAGAGCCACTTATGTT
N	AX-166510991	Affx-88813660	AX-89818805	Affx-88813660	T	C	SNP	1	7531498	1	6056105	TTATTGACCAGGCGAATATTTGCAAAAGTGCCTCT[C/T]GCCATTATTTCATCATTACCACGACGACTACCATA
N	AX-166510992	Affx-88813662	AX-89818806	Affx-88813662	A	G	SNP	1	7532676	1	6057283	TCTTGTGAGTACCTCTTTTCCAAGTATTTGGTTAC[A/G]ACCCCAGATCCAGGAGCAAGACTAGTCTTAATCCA
Y	AX-123360226	Affx-88813663	AX-89818807	Affx-88813663	A	G	SNP	1	7533119	1	6057726	CTCCAATCCTAAATCACAAGCTTTCTTTGCAACCA[A/G]TGCAGCTCCAAGCATTACACTAGGATTTGAGGTGT
N	AX-123524275	Affx-88813663	AX-89818807	Affx-88813663	A	G	SNP	1	7533119	1	6057726	CTCCAATCCTAAATCACAAGCTTTCTTTGCAACCA[A/G]TGCAGCTCCAAGCATTACACTAGGATTTGAGGTGT
Y	AX-123360227	Affx-88813665	AX-89818809	Affx-88813665	A	G	SNP	1	7535473	1	6060080	AATACCTGAAGAAGGACTCTAGCAGGTTTGAATGG[A/G]ATCTCAACCTGCTTGGGAGCACTGTTCTCCCAATC
Y	AX-123360228	Affx-88813670	AX-89818810	Affx-88813670	T	C	SNP	1	7544754	1	6069542	TCAGAAGTCTACCACAATGCCATCACATGTTTCAC[C/T]TGCCATGTATAGATAAGTGGCTCCTGAGGCATGGT
N	AX-166517614	Affx-88813671	AX-89847140	Affx-88813671	C	G	SNP-SNP	1	7545560	1	6070348	ATCCTTGCATTCCAATTTAAACACAGAAACCATTT[C/G]GAGCTTAATTAAACTTCAAGTAACATAATGAAGAA
N	AX-123365103	Affx-88813672	AX-89875945	Affx-88813672	A	C	SNP	1	7550164	1	6074955	ACAGTGACTGCATGTTAGGCTCTGGTGCTTTTGCA[A/C]ATGTTTACAAGGGAACCTTTGAGGATTTGGGAACC
N	AX-166519003	Affx-88813674	AX-89806539	Affx-88813674	C	CAATT	Indel	1	7550693	1	6075485	GTGTTAATTAGGTTTGTGTTTAATCAATTATGTTC[-/AATT]AATTTACATGTAGGAAGGAAATGGATCAGCTTAAG
Y	AX-166503058	Affx-88813675	AX-89780587	Affx-88813675	A	G	SNP	1	7552567	1	6077358	GGAGACATGCCCTTCAAGTAGAATTCAGTTTCAGG[A/G]GCAACAAACTTTAACAGCCAACCATGAAGAGCTTC
N	AX-166510993	Affx-88813680	AX-89818813	Affx-88813680	T	C	SNP	1	7554887	1	6079678	GAGTAGAGTGACTGGTTGTACTTACATTGTGCTTC[C/T]GCAAAACCATACCTTCTCTCCACAGCCAGCTTCAG
N	AX-166520409	Affx-88813680	AX-89818813	Affx-88813680	T	C	SNP	1	7554887	1	6079678	GAGTAGAGTGACTGGTTGTACTTACATTGTGCTTC[C/T]GCAAAACCATACCTTCTCTCCACAGCCAGCTTCAG
Y	AX-123360229	Affx-88813685	AX-89818815	Affx-88813685	A	G	SNP	1	7558428	1	6083219	TCAGGCTTTTTTAAATACACATCTCCAATGGATCT[A/G]GAAATCTGCAAAAGAACAATACCTCCATAAAATCA
Y	AX-166509146	Affx-88813686	AX-89803350	Affx-88813686	A	ACAC	Indel	1	7559023	1	6083815	TGAAAACAAAGCTTCAATTCATTTCAGAGAATGTA[-/CAC]CACTACACCTAAGGGGGATTTCTCATTAATGTGTA
N	AX-166503059	Affx-88813690	AX-89780591	Affx-88813690	A	C	SNP	1	7560515	1	6085307	GCATGATGCCAATACTATCCTCAACTTTAGAAAGC[A/C]ACATAAACAGCATATAGTTGCTTGAAACAGTGATA
N	AX-89780593	Affx-88813694	AX-89780593	Affx-88813694	T	G	SNP	1	7564995	1	6089787	CCAGTGTGCATACAACACCGTACTCCCTTAAACAC[G/T]ACTCCACTATCGGCCATTCTTTCTGCAGCACATCT
N	AX-166509147	Affx-88813695	AX-89803351	Affx-88813695	C	CCTT	Indel	1	7569579	1	6094422	ATCCAGTACCTCCTCAACATCTCCGCCATCGGCTC[-/CTT]CTTCTGCCTCTTCCTCTTCCTCTTCGTCAAGCTCC
Y	AX-166510994	Affx-88813698	AX-89818817	Affx-88813698	A	G	SNP	1	7570381	1	6095223	ATGGCTAGCTTAGGTTACACGGATGATAGGAAGTT[A/G]GGAGAGTTGCAGGAATTGAGAGCTGAATTGGAGAC
N	AX-166520410	Affx-88813700	AX-89818818	Affx-88813700	T	C	SNP	1	7571059	1	6095901	TTAGAGAGTGCCCTGCTAAAAATGGGAAGGTGCTA[C/T]TTGGATGGAGAAGATTGCAAGAGGATTGAGCAGTA
N	AX-166510995	Affx-88813701	AX-89818819	Affx-88813701	T	C	SNP	1	7571093	1	6095935	ATTTGGATGGAGAAGATTGCAAGAGGATTGAGCAG[C/T]ACATGAGTGCATCATTTTTGTCAAGATCCTGCCTT
Y	AX-123365104	Affx-88813704	AX-89875955	Affx-88813704	T	C	SNP	1	7575325	1	6100169	GTCTTCTGTTGGAGGCTGTTGCGTGATGCCATTCC[C/T]ACACGTATGGCCCTAGTGAAGCGATATGTGCAGGT
Y	AX-166520411	Affx-88813706	AX-89875957	Affx-88813706	A	G	SNP	1	7575914	1	6100758	GGAGGTTGAGGCGTGTAGGGCGGGTCTTCAACTTG[A/G]AATTCATCAAGGTTGGACTGATATTGATATTGAGA
Y	AX-166519004	Affx-88813707	AX-89862753	Affx-88813707	T	TTCGA	Indel	1	7575959	1	6100804	GGTTGGACTGATATTGATATTGAGAGCGATTCTAT[-/TCGA]TCTACTTGTTACTGCATTAGAGAGGAAGGAGGGGG
Y	AX-166503060	Affx-88813713	AX-89780597	Affx-88813713	T	C	SNP	1	7581979	1	6106820	TTTCGAGGTCAGCAAATATGACCCTAAAGGATCAT[C/T]GACTAGCAAGATAGTCCGTTGCAACAACAGGTTGT
N	AX-123360230	Affx-88813717	AX-89818823	Affx-88813717	T	C	SNP	1	7583151	1	6107992	GGAAGCCAGTTTGAAGTATATAATCCAATCATTGT[C/T]ATCTCAGCTGGGGTAATGTTATGTTATTACTGTTT
N	AX-166503061	Affx-88813730	AX-89780604	Affx-88813730	A	G	SNP	1	7603746	1	6128601	GCTGAGTTCGAACTATTATGACAAAAGCTGTCCTA[A/G]TGTTGAGCTTCTCGTCTCCAATGCTGTCAAGAAGG
Y	AX-166503062	Affx-88813732	AX-89780605	Affx-88813732	T	C	SNP	1	7604579	1	6129434	TCATCTTTCCAAAACAGAATCCACAACTTCAATGC[C/T]ACACACGATGTTGATCCTACGCTGCACTCCTCCTT
N	AX-89818825	Affx-88813733	AX-89818825	Affx-88813733	T	C	SNP	1	7605649	1	6130504	ACCAGGAGAATTCTGGAGCAGATATGCCACAGTTG[C/T]AAAGAGGTCATCAAAGGCTTAACAACACAAACAGA
N	AX-123364724	Affx-88813737	AX-89867545	Affx-88813737	A	T	SNP-in-Insertion	1	7608623	1	6133486	GAAGATCTATAAATCATGGCATCTTAATAAAAAGA[A/T]TCTCTGATATGTACTATTGAGTAGTTAGTTAATTC
N	AX-89818826	Affx-88813738	AX-89818826	Affx-88813738	A	C	SNP	1	7608934	1	6133796	GATGTAGTTGTCATAAGCATGGAAGCTATTCATTC[A/C]AAGCATGTGGATGCAAATCTGCTTGCTGAGTTCAT
Y	AX-166503063	Affx-88813745	AX-89780607	Affx-88813745	A	C	SNP	1	7629340	1	6154218	GTACAATGTTTTCCACTTGGAAGGATCTAAAAGAA[A/C]CTCCCTTGCACTACCAGATTCCTCTAGTAACCCAT
Y	AX-166503064	Affx-88813746	AX-89780608	Affx-88813746	T	G	SNP	1	7630194	1	6155072	CAGAATTTTTACCTCAAGGGTTGCCTAGAAAGTGG[G/T]CAGACGAGTCTCTCGTATAGCGTCTTGTTGAGCCC
Y	AX-123357138	Affx-88813749	AX-89780609	Affx-88813749	T	C	SNP	1	7648171	1	6173056	CAAGGCAGTATCACTTTAATTATACAACTCCAGAT[C/T]GCTCTCGACAGGAGATGTTGAGAACGATGACGCCC
N	AX-166510996	Affx-88813753	AX-89818828	Affx-88813753	A	G	SNP	1	7649535	1	6174420	TTTCTTTATGCCTCCATTGAGTGTTCTCTCTACTG[A/G]TACACACCCAATTGGCGGTATATTTACTCCACACA
Y	AX-166520412	Affx-88813753	AX-89818828	Affx-88813753	A	G	SNP	1	7649535	1	6174420	TTTCTTTATGCCTCCATTGAGTGTTCTCTCTACTG[A/G]TACACACCCAATTGGCGGTATATTTACTCCACACA
Y	AX-166503065	Affx-88813754	AX-89780610	Affx-88813754	T	C	SNP	1	7649841	1	6174726	TTGTGAAAGAATGAATAAGCTTTGTGACAGTAGAG[C/T]GGCTGTTCTTTCATTCCCAACTGCTGCGTTTATCT
Y	AX-123614284	Affx-88813756	AX-89803355	Affx-88813756	C	CAAAT	Indel	1	7651841	1	6176727	CTAATTGATCTGATAATGACAAGACAGACTGATAC[-/AAAT]AGAAATCAGAGAAAGCAAGGATGTATGATATGTTG
Y	AX-166510997	Affx-88813761	AX-89818830	Affx-88813761	T	C	SNP	1	7658049	1	6182938	TGAGGATCCTGTATGCCTTCTCTGTGGGATGAATG[C/T]TATCCCAGTATAAGTACTCGGACACATTGTTACAA
N	AX-123357139	Affx-88813763	AX-89780613	Affx-88813763	T	C	SNP	1	7662527	1	6187416	ATGAAAGCTATCCCAGAATATGTACTTGGACACAT[C/T]GTCACAAGTACCAGGGGAGGCTTTGTTACACAAAG
N	AX-89875968	Affx-88813764	AX-89818831	Affx-88813764	T	G	SNP	1	7662779	1	6187670	GGATTATGGAAAGCAAAGGGGTATATATATCAGCG[G/T]AAAAGAGTTGTGCTTCTGGAAGTCTCTTATTGAGG
Y	AX-166510998	Affx-88813765	AX-89818832	Affx-88813765	T	G	SNP	1	7662806	1	6187697	TATCAGCGTAAAAGAGTTGTGCTTCTGGAAGTCTC[G/T]TATTGAGGAAGTCTATTTGGGTGGAGAGCTTGGAG
N	AX-89875969	Affx-88813765	AX-89818832	Affx-88813765	T	G	SNP	1	7662806	1	6187697	TATCAGCGTAAAAGAGTTGTGCTTCTGGAAGTCTC[G/T]TATTGAGGAAGTCTATTTGGGTGGAGAGCTTGGAG
Y	AX-123365106	Affx-88813770	AX-89875971	Affx-88813770	T	C	SNP	1	7665248	1	6190139	GCTTCACTGGCAATCACTTTCGTACCTATGCATGC[C/T]TGAATTGGCACCTTAAACATCTGTCTTGGTATAAG
N	AX-166510999	Affx-88813772	AX-89818834	Affx-88813772	T	G	SNP	1	7666823	1	6191714	TTGCCGTGGTCGATGTGGGCGATGATGCAGAAGTT[G/T]CGGATGTGGGAGATGGGGACTTTGGAGAGGCGGTC
Y	AX-166503066	Affx-88813778	AX-89780617	Affx-88813778	A	G	SNP	1	7684391	1	6211194	AAGAAAAAGAAAGAAGGGCAGCTTAAGGGAGTACA[A/G]TGATGATGATTTTTTGGAATATAAGCTGTGAGTAA
Y	AX-166511000	Affx-88813781	AX-89818836	Affx-88813781	T	G	SNP	1	7686626	1	6213429	AAGTTGAAAGTGAAATTGTTTGATGATTCACATCT[G/T]GGAGCACTCCAAAGAGTTGATTGGCTAGTGCACAA
N	AX-166520413	Affx-88813781	AX-89818836	Affx-88813781	T	G	SNP	1	7686626	1	6213429	AAGTTGAAAGTGAAATTGTTTGATGATTCACATCT[G/T]GGAGCACTCCAAAGAGTTGATTGGCTAGTGCACAA
N	AX-166503067	Affx-88813786	AX-89780620	Affx-88813786	T	G	SNP	1	7691467	1	6218271	CTTGCCTTGTGTCTCTTCAAAGGACCAAGGATCCA[G/T]AAGTATTACCTAGGGAGAAACAACAGCCTAGCCAG
N	AX-166503068	Affx-88813789	AX-89780622	Affx-88813789	T	C	SNP	1	7694374	1	6221179	ATATCAAATCTAAGGAAGCACCTGCTAAGGATGTC[C/T]TGAAAGATCTTGTGGAAATGTCACGTGGTATTCAG
Y	AX-166503069	Affx-88813791	AX-89780623	Affx-88813791	T	C	SNP	1	7695298	1	6222104	TATTTGATGGATTGCATAATTCAAGTCTTTCCTGA[C/T]GAGTACCACTTGCAAACTCTTGATATTTTGTTGGG
N	AX-166503070	Affx-88813792	AX-89780624	Affx-88813792	T	G	SNP	1	7696763	1	6223569	TCATTTGTTAAGAAGCTCTCAGGAAAAGGAAAAAT[G/T]GAAGACAGCAGGGCAACAAAACAAGTTGTTGCACT
N	AX-166520414	Affx-88813796	AX-89875977	Affx-88813796	T	G	SNP	1	7699197	1	6226004	TTTATTTCTTTGAGAAGGGCAACCCACAGATAACT[G/T]TTGCTTCTGTACAAAGCCTGATTGAATTGATTACT
Y	AX-123363531	Affx-88813800	AX-89847141	Affx-88813800	A	G	SNP-SNP	1	7702084	1	6228892	AAACAAACTAGGCAGGAAGAATATGAAAACCAAAC[A/G]ATGAAATAGATGGAGCAAACTGGAAACACAAGGGC
N	AX-166520415	Affx-88813805	AX-89818845	Affx-88813805	A	G	SNP	1	7708339	1	6235150	CGAGTCAATAGGATTTGAAGGCTTCCTCTTCTCAA[A/G]AAAAGAGTCAAACGCTTTGCTATCATCAGGTTTCT
N	AX-166511001	Affx-88813806	AX-89818846	Affx-88813806	T	C	SNP	1	7708981	1	6235792	CCTCATTCGCTTTTCCATATTTTTCCTCAACTTCT[C/T]GGCTTCCTCCTCTTCCTTTCTCCTCAATATCCTCG
N	AX-166503071	Affx-88813809	AX-89780628	Affx-88813809	A	G	SNP	1	7725641	1	6254196	TGAATGGAAGTGGAAATGTGAATCAGGTTTTAGAA[A/G]GAGGAATTCAAAGGAGTTATGGGTTGAGAAATACA
N	AX-166503072	Affx-88813811	AX-89780630	Affx-88813811	T	G	SNP	1	7725811	1	6254366	TTTACTTTTTTCTTTTACAGGTTGAAGAAGTTAAG[G/T]GCTGGTTCGAAGAAAGATTAACAAATTCAAAGGTT
N	AX-166511002	Affx-88813812	AX-89818848	Affx-88813812	T	G	SNP	1	7727446	1	6256001	GCAAGTGGAGGTGACATAAGAAATGCAATTACATC[G/T]TTACAGTTCTTCTATTTGAAACCAACTCCCATGCA
N	AX-166520416	Affx-88813812	AX-89818848	Affx-88813812	T	G	SNP	1	7727446	1	6256001	GCAAGTGGAGGTGACATAAGAAATGCAATTACATC[G/T]TTACAGTTCTTCTATTTGAAACCAACTCCCATGCA
N	AX-89875983	Affx-88813814	AX-89818849	Affx-88813814	A	G	SNP	1	7728142	1	6256699	ATTGTCTTTCAGTTCTGGATTTCCTGAGTGAGGAG[A/G]CAATGGATGATTCCTGGTCAGTTGCTTCATATTTA
Y	AX-123359751	Affx-88813817	AX-89811611	Affx-88813817	A	G	SNP-in-Insertion	1	7729915	1	6258474	ACTGTAGTAATACACAGAGGCATTGAAGAAACACC[A/G]GAGTCTGTACCAGCTAAGTTTTCTCTTTATGCGAG
N	AX-123524115	Affx-88813817	AX-89811611	Affx-88813817	A	G	SNP-in-Insertion	1	7729915	1	6258474	ACTGTAGTAATACACAGAGGCATTGAAGAAACACC[A/G]GAGTCTGTACCAGCTAAGTTTTCTCTTTATGCGAG
N	AX-89780635	Affx-88813820	AX-89780635	Affx-88813820	A	G	SNP	1	7734437	1	6262998	ATTCTTTCCAATTCCACACCTTTCTCCTCAATTTA[A/G]TAGCCTCTTGATATCCAGCTCCTGATCAGCACTTT
Y	AX-89875985	Affx-88813821	AX-89875985	Affx-88813821	A	C	SNP	1	7734852	1	6263413	TGAACTACAATGGCATGCACTACAGTTAGGAAGCT[A/C]TTGATTCCTTCAGATGCTACTTTGTCTGGGATCCG
Y	AX-123366842	Affx-88813823	AX-89904301	Affx-88813823	T	C	SNP-SNP	1	7734934	1	6263495	GGTGCCATTCTTCACAGAATGTGTAAATTCTTGAT[C/T]CTTGACTTGTTTTTGGTAACGGATTTCTCCTAAAC
N	AX-166520417	Affx-88813825	AX-89818851	Affx-88813825	T	C	SNP	1	7735179	1	6263740	AGCTGCTGAACTATATGCTTCTGGACTTGGTGGCA[C/T]TCATACATGCTTCTCCACATACACATCAATCTACA
N	AX-123360232	Affx-88813826	AX-89818852	Affx-88813826	T	C	SNP	1	7735878	1	6264439	AAATAAAGACTAACCCTTTGACAAGCTCAAGTAGT[C/T]GAGGGTACAATTCTGTGTCCCTTATCTTGATGATC
N	AX-123524277	Affx-88813826	AX-89818852	Affx-88813826	T	C	SNP	1	7735878	1	6264439	AAATAAAGACTAACCCTTTGACAAGCTCAAGTAGT[C/T]GAGGGTACAATTCTGTGTCCCTTATCTTGATGATC
N	AX-166511003	Affx-88813827	AX-89818853	Affx-88813827	T	C	SNP	1	7736067	1	6264628	TCTTCAATGTTGAAACCCTCTTCTCATGCTCTATC[C/T]TTATCGTCTCTGCCTCCTGAAAACCATCCAAGAAA
N	AX-89875988	Affx-88813827	AX-89818853	Affx-88813827	T	C	SNP	1	7736067	1	6264628	TCTTCAATGTTGAAACCCTCTTCTCATGCTCTATC[C/T]TTATCGTCTCTGCCTCCTGAAAACCATCCAAGAAA
N	AX-166511004	Affx-88813829	AX-89818855	Affx-88813829	A	C	SNP	1	7743323	1	6271884	GAAAATGTTTTCAGGGAGCTACTGAAAGGAGAATC[A/C]GAGGGGCTGTTGAAACTACCCACAGACAAGGCTTT
Y	AX-166503073	Affx-88813831	AX-89780638	Affx-88813831	T	C	SNP	1	7745044	1	6273605	TTCACTTTGTTCACAGGTGCATCACATTTAAGGGA[C/T]ACTTTTTACCGCATGGGACTAGATGATCAGGACAT
N	AX-166503074	Affx-88813835	AX-89780641	Affx-88813835	T	C	SNP	1	7747322	1	6275882	CCTTGCTTCATTAAGCAGATTCCGAGATTGCACAT[C/T]TTGTTGTTGTCTGGTGCAATTGTTAGTGCTCGTCT
N	AX-166503075	Affx-88813836	AX-89780642	Affx-88813836	A	G	SNP	1	7747377	1	6275937	TTGTTAGTGCTCGTCTGTATGCATCTTCGGCTTCA[A/G]TGTAGTTGTTCTGCTGCATCAAAGCCCACCCCAAG
Y	AX-166503076	Affx-88813837	AX-89780643	Affx-88813837	T	C	SNP	1	7753617	1	6283815	TCATCAGATGCAACCTCATGTCACAAGGCCGAACA[C/T]TATTTCCAATGCATGCCATTACAAACTTTGAATAG
Y	AX-166503077	Affx-88813839	AX-89780644	Affx-88813839	T	G	SNP	1	7756426	1	6286624	TGGCTTTGACATTCAATTCTCGCCTTGTTTATCAG[G/T]ACACGAGCATCTGCTTTGAGCCCAGCACAGGCTAG
Y	AX-123366843	Affx-88813841	AX-89904302	Affx-88813841	C	G	SNP-SNP	1	7759104	1	6289302	AGTATGCGTAGGCCTTGAAGAGACTTCGGTTGATT[C/G]ACACGTTTCCTAGTGTATGCATTGCCATTCTCCCT
Y	AX-123366844	Affx-88813843	AX-89904303	Affx-88813843	T	C	SNP-SNP	1	7759620	1	6289818	GCATTGGAGGTATCATGATTCAGCATCCATGCAAA[C/T]GTAGCTTTCCCAGAGTATTTGTCAAGGAAATTAAG
Y	AX-166503078	Affx-88813844	AX-89780645	Affx-88813844	T	C	SNP	1	7759893	1	6290091	TCGGATGCTGCCAATGTGAACACTCCATTTTTGCG[C/T]AACCACCGGGACATAATCAATCTGCCCATGCTGCC
N	AX-166503079	Affx-88813848	AX-89780646	Affx-88813848	A	C	SNP	1	7762349	1	6292547	CTTCGGTCCTTTTGTAGTATTTGTCAAAAGAGGAG[A/C]ATTTGTGGAAGTAGAAAGTAGGTAACCTTCTTGAG
N	AX-166520418	Affx-88813850	AX-89818861	Affx-88813850	T	C	SNP	1	7763054	1	6293252	GAATCAACCTCAACTTGTTCTGCTTGAGTAGCAGG[C/T]TTGCTATACTTTCTGATCACATACTCCGAAAGCTT
N	AX-89818862	Affx-88813851	AX-89818862	Affx-88813851	T	C	SNP	1	7763094	1	6293292	TATACTTTCTGATCACATACTCCGAAAGCTTCACC[C/T]GCGCTGTTGTAATCTCTGCCGTCGAATTCAAGATG
N	AX-166511005	Affx-88813852	AX-89818863	Affx-88813852	T	C	SNP	1	7763138	1	6293336	GTAATCTCTGCCGTCGAATTCAAGATGTTCCACAT[C/T]CGCAAAATGGGGCGTTGCAGAAGCTCGTAACGAAG
Y	AX-166503080	Affx-88813854	AX-89780649	Affx-88813854	T	C	SNP	1	7769640	1	6299838	CTCCGGCGCGAACAGCGAGAAAAAGTAATGCGAAT[C/T]GTCGAGCTTGACCACCGCCTCGTCCTTCAACAGCG
N	AX-166503081	Affx-88813855	AX-89780650	Affx-88813855	T	C	SNP	1	7771906	1	6302104	GATGGTGGTTAACACAAAGTGAGGAAATGCAAGAA[C/T]GAGTGCGAAAGCTAGTAGAAGCTGGGCAGCTAGAG
Y	AX-123357140	Affx-88813856	AX-89780651	Affx-88813856	A	G	SNP	1	7772482	1	6302680	AAGTCTCTTGAAGTTATCTGGCAAGGATCCAGAAC[A/G]CTTGGTTCTTCATCTCAGGTTAAAACTACAACCCT
N	AX-166519005	Affx-88813858	AX-89862755	Affx-88813858	A	ACGT	Indel	1	7772794	1	6302993	ATGATAACACTGCAGGATAATCCTCTTCTCTTTGA[-/CGT]CTCCAATATTGAGGAGCGTGTTAATGATTTTGTTA
Y	AX-123365107	Affx-88813859	AX-89818865	Affx-88813859	A	G	SNP	1	7774666	1	6304864	AAATGGATTTTTCTCTGTGATGGATAGTCCACAGA[A/G]TGAGACCATTGAAGTTGGACCTGGAGACCTGAAGA
N	AX-166503082	Affx-88813862	AX-89780652	Affx-88813862	T	C	SNP	1	7777315	1	6307513	CAAACCAAGACAAGTCAGAGATGAAGAGGATGGAA[C/T]GGAAAGTTGAAGGCAATAATAACACAGAGCCTATC
N	AX-89876000	Affx-88813863	AX-89818868	Affx-88813863	A	C	SNP	1	7777372	1	6307570	ACACAGAGCCTATCCCAGTTAGAGGTGGACCTGTA[A/C]ATAATTCAACTCTTGTTTTTGAGCTTGGACCCATG
Y	AX-166511006	Affx-88813864	AX-89818869	Affx-88813864	T	C	SNP	1	7777402	1	6307600	CTGTAAATAATTCAACTCTTGTTTTTGAGCTTGGA[C/T]CCATGGAGATACGAACTTTCTTGTTGAAGTTTTAG
Y	AX-123365108	Affx-88813866	AX-89876001	Affx-88813866	A	G	SNP	1	7788087	1	6318291	CTAAGCACCCCACACCCTTTCACCTTCAGGCATGC[A/G]TTCCTCTTAGCACACCTGGTTCTGAATGAGAAGGT
Y	AX-123360234	Affx-88813868	AX-89818870	Affx-88813868	A	G	SNP	1	7788965	1	6319169	TCCAGGAATTATTATACTGAACATCTCAAAAAAAG[A/G]AGGGGGTTCCTGCAACATACAAAGTTCATAAACGA
N	AX-123360235	Affx-88813869	AX-89818871	Affx-88813869	T	C	SNP	1	7789778	1	6319988	TGAATGTCAACTAAATTTGTACAACCCTCAAGAAC[C/T]AGCCTCTCAAGGTTTGGCATACCTGTGAAATCTGG
Y	AX-166520419	Affx-88813870	AX-89818872	Affx-88813870	T	C	SNP	1	7790243	1	6320453	AGCTAACTCCTCCACTTTAGGCAAGCATATGGCTA[C/T]GCTTCTAATTGCTTCTGTTCCCTATCAATTGAGAA
N	AX-166503083	Affx-88813874	AX-89780654	Affx-88813874	A	C	SNP	1	7813591	1	6343704	AGCATCATGGTGCTGTGCAATTCCTAAAGCATCTC[A/C]AAGTGAAAAGGTATTGGAACCATTTGCTCTCTTTC
N	AX-89876006	Affx-88813876	AX-89818874	Affx-88813876	A	G	SNP	1	7815811	1	6345924	ATCTTACCATCTCAGCAAACACAAACTTCCTATTC[A/G]GATCACGAACCAACGATTCCACAACAGAATCCAAC
Y	AX-123360236	Affx-88813880	AX-89818877	Affx-88813880	A	G	SNP	1	7825725	1	6355841	TACCACTATCCGATGCAGTTTTGTACCCATAAGCA[A/G]GATCAACTGATGTAAGATCAAGAAAGATTGTAAGA
N	AX-166520420	Affx-88813881	AX-89818878	Affx-88813881	A	G	SNP	1	7825964	1	6356080	GATAAATTTTTCCACTTACCATGAAAATCTAGTAT[A/G]ATGCAACATATGGCATATATCCAGAGAGGTATACT
N	AX-89818879	Affx-88813883	AX-89818879	Affx-88813883	A	C	SNP	1	7827522	1	6357638	AAAACAATCCAGTGACCCATCAACAATGACATAAG[A/C]CCAAAAAGCATGAGCTCTGCTAAATCAACATTGAT
N	AX-166517615	Affx-88813885	AX-89847142	Affx-88813885	A	T	SNP-SNP	1	7828563	1	6358679	GTAATGAAACTGTTGTAACAAGTTTGATATTTCTA[A/T]TCAGGGCAGTTCTAGGGGAATGTTTCATGTGGCTT
Y	AX-166511007	Affx-88813887	AX-89818880	Affx-88813887	T	C	SNP	1	7830156	1	6360272	TAGCCATAGCCAGACTTGATCAGATCCTTAGCTTC[C/T]TGAACATCAATAGTCACAACCTCTGCTCCAGAACT
N	AX-166520421	Affx-88813887	AX-89818880	Affx-88813887	T	C	SNP	1	7830156	1	6360272	TAGCCATAGCCAGACTTGATCAGATCCTTAGCTTC[C/T]TGAACATCAATAGTCACAACCTCTGCTCCAGAACT
N	AX-166511008	Affx-88813889	AX-89818882	Affx-88813889	T	C	SNP	1	7834912	1	6365029	TTGCTTTCTCAGTTTCATTTGATCGGCGCCCATTC[C/T]TTAGAGGCGAACAGGCATTCAAAGGGTCAGCATTA
N	AX-166520422	Affx-88813889	AX-89818882	Affx-88813889	T	C	SNP	1	7834912	1	6365029	TTGCTTTCTCAGTTTCATTTGATCGGCGCCCATTC[C/T]TTAGAGGCGAACAGGCATTCAAAGGGTCAGCATTA
N	AX-166511009	Affx-88813890	AX-89818883	Affx-88813890	T	G	SNP	1	7837516	1	6367633	TCCATCTAGAACTATGCAGGTGAATCTGGATTAGA[G/T]GAAAATGTGACATTCAAGGAGTGGACGTCTAGGAG
N	AX-166511010	Affx-88813891	AX-89818884	Affx-88813891	A	G	SNP	1	7837973	1	6368090	ATCAATTAAACATGTCCAAAAATTTGAACATTGGG[A/G]TTGGGACACTCTTCAACGCCGTGTATTGGATGCAG
Y	AX-166511011	Affx-88813898	AX-89818888	Affx-88813898	T	C	SNP	1	7858806	1	6390347	GGGATGCATCATGTCCACTTAAAATGGTGGGGAAG[C/T]TCCCCGGATGGTTGTCCGTTGGCTTCTTGCCCAAC
N	AX-166518640	Affx-88813899	AX-89860658	Affx-88813899	C	CTTG	Indel	1	7860705	1	6392247	AGTTGAGGGTCTAATCGGATATGGAGTTCAATGGC[-/TTG]TTGTTAGTGAGAGAATTAACCCTCTTCCATATTGG
N	AX-166509148	Affx-88813903	AX-89803361	Affx-88813903	A	AAAC	Indel	1	7864834	1	6396377	GATCAACTTTAGCTAGTTAGCTGCTTTAGCTCATA[-/AAC]AACAGTTTACATCCTCAAATTTATATGGTGATTTC
N	AX-89780660	Affx-88813905	AX-89780660	Affx-88813905	A	G	SNP	1	7867898	1	6399441	CACAATCAAAATAGTGTGGAAAGCAATTGAAGAAC[A/G]GGTTTTAGTTGAGTCTCCGGTTGCCAAACCTGCTA
N	AX-166503084	Affx-88813909	AX-89780661	Affx-88813909	A	G	SNP	1	7870469	1	6402012	GGGAGGCAAATCACATGCTAATCGATGTGGTAGAT[A/G]TGCTTTATATTTGGCTAGGCCAGTGCCAGGGTTGG
N	AX-166503085	Affx-88813911	AX-89780662	Affx-88813911	T	C	SNP	1	7875913	1	6407457	CTGTAAGCTTTAGGGCACGCATTTTTAAAGAACTG[C/T]GAGTACGAGCTGGGTGTGCAGGTGTCAGGAGTCGC
N	AX-166520423	Affx-88813913	AX-89818891	Affx-88813913	A	G	SNP	1	7881149	1	6412693	TTGCTCTGCTTTCTTCAACTGCTTCTTGTAGTCTA[A/G]CCAGTCAATGCCTGCAAGATACACCAAACACGAAA
Y	AX-123360238	Affx-88813915	AX-89818893	Affx-88813915	A	G	SNP	1	7882914	1	6414458	GGTGCATCATCACCAGTGATCTTAGTGTTGAGGAG[A/G]ACTCTGCCAGTGTAAGGGTTCTTAGGTTTGTACTT
N	AX-123524278	Affx-88813915	AX-89818893	Affx-88813915	A	G	SNP	1	7882914	1	6414458	GGTGCATCATCACCAGTGATCTTAGTGTTGAGGAG[A/G]ACTCTGCCAGTGTAAGGGTTCTTAGGTTTGTACTT
N	AX-89876023	Affx-88813919	AX-89876023	Affx-88813919	A	G	SNP	1	7887832	1	6419379	ACCAATGGGCCAATGATCCTCGTCTCTGTTGCACG[A/G]AATGTCCTGGCCAAATTCCCAACTGCTTTCAGGCA
N	AX-166520424	Affx-88813922	AX-89818897	Affx-88813922	A	C	SNP	1	7888510	1	6420057	TTCGAATTATTAGTAGCCACAACAACAGCATGAAT[A/C]GATGTAGCCTTGTTATAGGTCACACTATACTTGCT
N	AX-166520425	Affx-88813923	AX-89818898	Affx-88813923	A	G	SNP	1	7888555	1	6420102	TTGTTATAGGTCACACTATACTTGCTATGCTCCTG[A/G]ACTGTCTCGAAAGCAAGATGACTCACAAGCAATCG
Y	AX-89815295	Affx-88813926	AX-89815295	Affx-88813926	A	C	Indel-SNP	1	7904794	1	6437180	GCTCACCATTTTTGTGACATTGCCAGCAGTACTGT[A/C]CAGAATCTTCTATCTGAAAACAGTGGATAAGATCA
Y	AX-166520426	Affx-88813927	AX-89818899	Affx-88813927	T	C	SNP	1	7909576	1	6441959	ATCTAAACAAGTGGGTGCAATGTTCAGATCACCAA[C/T]AACAATTATCCTCCTCCCCTGACGCAGGAGAGACT
Y	AX-89818900	Affx-88813930	AX-89818900	Affx-88813930	A	G	SNP	1	7914418	1	6446804	TGGCAGGGGCGACCTACCGCTTCTAGTATCTCAAC[A/G]ACACGTGAATCTTTCAATTTCCAAGGGATATCTTT
N	AX-89876028	Affx-88813930	AX-89818900	Affx-88813930	A	G	SNP	1	7914418	1	6446804	TGGCAGGGGCGACCTACCGCTTCTAGTATCTCAAC[A/G]ACACGTGAATCTTTCAATTTCCAAGGGATATCTTT
Y	AX-166509642	Affx-88813932	AX-89806546	Affx-88813932	C	CAGCT	Indel	1	7925851	1	6458243	AAAGCTATCCTGGATTTTTTCCCATTTGTCCTTGC[-/AGCT]AGCTCATGTAAGTTTAACCTTCTGGGTTTTTATTA
N	AX-123360239	Affx-88813933	AX-89818901	Affx-88813933	A	G	SNP	1	7926257	1	6458648	GGTATATATCTTTATGCTTTTCAGTCTGGAATGAC[A/G]AGGTCAAGAGATGTTCCACGAAAGATGTTGCAAGG
Y	AX-123524279	Affx-88813933	AX-89818901	Affx-88813933	A	G	SNP	1	7926257	1	6458648	GGTATATATCTTTATGCTTTTCAGTCTGGAATGAC[A/G]AGGTCAAGAGATGTTCCACGAAAGATGTTGCAAGG
Y	AX-123357141	Affx-88813934	AX-89780666	Affx-88813934	T	C	SNP	1	7928053	1	6460444	CTAGAGTGGGCAACAAACCTCAAATCATTCTCAGA[C/T]TTCCCTGTCTCGAGAAAAGTTGTCAAGTCCCAAAC
N	AX-123614525	Affx-88813935	AX-89806547	Affx-88813935	A	AGTAC	Indel	1	7930278	1	6462674	CCTTATCTTGCTTATTTCACAATCACATTAAGATA[-/GTAC]GTGACACTAAAATAGTAAAATTATCAATCAAGAAT
N	AX-166511012	Affx-88813942	AX-89818904	Affx-88813942	A	G	SNP	1	7944757	1	6477156	TACTGTGGGGCAATTCCATTGATCCGGTTAATCAC[A/G]TGCTCAACATTGTTAATGACCTTCTGCTTGAAATC
N	AX-89818905	Affx-88813943	AX-89818905	Affx-88813943	T	C	SNP	1	7945199	1	6477598	TTTGCATCATATGCAGGATGAAAATCAGTTTGAAA[C/T]ATTTTTCCTGTGTTCTTGGCAAAGAGTATTTTGTT
Y	AX-89818906	Affx-88813944	AX-89818906	Affx-88813944	T	C	SNP	1	7946337	1	6478736	ACAACATGAAAGTCACGCAACACCCTGCTTTCCTC[C/T]TCCAGCTTCAAAACTGCAGGAAACCTGTCTTCGAC
N	AX-123365110	Affx-88813945	AX-89818907	Affx-88813945	A	G	SNP	1	7946370	1	6478769	TCTTCCAGCTTCAAAACTGCAGGAAACCTGTCTTC[A/G]ACATTGCTCTGGAGGACATTTTTCCAATGTTTTAA
Y	AX-166511013	Affx-88813945	AX-89818907	Affx-88813945	A	G	SNP	1	7946370	1	6478769	TCTTCCAGCTTCAAAACTGCAGGAAACCTGTCTTC[A/G]ACATTGCTCTGGAGGACATTTTTCCAATGTTTTAA
N	AX-123357143	Affx-88813951	AX-89780669	Affx-88813951	T	C	SNP	1	7947834	1	6480233	CCAGTGGGGAATTTGGTCAAGATATTTATCAAAAG[C/T]CCTACCAACAGGTTCATTAGGAGTATCAAAGCTGA
N	AX-166511014	Affx-88813953	AX-89818912	Affx-88813953	A	G	SNP	1	7948140	1	6480539	CATCCTTTAGGCAAATTTTTGAACAGGCTGATGGC[A/G]TTAGAGTATGCATGATTAGCACCTTCAGAGTCACT
N	AX-166511015	Affx-88813954	AX-89818913	Affx-88813954	T	C	SNP	1	7948783	1	6481182	TTTGTAGTTGTAAAATCTTTGAATGCATCTATGAC[C/T]GCATTATACATTTCATTTCTCCATTGTAGTAAATC
N	AX-123365112	Affx-88813955	AX-89818914	Affx-88813955	T	G	SNP	1	7948843	1	6481242	TGTAGTAAATCATACCAGACAGACATGTTATCCCA[G/T]TCATTAGGAGTTCTCAATCTCCAAGTTTCAAGGAT
N	AX-166511016	Affx-88813955	AX-89818914	Affx-88813955	T	G	SNP	1	7948843	1	6481242	TGTAGTAAATCATACCAGACAGACATGTTATCCCA[G/T]TCATTAGGAGTTCTCAATCTCCAAGTTTCAAGGAT
N	AX-166503086	Affx-88813956	AX-89780670	Affx-88813956	A	G	SNP	1	7948894	1	6481293	AATCTCCAAGTTTCAAGGATGTCTTTGAGGTCAGC[A/G]TAAAGATTTCCATGGACACCGACCACAGAGTTTGC
N	AX-123365113	Affx-88813957	AX-89818915	Affx-88813957	A	G	SNP	1	7949242	1	6481641	ATGTATGCCCAATCCGGCAATTTCCAAAGACTGTC[A/G]AGTAGTATTTCATAATTCTCAATACTCTTTCCGAA
Y	AX-123360240	Affx-88813959	AX-89818916	Affx-88813959	A	G	SNP	1	7949816	1	6482215	ATGCTACCTGATCTTCCTTCTGTAAAGTTATCCAG[A/G]CAATGGGAAACACCAACACCCACAAATGATATGCA
Y	AX-123365114	Affx-88813963	AX-89876045	Affx-88813963	A	C	SNP	1	7951940	1	6484339	GTAGTTTCACATCAGGTGGAGTGGTAGCCGCTTCC[A/C]GAGGAAAAGCAACAAAGACCATTTTCAACATGGAG
Y	AX-166520427	Affx-88813964	AX-89818917	Affx-88813964	A	G	SNP	1	7953057	1	6485456	AGCGCTTAAGATCAGCACTAGAAGGGCCTGGATTA[A/G]ATTCAGTGATCTGATTGGTAACATCACCATCAGCT
N	AX-89876047	Affx-88813965	AX-89818918	Affx-88813965	A	G	SNP	1	7953083	1	6485482	CCTGGATTAAATTCAGTGATCTGATTGGTAACATC[A/G]CCATCAGCTACCACTTTCATTTCATTTTGTCGTTG
N	AX-123360241	Affx-88813966	AX-89818919	Affx-88813966	A	G	SNP	1	7954531	1	6486930	AGACTCAAAAAATGCAACAGAAGTGCCTTTTTATA[A/G]TTGGGTGGATAACCTTCTGCAACCTGAAGAAAAGA
N	AX-166511017	Affx-88813968	AX-89818920	Affx-88813968	A	G	SNP	1	7955144	1	6487543	GGCACAAGGCGTAAAACTTACCTGCACCAAGTCCA[A/G]CTCCTGTTCATTCTGCAAACGTGATAGTCTTGCGT
N	AX-166520428	Affx-88813968	AX-89818920	Affx-88813968	A	G	SNP	1	7955144	1	6487543	GGCACAAGGCGTAAAACTTACCTGCACCAAGTCCA[A/G]CTCCTGTTCATTCTGCAAACGTGATAGTCTTGCGT
N	AX-166503087	Affx-88813969	AX-89780674	Affx-88813969	A	C	SNP	1	7955354	1	6487753	TGGGATCAAACTATCAGGTGGAGGCTTAGCAAGAC[A/C]TTCGTCACCCAACAAAGCCGTAGGTGGAGTTGCTG
N	AX-89876050	Affx-88813971	AX-89876050	Affx-88813971	A	G	SNP	1	7956840	1	6489239	AAGGAGCTCAACCCTACCTGTCGTAAGCCTTCCTT[A/G]GCCACAGCAACTATTTCGGGCGTTCGACATGTCAA
Y	AX-123360242	Affx-88813972	AX-89818921	Affx-88813972	T	C	SNP	1	7957005	1	6489404	ATGCAAGCGGTTCGAAGCTTATTTAGTGATGTGGC[C/T]ACTTTTGGGTTCATGAACTTCACAACCCATACAGT
N	AX-166520429	Affx-88813974	AX-89876052	Affx-88813974	T	C	SNP	1	7957380	1	6489779	TCACTACCAGTTCTACTAGCCAAAAGTGCCAAACA[C/T]GACTGCACATTCTTCCTCACAATAACAGAAGCATT
N	AX-166511018	Affx-88813976	AX-89818923	Affx-88813976	A	G	SNP	1	7957893	1	6490292	AGAAACAGAAGTGTTTCACAGAAAACATTTAAAGC[A/G]CTAAGGGCAGCTTTGGCATGAAGCCTATTTTCATC
Y	AX-166520430	Affx-88813978	AX-89876056	Affx-88813978	A	G	SNP	1	7958067	1	6490466	TTTGAAGGAAGCATAGGACCACCAAGTGCAGCAGT[A/G]GAAACTGAAGTACTACTTGAGGATGAGTCAATATG
N	AX-166503088	Affx-88813980	AX-89780676	Affx-88813980	T	C	SNP	1	7959051	1	6491450	GAGCTCAAGCGTGCAGGTAAGGTTAAGCACAATTC[C/T]AGCAAAAGGTCCTTCATATCTTCCCCAGCTGGACC
N	AX-166511019	Affx-88813981	AX-89818925	Affx-88813981	A	G	SNP	1	7959267	1	6491666	GCATTTTTCATGCAGACTTCCATTATAATAGGCAC[A/G]TGAGGTTGCAAAATACGTTCAAACTCTTGAGGCGC
N	AX-123360243	Affx-88813982	AX-89818926	Affx-88813982	T	C	SNP	1	7959941	1	6492340	AAACAGAATATTAATACCTGCGAGCGAGGTACGTG[C/T]GCATGTGTGATACTCCATATGATGGTCTTCATTCC
Y	AX-123524281	Affx-88813982	AX-89818926	Affx-88813982	T	C	SNP	1	7959941	1	6492340	AAACAGAATATTAATACCTGCGAGCGAGGTACGTG[C/T]GCATGTGTGATACTCCATATGATGGTCTTCATTCC
N	AX-166517616	Affx-88813985	AX-89847144	Affx-88813985	A	T	SNP-SNP	1	7961743	1	6494466	GAAAGGTCCGCTCGAACATGATGAACAATCTCCGC[A/T]AGTAGACTATATGCCAAAGGCCTCAATGTCTCGAA
N	AX-86815401	Affx-88813987	AX-89780678	Affx-88813987	A	G	SNP	1	7962297	1	6495020	TTACATATGCTTTCTTCATGCTGCCTGATATAATC[A/G]GCAAAGCTCTTCAACAGGTATGTCAGAAACGAAAC
Y	AX-166503089	Affx-88813991	AX-89780681	Affx-88813991	A	G	SNP	1	7966540	1	6499262	CGAGTTGAAGTCCTAACAGCTGAGCTTGAAGAAAC[A/G]CAGCAACATCTGGAGAAAGCGAGAGAAGAAAACAA
Y	AX-123363532	Affx-88813992	AX-89847145	Affx-88813992	T	C	SNP-SNP	1	7966588	1	6499310	GAGAAAGCGAGAGAAGAAAACAAGTTAATAGCATA[C/T]TCCATAAAGTCTCTCAGAGATGATCTCGACCATGC
N	AX-166509149	Affx-88813995	AX-89803362	Affx-88813995	C	CTTG	Indel	1	7976527	1	6509251	GGGAGGGTTTCAATCTCCTGGTGATATTCTTCTTC[-/TTG]TTCCATGAAGGTTTGTTCTTTCATGTCAAAGAAAG
N	AX-166503090	Affx-88814000	AX-89780683	Affx-88814000	T	C	SNP	1	7989563	1	6522285	ATGCATATGTAAAAGGTGAAGCTGATTAAAATTAC[C/T]CTTTCCCAAAAAGCGTAGGTGTCGTTGCCTGCTTT
N	AX-89876064	Affx-88814002	AX-89818933	Affx-88814002	T	C	SNP	1	8004406	1	6537520	TTTGTTTTTGCTGATACTTATAGAGGTTCTTATAG[C/T]ATCAGCATACCCCAAGTGCAGCAGTTTTACAACTC
Y	AX-166511020	Affx-88814004	AX-89818934	Affx-88814004	A	G	SNP	1	8005154	1	6538268	AGCAGTTCTCTATAGCGACTACATGGTTGCATCAC[A/G]GACTGAAATGCTGTATTGTGATGGCAAAATTTACA
Y	AX-166509643	Affx-88814005	AX-89806548	Affx-88814005	C	CGCCG	Indel	1	8005737	1	6538852	AATTAAGGCTAATTACTCTTTTTGAAGCTAGCTAC[-/GCCG]GCCCCTGGTGACATTAGTCATTTATGTTATTGATG
Y	AX-89876068	Affx-88814013	AX-89818936	Affx-88814013	T	C	SNP	1	8016994	1	6550105	CCCGATGATGTTCCCAAAGGGCATTTCGCTGTGTA[C/T]GTAGGCGAAAACAGAAGCCGATATATAATCCCGAT
N	AX-166503091	Affx-88814014	AX-89780689	Affx-88814014	A	G	SNP	1	8021861	1	6554970	TGCATTTCTTTATTATCTGTTCCATGTTGCCTAAT[A/G]AGGTTCTTATAGTAGTTCATGTCCTTGACAGTTCC
Y	AX-166511021	Affx-88814024	AX-89818938	Affx-88814024	A	G	SNP	1	8033619	1	6566729	AGCCATAGCAAAGGAGCGCAAGATAAAGAAAGAGC[A/G]GGAGATATTTCTTGATGGTCTTGATCCGGATGTTG
Y	AX-123363533	Affx-88814025	AX-89847147	Affx-88814025	C	G	SNP-SNP	1	8033677	1	6566787	GATCCGGATGTTGAGGAGGAAGACGTGAGATGGGT[C/G]TTTGAGAGGATTGGAGGGATAGTTGAGGTCAGGTT
N	AX-166511022	Affx-88814027	AX-89818939	Affx-88814027	A	C	SNP	1	8034329	1	6567439	TATAAGAGGCTTCAGCAGCCTGATGTTATATTTGG[A/C]CACCCTGAAAGAACTGCCAAAGTGGCCTTTGCTGA
N	AX-166520431	Affx-88814027	AX-89818939	Affx-88814027	A	C	SNP	1	8034329	1	6567439	TATAAGAGGCTTCAGCAGCCTGATGTTATATTTGG[A/C]CACCCTGAAAGAACTGCCAAAGTGGCCTTTGCTGA
Y	AX-123357146	Affx-88814028	AX-89780691	Affx-88814028	T	C	SNP	1	8035784	1	6568894	TGATAGAACACAAGGCATGAAGCGTCCATTCCATA[C/T]GAGAGTAAGCTTTTCTTTATTTCTTTTTGTTGTTC
N	AX-166519006	Affx-88814039	AX-89806550	Affx-88814039	T	TATTA	Indel	1	8056363	1	6590327	AGCGTAACCAGCAAAAGGAGATCGCGGGGGGTCCT[-/ATTA]ATTAGGATCTTAACCCTTTTTGACATCGACCGCCC
N	AX-166511023	Affx-88814049	AX-89818941	Affx-88814049	A	G	SNP	1	8061959	1	6595926	CATGTATATAGAATCACTTGGATCACCTTTAAATA[A/G]CAGGAAGAAGTATGTCCTGTGTACCAATGACACAT
N	AX-166511024	Affx-88814050	AX-89818942	Affx-88814050	T	C	SNP	1	8064381	1	6598349	TTCAACTCATTCTCTAATTTAGCCAATTCTTTTTG[C/T]AAATGCTTCACCAATGTTTTATCTGACATGACTAC
N	AX-166520432	Affx-88814051	AX-89818943	Affx-88814051	A	C	SNP	1	8065249	1	6599219	TAGATGTCTAAGGAAACCAGCATACCAATCTGAGA[A/C]TCTGATGTGATCTAGAGCTTGCTTCATTTAAAGAT
Y	AX-123360247	Affx-88814053	AX-89818945	Affx-88814053	A	G	SNP	1	8065795	1	6599765	ACCTTATCTATGTAGTCATATATATCTGCAACAGC[A/G]TACTCGGTGATTCCACTCATGGTGTATGTCTTTCC
Y	AX-166511025	Affx-88814057	AX-89818946	Affx-88814057	T	C	SNP	1	8076252	1	6609988	CTGTCACTCAATCATGTGTCTTTGCTATGCAGATC[C/T]GTGTGGGACTCTATGAGGTTCTATGAAGAAGTGTT
N	AX-166511026	Affx-88814058	AX-89818947	Affx-88814058	T	C	SNP	1	8076767	1	6610503	CATGACCCAGATGGGTACATGATCGAGCTCTGCAA[C/T]TGTGAGAACATCCCCATCATTCCCGTCTCTTCTTG
Y	AX-89876080	Affx-88814062	AX-89876080	Affx-88814062	T	C	SNP	1	8079060	1	6612807	CAACACCCCAAGCCTTCATATCATCCATAACATCC[C/T]TTGCCTTGTTCAACTTCCCAACTTTACACAACCCA
N	AX-123601901	Affx-88814063	AX-89818948	Affx-88814063	T	G	SNP	1	8082311	1	6616062	ACGCTTGTGAAAGCGCAGCCGCGATCGTTTTCTGT[G/T]CTGCCGACGAAGCTGCTCTTTGCCGTGCCTGTGAT
N	AX-166520433	Affx-88814064	AX-89876081	Affx-88814064	A	G	SNP	1	8083357	1	6617109	AAGACCCAGCATCCCAACCCCCCATTGACCAAGGT[A/G]AGACCAGAAGAGTACAACATCAGCAACCGAGAATG
Y	AX-166503092	Affx-88814069	AX-89780700	Affx-88814069	A	G	SNP	1	8087679	1	6621431	ATATGTTTGCAGGAGGCATATGCCAAATACGTTAA[A/G]GGGTATTACCTTGGAACTTTTGGTGTTGATGTTGA
N	AX-123360248	Affx-88814070	AX-89818951	Affx-88814070	T	C	SNP	1	8087793	1	6621545	GGGAGTTCTGATCGTTTGTGGTGGTTCCAAGTTTG[C/T]ACTGAAGTTGCCTATTTTCAGGTGGCACCTGCAAA
N	AX-166511027	Affx-88814071	AX-89818952	Affx-88814071	A	G	SNP	1	8088667	1	6622419	AATAGTTTTCACAAATGGCTCACAGGATCCCTGGC[A/G]TCATGCATCCAAACAGACTTCATCTCCAGATAGTA
N	AX-166511028	Affx-88814073	AX-89818953	Affx-88814073	A	C	SNP	1	8091379	1	6625132	CAGCAATCAATATCCTCAATCACCAGAATAGAACG[A/C]TTTGATGTAGAAAGCAATACCCTCCTCAATTCACA
N	AX-89876086	Affx-88814073	AX-89818953	Affx-88814073	A	C	SNP	1	8091379	1	6625132	CAGCAATCAATATCCTCAATCACCAGAATAGAACG[A/C]TTTGATGTAGAAAGCAATACCCTCCTCAATTCACA
N	AX-123357147	Affx-88814074	AX-89780701	Affx-88814074	T	C	SNP	1	8091444	1	6625197	TTCACAATTACTGTGAATGCTAGAAAGCTCTAAAT[C/T]ATAGACATCAAACTTGAGATAGTTAGCCATGGCTG
N	AX-166503093	Affx-88814078	AX-89780703	Affx-88814078	T	G	SNP	1	8091967	1	6625720	GTGTCGGTGATTTCTTCACCTTTTTCCATGGCAAT[G/T]CTAATGCTCTTTTTCCTTGGTGTTTTGCTAATTTT
N	AX-166511029	Affx-88814083	AX-89818955	Affx-88814083	T	C	SNP	1	8094838	1	6628591	GGGGAAGATCATGCGCCACTGCACTTTGATATCCT[C/T]GAAAGTGTCAGTGATTTCTTGGTTGGTGGTAACAG
N	AX-166520434	Affx-88814083	AX-89818955	Affx-88814083	T	C	SNP	1	8094838	1	6628591	GGGGAAGATCATGCGCCACTGCACTTTGATATCCT[C/T]GAAAGTGTCAGTGATTTCTTGGTTGGTGGTAACAG
N	AX-166520435	Affx-88814086	AX-89876091	Affx-88814086	A	C	SNP	1	8098884	NA	6632643	TCTTCCAAGCCTTGCCAACTCTCTTGTAGAACTCC[A/C]TCCTCTTCACAAACTTGTCCAAATCCTCTATGATC
N	AX-166503094	Affx-88814089	AX-89780706	Affx-88814089	A	G	SNP	1	8103857	1	6637620	TTGGACTAATAAAATTAAAGGGGAACAGACATGTG[A/G]TGTTCCGGATACAAATAATAATTTCTCTTTTCTTC
N	AX-166503095	Affx-88814090	AX-89780707	Affx-88814090	A	G	SNP	1	8104653	1	6638415	CGGGTGGACCATGCAACAAGTAACCTCTTTTCCAA[A/G]CCTTCCCAACCTTCCTGTAAAAATTCTTCCTCCTG
N	AX-166520436	Affx-88814093	AX-89876094	Affx-88814093	T	C	SNP	1	8107242	1	6641005	GGGAATAGAAGAGTGAGGGCTCCCAGCAATACAAA[C/T]GCAATGGAAGTTTTTACAATGAACTGTGTGGCTGG
N	AX-123357148	Affx-88814094	AX-89780708	Affx-88814094	T	G	SNP	1	8107269	1	6641032	AATACAAATGCAATGGAAGTTTTTACAATGAACTG[G/T]GTGGCTGGAGTGCGGAACCTACTTCTCACAGCCTG
Y	AX-123614285	Affx-88814096	AX-89803368	Affx-88814096	A	AGAG	Indel	1	8110098	1	6643862	CTACCATAGTCTCAATCATCATAAACATATACTTA[-/GAG]GAGTACAGCAACAACATATGATAACAAGGATACTA
Y	AX-166503096	Affx-88814097	AX-89780709	Affx-88814097	A	G	SNP	1	8110594	1	6644357	TTGCACTTTATATACGAATTGAAATCGGCATGACC[A/G]GGATAATTTGTATGCAGAACAAACTTCTTGACTTT
N	AX-123357149	Affx-88814098	AX-89780710	Affx-88814098	T	C	SNP	1	8110785	1	6644548	CGGGTGAAGTAATTGTAAAAGTAATCACCACACAA[C/T]GTTGTCCGCGGGCGAGGATCTGAGCCAGAATGAAT
N	AX-166511030	Affx-88814099	AX-89818959	Affx-88814099	A	C	SNP	1	8112308	1	6646072	TGGAAACCATGATCAGGAAAGCTGATGACAATGTC[A/C]AACTTCAGAGGCTCCTGCACACAAAAAATCACAGT
N	AX-89876096	Affx-88814099	AX-89818959	Affx-88814099	A	C	SNP	1	8112308	1	6646072	TGGAAACCATGATCAGGAAAGCTGATGACAATGTC[A/C]AACTTCAGAGGCTCCTGCACACAAAAAATCACAGT
N	AX-89876098	Affx-88814102	AX-89818960	Affx-88814102	T	C	SNP	1	8119364	1	6653143	AGCTGGGAGTATCTCTTCAAAGTGTACTGGATTCT[C/T]CTGAAAGGGCAACTATCATTAACTGTGGATGATCT
Y	AX-166503097	Affx-88814103	AX-89780712	Affx-88814103	A	G	SNP	1	8119713	1	6653492	TTCAGGCACTTATGCTGGAGTACATAAAGAAAAAC[A/G]ATCTTCGTGACCCTCATCGAAAATGCCAAATTATT
Y	AX-166503098	Affx-88814104	AX-89780713	Affx-88814104	T	C	SNP	1	8121414	1	6655193	GAAATGGATCCAAGTTATGAGTCTGAAGACAATGC[C/T]GGAGAAGACAATAAACTAGGTCCCTACATTCATTT
Y	AX-166511031	Affx-88814105	AX-89818961	Affx-88814105	T	C	SNP	1	8121911	1	6655690	GGATCCCTCTGGAAAAATTCAGGGACCATTTGCTA[C/T]GGTACAGTTGTGTAAATGGGATACAACTGGAGTCT
N	AX-166511032	Affx-88814107	AX-89818962	Affx-88814107	A	G	SNP	1	8123236	1	6657015	AAATTCTTACTGAAACCAATGAGTTTTGCACTTTA[A/G]CTGCTGATGAGTCAGTTTCAGATCTTCTGGCTGAA
Y	AX-166520437	Affx-88814107	AX-89818962	Affx-88814107	A	G	SNP	1	8123236	1	6657015	AAATTCTTACTGAAACCAATGAGTTTTGCACTTTA[A/G]CTGCTGATGAGTCAGTTTCAGATCTTCTGGCTGAA
N	AX-166520438	Affx-88814108	AX-89818963	Affx-88814108	T	C	SNP	1	8123837	1	6657616	GATGACAGGTGTACTTTCATCCAAAAGCACAGAAG[C/T]GGAGAGAAAGCCTAGTAATGTGTCAGTTAATCAAC
Y	AX-166511033	Affx-88814109	AX-89818964	Affx-88814109	A	G	SNP	1	8126461	1	6660243	ACTCCGAGTCTTCTAAGTTTAAGAAGGAAAAACAA[A/G]TTGAGTACGAACAGGAATGCCGTGAGAAACTATCC
Y	AX-123363537	Affx-88814116	AX-89847153	Affx-88814116	C	G	SNP-SNP	1	8129908	1	6663692	AGTGAATCCTTCTTAAGTCCCTATTTTGTGGACAT[C/G]GACTGATTTGATTGGTTGAGGGGAGATGTGTGCAC
N	AX-123614286	Affx-88814117	AX-89803369	Affx-88814117	G	GATT	Indel	1	8133022	1	6666811	GTACATCGAGAACAATGGCATAAGGTTCATATGTG[-/ATT]AATTATCCAAACTCGAACAGACTCGTCGATCTGCA
Y	AX-123366845	Affx-88814118	AX-89904305	Affx-88814118	A	T	SNP-SNP	1	8134908	1	6668696	CTTGGTAATCATCATTTTGCATTGTTCAATTGATT[A/T]GGGTGGTAATCGAATCGGAGAGGTTATGGTTTGGT
N	AX-166520439	Affx-88814119	AX-89818968	Affx-88814119	T	C	SNP	1	8137716	1	6671505	ATATGATGTCATAAAATACTGCATAGGTACACTTG[C/T]TTCCATATCTGCTGTTGGTCTTGCTGTACTACGTA
N	AX-89818969	Affx-88814120	AX-89818969	Affx-88814120	A	G	SNP	1	8139607	1	6673396	GAATGAACTCGAAGTTACTACCCTTGAAGTCAGGA[A/G]CTCCTTCCTTCAAAAACCTCGAGGGTTTGAAACAC
N	AX-123363538	Affx-88814124	AX-89847154	Affx-88814124	A	G	SNP-SNP	1	8164198	1	6698697	ATATTTTAATTCATAGGATAACATTTTGATCGACT[A/G]GAATTAGACGGAGAGGAAACAAAAGGACTTATCTA
N	AX-89806552	Affx-88814126	AX-89806552	Affx-88814126	A	ATGTT	Indel	1	8168064	1	6702565	ATTGTTTGATAAGTTGAGAAATGAAAGGTTTGTCA[-/TGTT]TGTTGCCAATCCAATGAGGCAGCTTTCCTGCCAAG
N	AX-166503099	Affx-88814127	AX-89780715	Affx-88814127	A	G	SNP	1	8168193	1	6702693	GCCCTTTAAGACCAGTTTTTGCCAACAGTAGGCGA[A/G]AAAGCTTCAACTTTGAGAACCAGCTTGGTATGCTA
N	AX-166511034	Affx-88814128	AX-89818972	Affx-88814128	A	C	SNP	1	8168273	1	6702773	AAAGGGTTGGATGAAAGGTCCAGAGTTTGCAGCAT[A/C]TGTAGTTTTGCTAGCTGAGGAGGAATTTGACCCGA
N	AX-166509150	Affx-88814129	AX-89803370	Affx-88814129	A	AAAGTG	Indel	1	8168842	1	6703343	CCAGATAATCTATTTCCTGATAGGCCTAGTTCCAA[-/AAGTG]AACTTACAGCTTCAAAAACAGAGTTGGGAACAGAA
N	AX-166520441	Affx-88814131	AX-89876111	Affx-88814131	A	G	SNP	1	8172292	1	6706792	GCAAGTGAACTTGTCGCTGAAGAGAGAGTCGCAGG[A/G]GTCGAGTTTGAAGTCCCATGAGCTAATGCAGGAGC
N	AX-166520442	Affx-88814132	AX-89876112	Affx-88814132	T	C	SNP	1	8176314	1	6710816	TTCGTTTAGCAATCCCTTTGTGATACAGTTGAGAG[C/T]TGCATCTGCTAATCTGCATTGGCTTGCGGCAGCCA
N	AX-89818977	Affx-88814143	AX-89818977	Affx-88814143	T	C	SNP	1	8207112	1	6740783	AAAATCTTATTAGCTTTCATCAATCCAAGGCCATG[C/T]TCTGCACTAATGCTTCCACGATGTCCAGATGTCCA
Y	AX-166503100	Affx-88814145	AX-89780721	Affx-88814145	T	C	SNP	1	8211234	1	6744909	GTAAAAAAATTATGATCACAGTAAATTACCTGAAC[C/T]GGAGCTGTGGATTGACTTGCCGGAATTAGGAGAAA
N	AX-166511035	Affx-88814148	AX-89818978	Affx-88814148	A	C	SNP	1	8212462	1	6746138	CTCCGAAAGTTGTGGTTTTGGGATGTATGGCGGAG[A/C]GGTTGAAGGACAAGATACTAGATGCAGATAAAATG
N	AX-166503101	Affx-88814150	AX-89780724	Affx-88814150	T	C	SNP	1	8213894	1	6747570	AGGACCCAATAAGAGAGCTCCGGATACAGAACTAA[C/T]TGGCAAGAGCGACAGAGGTCATAGAGTTTCTTTTG
N	AX-89876117	Affx-88814152	AX-89876117	Affx-88814152	A	G	SNP	1	8215488	1	6749164	GGCACGTCGAATCGGGCCGATGGGTTCTGAATCGG[A/G]CCCTTCATAAGTAGTCCACATCTGGCGGGTGAGGA
Y	AX-123366846	Affx-88814153	AX-89904306	Affx-88814153	A	T	SNP-SNP	1	8218259	1	6752222	AATCTGATTTGGAATGAACCAATGCATTGACAAGC[A/T]TACAAACATTGATAAAAGAAATGTACTTTGTTCAT
N	AX-166520443	Affx-88814155	AX-89876118	Affx-88814155	A	G	SNP	1	8223472	NA	NA	AGACACTACTGACAGACTTGGAGGAGGAGATCCCA[A/G]AAGATTTGAATAAGAAGCTAAAAGAACTCGACAAG
Y	AX-166503102	Affx-88814156	AX-89780725	Affx-88814156	T	C	SNP	1	8224243	1	6758560	CAGAAAAGGACAACGACATCTCTGACTTATGAAGC[C/T]AGATTACAGGTTGCCTGACGGCCATCAGATCAGCA
Y	AX-123357152	Affx-88814162	AX-89780728	Affx-88814162	A	G	SNP	1	8227067	1	6762088	TGTTCTCAAGAGAGAATTTGAAGAGTTCATCAAAG[A/G]CTTGATCTGCTTACCTATCAAGCTCCCTGGAACTA
Y	AX-123360249	Affx-88814164	AX-89818982	Affx-88814164	T	C	SNP	1	8229121	1	6764148	ATTCCAAAAGGATGGTGTGTTTTGGCGTCTTTCAG[C/T]TCTGTCCACATGGATGAAGAGAACTATGAACACCC
N	AX-123524284	Affx-88814164	AX-89818982	Affx-88814164	T	C	SNP	1	8229121	1	6764148	ATTCCAAAAGGATGGTGTGTTTTGGCGTCTTTCAG[C/T]TCTGTCCACATGGATGAAGAGAACTATGAACACCC
Y	AX-123365118	Affx-88814166	AX-89818984	Affx-88814166	T	C	SNP	1	8229406	1	6764433	CAGAGACTGTGTCCTGGTTTGGAACTATCTCGTCT[C/T]GAATTATCAATCTTCCTTCATCATCTTGTCACCAG
N	AX-166511036	Affx-88814166	AX-89818984	Affx-88814166	T	C	SNP	1	8229406	1	6764433	CAGAGACTGTGTCCTGGTTTGGAACTATCTCGTCT[C/T]GAATTATCAATCTTCCTTCATCATCTTGTCACCAG
N	AX-123360250	Affx-88814167	AX-89818985	Affx-88814167	A	C	SNP	1	8229577	1	6764604	CTTTTTCTTGCAGATGGGTAGCTGAGAAAGATGAC[A/C]TTGTCCACTTTCCGACGGTCAAAATGAAGAGGAAG
Y	AX-123363539	Affx-88814169	AX-89847157	Affx-88814169	T	C	SNP-SNP	1	8231059	1	6766086	CAATCTCCTCGCGAACTCCTTCTGCAACAGCAGTG[C/T]CGCGCTCCGAAACCTCCTTCCCCCATACACCAATT
Y	AX-166520444	Affx-88814171	AX-89818986	Affx-88814171	A	C	SNP	1	8238921	1	6773950	CACTCTCCATGCGTAGCTTTCAGTTGCAGCCACGC[A/C]GTGACAACCGTCGACACATGCGAGAGTTATGAGTT
N	AX-89818986	Affx-88814171	AX-89818986	Affx-88814171	A	C	SNP	1	8238921	1	6773950	CACTCTCCATGCGTAGCTTTCAGTTGCAGCCACGC[A/C]GTGACAACCGTCGACACATGCGAGAGTTATGAGTT
Y	AX-89818987	Affx-88814172	AX-89818987	Affx-88814172	A	C	SNP	1	8239847	1	6774875	TGTGTTTTGTTGGGTTTCAGTACAATTTTGAAGGG[A/C]GGTATGATCTGGTGAGATTCCTAAAGACCGTACAG
N	AX-89818988	Affx-88814173	AX-89818988	Affx-88814173	A	G	SNP	1	8240524	1	6775552	TTTGGGGTTCAGATTGAGAATGAGTACGGAGTACA[A/G]AGCAAGTTGTTTGGAGCTGCTGGACATAATTACAT
N	AX-166511037	Affx-88814175	AX-89818989	Affx-88814175	T	C	SNP	1	8241269	1	6776297	GACTGAAACAGTACCATGGAGGAACCAACTTTGGA[C/T]GCACAGCAGGGGGACCTTTCATCACTACCAGCTAT
N	AX-89780729	Affx-88814178	AX-89780729	Affx-88814178	T	C	SNP	1	8241707	1	6776735	TGGTCATCTGAAGGAGCTTCATAAGGCTATTAAGA[C/T]GTGCGAACGGGCTTTAGTTTCAGCTGATCCTATCA
N	AX-166511038	Affx-88814179	AX-89818990	Affx-88814179	T	G	SNP	1	8243043	1	6778071	GGTGGACACTTTGAGGCATATAACACAGGAATCCT[G/T]GGCCCAGTTGCACTTCATGGACTAAACCAGGGAAA
Y	AX-166520445	Affx-88814180	AX-89818991	Affx-88814180	T	G	SNP	1	8243241	1	6778269	CATGAACCTTGTATCTCCAGATAGTATTTCCTCTG[G/T]TGATTGGCTGCAAGCATCATTAGTTGCTCAAAAAC
N	AX-166511039	Affx-88814181	AX-89818992	Affx-88814181	A	G	SNP	1	8243480	1	6778508	GGTCAGATATGGATTAACGGGCAGAGTGTTGGAAG[A/G]TACTGGACTGCATTTGCTAATGGTGATTGCAACGG
N	AX-166520446	Affx-88814181	AX-89818992	Affx-88814181	A	G	SNP	1	8243480	1	6778508	GGTCAGATATGGATTAACGGGCAGAGTGTTGGAAG[A/G]TACTGGACTGCATTTGCTAATGGTGATTGCAACGG
Y	AX-166511040	Affx-88814187	AX-89818995	Affx-88814187	A	G	SNP	1	8250344	1	6785383	TTAGAGAGAAGAGACTGGTTCAGATAAGGGAAGTG[A/G]CTCTGTATCCCTCCCCGGCTAAGGTTACGGGCGTC
N	AX-166511041	Affx-88814191	AX-89818996	Affx-88814191	T	C	SNP	1	8254361	1	6789401	ATCCTTCATCTGCAGGCATTGAGGGAATTTCACCC[C/T]TTTCCTTGCCAAACTTGCTCTCTTCATTTTTCCCC
N	AX-166520447	Affx-88814191	AX-89818996	Affx-88814191	T	C	SNP	1	8254361	1	6789401	ATCCTTCATCTGCAGGCATTGAGGGAATTTCACCC[C/T]TTTCCTTGCCAAACTTGCTCTCTTCATTTTTCCCC
N	AX-166503103	Affx-88814192	AX-89780734	Affx-88814192	A	C	SNP	1	8254916	1	6789956	ACACCAACCGCGTAGAGAATAGCGAAAACTTCACC[A/C]CCAGAATGGATCTGCCAAGCTTGTGATTCTCTTTC
N	AX-166520448	Affx-88814193	AX-89818997	Affx-88814193	A	G	SNP	1	8255046	1	6790086	CAGAGAGGCGAGCTGGGTAGTTCTTCAAAACAGGT[A/G]CTTGTAGCACAATCCAGCTAGACCAACACAGACAA
Y	AX-166511042	Affx-88814194	AX-89818998	Affx-88814194	A	C	SNP	1	8256001	1	6791041	CTTACACCCATGTTAAGCACAGTTCTGAGGATGAC[A/C]TGTTGCCCTGCATAACTGAACTGCAGAGCAGTCAA
N	AX-89876133	Affx-88814194	AX-89818998	Affx-88814194	A	C	SNP	1	8256001	1	6791041	CTTACACCCATGTTAAGCACAGTTCTGAGGATGAC[A/C]TGTTGCCCTGCATAACTGAACTGCAGAGCAGTCAA
Y	AX-166520449	Affx-88814196	AX-89819000	Affx-88814196	A	G	SNP	1	8257693	1	6792733	GGTTTTTATGCAGATGATGGGGCTGGGATGAATCC[A/G]GAAGGTCTGCGCAAATGCATGAGCTTGGGTTATTC
N	AX-89819000	Affx-88814196	AX-89819000	Affx-88814196	A	G	SNP	1	8257693	1	6792733	GGTTTTTATGCAGATGATGGGGCTGGGATGAATCC[A/G]GAAGGTCTGCGCAAATGCATGAGCTTGGGTTATTC
N	AX-166511043	Affx-88814200	AX-89819001	Affx-88814200	A	G	SNP	1	8261012	1	6796052	CATATCACAGGAATTCTTGAAGCAAACTTTATAGA[A/G]CCAGCACATGATAAGCAGGACTTTGAGCGATCATC
N	AX-166511044	Affx-88814201	AX-89819002	Affx-88814201	T	G	SNP	1	8262586	1	6797647	GAATGAACCAGATTAACAACCTGGAGAAGGAACTA[G/T]AGTTCGCTAAAAGGAAGAAGGATCAACTTGCTGCA
N	AX-166511045	Affx-88814203	AX-89819003	Affx-88814203	A	G	SNP	1	8264034	1	6799095	CCGCATAATGCTCACCATAGGGAGATTGCGATTTC[A/G]ATAACCAATTACACTCTGAAGCATGGGGATTCTGG
N	AX-166503104	Affx-88814206	AX-89780738	Affx-88814206	A	G	SNP	1	8268022	1	6803083	TTGCGTGTCCATGACAATCAGGAAGTGATCCTTGC[A/G]GCTGGAGACCAAGAGGCTATCGTGATATCGCCTGG
N	AX-166511046	Affx-88814207	AX-89819004	Affx-88814207	A	G	SNP	1	8275252	1	6810314	TGATCTTCATCGTCGTCGATGGAGCTCACTCTCAC[A/G]CAGCGGAACAACGCGGGAGAGGTCAGTTCGGGCGG
Y	AX-123360251	Affx-88814209	AX-89819006	Affx-88814209	A	G	SNP	1	8276210	1	6811272	CTCATGTGCACGCAATCTTTCTTGGCTTGGTTGCC[A/G]CAGTCTTGACAGCTGACGGTGCTCCCGGACGTCGA
Y	AX-166517617	Affx-88814210	AX-89847158	Affx-88814210	T	C	SNP-SNP	1	8286203	1	6821273	ACACAATAAATGATGAAGTACTGTTTGAACCCCAT[C/T]GGTGAGCAATCCTGATAAAACGTTTTTTTATTAGG
N	AX-166503105	Affx-88814214	AX-89780740	Affx-88814214	A	G	SNP	1	8291948	1	6827016	AGGCTATAAAGAAGCTGCGTTCGACCAAACATTTC[A/G]AGCATCGAGAAAGGCATTGTCCGCAGGAGGGTCCC
N	AX-166511047	Affx-88814215	AX-89819007	Affx-88814215	A	C	SNP	1	8292596	1	6827664	CCGGATCTCTCATGGGGAAAGCGCACTCGGGTTAT[A/C]TTGGACGTTGGGTGTGGTGTTGCGAGTCTTGGAGG
N	AX-166520450	Affx-88814220	AX-89876141	Affx-88814220	T	C	SNP	1	8301699	1	6837236	GATGTCTGAGCGCAGCCAATTCATGCTCCATGTGC[C/T]TGACTTTAACCACACATATATCTCCATTTCTGCTT
N	AX-166503106	Affx-88814225	AX-89780743	Affx-88814225	T	G	SNP	1	8302423	1	6837960	ATTTTTTTCTCCAGCAAACAAATTTTCTTCAAAAA[G/T]AATACCATAGGAGAAGCGAGCATCAGTTATCATGG
N	AX-123360253	Affx-88814229	AX-89819012	Affx-88814229	A	G	SNP	1	8309095	1	6844633	ATGGAGAAGAAGATGCGAGATACCGTACTCAACTC[A/G]GTTCTTGAATTCCCCACTCATCGCCCTTCTTCTTC
Y	AX-166511048	Affx-88814233	AX-89819014	Affx-88814233	A	G	SNP	1	8315260	1	6850799	AAGTTCATAGTCGGTAACAAAGAATTTGGATTCCA[A/G]TCTGGTGGCGTAAAGGATTTTGTGGAAGGTGATGA
Y	AX-166520451	Affx-88814234	AX-89819015	Affx-88814234	A	G	SNP	1	8315314	1	6850853	TTTGTGGAAGGTGATGAGTTCAAGAGCCTTGTCCC[A/G]GACCTGGAAGTGGTTGTTATAGACGGACACCATTT
Y	AX-166511049	Affx-88814237	AX-89819017	Affx-88814237	T	C	SNP	1	8317217	1	6852756	TTCCTGCTGTATAACAAGACAGATTATCTGGTAGC[C/T]CCACCTGGGATGGAGCTTATAGATTATCTGGAGAC
N	AX-166511050	Affx-88814245	AX-89819021	Affx-88814245	T	C	SNP	1	8330719	NA	6866225	GTCAAAACATAGGAGGAGGTATGGTGCTGTTCCCA[C/T]AAGGCATCTTCATGGTGGCTCCGGTGGTTCTTCTA
N	AX-166520452	Affx-88814246	AX-89819022	Affx-88814246	A	G	SNP	1	8330868	1	6866374	ATTGACCATTGGATCACCATACAATACGTTAACGG[A/G]TTGCTGATTAGTGGTGGAGGAACCCTAGATGGCGT
Y	AX-166520453	Affx-88814247	AX-89819023	Affx-88814247	T	C	SNP	1	8330904	1	6866410	TTGCTGATTAGTGGTGGAGGAACCCTAGATGGCGT[C/T]GGAGCCGATGGTTGGCCCTATAATGATTGCCTCCA
N	AX-89819024	Affx-88814254	AX-89819024	Affx-88814254	A	C	SNP	1	8335161	1	6873958	TCGATGTGGCAAATTATGGTGCTCGTGGAGACGGA[A/C]GAACAGATAGCAGCAAGGTAATACTAACAATATAC
N	AX-89876155	Affx-88814254	AX-89819024	Affx-88814254	A	C	SNP	1	8335161	1	6873958	TCGATGTGGCAAATTATGGTGCTCGTGGAGACGGA[A/C]GAACAGATAGCAGCAAGGTAATACTAACAATATAC
N	AX-166503107	Affx-88814255	AX-89780747	Affx-88814255	A	G	SNP	1	8336059	1	6874856	CATCAATCTTTTTGCATGCAAGGACGTGCTTATTA[A/G]CAACGTCAAGATTATAGCTCCGGGAGACAGTCCCA
Y	AX-123365120	Affx-88814258	AX-89876156	Affx-88814258	T	C	SNP	1	8338427	1	6877227	TAACACTCCAAATATAGCCCATCCTCTTGTACTGT[C/T]ACCACCTTGGTTCTGCCTATATTCTGCAAAAATGA
Y	AX-89876158	Affx-88814260	AX-89819027	Affx-88814260	T	G	SNP	1	8339196	1	6877997	ACAGTGGGTGACAAAGTTGTAGGAGGGCTCCCTTT[G/T]AATCCTGACCCTGATAATCTAACCTCCAGGCCACT
N	AX-166509151	Affx-88814261	AX-89803374	Affx-88814261	A	AGTCAC	Indel	1	8339326	1	6878128	CAATAATGAAAGGCCTCTCATGCATCAAAGTGTAA[-/GTCAC]GTACTTTAACAATAGGTTTTTGCACCAAAGTGGAC
Y	AX-166520454	Affx-88814264	AX-89876159	Affx-88814264	A	G	SNP	1	8343967	1	6882768	AAAAAGGGTCCCTTTGGGCTCGCCGATTGGGACTA[A/G]TCCGAGCCCATTGACCTTCATGAAGTCCAAGCTCG
Y	AX-166511051	Affx-88814266	AX-89819029	Affx-88814266	A	G	SNP	1	8347034	1	6885836	CAGCTAGTAAACCATGGATTTCAAGAGGACTTGGG[A/G]TGTGAAAAACCATTTACTGGTTTTGGCTGCTGCTT
N	AX-123360254	Affx-88814267	AX-89819030	Affx-88814267	T	C	SNP	1	8347125	1	6885927	AAGTTGTATACAGAAACTGCTTATTAGGTCCTACA[C/T]GGTTGCATATTTGTCTGAGCTTCTGCCTCTCCTTC
Y	AX-166518641	Affx-88814268	AX-89860669	Affx-88814268	A	ATTG	Indel	1	8348694	1	6887497	TTTCTCATAATGCTGTGCCAACCCAATGAGATCCA[-/TTG]TTGTTGTAGAAATTTGATGGAAAGTAGTATCAATG
N	AX-166503108	Affx-88814271	AX-89780751	Affx-88814271	T	C	SNP	1	8349646	1	6888448	TCTTAGAAACTGCCTCTCTTCTGGCTTAGCAAACT[C/T]GTGGTTATGAACCGGATTGAACTGCACAATCCTCC
Y	AX-166520455	Affx-88814274	AX-89819031	Affx-88814274	T	C	SNP	1	8351921	1	6890723	GCTGCAAGTCATCTATTTGAGCTTGAACCTAAAAA[C/T]ATCGGAAACTACGTGATGCTCTCCAACATATATGC
Y	AX-166511052	Affx-88814283	AX-89819033	Affx-88814283	T	G	SNP	1	8394215	1	6940452	ATACCAGCGAGTGACAACATACTCTGTCATGAACT[G/T]GTCATTACCTCTGCTGGTTCGGGCCAACCCAAAAT
N	AX-166511053	Affx-88814284	AX-89819034	Affx-88814284	A	G	SNP	1	8394279	1	6940516	CCAAAATCACATATCTTTAGGTCACAGTTAGCATT[A/G]ATGAGCAGGTTCCCAGGCTTCAAGTCTCGGTGAAG
N	AX-166511054	Affx-88814288	AX-89819036	Affx-88814288	T	C	SNP	1	8403239	1	6949482	CAGAATCATGATTCAGAGAGGATCTCACTGTCCTG[C/T]GACCACCTTCAAGATAATCATCATCTTCGTCTTCT
Y	AX-89780758	Affx-88814289	AX-89780758	Affx-88814289	T	C	SNP	1	8403816	1	6950058	TGGGAATATTCTGACCTGAATATTATGACACAAGG[C/T]AGAGTTTTGACTCCTAGCTTGGTGACAAAGAAGGG
Y	AX-89819037	Affx-88814291	AX-89819037	Affx-88814291	A	G	SNP	1	8406800	NA	NA	CCACCACTCTCTTGGCCTCGAAAGGCTTAAAACAT[A/G]GTTTGGATGGAAAAGGAAACCATTCAGGAGGGACA
Y	AX-89876166	Affx-88814294	AX-89819039	Affx-88814294	A	C	SNP	1	8423998	1	6972796	AAGGAGGATCCAAATCCAACATACAATCACAATGA[A/C]AATGTTTCCACTCAACTTTGAGAGCCTCAACCTTA
N	AX-166520456	Affx-88814295	AX-89819040	Affx-88814295	A	G	SNP	1	8424345	1	6973143	AGGCACCTCGGCAGAAGAACATAACTGTCACCATT[A/G]AGAAAGGAGAAGAAATCAAAGACAGTTTCGAGGGG
Y	AX-166511055	Affx-88814296	AX-89819041	Affx-88814296	T	C	SNP	1	8424401	1	6973199	GACAGTTTCGAGGGGATAAACATCAACTGGCGCTG[C/T]GTGTGCAGCGGAGGAGAGGATGAGCAGAACCGCCA
N	AX-166511056	Affx-88814297	AX-89819042	Affx-88814297	T	G	SNP	1	8424904	1	6973702	TCTAGACAACTCGGAGTTGAGGAGGATACTGCTGA[G/T]TACTACAAACCGTTCTATCTTGGTCATCGAGGATA
[truncated: 36,507 more rows]
