# Supplementary material
Source: publisher figshare collection journal article supplement (https://gsajournals.figshare.com/articles/dataset/_/6007715)
Supplement: Supplementary file 1 [file 1]

**Table S1.** Statistics from a mixed model analysis of Fusarium wilt resistance among 565 strawberry germplasm accessions grown in randomized complete blocks experiment designs in 2016 and 2017 in Davis, California.

| Source                  | Degrees<br>of<br>Freedom | Mean<br>Square | F     | $p > F$                     | Percent<br>$\sigma^2_{Phenotype}$<br>Explained |
|-------------------------|--------------------------|----------------|-------|-----------------------------|------------------------------------------------|
| 2016                    |                          |                |       |                             |                                                |
| Block                   | 3                        | 0.07           | 0.31  | 0.82                        | 0.000                                          |
| Accession               | 564                      | 13.48          | 59.37 | $< 2.23 \times 10^{-308}^a$ | 0.936                                          |
| Residual                | 1681                     | 0.23           |       |                             | 0.064                                          |
| 2017                    |                          |                |       |                             |                                                |
| Block                   | 3                        | 5.07           | 6.97  | $1.16 \times 10^{-4}$       | 0.003                                          |
| Accession               | 558                      | 7.02           | 9.64  | $1.02 \times 10^{-295}$     | 0.674                                          |
| Residual                | 1774                     | 1.10           |       |                             | 0.322                                          |
| Combined                |                          |                |       |                             |                                                |
| Block                   | 3                        | 3.03           | 6.26  | $3.10 \times 10^{-4}$       | 0.000                                          |
| Accession               | 564                      | 13.48          | 27.75 | $< 2.23 \times 10^{-308}^a$ | 0.661                                          |
| Year                    | 1                        | 8.20           | 16.83 | $4.19 \times 10^{-5}$       | 0.054                                          |
| Accession $\times$ Year | 558                      | 2.01           | 4.15  | $1.34 \times 10^{-146}$     | 0.127                                          |
| Residual                | 3458                     | 0.49           |       |                             | 0.158                                          |

<sup>a</sup> $2.23 \times 10^{-308}$  being the default smallest representable value in R. R analyses return 0.
