# Supplementary material
Source: publisher figshare collection journal article supplement (https://gsajournals.figshare.com/articles/dataset/_/6007715)
Supplement: Supplementary file 2 [file 1]

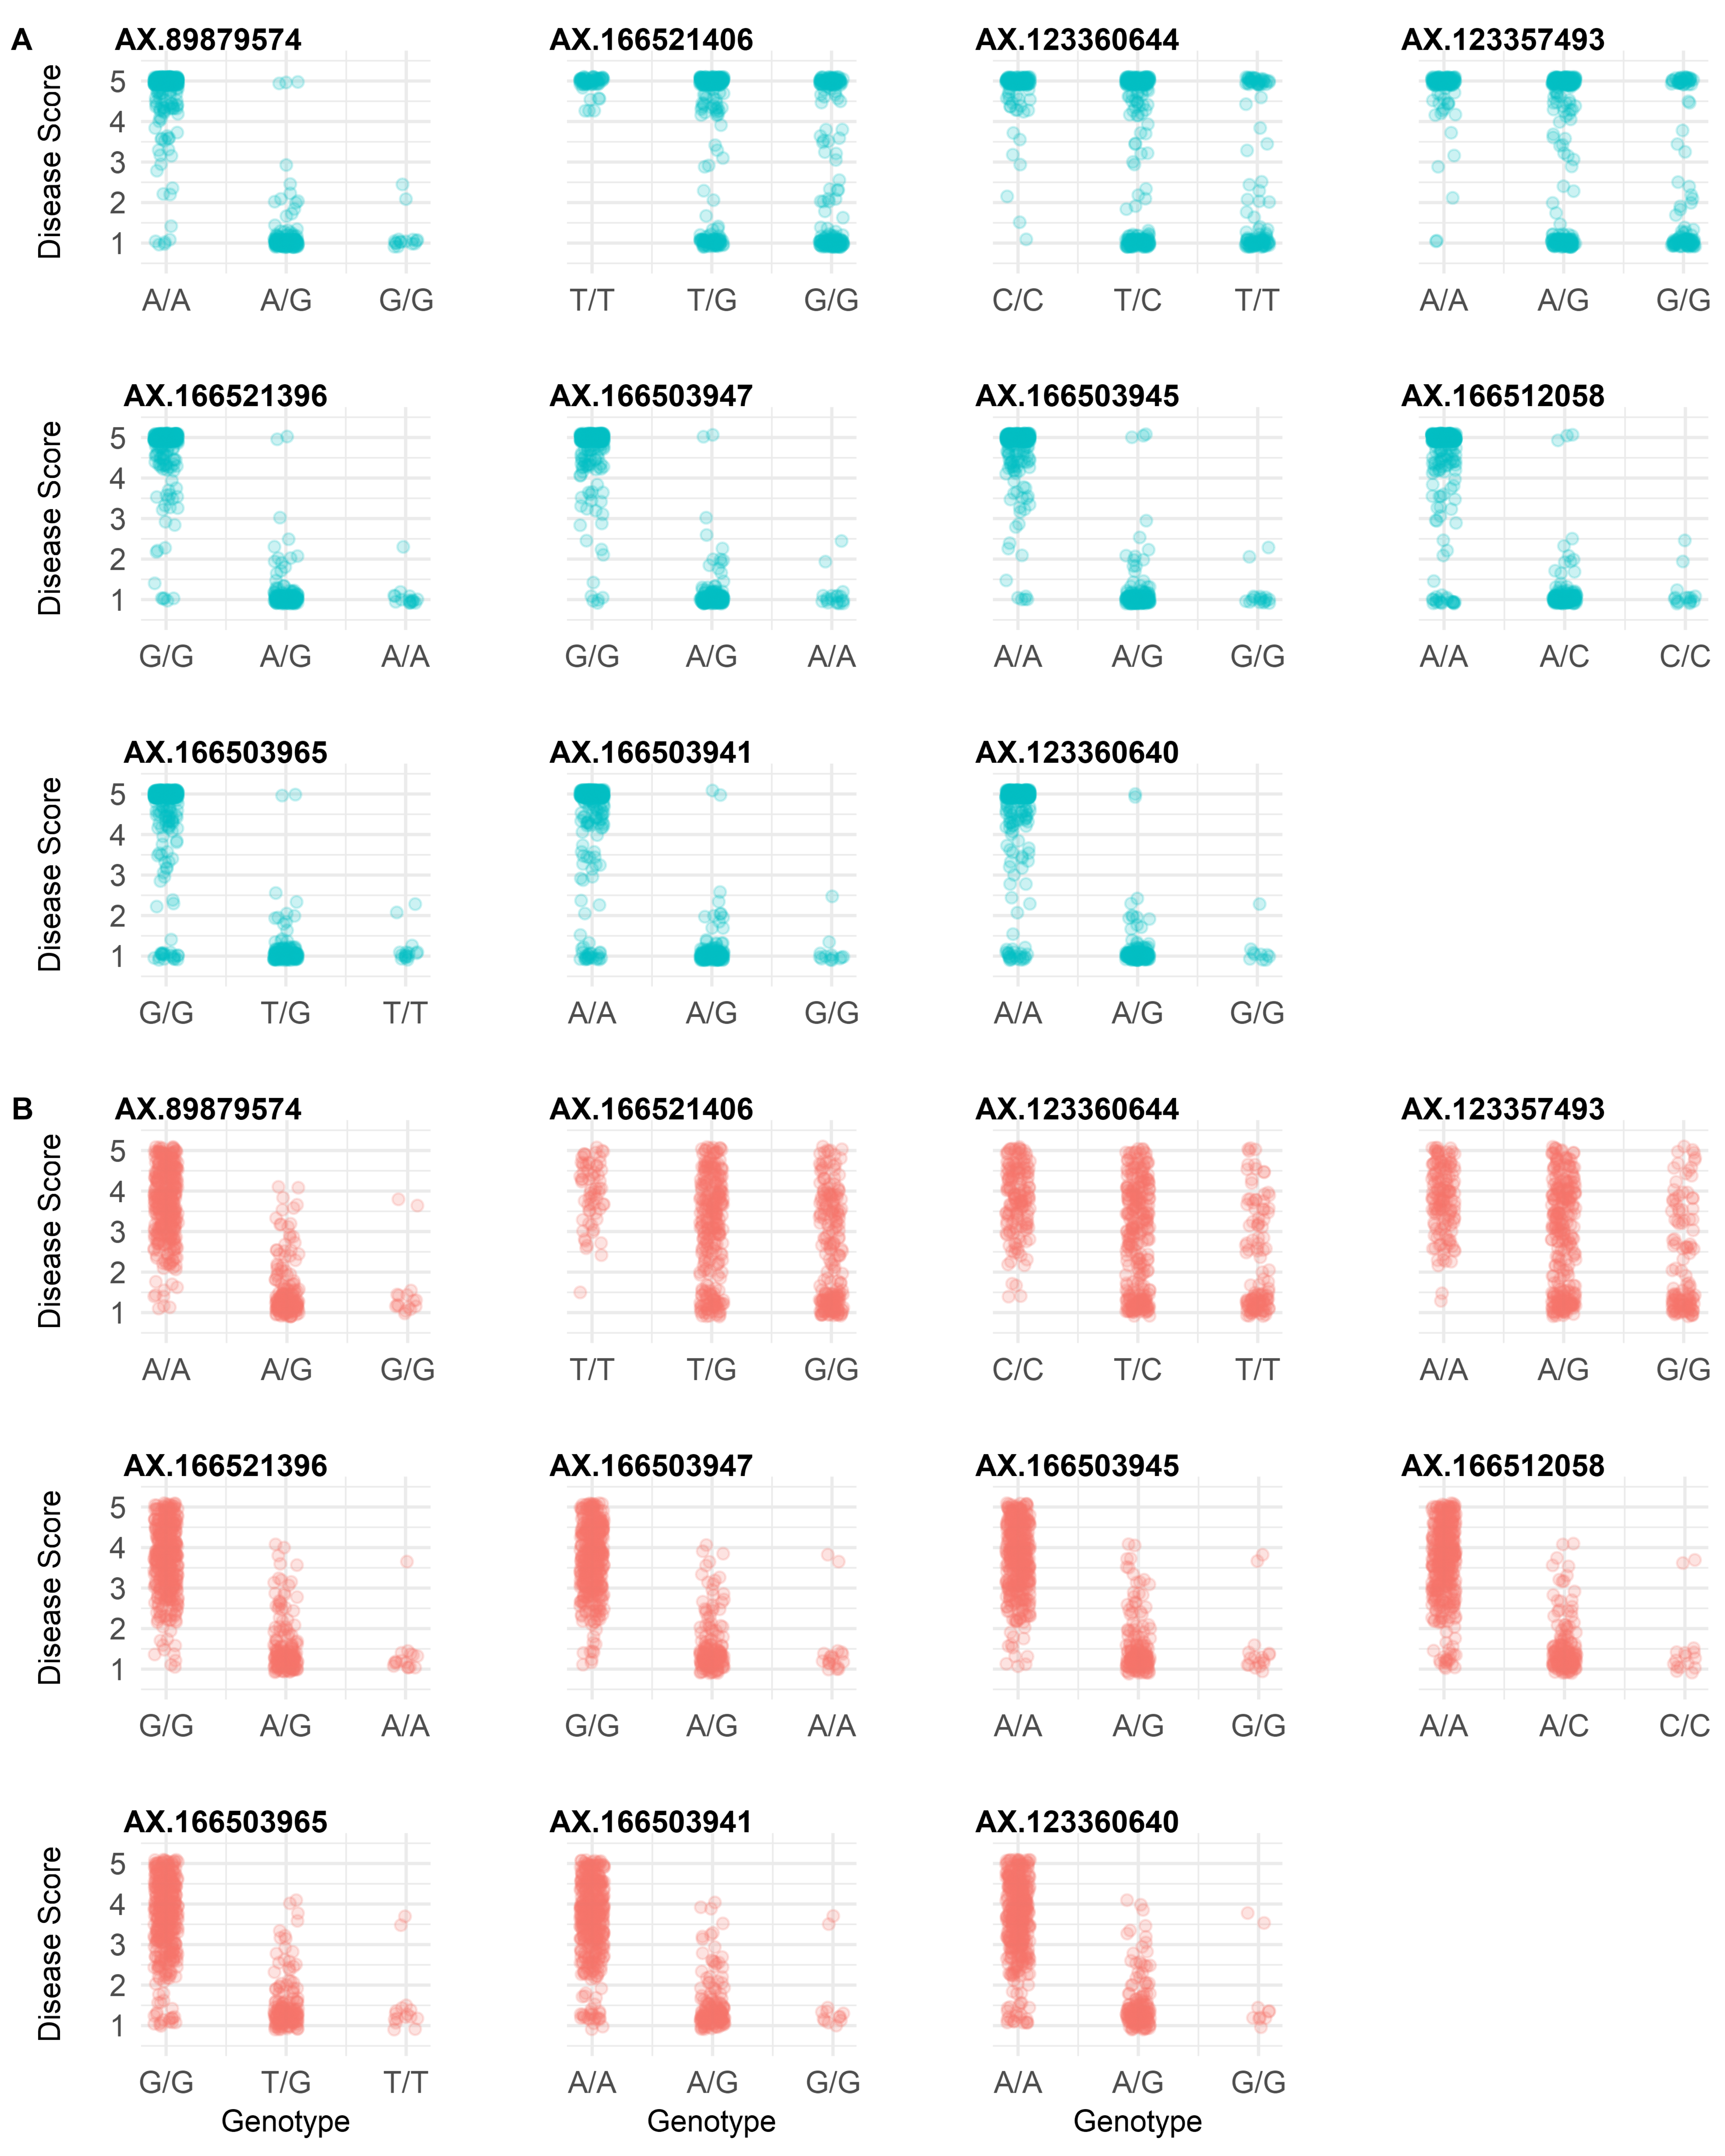



**Supplemental File 6.** Genotypes and phenotypes for SNPs in linkage disequilibrium (LD) with a Fusarium wilt resistance gene (*Fw1*) on chromosome 2C in strawberry. The individual plots show Fusarium wilt phenotypes for 565 germplasm accessions among each of the three genotypic classes for 11 SNPS in LD with *Fw1* on chromosome 2C. Plants were artificially inoculated with isolate AMP132 of *Fusarium oxysporum* f. sp. *fragariae* and phenotyped nine weeks post-inoculation in (A) 2016 and 36 weeks post-inoculation in (B) 2017 field experiments in Davis, California.
